# Supplementary material for: Enantioselective synthesis of chiral 2,2,2-trifluoroethyl lactams via asymmetric hydrogenation
Source: Royal Society of Chemistry journal article supplement (doi:10.1039/d3qo00319a), 2023-01-01
Supplement: d3qo00319a1.pdf [file d3qo00319a1.pdf]

*Supporting Information for:*

**Enantioselective Synthesis of Chiral 2,2,2-Trifluoroethyl Lactams via  
Asymmetric Hydrogenation**

Chaochao Xie,<sup>a</sup> Qianling Guo,<sup>a</sup> Zhihong Yang,<sup>a</sup> Guofu Zi,<sup>a</sup> Yuping Huang<sup>\*b</sup> and  
Guohua Hou<sup>\*a</sup>

[a] Key Laboratory of Radiopharmaceuticals, College of Chemistry, Beijing Normal University,  
Beijing 100875, China

[b] Research Institute of Petroleum Processing, SINOPEC, Beijing 100083, China

**CONTENTS**

|                                                                                                           |     |
|-----------------------------------------------------------------------------------------------------------|-----|
| 1. Experimental section .....                                                                             | 2   |
| 2. General procedure for synthesis of substrates <b>1</b> , <b>3</b> and compounds <b>5 - 8</b> .....     | 2   |
| 3. General procedure for asymmetric hydrogenation of compounds <b>1</b> and <b>3</b> .....                | 7   |
| 4. Procedure for asymmetric hydrogenation of <b>1a</b> on gram-scale .....                                | 7   |
| 5. The characterization data for substrates <b>1</b> and <b>3</b> .....                                   | 7   |
| 6. NMR, GC or SFC and HPLC, optical rotation and HRMS data of compounds <b>2</b> , and <b>4 - 8</b> ..... | 18  |
| 7. NMR, GC and HPLC spectra .....                                                                         | 34  |
| 8. X-ray crystallographic analysis of compound <b>2l</b> .....                                            | 210 |

## 1. Experimental section

### General Information:

All the air or moisture sensitive reactions and manipulations were performed by using standard Schlenk techniques and in a nitrogen-filled glovebox.  $^1\text{H}$  NMR,  $^{13}\text{C}$  NMR and  $^{19}\text{F}$  NMR spectra were recorded on Bruker AV (400 MHz) spectrometers and JEOL JNM-ECX600P and JNM-ECS600 (400 MHz or 600 MHz) spectrometers.  $\text{CDCl}_3$  was the solvent used for the NMR analysis, with TMS as the internal standard. Chemical shifts were reported upfield to TMS (0.00 ppm) for  $^1\text{H}$  NMR. Data is represented as follows: chemical shift, integration, multiplicity (s = singlet, d = doublet, dd = double of doublets, t = triplet, q = quartet, m = multiplet) and coupling constants ( $J$ ) in Hertz (Hz). Optical rotation was determined using Autopol III Automatic polarimeter (Rudolph research Analytical). GC analysis was conducted on an Agilent 7890A series instrument. HPLC analysis was conducted on Agilent 1260 series instrument. SFC analysis was conducted on Agilent 1260 series instrument. HRMS were recorded on a Waters LCT Premier XE mass spectrometer with APCI or ESI.

### 2. General procedure for synthesis of substrates 1, 3 and compounds 5 - 8.

**Method A:** 1a-1r were prepared by the following protocol.<sup>[1, 2]</sup>

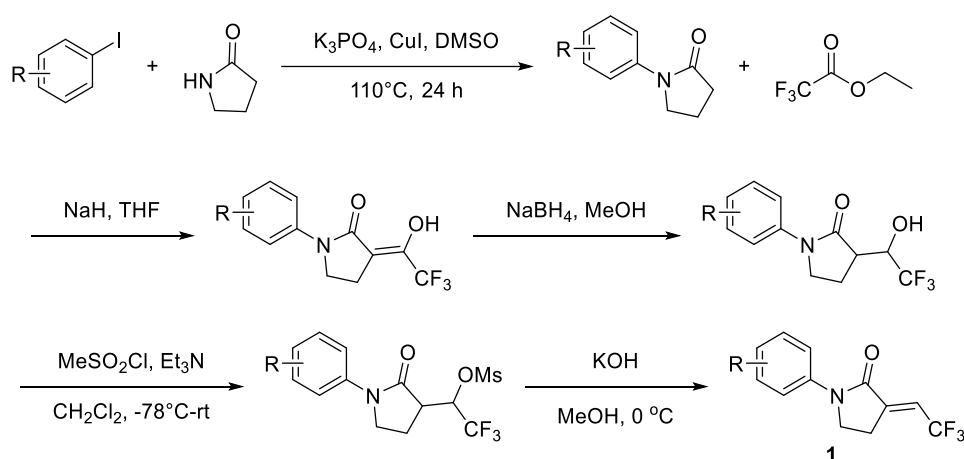

The 2-pyrrolidinone (30 mmol), iodoarenes (20 mmol), potassium phosphate (60 mmol),  $\text{CuI}$  (2 mmol) were placed in a three-neck round bottom flask equipped with a stir bar.  $\text{DMSO}$  (24 mL) was added under nitrogen. The reaction mixture was heated to

110 °C. After 24 h, the reaction mixture was diluted with ethyl acetate, washed with saturated brine, dried over Na<sub>2</sub>SO<sub>4</sub> and concentrated in vacuo. The residue was purified by column chromatography over silica gel to give product in 55-87% yield.

Sodium hydride (20 mmol) was placed in a three-neck round bottom flask. THF (20 mL) was added under nitrogen. Then a solution of trifluoromethyl ethyl acetate (12 mmol) and the pyrrolidones derivatives (10 mmol) in THF (20 mL) was added dropwise. The mixture was stirred for 24 h at room temperature and adjusted PH to 3 with 1M HCl solution. The organic phase was extracted with ethyl acetate, washed with saturated brine, dried over Na<sub>2</sub>SO<sub>4</sub> and concentrated in vacuo. The crude product was purified with column chromatography to give 3-(2,2,2-trifluoro-1-hydroxyethylidene) pyrrolidin-2-one in 50-90% yield.

The 3-(2,2,2-trifluoro-1-hydroxyethylidene)pyrrolidin-2-one (10 mmol) was dissolved in methanol (60 mL), NaBH<sub>4</sub> was added (15 mmol) at 0 °C and the reaction mixture was stirred at room temperature for 2 h. The organic phase was extracted with ethyl acetate, then washed with saturated brine, and dried over Na<sub>2</sub>SO<sub>4</sub>, concentrated in vacuo to give crude product 3-(2,2,2-trifluoro-1-hydroxyethyl) pyrrolidin-2-one without purification.

To a solution of 3-(2,2,2-trifluoro-1-hydroxyethyl) pyrrolidin-2-one (10 mmol) in CH<sub>2</sub>Cl<sub>2</sub> (27 mL) was added Et<sub>3</sub>N (10 mmol) under nitrogen. The solution was stirred for 30 min at room temperature. Then methanesulfonyl chloride (15 mmol) was added dropwise to the solution at -78 °C. After stirred at -78 °C for 30 min, the reaction mixture was warmed to room temperature. Then Et<sub>3</sub>N (15 mmol) was added, followed by stirring at room temperature for 3 h. The solution was stirred overnight and extracted with CH<sub>2</sub>Cl<sub>2</sub>. The organic phase was washed with saturated brine, and dried over Na<sub>2</sub>SO<sub>4</sub>, concentrated in vacuo. The residue was purified by chromatography over silica gel.

To a solution of 2,2,2-trifluoro-1-(2-oxopyrrolidin-3-yl)ethylmethanesulfonate (10 mmol) in methanol (30 mL) was added KOH (10 mmol) at 0 °C for 1 h. The organic phase was extracted with ethyl acetate, then washed with saturated brine, and dried over

Na<sub>2</sub>SO<sub>4</sub>, concentrated in vacuo. The residue was purified by chromatography over silica gel to give compound **1** in 64-87% yield.

### General Procedure for Synthesis of Product **1s** and **1t**

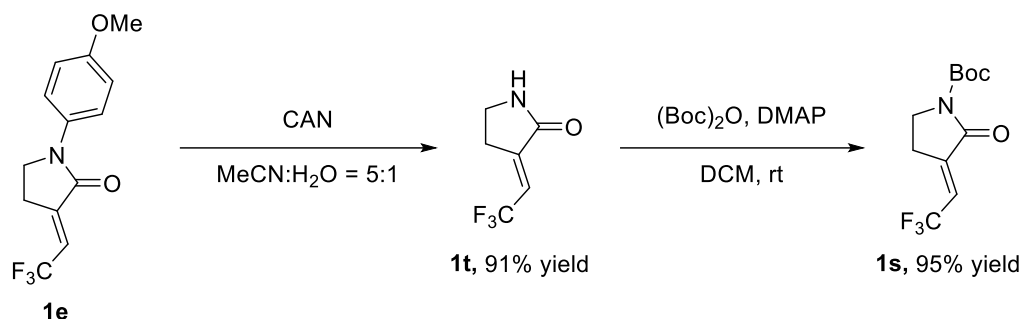

To a cold solution (0 °C) of **1e** in CH<sub>3</sub>CN/H<sub>2</sub>O (5:1) was added CAN (ceric ammonium nitrate, 4.4 equiv.). The reaction was stirred for 30 min at 0 °C and then 12 h at room temperature. The reaction mixture was diluted with EtOAc, washed with saturated aqueous NaHCO<sub>3</sub>, brine, dried (Na<sub>2</sub>SO<sub>4</sub>), and then concentrated. Purification of the crude product by flash chromatography afforded the desired product **1t**.

The compound **1t** (4.0 mmol), DMAP (0.1 equiv.), and triethylamine (1.5 equiv.) were dissolved in dichloromethane (8.0 mL), followed by slow addition of (Boc)<sub>2</sub>O (2.0 equiv.). The mixture was stirred further for 5 h at room temperature. The reaction mixture was concentrated under vacuum, and the residue was purified by chromatography on silica gel to afford the desired product **1s**.

**Method C: 3a-3m** were prepared by the following protocol.

The 2-Piperidone (30 mmol), iodoarenes (20 mmol), potassium phosphate (60 mmol), CuI (2 mmol) were placed in a three-neck round bottom flask equipped with a stir bar. DMSO (24 mL) was added under nitrogen. The reaction mixture was heated to 130 °C. After 48 h, the reaction mixture was diluted with ethyl acetate, washed with saturated brine, dried over Na<sub>2</sub>SO<sub>4</sub> and concentrated in vacuo. The residue was purified by column chromatography over silica gel to give product in 50-75% yield.

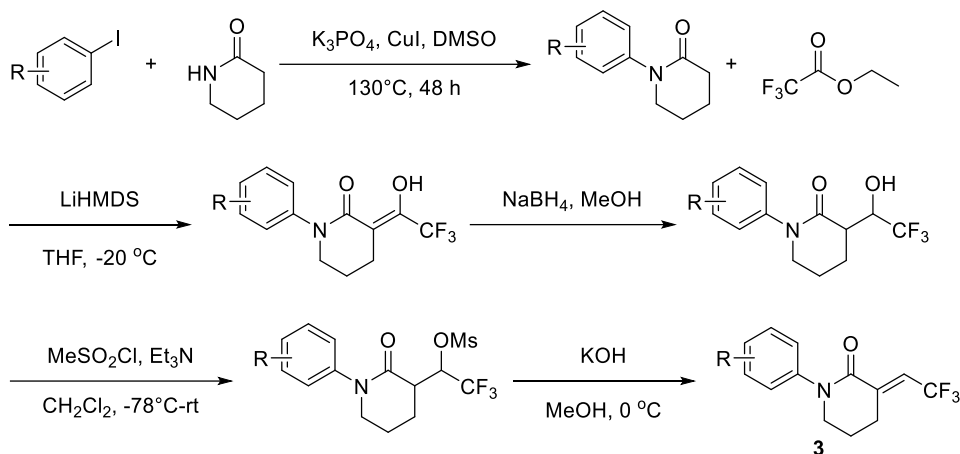

The piperidone s derivatives (10 mmol) was placed in a three-neck round bottom flask. THF (20 mL) was added under nitrogen. Then slowly add tetrahydrofuran solution of LiHMDS (Lithium bis(trimethylsilyl)amide, 15 mmol). Next, a solution of trifluoromethyl ethyl acetate (12 mmol) in THF (20 mL) was added dropwise. The mixture was stirred for 6 h at  $-20\text{ }^{\circ}\text{C}$  and adjusted PH to 3 with 1M HCl solution. The organic phase was extracted with ethyl acetate, washed with saturated brine, dried over  $\text{Na}_2\text{SO}_4$  and concentrated in vacuo. The crude product was purified with column chromatography to give 3-(2,2,2-trifluoro-1-hydroxyethylidene)piperidin-2-one in 60-88% yield..

The next synthesis method refers to the synthesis of substrate **1a**.

### General Procedure for Synthesis of Product 5

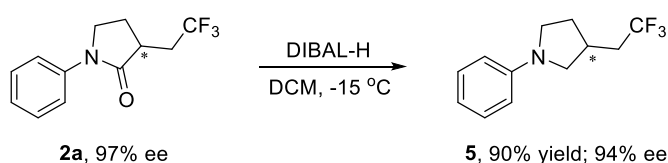

To a flame-dried round bottom flask charged with a magnetic stir and substrate **2a** was added  $\text{CH}_2\text{Cl}_2$  and cooled to  $-15\text{ }^{\circ}\text{C}$ . Following, a freshly prepared 1M solution of DIBAL-H (Diisobutylaluminium hydride) in toluene (1.2 equiv.) was added dropwise to and the reaction was stirred at  $-15\text{ }^{\circ}\text{C}$  until completion was observed by TLC analysis. Upon completion the reaction was cooled to  $0\text{ }^{\circ}\text{C}$  and few milliliters of water are added to quench the reaction. The reaction was transferred to a separatory funnel and the milky aqueous layer was extracted twice with  $\text{CH}_2\text{Cl}_2$ . The combined organic layer was dried over  $\text{MgSO}_4$  and concentrated. The crude product was purified by column

chromatography to give product **5** in 90% yield.

### General Procedure for Synthesis of Product **6**

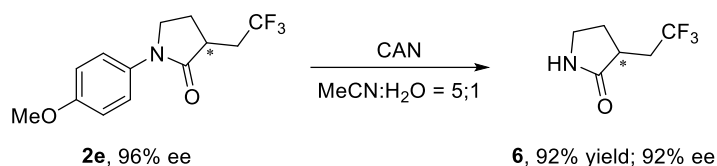

To a cold solution (0 °C) of **2e** in CH<sub>3</sub>CN/H<sub>2</sub>O (5:1) was added CAN (ceric ammonium nitrate, 4.4 equiv.). The reaction was stirred for 30 min at 0 °C and then 12 h at room temperature. The reaction mixture was diluted with EtOAc, washed with saturated aqueous NaHCO<sub>3</sub>, brine, dried (Na<sub>2</sub>SO<sub>4</sub>), and then concentrated. Purification of the crude product by flash chromatography afforded the desired product **6** in 92% yield.

### General Procedure for Synthesis of Product **8**

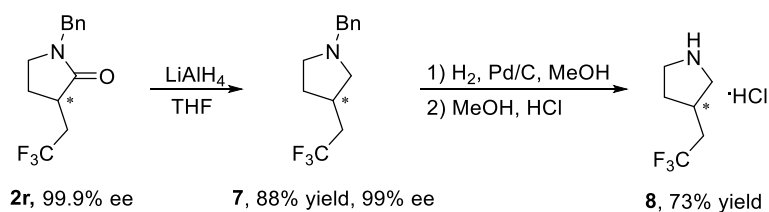

LiAlH<sub>4</sub> (2.5 equiv.) was added to a solution of **2r** in THF. The resulting mixture was refluxed for 10 h and quenched at 0 °C with 25 wt.% NaOH. The formed precipitate was filtered off on a plug of celite and the filter cake washed with Et<sub>2</sub>O. The filtrate was washed with brine, dried (Na<sub>2</sub>SO<sub>4</sub>) and concentrated under reduced pressure affording the crude amine. Purification of the crude product by flash chromatography afforded the desired product **7** in 88% yield.

A solution of **7** in methanol was charged with palladium on carbon (2.5 equiv.), then hydrogen gas (1 atm), and the mixture was stirred for 24 h. Then filter the reaction solution and collect the filtrate, added 4 mol/L hydrochloric acid in methanol to the filtrate. The reaction mixture was vigorously stirred at 45 °C in an oil bath for 16 h. The mixture was concentrated under reduced pressure, washed with Et<sub>2</sub>O, and dried under reduced pressure to give **8** as a brown oil in 73% yield.

### 3. General procedure for asymmetric hydrogenation of compounds **1** and **3**

At room temperature,  $[\text{Rh}(\text{COD})\text{Cl}]_2$  and (*R, R*)-f-spirophos were mixed in methanol at a molar ratio of 0.5:1.1 for 20 minutes in a nitrogen-filled glove box to prepare a stock solution. An aliquot of the catalyst solution (1.0 mL, 0.00125 mmol) was transferred by syringe into the vials charged with different substrates **1** (0.125 mmol for each) in anhydrous MeOH (2.0 ml). The vials were then placed into a steel autoclave which hydrogen gas was charged. The reaction mixture was stirred under  $\text{H}_2$  (10 atm) at room temperature for 1 h for the substrates. The hydrogen gas was released slowly and carefully. The solution was passed through a short column of silica gel to remove the metal complex. The conversion of products was determined by GC or  $^1\text{H}$  NMR analysis. The crude products were concentrated and purified by column chromatography and the ee values were determined by HPLC or SFC analysis on a chiral stationary phase.

### 4. Procedure for asymmetric hydrogenation of **1a** on gram-scale.

At room temperature,  $[\text{Rh}(\text{COD})\text{Cl}]_2$  and (*R, R*)-f-spirophos were mixed in methanol at a molar ratio of 0.5:1.1 for 20 minutes in a nitrogen-filled glove box to prepare a stock solution. An aliquot of the catalyst solution (1.0 mL, 0.00125 mmol) was transferred by syringe into the vials charged with substrate **1a** (13.2 mmol) in anhydrous MeOH (5.0 ml). The vials were then placed into a steel autoclave which hydrogen gas was charged. The reaction mixture was stirred under  $\text{H}_2$  (80 atm) at 40 °C for 5 days. The hydrogen gas was released slowly and carefully. The solid was washed with  $\text{CH}_2\text{Cl}_2$ , and filtered to give the product **2a** as a white solid (3.05 g, 96% yield) with 98% ee determined by HPLC with a chiral column.

### 5. The characterization data for substrates **1** and **3**

(*E*)-1-phenyl-3-(2,2,2-trifluoroethylidene)pyrrolidin-2-one (**1a**)

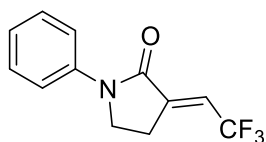

White solid; Yield: 82%; (PE/EA = 12/1);  $^1\text{H}$  NMR ( $\text{CDCl}_3$ , 600 MHz)  $\delta$ : 7.71 (t,  $J = 6.5$  Hz, 2H), 7.42 – 7.39 (m, 2H), 7.24 – 7.20 (m, 1H), 6.64 – 6.56 (m, 1H), 3.98 – 3.93 (m, 2H), 3.13 – 3.10 (m, 2H);  $^{13}\text{C}$  NMR ( $\text{CDCl}_3$ , 101 MHz)  $\delta$ : 164.9, 142.8, 138.9, 129.2, 125.8, 123.5 (q,  $J = 270.2$  Hz), 120.1, 118.7 (q,  $J = 35.6$  Hz), 45.5, 22.2;  $^{19}\text{F}$  NMR ( $\text{CDCl}_3$ , 377 MHz)  $\delta$ : -60.8 (t,  $J = 3.4$  Hz, 3F); TOF-HRMS Calcd. for  $\text{C}_{12}\text{H}_{11}\text{NOF}_3$  [ $\text{M}+\text{H}^+$ ]: 242.0787, found 242.0790.

*(E)*-1-(*m*-tolyl)-3-(2,2,2-trifluoroethylidene)pyrrolidin-2-one (**1b**)

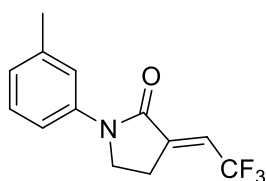

White solid; Yield: 85%; (PE/EA = 10/1);  $^1\text{H}$  NMR ( $\text{CDCl}_3$ , 400 MHz)  $\delta$ : 7.55 (s, 1H), 7.49 – 7.46 (m, 1H), 7.28 (t,  $J = 7.9$  Hz, 1H), 7.04 – 7.02 (m, 1H), 6.62 – 6.55 (m, 1H), 3.94 (t,  $J = 6.3$  Hz, 2H), 3.12 – 3.06 (m, 2H), 2.38 (s, 3H);  $^{13}\text{C}$  NMR ( $\text{CDCl}_3$ , 101 MHz)  $\delta$ : 164.8, 142.9 (d,  $J = 5.1$  Hz), 139.1, 138.8, 129.0, 126.7, 123.6 (q,  $J = 271.7$  Hz), 118.6 (q,  $J = 35.4$  Hz), 117.2, 45.7, 22.2, 21.7;  $^{19}\text{F}$  NMR ( $\text{CDCl}_3$ , 377 MHz)  $\delta$ : -60.8 (t,  $J = 3.8$  Hz, 3F); TOF-HRMS Calcd. for  $\text{C}_{13}\text{H}_{13}\text{NOF}_3$  [ $\text{M}+\text{H}^+$ ]: 256.0943, found 256.0940.

*(E)*-1-(3-methoxyphenyl)-3-(2,2,2-trifluoroethylidene)pyrrolidin-2-one (**1c**)

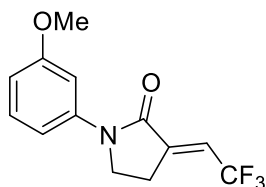

White solid; Yield: 87%; (PE/EA = 10/1);  $^1\text{H}$  NMR ( $\text{CDCl}_3$ , 400 MHz)  $\delta$ : 7.47 (s, 1H), 7.30 (t,  $J = 8.2$  Hz, 1H), 7.19 (d,  $J = 8.2$  Hz, 1H), 6.77 (d,  $J = 8.2$ , 1H), 6.63 – 6.55 (m, 1H), 3.93 (t,  $J = 6.5$  Hz, 2H), 3.82 (s, 3H), 3.12 – 3.07 (m, 2H);  $^{13}\text{C}$  NMR ( $\text{CDCl}_3$ , 101 MHz)  $\delta$ : 164.9, 160.19, 142.89 (q,  $J = 5.0$  Hz), 140.09, 129.8, 123.5 (q,  $J = 270.3$  Hz), 118.6 (q,  $J = 35.6$  Hz), 111.9, 111.4, 106.1, 55.4, 45.6, 22.0;  $^{19}\text{F}$  NMR ( $\text{CDCl}_3$ , 377 MHz)  $\delta$ : -60.8 (t,  $J = 3.8$  Hz, 3F); TOF-HRMS Calcd. for  $\text{C}_{13}\text{H}_{13}\text{NO}_2\text{F}_3$  [ $\text{M}+\text{H}^+$ ]: 272.0892, found 272.0890.

*(E)*-1-(*p*-tolyl)-3-(2,2,2-trifluoroethylidene)pyrrolidin-2-one (**1d**)

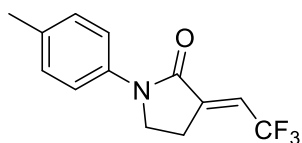

White solid; Yield: 75%; (PE/EA = 10/1);  $^1\text{H}$  NMR ( $\text{CDCl}_3$ , 400 MHz)  $\delta$ : 7.59 (d,  $J = 8.6$  Hz, 2H), 7.20 (d,  $J = 8.2$  Hz, 2H), 6.62 – 6.55 (m, 1H), 3.93 (t,  $J = 6.4$  Hz, 2H) 3.13 – 3.08



(m, 2H); 2.34 (s, 3H);  $^{13}\text{C}$  NMR ( $\text{CDCl}_3$ , 101 MHz)  $\delta$ : 164.7, 142.9 (q,  $J = 4.6$  Hz), 136.4, 135.6, 129.7, 123.6 (q,  $J = 270.3$  Hz), 120.1, 118.4 (q,  $J = 35.5$  Hz), 45.6 (d,  $J = 0.9$  Hz), 22.2 (d,  $J = 0.8$  Hz), 21.0;  $^{19}\text{F}$  NMR ( $\text{CDCl}_3$ , 377 MHz)  $\delta$ : -60.8 (t,  $J = 3.4$  Hz, 3F); TOF-HRMS Calcd. for  $\text{C}_{13}\text{H}_{13}\text{NOF}_3$  [ $\text{M}+\text{H}^+$ ]: 256.0943, found 256.0940.

*(E)*-1-(4-methoxyphenyl)-3-(2,2,2-trifluoroethylidene)pyrrolidin-2-one (**1e**)

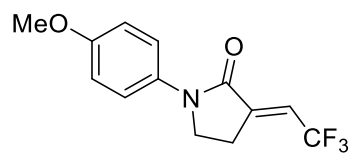

White solid; Yield: 73%; (PE/EA = 10/1);  $^1\text{H}$  NMR ( $\text{CDCl}_3$ , 400 MHz)  $\delta$ : 7.62 (d,  $J = 9.2$  Hz, 2H), 6.93 (d,  $J = 9.2$  Hz, 2H), 6.62 – 6.54 (m, 1H), 3.92 (t,  $J = 6.2$  Hz, 2H), 3.81 (s, 3H), 3.13 – 3.08 (m, 2H);  $^{13}\text{C}$  NMR ( $\text{CDCl}_3$ , 101 MHz)  $\delta$ : 164.6, 157.4, 142.8 (d,  $J = 5.2$  Hz), 132.1, 123.6 (q,  $J = 270.2$  Hz), 121.7, 118.3 (q,  $J = 35.5$  Hz), 114.3, 55.6, 45.9 (t,  $J = 1.0$  Hz), 22.2 (t,  $J = 1.0$  Hz);  $^{19}\text{F}$  NMR ( $\text{CDCl}_3$ , 377 MHz)  $\delta$ : -60.7 (t,  $J = 3.4$  Hz, 3F); TOF-HRMS Calcd. for  $\text{C}_{13}\text{H}_{13}\text{NO}_2\text{F}_3$  [ $\text{M}+\text{H}^+$ ]: 272.0892, found 272.0890.

*(E)*-1-(3-fluorophenyl)-3-(2,2,2-trifluoroethylidene)pyrrolidin-2-one (**1f**)

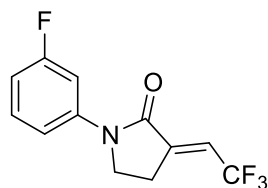

White solid; Yield: 68%; (PE/EA = 10/1);  $^1\text{H}$  NMR ( $\text{CDCl}_3$ , 400 MHz)  $\delta$ : 7.64 (dt,  $J = 11.2, 2.3$  Hz, 1H), 7.44 (dd,  $J = 8.3, 2.1$  Hz, 1H), 7.36 (td,  $J = 8.2, 6.4$  Hz, 1H), 6.92 (td,  $J = 8.2, 2.4$  Hz, 1H), 6.66 – 6.58 (m, 1H), 3.94 (t,  $J = 6.6$  Hz, 2H), 3.15 – 3.10 (m, 2H);  $^{13}\text{C}$  NMR ( $\text{CDCl}_3$ , 101 MHz)  $\delta$ : 164.9, 162.9 (d,  $J = 245.5$  Hz), 142.2 (q,  $J = 4.9$  Hz), 140.3 (d,  $J = 10.5$  Hz), 130.2 (d,  $J = 9.2$  Hz), 123.3 (q,  $J = 271.7$  Hz), 119.2 (q,  $J = 35.7$  Hz), 114.9 (d,  $J = 3.0$  Hz), 112.4 (d,  $J = 21.3$  Hz), 107.4 (d,  $J = 26.6$  Hz), 45.4, 21.9;  $^{19}\text{F}$  NMR ( $\text{CDCl}_3$ , 377 MHz)  $\delta$ : -60.9 (t,  $J = 3.8$  Hz, 3F), -110.7 – -110.8 (m, 1F); TOF-HRMS Calcd. for  $\text{C}_{12}\text{H}_{10}\text{NOF}_4$  [ $\text{M}+\text{H}^+$ ]: 260.0693, found 260.0690.

*(E)*-1-(4-fluorophenyl)-3-(2,2,2-trifluoroethylidene)pyrrolidin-2-one (**1g**)

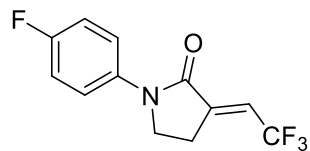

White solid; Yield: 65%; (PE/EA = 10/1);  $^1\text{H}$  NMR ( $\text{CDCl}_3$ , 400 MHz)  $\delta$ : 7.73 – 7.64 (m, 2H), 7.15 – 7.03 (m, 2H), 6.69 – 6.51 (m, 1H), 4.02 – 3.79 (m, 2H), 3.15 – 3.10 (m, 2H);  $^{13}\text{C}$  NMR ( $\text{CDCl}_3$ , 101 MHz)  $\delta$ : 164.8, 160.2 (d,  $J = 246.1$  Hz), 142.4 (q,  $J = 5.1$  Hz), 135.0 (d,  $J = 2.9$  Hz), 123.5 (q,  $J = 270.3$  Hz), 121.8 (q,  $J = 8.1$  Hz), 118.9 (q,  $J = 35.6$  Hz),

116.0 (d,  $J = 22.6$  Hz), 45.8, 22.1;  $^{19}\text{F}$  NMR ( $\text{CDCl}_3$ , 377 MHz)  $\delta$ : -60.8 (t,  $J = 3.8$  Hz, 3F), -115.7 – -110.8 (m, 1F); TOF-HRMS Calcd. for  $\text{C}_{12}\text{H}_{10}\text{NOF}_4$  [ $\text{M}+\text{H}^+$ ]: 260.0693, found 260.0690.

(*E*)-1-(3-bromophenyl)-3-(2,2,2-trifluoroethylidene)pyrrolidin-2-one (**1h**)

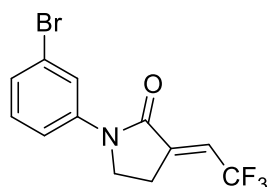

Yellow solid; Yield: 87%; (PE/EA = 20/1);  $^1\text{H}$  NMR ( $\text{CDCl}_3$ , 400 MHz)  $\delta$ : 7.91 (t,  $J = 2.0$  Hz, 1H), 7.71 (ddd,  $J = 8.1, 2.0, 0.9$  Hz, 1H), 7.35 (ddd,  $J = 8.0, 1.6, 1.0$  Hz, 1H), 7.28 (d,  $J = 8.1$  Hz, 1H), 6.65 – 6.57 (m, 1H), 3.93 (t,  $J = 6.4$  Hz, 2H), 3.15 – 3.10 (m, 2H);  $^{13}\text{C}$  NMR ( $\text{CDCl}_3$ , 101 MHz)  $\delta$ : 165.0, 142.2 (q,  $J = 5.1$  Hz), 140.1, 130.4, 128.7, 122.9, 122.8, 122.4 (q,  $J = 268.9$  Hz), 119.3 (q,  $J = 35.7$  Hz), 118.3, 45.4 (q,  $J = 1.2$  Hz), 22.1 (q,  $J = 0.9$  Hz);  $^{19}\text{F}$  NMR ( $\text{CDCl}_3$ , 377 MHz)  $\delta$ : -61.0 (t,  $J = 3.4$  Hz, 3F); TOF-HRMS Calcd. for  $\text{C}_{12}\text{H}_{10}\text{NOF}_3\text{Br}$  [ $\text{M}+\text{H}^+$ ]: 319.9892, found 319.9890.

(*E*)-1-(4-(tert-butyl)phenyl)-3-(2,2-trifluoroethylidene) pyrrolidin-2-one (**1i**)

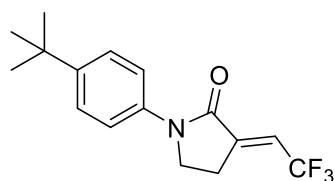

White solid; Yield: 78%; (PE/EA = 20/1);  $^1\text{H}$  NMR ( $\text{CDCl}_3$ , 600 MHz)  $\delta$ : 7.62 (d,  $J = 8.7$  Hz, 2H), 7.42 (d,  $J = 8.9$  Hz, 2H), 6.62 – 6.57 (m, 1H), 3.94 (t,  $J = 6.5$  Hz, 2H), 3.12 – 3.09 (m, 2H), 1.31 (s, 9H);  $^{13}\text{C}$  NMR ( $\text{CDCl}_3$ , 101 MHz)  $\delta$ : 164.8, 148.9, 142.9 (q,  $J = 4.9$  Hz), 136.3, 126.0, 123.6 (q,  $J = 270.3$  Hz), 119.8, 118.5 (q,  $J = 35.5$  Hz), 45.6 (d,  $J = 0.9$  Hz), 34.6, 31.4, 22.2 (d,  $J = 0.8$  Hz);  $^{19}\text{F}$  NMR ( $\text{CDCl}_3$ , 377 MHz)  $\delta$ : -60.8 (t,  $J = 3.8$  Hz, 3F); TOF-HRMS Calcd. for  $\text{C}_{16}\text{H}_{19}\text{NOF}_3$  [ $\text{M}+\text{H}^+$ ]: 298.1413, found 298.1410.

(*E*)-1-(3-nitrophenyl)-3-(2,2,2-trifluoroethylidene)pyrrolidin-2-one (**1j**)

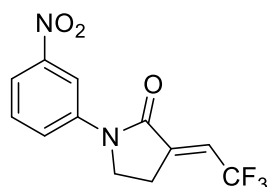

Yellow solid; Yield: 77%; (PE/EA = 6/1);  $^1\text{H}$  NMR ( $\text{CDCl}_3$ , 400 MHz)  $\delta$ : 8.48 (t,  $J = 2.2$  Hz, 1H), 8.29 (ddd,  $J = 8.3, 2.2, 0.7$  Hz, 1H), 8.06 (ddd,  $J = 8.2, 2.1, 0.7$  Hz, 1H), 7.59 (t,  $J = 8.3$  Hz, 1H), 6.67 – 6.51 (m, 1H), 4.03 (t,  $J = 6.5$  Hz, 2H), 3.21 – 3.16 (m, 2H);  $^{13}\text{C}$  NMR ( $\text{CDCl}_3$ , 101 MHz)  $\delta$ : 165.3, 148.6, 141.6, 139.8, 130.0, 125.4, 123.2 (q,  $J = 271.9$  Hz), 120.0, 119.9 (q,  $J = 36.0$  Hz), 114.0, 45.3, 21.9;  $^{19}\text{F}$  NMR ( $\text{CDCl}_3$ , 377 MHz)  $\delta$ : -61.0 (t,  $J = 3.4$  Hz, 3F); TOF-HRMS Calcd. for  $\text{C}_{12}\text{H}_8\text{N}_2\text{O}_3\text{F}_3$  [ $\text{M}-\text{H}^+$ ]: 285.0492,

found 285.0490.

*(E)*-1-(3,5-dimethylphenyl)-3-(2,2,2-trifluoroethylidene)pyrrolidin-2-one (**1k**)

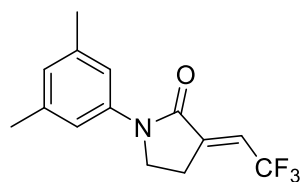

White solid; Yield: 66%; (PE/EA = 10/1); <sup>1</sup>H NMR (CDCl<sub>3</sub>, 400 MHz) δ: 7.34 – 7.29 (m, 2H), 6.89 – 6.84 (m, 1H), 6.62 – 6.54 (m, 1H), 3.92 (t, *J* = 6.9 Hz, 2H), 3.12 – 3.05 (m, 2H), 2.33 (s, 6H); <sup>13</sup>C NMR (CDCl<sub>3</sub>, 101 MHz) δ: 164.8, 143.0 (q, *J* = 5.0 Hz), 138.9, 138.7, 127.7, 123.6 (q, *J* = 270.3 Hz), 118.4 (q, *J* = 35.6 Hz), 118.1, 45.8, 22.2, 21.6; <sup>19</sup>F NMR (CDCl<sub>3</sub>, 377 MHz) δ: -60.8 (t, *J* = 4.1 Hz, 3F); TOF-HRMS Calcd. for C<sub>14</sub>H<sub>15</sub>NOF<sub>3</sub> [M+H<sup>+</sup>]: 270.1100, found 270.1198.

*(E)*-1-(3,4-dimethylphenyl)-3-(2,2,2-trifluoroethylidene)pyrrolidin-2-one (**1l**)

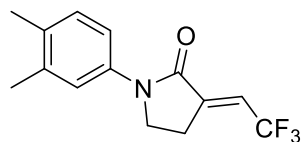

White solid; Yield: 80%; (PE/EA = 20/1); <sup>1</sup>H NMR (CDCl<sub>3</sub>, 400 MHz) δ: 7.50 (s, 1H), 7.38 (d, *J* = 8.2 Hz, 1H), 7.15 (d, *J* = 8.2 Hz, 1H), 6.61 – 6.54 (m, 1H), 3.92 (t, *J* = 6.7 Hz, 2H), 3.11 – 3.07 (m, 2H); 2.26 (d, *J* = 12.8 Hz, 6H); <sup>13</sup>C NMR (CDCl<sub>3</sub>, 101 MHz) δ: 164.7, 143.1 (q, *J* = 5.1 Hz), 137.5, 136.6, 134.4, 130.1, 123.6 (q, *J* = 270.3 Hz), 121.4, 118.2 (q, *J* = 35.5 Hz), 117.6, 45.7 (d, *J* = 1.01 Hz), 22.2 (d, *J* = 1.0 Hz), 20.1, 19.3; <sup>19</sup>F NMR (CDCl<sub>3</sub>, 377 MHz) δ: -60.8 (t, *J* = 3.8 Hz, 3F); TOF-HRMS Calcd. for C<sub>14</sub>H<sub>15</sub>NOF<sub>3</sub> [M+H<sup>+</sup>]: 270.1100, found 270.1198.

*(E)*-1-(3,5-dimethoxyphenyl)-3-(2,2,2-trifluoroethylidene)pyrrolidin-2-one (**1m**)

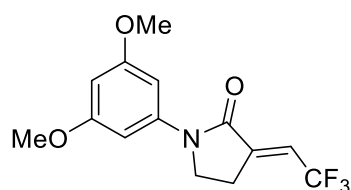

Yellow solid; Yield: 82%; (PE/EA = 4/1); <sup>1</sup>H NMR (CDCl<sub>3</sub>, 400 MHz) δ: 7.70 (d, *J* = 2.5 Hz, 1H), 6.93 (dd, *J* = 8.7, 2.5 Hz, 1H), 6.86 (d, *J* = 8.7 Hz, 1H), 6.61 – 6.53 (m, 1H), 3.93 (t, *J* = 6.2 Hz, 2H), 3.90 (s, 3H), 3.88 (s, 3H), 3.13 – 3.08 (m, 2H); <sup>13</sup>C NMR (CDCl<sub>3</sub>, 101 MHz) δ: 164.7, 149.1, 147.0, 142.9 (d, *J* = 5.1 Hz), 132.5, 123.6 (q, *J* = 270.2 Hz), 118.3 (q, *J* = 35.6 Hz), 111.7, 111.0, 104.9, 56.1 (d, *J* = 5.05 Hz), 45.9, 22.1; <sup>19</sup>F NMR (CDCl<sub>3</sub>, 377 MHz) δ: -60.6 – -61.2 (m, 3F); TOF-HRMS Calcd. for C<sub>14</sub>H<sub>15</sub>NO<sub>3</sub>F<sub>3</sub> [M+H<sup>+</sup>]: 302.0998, found 302.1001.

*(E)*-1-(3,5-dichlorophenyl)-3-(2,2,2-trifluoroethylidene)pyrrolidin-2-one (**1n**)

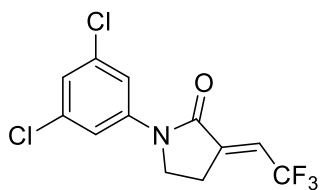

White solid; Yield: 64%; (PE/EA = 10/1);  $^1\text{H}$  NMR ( $\text{CDCl}_3$ , 600 MHz)  $\delta$ : 7.71 (d,  $J = 1.7$  Hz, 2H), 7.21 (t,  $J = 1.6$  Hz, 1H), 6.65 – 6.60(m, 1H),, 3.91 (t,  $J = 6.6$  Hz, 2H), 3.15 – 3.12 (m, 2H);  $^{13}\text{C}$  NMR ( $\text{CDCl}_3$ , 101 MHz)  $\delta$ : 165.1 , 141.8 (d,  $J = 5.1$  Hz), 140.6, 135.5, 125.5, 123.3 (q,  $J = 270.5$  Hz), 119. 8 (q,  $J = 35.8$  Hz), 117. 9, 45.3, 21.9;  $^{19}\text{F}$  NMR ( $\text{CDCl}_3$  , 377 MHz)  $\delta$ : -61.0 (t,  $J = 3.8$  Hz, 3F); TOF-HRMS Calcd. for  $\text{C}_{12}\text{H}_9\text{NOF}_3\text{Cl}_2$  [ $\text{M}+\text{H}^+$ ]: 310.0007, found 310.0005.

(*E*)-1-(3,4-dichlorophenyl)-3-(2,2,2-trifluoroethylidene)pyrrolidin-2-one (**1o**)

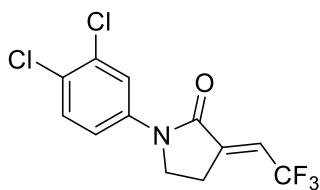

White solid; Yield: 65 %; (PE/EA = 10/1);  $^1\text{H}$  NMR ( $\text{CDCl}_3$ , 400 MHz)  $\delta$ : 7.90 (d,  $J = 2.6$  Hz, 1H), 7.64 (dd,  $J = 8.9, 2.6$  Hz, 1H), 7.45 (d,  $J = 8.9$  Hz, 1H), 6.64 – 6.57 (m, 1H), 3.91 (t,  $J = 6.9$  Hz, 2H), 3.15 – 3.10 (m, 2H);  $^{13}\text{C}$  NMR ( $\text{CDCl}_3$ , 101 MHz)  $\delta$ : 165.0, 141.8 (q,  $J = 5.0$  Hz), 138.2, 133.0, 130.6, 129.0, 123.2 (q,  $J = 270.7$  Hz), 121.3, 119.4 (q,  $J = 35.9$  Hz), 118.7, 45.2, 21.9;  $^{19}\text{F}$  NMR ( $\text{CDCl}_3$ , 377 MHz)  $\delta$ : -61.0 (t,  $J = 3.4$  Hz, 3F); TOF-HRMS Calcd. for  $\text{C}_{12}\text{H}_9\text{NOF}_3\text{Cl}_2$  [ $\text{M}+\text{H}^+$ ]: 310.0007, found 310.0005.

(*E*)-1-(naphthalen-1-yl)-3-(2,2,2-trifluoroethylidene)pyrrolidin-2-one (**1p**)

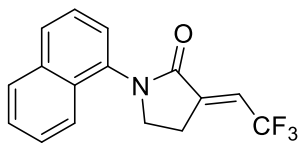

White solid; Yield: 66%; (PE/EA = 10/1);  $^1\text{H}$  NMR ( $\text{CDCl}_3$ , 400 MHz)  $\delta$ : 7.94 – 7.85 (m, 2H), 7.70 – 7.63 (m, 1H), 7.57 – 7.48 (m, 3H), 7.41 (dd,  $J = 7.3, 1.2$  Hz, 1H), 6.71 – 6.23 (m, 1H), 3.97 (t,  $J = 6.2$  Hz, 2H), 3.31 – 3.26 (m, 2H);  $^{13}\text{C}$  NMR ( $\text{CDCl}_3$ , 101 MHz)  $\delta$ : 166.0, 142.0 (q,  $J = 5.1$  Hz), 134.8, 134. 7, 129.2, 129.2, 128.8, 127.2, 126.7, 125. 7, 124.9, 124.5, 123.6 (q,  $J = 274.4$  Hz) 122.5, 119.0 (q,  $J = 35.6$  Hz), 48.8, 23.4;  $^{19}\text{F}$  NMR ( $\text{CDCl}_3$  , 377 MHz)  $\delta$ : -60.9 (t,  $J = 3.8$  Hz, 3F); TOF-HRMS Calcd. for  $\text{C}_{16}\text{H}_{13}\text{NOF}_3$  [ $\text{M}+\text{H}^+$ ]: 292.0943, found 292.0946.

(*E*)-1-methyl-3-(2,2,2-trifluoroethylidene)pyrrolidin-2-one (**1q**)

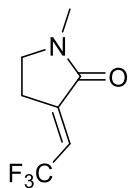

Colorless oil; Yield: 74% (PE/EA = 5/1);  $^1\text{H}$  NMR (600 MHz, Chloroform-*d*)  $\delta$  6.36 (qt,  $J = 8.44, 3.06$  Hz, 1H), 3.42 (t,  $J = 6.24$  Hz, 2H), 2.93 (s, 3H), 2.92 – 2.87 (m, 2H).  $^{13}\text{C}$  NMR (151 MHz, Chloroform-*d*)  $\delta$  166.0, 142.3 –

142.0 (m), 123.6 (q,  $J = 270.17$  Hz), 117.3 (q,  $J = 35.46$  Hz), 46.5, 22.4.  $^{19}\text{F}$  NMR (CDCl<sub>3</sub>, 376 MHz)  $\delta$ : -61.1 (s, 3F); TOF-HRMS Calcd. for C<sub>7</sub>H<sub>9</sub>F<sub>3</sub>NO [M+H<sup>+</sup>]: 180.0631, found 180.0626.

*(E)*-1-benzyl-3-(2,2,2-trifluoroethylidene)pyrrolidin-2-one (**1r**)

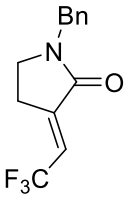 Colorless oil; Yield: 68% (PE/EA = 10/1);  $^1\text{H}$  NMR (600 MHz, Chloroform-*d*)  $\delta$  7.33 (t,  $J = 7.25$  Hz, 2H), 7.29 (t,  $J = 7.25$  Hz, 1H), 7.24 (d,  $J = 6.89$  Hz, 2H), 6.52 (dtd,  $J = 11.60, 8.37, 3.20$  Hz, 1H), 4.57 (s, 2H), 3.41 – 3.26 (m, 2H), 2.92 (tt,  $J = 6.78, 3.44$  Hz, 2H).  $^{13}\text{C}$  NMR (151 MHz, Chloroform-*d*)  $\delta$  165.8, 142.3 (t,  $J = 5.48$  Hz), 135.5, 128.9, 128.4, 128.1, 123.5 (q,  $J = 270.44$  Hz), 118.0 (q,  $J = 35.78$  Hz), 47.6, 43.8, 22.4.  $^{19}\text{F}$  NMR (CDCl<sub>3</sub>, 565 MHz)  $\delta$ : -60.7 (s, 3F); TOF-HRMS Calcd. for C<sub>13</sub>H<sub>13</sub>F<sub>3</sub>NO [M+H<sup>+</sup>]: 256.0944, found 256.0946.

*tert*-butyl *(E)*-2-oxo-3-(2,2,2-trifluoroethylidene)pyrrolidine-1-carboxylate (**1s**)

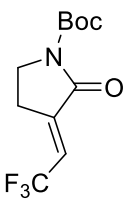 White solid; Yield: 80% (PE/EA = 20/1);  $^1\text{H}$  NMR (600 MHz, Chloroform-*d*)  $\delta$  6.64 – 6.56 (m, 1H), 3.89 – 3.63 (m, 2H), 2.94 (tt,  $J = 6.92, 3.44$  Hz, 2H), 1.53 (s, 9H).  $^{13}\text{C}$  NMR (151 MHz, Chloroform-*d*)  $\delta$  164.5, 123.0 (d,  $J = 270.63$  Hz), 120.9 (q,  $J = 35.81$  Hz), 43.2, 28.0, 21.4.  $^{19}\text{F}$  NMR (CDCl<sub>3</sub>, 377 MHz)  $\delta$ : -60.9 (t,  $J = 3.8$  Hz, 3F);  $^{19}\text{F}$  NMR (565 MHz, Chloroform-*d*)  $\delta$ : -61.1 (s, 3F); TOF-HRMS Calcd. for C<sub>7</sub>H<sub>7</sub>F<sub>3</sub>NO<sub>3</sub> [M+H<sup>+</sup>]: 210.0373, found 210.0365.

*(E)*-3-(2,2,2-trifluoroethylidene)pyrrolidin-2-one (**1t**)

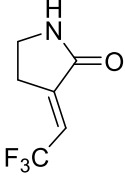 Brown solid; Yield: 69% (PE/EA = 3/1);  $^1\text{H}$  NMR (600 MHz, Chloroform-*d*)  $\delta$  8.32 (s, 1H), 6.41 (qt,  $J = 8.30, 3.12$  Hz, 1H), 3.50 (t,  $J = 6.27$  Hz, 2H), 3.02 (tp,  $J = 6.88, 3.45$  Hz, 2H).  $^{13}\text{C}$  NMR (151 MHz, Chloroform-*d*)  $\delta$  169.8, 142.2 (q,  $J = 5.03$  Hz), 123.4 (q,  $J = 270.29$  Hz), 117.8 (q,  $J = 35.63$  Hz), 39.7, 24.3.  $^{19}\text{F}$  NMR (CDCl<sub>3</sub>, 565 MHz)  $\delta$ : -61.1 (s, 3F); TOF-HRMS Calcd. for C<sub>6</sub>H<sub>7</sub>F<sub>3</sub>NO [M+H<sup>+</sup>]: 166.0474, found 166.0476.

1-phenyl-3-(2,2,2-trifluoroethyl)-1,5-dihydro-2H-pyrrol-2-one (**1u**)

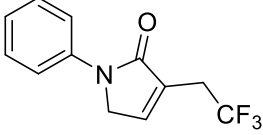 White solid; NMR (CDCl<sub>3</sub>, 400 MHz)  $\delta$ : 7.73 – 7.70 (m, 2H), 7.40 – 7.36 (m, 2H), 7.17 – 7.13 (m, 2H), 4.43– 4.41 (m, 2H), 3.24 – 3.18 (m, 2H);  $^{13}\text{C}\{^1\text{H}\}$  NMR (CDCl<sub>3</sub>, 151 MHz)  $\delta$ : 168.8,

139.0, 138.76, 130.7, 129.3, 125.6 (q,  $J = 277.8$  Hz), 124.6, 118.8, 51.56, 30.4 (q,  $J = 31.7$  Hz);  $^{19}\text{F}$  NMR ( $\text{CDCl}_3$ , 565 MHz)  $\delta$ : 64.9 (t,  $J = 5.6$  Hz, 3F); TOF-HRMS Calcd. for  $\text{C}_{16}\text{H}_{13}\text{NOF}_3$  [ $\text{M}+\text{H}^+$ ]: 292.0943, found 292.0946.

*(E)*-1-phenyl-3-(2,2,2-trifluoroethylidene)piperidin-2-one (**3a**)

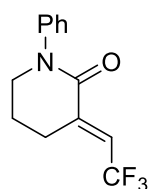

White solid; Yield: 77%; (PE/EA = 12/1);  $^1\text{H}$  NMR (600 MHz, Chloroform-*d*)  $\delta$  7.45 – 7.37 (m, 2H), 7.32 – 7.24 (m, 3H), 6.96 – 6.87 (m, 1H), 3.76 (td,  $J = 5.52, 0.98$  Hz, 2H), 2.97 – 2.84 (m, 2H), 2.14 – 1.99 (m, 2H).  $^{13}\text{C}$  NMR (151 MHz, Chloroform-*d*)  $\delta$  162.0, 143.0, 140.8 (d,  $J = 5.11$  Hz), 129.3, 127.3, 125.8, 126.8 (q,  $J = 34.7$  Hz) 125.9 (d,  $J = 271.8$  Hz), 25.6, 22.5.  $^{19}\text{F}$  NMR (565 MHz, Chloroform-*d*)  $\delta$  -58.6 (s, 3F); TOF-HRMS Calcd. for  $\text{C}_{13}\text{H}_{13}\text{F}_3\text{NO}$  [ $\text{M}+\text{H}^+$ ]: 256.0944, found 256.0947.

*(E)*-1-(*o*-tolyl)-3-(2,2,2-trifluoroethylidene)piperidin-2-one (**3b**)

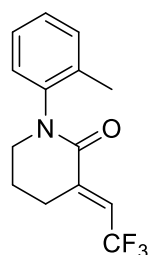

White solid; Yield: 83%; (PE/EA = 20/1);  $^1\text{H}$  NMR (400 MHz, Chloroform-*d*)  $\delta$  7.32 – 7.20 (m, 3H), 7.17 – 7.06 (m, 1H), 6.91 (qt,  $J = 8.9, 2.2$  Hz, 1H), 3.71 (ddd,  $J = 12.4, 7.3, 4.7$  Hz, 1H), 3.60 – 3.47 (m, 1H), 3.04 – 2.81 (m, 2H), 2.20 (s, 3H), 2.07 (ddt,  $J = 9.8, 7.5, 5.1$  Hz, 2H).  $^{13}\text{C}$  NMR (101 MHz, Chloroform-*d*)  $\delta$  161.5, 141.8, 140.6 (d,  $J = 5.07$  Hz), 134.8, 131.3, 128.2, 127.4, 126.5, 124.8, 123.6 (q,  $J = 34.3$  Hz), 123.4 (d,  $J = 272.7$  Hz), 51.1, 25.7, 22.6, 17.6.  $^{19}\text{F}$  NMR (376 MHz, Chloroform-*d*)  $\delta$  -58.5 (s, 3F); TOF-HRMS Calcd. for  $\text{C}_{14}\text{H}_{15}\text{F}_3\text{NO}$  [ $\text{M}+\text{H}^+$ ]: 270.1100, found 270.1096.

*(E)*-1-(*m*-tolyl)-3-(2,2,2-trifluoroethylidene)piperidin-2-one (**3c**)

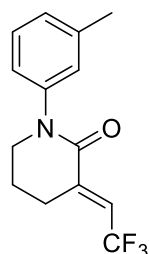

White solid; Yield: 82%; (PE/EA = 12/1);  $^1\text{H}$  NMR (400 MHz, Chloroform-*d*)  $\delta$  7.29 (t,  $J = 7.73$  Hz, 1H), 7.16 – 7.01 (m, 3H), 6.97 – 6.86 (m, 1H), 3.80 – 3.65 (m, 2H), 2.89 (ddt,  $J = 8.98, 4.70, 2.35$  Hz, 2H), 2.36 (s, 3H), 2.05 (dq,  $J = 7.60, 6.04$  Hz, 2H).  $^{13}\text{C}$  NMR (101 MHz, Chloroform-*d*)  $\delta$  162.0, 142.9, 140.8 (q,  $J = 5.0$  Hz), 139.3, 129.2, 128.2, 126.6, 123.7 (q,  $J = 35.3$  Hz) 123.5 (d,  $J = 272.7$  Hz), 122.8, 51.5, 25.6, 21.4.  $^{19}\text{F}$  NMR (376 MHz, Chloroform-*d*)  $\delta$  -58.6 (s, 3F); TOF-HRMS Calcd. for  $\text{C}_{14}\text{H}_{15}\text{F}_3\text{NO}$  [ $\text{M}+\text{H}^+$ ]: 270.1100, found 270.1096.

(*E*)-1-(3-bromophenyl)-3-(2,2,2-trifluoroethylidene)piperidin-2-one (**3d**)

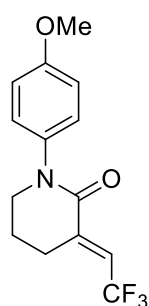

White solid; Yield: 79%; (PE/EA = 15/1);  $^1\text{H}$  NMR (600 MHz, Chloroform-*d*)  $\delta$  7.20 – 7.12 (m, 2H), 6.95 – 6.83 (m, 3H), 3.80 (d,  $J$  = 1.23 Hz, 3H), 3.72 (dd,  $J$  = 6.52, 4.98 Hz, 2H), 2.89 (ddt,  $J$  = 9.09, 4.91, 2.37 Hz, 2H), 2.09 – 1.98 (m, 2H).  $^{13}\text{C}$  NMR (151 MHz, Chloroform-*d*)  $\delta$  162.2, 158.5, 140.8, 135.8, 127.0, 123.7 (q,  $J$  = 34.6 Hz), 123.5 (d,  $J$  = 270.3 Hz) 114.6, 55.5, 51.7, 25.6, 22.5.  $^{19}\text{F}$  NMR (376 MHz, Chloroform-*d*)  $\delta$  -58.6 (s, 3F); TOF-HRMS Calcd. for  $\text{C}_{14}\text{H}_{15}\text{F}_3\text{NO}_2$  [ $\text{M}+\text{H}^+$ ]: 286.1049, found 286.1046.

(*E*)-1-(4-(*tert*-butyl)phenyl)-3-(2,2,2-trifluoroethylidene)piperidin-2-one (**3e**)

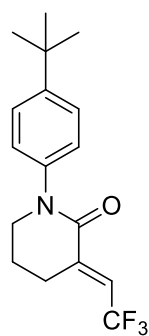

White solid; Yield: 81%; (PE/EA = 15/1);  $^1\text{H}$  NMR (400 MHz, Chloroform-*d*)  $\delta$  7.49 – 7.35 (m, 2H), 7.19 (d,  $J$  = 8.62 Hz, 2H), 6.97 – 6.85 (m, 1H), 3.75 (t,  $J$  = 5.61 Hz, 2H), 2.89 (ddt,  $J$  = 6.77, 4.62, 2.46 Hz, 2H), 2.17 – 1.96 (m, 2H), 1.31 (s, 9H).  $^{13}\text{C}$  NMR (101 MHz, Chloroform-*d*)  $\delta$  162.0, 150.1, 140.9 (d,  $J$  = 5.1 Hz), 140.3, 126.3, 125.2, 123.7 (q,  $J$  = 34.3 Hz), 123.5 (d,  $J$  = 272.7 Hz), 51.4, 34.6, 31.4, 25.6, 22.5.  $^{19}\text{F}$  NMR (376 MHz, Chloroform-*d*)  $\delta$  -58.6 (s, 3F); TOF-HRMS Calcd. for  $\text{C}_{17}\text{H}_{21}\text{F}_3\text{NO}$  [ $\text{M}+\text{H}^+$ ]: 312.1570, found 312.1570.

(*E*)-1-(2-chlorophenyl)-3-(2,2,2-trifluoroethylidene)piperidin-2-one (**3f**)

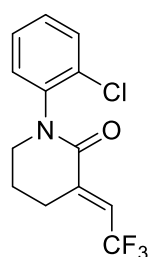

White solid; Yield: 70%; (PE/EA = 15/1);  $^1\text{H}$  NMR (400 MHz, Chloroform-*d*)  $\delta$  7.49 (dd,  $J$  = 7.32, 2.10 Hz, 1H), 7.37 – 7.27 (m, 2H), 7.27 – 7.24 (m, 1H), 6.91 (qt,  $J$  = 8.80, 2.16 Hz, 1H), 3.82 – 3.50 (m, 2H), 2.92 (dddt,  $J$  = 11.20, 7.17, 4.75, 2.31 Hz, 2H), 2.30 – 1.92 (m, 2H).  $^{13}\text{C}$  NMR (101 MHz, Chloroform-*d*)  $\delta$  161.9, 140.1, 131.9, 130.6, 129.5, 129.0, 128.2, 124.0 (q,  $J$  = 34.66 Hz), 122.0, 50.8, 25.6, 22.3.  $^{19}\text{F}$  NMR (565 MHz, Chloroform-*d*)  $\delta$  -58.6 (s, 3F); TOF-HRMS Calcd. for  $\text{C}_{13}\text{H}_{12}\text{ClF}_3\text{NO}$  [ $\text{M}+\text{H}^+$ ]: 290.0554, found 290.0556.

*(E)*-1-(3-fluorophenyl)-3-(2,2,2-trifluoroethylidene)piperidin-2-one (**3g**)

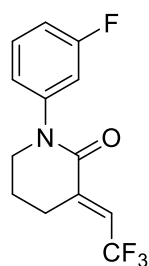

White solid; Yield: 80%; (PE/EA = 15/1);  $^1\text{H}$  NMR (400 MHz, Chloroform-*d*)  $\delta$  7.36 (td,  $J = 8.15, 6.32$  Hz, 1H), 7.11 – 6.96 (m, 3H), 6.92 (qt,  $J = 8.84, 2.28$  Hz, 1H), 3.84 – 3.64 (m, 2H), 2.90 (ddq,  $J = 9.38, 4.77, 2.38$  Hz, 2H), 2.16 – 1.98 (m, 2H).  $^{13}\text{C}$  NMR (101 MHz, Chloroform-*d*)  $\delta$  164.1, 162.0, 161.6, 144.2 (d,  $J = 9.5$  Hz), 140.5 (d,  $J = 5.1$  Hz), 130.4 (d,  $J = 9.1$  Hz), 124.4 (q,  $J = 35.3$  Hz), 123.4 (d,  $J = 281.7$  Hz), 121.4 (d,  $J = 3.3$  Hz), 113.9 (dd,  $J = 80.4, 22.2$  Hz), 51.2, 25.5, 22.4.  $^{19}\text{F}$  NMR (376 MHz, Chloroform-*d*)  $\delta$  -58.7 (s, 3F), -111.25 (s, F); TOF-HRMS Calcd. for  $\text{C}_{13}\text{H}_{12}\text{F}_4\text{NO}$  [ $\text{M}+\text{H}^+$ ]: 274.0850, found 274.0855.

*(E)*-1-(3-bromophenyl)-3-(2,2,2-trifluoroethylidene)piperidin-2-one (**3h**)

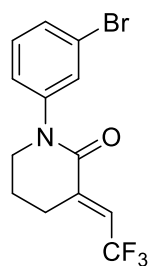

White solid; Yield: 56%; (PE/EA = 15/1);  $^1\text{H}$  NMR (400 MHz, Chloroform-*d*)  $\delta$  7.67 – 7.44 (m, 1H), 7.44 – 7.38 (m, 1H), 7.28 (t,  $J = 7.89$  Hz, 1H), 7.25 – 7.20 (m, 1H), 7.17 – 6.85 (m, 1H), 3.86 – 3.59 (m, 2H), 2.90 (tq,  $J = 7.08, 2.39$  Hz, 2H), 2.17 – 1.97 (m, 2H).  $^{13}\text{C}$  NMR (101 MHz, Chloroform-*d*)  $\delta$  162.0, 144.1, 140.4, 136.3, 134.91, 130.5 (d,  $J = 14.02$  Hz), 129.1, 124.7 (d,  $J = 120.1$  Hz), 124.5 (d,  $J = 11.0$  Hz), 122.6, 51.3, 25.5, 22.4.  $^{19}\text{F}$  NMR (376 MHz, Chloroform-*d*)  $\delta$  -58.7 (s, 3F); TOF-HRMS Calcd. for  $\text{C}_{13}\text{H}_{12}\text{BrF}_3\text{NO}$  [ $\text{M}+\text{H}^+$ ]: 334.0049, found 334.0051.

*(E)*-1-(4-bromophenyl)-3-(2,2,2-trifluoroethylidene)piperidin-2-one (**3i**)

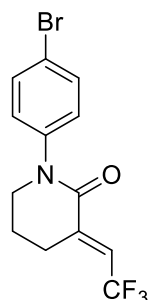

White solid; Yield: 51%; (PE/EA = 20/1);  $^1\text{H}$  NMR (400 MHz, Chloroform-*d*)  $\delta$  7.76 – 7.47 (m, 2H), 7.20 – 7.00 (m, 2H), 6.91 (qt,  $J = 8.87, 2.27$  Hz, 1H), 3.82 – 3.66 (m, 2H), 3.05 – 2.63 (m, 2H), 2.18 – 1.93 (m, 2H).  $^{13}\text{C}$  NMR (101 MHz, Chloroform-*d*)  $\delta$  162.0, 141.9, 140.5 (d,  $J = 5.0$  Hz), 138.4, 132.4, 127.5, 124.2 (q,  $J = 34.4, 33.2$  Hz), 120.7, 51.2, 25.5, 22.4.  $^{19}\text{F}$  NMR (376 MHz, Chloroform-*d*)  $\delta$  -58.7 (s, 3F); TOF-HRMS Calcd. for  $\text{C}_{13}\text{H}_{12}\text{BrF}_3\text{NO}$  [ $\text{M}+\text{H}^+$ ]: 334.0049, found 334.0051.



**(E)-1-(4-fluorophenyl)-3-(2,2,2-trifluoroethylidene)piperidin-2-one (3j)**

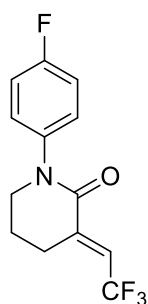

White solid; Yield: 84%; (PE/EA = 15/1); <sup>1</sup>H NMR (600 MHz, Chloroform-*d*) δ 7.27 – 7.21 (m, 2H), 7.12 – 7.06 (m, 2H), 6.91 (qt, *J* = 8.85, 2.19 Hz, 1H), 3.80 – 3.66 (m, 2H), 2.95 – 2.84 (m, 2H), 2.12 – 1.95 (m, 2H). <sup>13</sup>C NMR (101 MHz, Chloroform-*d*) δ 162.3 (d, *J* = 39.5 Hz), 160.1, 140.6, 138.9, 127.6 (d, *J* = 8.5 Hz), 124.0 (q, *J* = 35.3 Hz), 123.4 (d, *J* = 272.7 Hz), 116.2 (d, *J* = 22.7 Hz), 51.5, 25.5, 22.5. <sup>19</sup>F NMR (376 MHz, Chloroform-*d*) δ -58.7 (s, 3F), -114.2 (s, F). TOF-HRMS Calcd. for C<sub>13</sub>H<sub>15</sub>F<sub>4</sub>NO<sub>2</sub> [M+H<sup>+</sup>]: 274.0850, found 274.0855.

**(E)-1-([1,1'-biphenyl]-4-yl)-3-(2,2,2-trifluoroethylidene)piperidin-2-one (3k)**

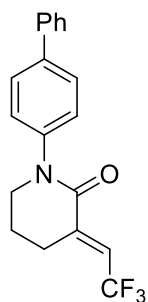

White solid; Yield: 69%; (PE/EA = 20/1); <sup>1</sup>H NMR (600 MHz, Chloroform-*d*) δ 7.62 (dd, *J* = 8.52, 2.52 Hz, 2H), 7.57 (dd, *J* = 7.49, 2.34 Hz, 2H), 7.44 (td, *J* = 7.76, 2.47 Hz, 2H), 7.35 (tq, *J* = 5.20, 2.64, 2.06 Hz, 3H), 6.94 (qt, *J* = 8.83, 2.35 Hz, 1H), 3.81 (dq, *J* = 5.85, 2.69 Hz, 2H), 2.93 (ddq, *J* = 7.50, 5.07, 2.43 Hz, 2H), 2.09 (dq, *J* = 8.47, 6.10, 2.61 Hz, 2H). <sup>13</sup>C NMR (151 MHz, Chloroform-*d*) δ 162.1, 142.1, 140.7, 140.4, 140.2, 128.9, 128.0, 127.6, 127.2, 126.0, 124.9 – 123.3 (m), 51.3, 25.6, 22.5. <sup>19</sup>F NMR (376 MHz, Chloroform-*d*) δ -58.6 (s, 3F); TOF-HRMS Calcd. for C<sub>19</sub>H<sub>17</sub>F<sub>3</sub>NO [M+H<sup>+</sup>]: 332.1257, found 334.1418.

**(E)-1-(3,4-dimethylphenyl)-3-(2,2,2-trifluoroethylidene)piperidin-2-one (3l)**

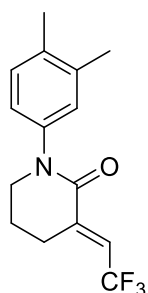

White solid; Yield: 85%; (PE/EA = 12/1); <sup>1</sup>H NMR (400 MHz, Chloroform-*d*) δ 7.16 (d, *J* = 7.98 Hz, 1H), 7.04 (d, *J* = 2.28 Hz, 1H), 6.97 (dd, *J* = 7.96, 2.34 Hz, 1H), 6.91 (qt, *J* = 8.90, 2.19 Hz, 1H), 3.80 – 3.64 (m, 2H), 2.89 (ddt, *J* = 8.95, 4.87, 2.34 Hz, 2H), 2.25 (t, *J* = 1.19 Hz, 6H), 2.05 (dq, *J* = 7.63, 6.03 Hz, 2H). <sup>13</sup>C NMR (101 MHz, Chloroform-*d*) δ 162.0, 140.9 (d, *J* = 5.30 Hz), 140.7, 137.8, 136.0, 130.5, 127.0, 123.6 (q, *J* = 34.3 Hz), 123.5 (d, *J* = 272.7 Hz), 123.0, 51.6, 25.6, 22.5, 19.9, 19.4. <sup>19</sup>F NMR (376 MHz, Chloroform-*d*) δ -58.6 (s, 3F); TOF-HRMS Calcd. for C<sub>15</sub>H<sub>17</sub>F<sub>3</sub>NO [M+H<sup>+</sup>]: 284.1257, found 284.1253.

*(E)*-1-(3,5-dimethylphenyl)-3-(2,2,2-trifluoroethylidene)piperidin-2-one (**3m**)

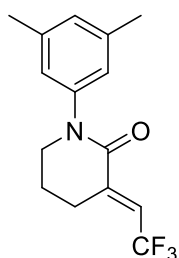

White solid; Yield: 85%; (PE/EA = 10/1);  $^1\text{H}$  NMR (400 MHz, Chloroform-*d*)  $\delta$  6.95 – 6.88 (m, 2H), 6.88 – 6.84 (m, 2H), 3.80 – 3.64 (m, 2H), 2.95 – 2.82 (m, 2H), 2.31 (d,  $J = 0.72$  Hz, 6H), 2.04 (dq,  $J = 7.63, 5.80$  Hz, 2H).  $^{13}\text{C}$  NMR (101 MHz, Chloroform-*d*)  $\delta$  162.0, 142.9, 140.8 (d,  $J = 5.0$  Hz), 139.2, 129.2, 123.7 (q,  $J = 34.3$  Hz), 123.6, 123.5 (d,  $J = 272.7$  Hz), 51.6, 25.6, 22.5, 21.3.  $^{19}\text{F}$  NMR (376 MHz, Chloroform-*d*)  $\delta$  -58.6 (s, 3F); TOF-HRMS Calcd. for  $\text{C}_{15}\text{H}_{17}\text{F}_3\text{NO}$  [ $\text{M}+\text{H}^+$ ]: 284.1257, found 284.1253.

**6. NMR, GC or SFC and HPLC, optical rotation and HRMS data of compounds 2, and 4 – 8**

1-phenyl-3-(2,2,2-trifluoroethyl)pyrrolidin-2-one (**2a**)

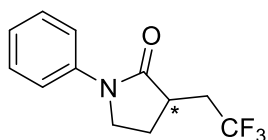

White solid; 96% yield; 97% ee;  $[\alpha]_{\text{D}}^{25} = +28.4$  ( $c = 0.5$ ,  $\text{CH}_2\text{Cl}_2$ ); SFC condition: Lux 5u Cellulose-1 (250  $\times$  4.60 mm), MeOH :  $\text{CO}_2 = 3:97$ , 2.0 mL/min, 230 nm;  $t_{\text{R}} = 6.5$  min (minor),  $t_{\text{R}} = 7.1$  min (major);  $^1\text{H}$  NMR ( $\text{CDCl}_3$ , 400 MHz)  $\delta$ : 7.51 (d,  $J = 8.3$  Hz, 2H), 7.28 (t,  $J = 7.8$  Hz, 2H), 7.07 (t,  $J = 7.5$  Hz, 1H), 3.79 – 3.67 (m, 2H), 2.91 – 2.78 (m, 2H), 2.48 – 2.42 (m, 1H), 2.12 – 2.00 (m, 1H), 1.91 – 1.81 (m, 1H);  $^{13}\text{C}$  NMR ( $\text{CDCl}_3$ , 101 MHz)  $\delta$ : 172.7, 139.1, 128.9, 126.9 (d,  $J = 276.5$  Hz), 124.9, 119.8, 46.7, 38.3 (d,  $J = 2.5$  Hz), 35.6 (q,  $J = 29.3$  Hz), 25.8;  $^{19}\text{F}$  NMR ( $\text{CDCl}_3$ , 377 MHz)  $\delta$ : -64.9 (t,  $J = 10.8$  Hz, 3F); TOF-HRMS Calcd. for  $\text{C}_{12}\text{H}_{13}\text{NOF}_3$  [ $\text{M}+\text{H}^+$ ]: 244.0943, found 244.0941.

1-(*m*-tolyl)-3-(2,2,2-trifluoroethyl)pyrrolidin-2-one (**2b**)

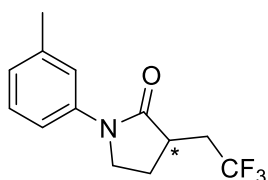

White solid; 95% yield; 99.9% ee;  $[\alpha]_{\text{D}}^{25} = +26.4$  ( $c = 0.5$ ,  $\text{CH}_2\text{Cl}_2$ ); SFC condition: Lux 5u Cellulose-1 (250  $\times$  4.60 mm), MeOH :  $\text{CO}_2 = 10:90$ , 3.0 mL/min, 230 nm;  $t_{\text{R}} = 2.2$  min (minor),  $t_{\text{R}} = 2.4$  min (major);  $^1\text{H}$  NMR ( $\text{CDCl}_3$ , 400 MHz)  $\delta$ : 7.44 (s, 1H), 7.36 (d,  $J = 8.0$  Hz, 1H), 7.28 – 7.23 (m, 1H), 6.98 (d,  $J = 7.5$  Hz, 1H), 3.86 – 3.75 (m, 2H), 3.03 – 2.85 (m, 2H), 2.56 – 2.49 (m, 1H), 2.36 (s, 3H), 2.20 – 2.08 (m, 1H), 1.98 – 1.86 (m, 1H);  $^{13}\text{C}$  NMR ( $\text{CDCl}_3$ , 101 MHz)  $\delta$ : 172.8, 139.1, 138.9, 128.8, 127.2

(q,  $J = 275$  Hz), 125.7, 120.76, 117.1, 46.9, 38.4 (q,  $J = 2.7$  Hz), 35.6 (q,  $J = 29.0$  Hz), 25.9, 21.7;  $^{19}\text{F}$  NMR ( $\text{CDCl}_3$ , 377 MHz)  $\delta$ : -64.9 (t,  $J = 10.7$  Hz, 3F); TOF-HRMS Calcd. for  $\text{C}_{13}\text{H}_{14}\text{NOF}_3\text{Na}$  [ $\text{M}+\text{Na}^+$ ]: 280.0919, found 280.0918.

1-(3-methoxyphenyl)-3-(2,2,2-trifluoroethyl)pyrrolidin-2-one (**2c**)

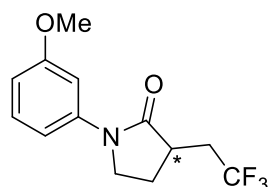

White solid; 94% yield; 99.9% ee;  $[\alpha]_{\text{D}}^{25} = +20.6$  ( $c = 0.5$ ,  $\text{CH}_2\text{Cl}_2$ ); SFC condition: Lux 5u Cellulose-1 ( $250 \times 4.60$  mm), MeOH :  $\text{CO}_2 = 5:95$ , 3.0 mL/min, 230 nm;  $t_{\text{R}} = 4.4$  min (minor),  $t_{\text{R}} = 4.6$  min (major);  $^1\text{H}$  NMR ( $\text{CDCl}_3$ , 400 MHz)  $\delta$ : 7.35 (t,  $J = 2.3$  Hz, 1H), 7.27 (d,  $J = 8.2$  Hz, 1H), 7.10 (ddd,  $J = 8.2, 2.1, 0.9$  Hz, 1H), 6.72 (ddd,  $J = 8.3, 2.5, 0.8$  Hz, 1H), 3.85 – 3.79 (m, 5H), 3.00 – 2.86 (m, 2H), 2.56 – 2.49 (m, 1H), 2.20 – 2.06 (m, 1H), 2.00 – 1.88 (m, 1H);  $^{13}\text{C}$  NMR ( $\text{CDCl}_3$ , 101 MHz)  $\delta$ : 172.9, 160.0, 140.3, 129.6, 126.9 (q,  $J = 276.6$  Hz), 111.8, 110.6, 105.9, 55.4, 46.8, 35.5 (q,  $J = 28.9$  Hz), 25.8;  $^{19}\text{F}$  NMR ( $\text{CDCl}_3$ , 377 MHz)  $\delta$ : -64.9 (t,  $J = 10.6$  Hz, 3F); TOF-HRMS Calcd. for  $\text{C}_{13}\text{H}_{15}\text{NO}_2\text{F}_3$  [ $\text{M}+\text{H}^+$ ]: 274.1049, found 274.1052.

1-(*p*-tolyl)-3-(2,2,2-trifluoroethyl)pyrrolidin-2-one (**2d**)

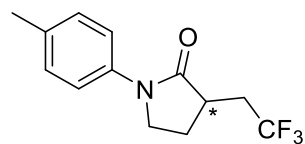

White solid; 96% yield; 99.5% ee;  $[\alpha]_{\text{D}}^{25} = +27.6$  ( $c = 1.0$ ,  $\text{CH}_2\text{Cl}_2$ ); SFC condition: Lux 5u Cellulose-1 ( $250 \times 4.60$  mm), MeOH :  $\text{CO}_2 = 10:90$ , 3.0 mL/min, 254 nm;  $t_{\text{R}} = 2.2$  min (minor),  $t_{\text{R}} = 2.4$  min (major);  $^1\text{H}$  NMR ( $\text{CDCl}_3$ , 400 MHz)  $\delta$ : 7.47 (d,  $J = 8.4$  Hz, 2H), 7.17 (d,  $J = 8.3$  Hz, 2H), 3.85 – 3.74 (m, 2H), 3.04 – 2.84 (m, 2H), 2.60 – 2.49 (m, 1H), 2.32 (s, 3H), 2.17 – 2.08 (m, 1H), 1.99 – 1.88 (m, 1H);  $^{13}\text{C}$  NMR ( $\text{CDCl}_3$ , 101 MHz)  $\delta$ : 172.7, 136.6, 134.7, 129.6, 127.0 (q,  $J = 276.3$  Hz), 112.0, 46.9, 38.3, 35.7 (q,  $J = 29.1$  Hz), 25.9, 21.0;  $^{19}\text{F}$  NMR ( $\text{CDCl}_3$ , 377 MHz)  $\delta$ : -64.9 (t,  $J = 10.8$  Hz, 3F); TOF-HRMS Calcd. for  $\text{C}_{13}\text{H}_{14}\text{NOF}_3\text{Na}$  [ $\text{M}+\text{Na}^+$ ]: 280.0919, found 280.0918.

1-(4-methoxyphenyl)-3-(2,2,2-trifluoroethyl)pyrrolidin-2-one (**2e**)

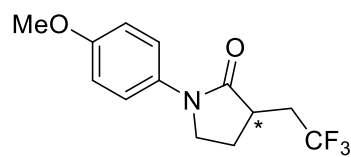

White solid; 97% yield; 99.9% ee;  $[\alpha]_{\text{D}}^{25} = +11.1$  ( $c = 0.5$ ,  $\text{CH}_2\text{Cl}_2$ ); SFC condition: Lux 5u Cellulose-1 ( $250 \times 4.60$  mm), MeOH :  $\text{CO}_2 = 10:90$ , 3.0 mL/min, 254 nm;  $t_{\text{R}} = 2.8$  min (minor),  $t_{\text{R}} = 3.0$  min (major);  $^1\text{H}$  NMR ( $\text{CDCl}_3$ , 400 MHz)  $\delta$ : 7.48 (d,  $J = 8.5$  Hz,

2H), 6.90 (d,  $J = 8.7$  Hz, 2H), 3.84– 3.71 (m, 2H), 3.79 (s, 3H), 3.03 – 2.84 (m, 2H), 2.55 – 2.48 (m, 1H), 2.19 – 2.08 (m, 1H), 1.99 – 1.89 (m, 1H);  $^{13}\text{C}$  NMR ( $\text{CDCl}_3$ , 101 MHz)  $\delta$ : 172.5, 156.9, 132.4, 127.0 (q,  $J = 279.6$  Hz), 121.7, 114.2, 55.6, 47.2, 38.2, 35.7 (q,  $J = 29.0$  Hz), 26.0;  $^{19}\text{F}$  NMR ( $\text{CDCl}_3$ , 377 MHz)  $\delta$ : -64.9 (t,  $J = 10.7$  Hz, 3F); TOF-HRMS Calcd. for  $\text{C}_{13}\text{H}_{15}\text{NO}_2\text{F}_3$  [ $\text{M}+\text{H}^+$ ]: 274.1049, found 274.1052.

1-(3-fluorophenyl)-3-(2,2,2-trifluoroethyl)pyrrolidin-2-one (**2f**)

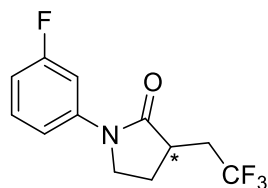

White solid; 94% yield; 99.9% ee;  $[\alpha]_{\text{D}}^{25} = +15.9$  ( $c = 0.5$ ,  $\text{CH}_2\text{Cl}_2$ ); SFC condition: Lux 5u Cellulose-1 (250  $\times$  4.60 mm), MeOH :  $\text{CO}_2 = 10:90$ , 3.0 mL/min, 210 nm;  $t_{\text{R}} = 2.6$  min (major),  $t_{\text{R}} = 2.8$  min (minor);  $^1\text{H}$  NMR ( $\text{CDCl}_3$ , 400 MHz)  $\delta$ : 7.51 (dt,  $J = 11.3, 2.3$  Hz, 1H), 7.35 – 7.31 (m, 2H), 6.89 – 6.84 (m, 1H), 3.85 – 3.77 (m, 2H), 3.03 – 2.87 (m, 2H), 2.58 – 2.51 (m, 1H), 2.21 – 2.09 (m, 1H), 2.01 – 1.90 (m, 1H);  $^{13}\text{C}$  NMR ( $\text{CDCl}_3$ , 101 MHz)  $\delta$ : 173.0, 163.0 (d,  $J = 245.1$  Hz), 140.6 (d,  $J = 10.5$  Hz), 130.1 (d,  $J = 9.3$  Hz), 126.9 (q,  $J = 276.5$  Hz), 114.8 (d,  $J = 3.1$  Hz), 111.6 (d,  $J = 21.2$  Hz), 107.2 (d,  $J = 26.3$  Hz), 46.7, 38.5 (q,  $J = 2.7$  Hz), 35.5 (q,  $J = 29.2$  Hz), 25.7;  $^{19}\text{F}$  NMR ( $\text{CDCl}_3$ , 376 MHz)  $\delta$ : -64.9 (t,  $J = 11.3$  Hz, 3F), -111.16 (s, 1F); TOF-HRMS Calcd. for  $\text{C}_{12}\text{H}_{12}\text{NOF}_4$  [ $\text{M}+\text{H}^+$ ]: 262.0849, found 262.0847.

1-(4-fluorophenyl)-3-(2,2,2-trifluoroethyl)pyrrolidin-2-one (**2g**)

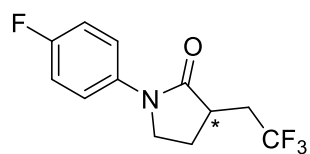

White solid; 96% yield; 96% ee;  $[\alpha]_{\text{D}}^{25} = +25.2$  ( $c = 0.5$ ,  $\text{CH}_2\text{Cl}_2$ ); HPLC condition: Lux 5u Cellulose-2 (250  $\times$  4.60 mm), ipa:hex = 10:90, 1.0 mL/min, 210 nm;  $t_{\text{R}} = 8.5$  min (major),  $t_{\text{R}} = 8.9$  min (minor);  $^1\text{H}$  NMR ( $\text{CDCl}_3$ , 400 MHz)  $\delta$ : 7.56 (dd,  $J = 9.0, 4.8$  Hz, 2H), 7.06 (t,  $J = 8.6$  Hz, 2H), 3.86– 3.78 (m, 2H), 3.03 – 2.85 (m, 2H), 2.57 – 2.50 (m, 1H), 2.20 – 2.06 (m, 1H), 2.00 – 1.90 (m, 1H);  $^{13}\text{C}$  NMR ( $\text{CDCl}_3$ , 101 MHz)  $\delta$ : 171.8, 158.8 (q,  $J = 245.4$  Hz), 134.3 (d,  $J = 2.9$  Hz), 125.9 (q,  $J = 276.4$  Hz), 120.7 (d,  $J = 7.9$  Hz), 114.7 (d,  $J = 22.4$  Hz), 46.0, 37.2 (q,  $J = 2.6$  Hz), 34.6 (q,  $J = 29.0$  Hz), 24.8;  $^{19}\text{F}$  NMR ( $\text{CDCl}_3$ , 377 MHz)  $\delta$ : -64.9 (t,  $J = 10.6$  Hz, 3F), -113.28 – -126.39 (m, 1F); TOF-HRMS Calcd. for  $\text{C}_{12}\text{H}_{12}\text{NOF}_4$  [ $\text{M}+\text{H}^+$ ]: 262.0849, found 262.0847.

1-(3-bromophenyl)-3-(2,2,2-trifluoroethyl)pyrrolidin-2-one (**2h**)

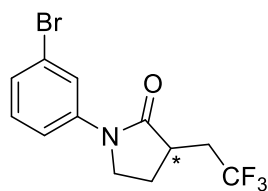

White solid; 95% yield; 99.9% ee;  $[\alpha]_D^{25} = +21.7$  ( $c = 1.0$ ,  $\text{CH}_2\text{Cl}_2$ ); SFC condition: Lux 5u Cellulose-1 ( $250 \times 4.60$  mm),  $\text{MeOH} : \text{CO}_2 = 10:90$ , 3.0 mL/min, 230 nm;  $t_R = 2.9$  min (minor),  $t_R = 3.1$  min (major);  $^1\text{H NMR}$  ( $\text{CDCl}_3$ , 400 MHz)  $\delta$ : 7.80 (t,  $J = 2.0$  Hz, 1H), 7.58 (ddd,  $J = 8.1, 2.1, 1.1$  Hz, 1H), 7.31 – 7.27 (ddd,  $J = 8.0, 1.7, 1.2$  Hz, 1H), 7.22 (t,  $J = 8.0$  Hz, 1H), 3.85 – 3.74 (m, 2H), 3.02 – 2.86 (m, 2H), 2.58 – 2.51 (m, 1H), 2.20 – 2.06 (m, 1H), 2.00 – 1.89 (m, 1H);  $^{13}\text{C NMR}$  ( $\text{CDCl}_3$ , 101 MHz)  $\delta$ : 172.9, 140.3, 130.2, 126.8 (q,  $J = 277.8$  Hz), 127.8, 122.7, 122.5, 118.1, 46.6, 38.3 (q,  $J = 2.6$  Hz), 35.4 (q,  $J = 29.1$  Hz), 25. 7;  $^{19}\text{F NMR}$  ( $\text{CDCl}_3$ , 377 MHz)  $\delta$ : -64.9 (t,  $J = 10.6$  Hz, 3F); TOF-HRMS Calcd. for  $\text{C}_{12}\text{H}_{12}\text{NOF}_3\text{Br}$   $[\text{M}+\text{H}^+]$ : 322.0048, found 322.0046.

1-(4-(*tert*-butyl)phenyl)-3-(2,2,2-trifluoroethyl)pyrrolidin-2-one (**2i**)

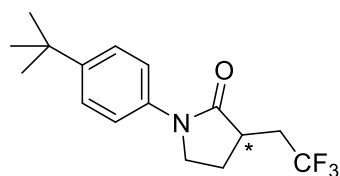

White solid; 93% yield; 99% ee;  $[\alpha]_D^{25} = +15.7$  ( $c = 1.0$ ,  $\text{CH}_2\text{Cl}_2$ ); SFC condition: Lux 5u Cellulose-1 ( $250 \times 4.60$  mm),  $\text{MeOH} : \text{CO}_2 = 10:90$ , 3.0 mL/min, 254 nm;  $t_R = 2.0$  min (minor),  $t_R = 2.1$  min (major);  $^1\text{H NMR}$  ( $\text{CDCl}_3$ , 400 MHz)  $\delta$ : 7.46 (d,  $J = 8.6$  Hz, 2H), 7.33 (d,  $J = 8.5$  Hz, 2H), 3.81 – 3.70 (m, 2H), 2.94 – 2.79 (m, 2H), 2.48 – 2.45 (m, 1H), 2.11–2.03 (m, 1H), 1.93 – 1.83 (m, 1H), 1.25 (s, 9H);  $^{13}\text{C NMR}$  ( $\text{CDCl}_3$ , 101 MHz)  $\delta$ : 172.6, 147.9, 136.4, 127.0 (q,  $J = 278.8$  Hz), 125.8, 119.6, 46.7, 38.2 (q,  $J = 3.0$  Hz), 35.5 (q,  $J = 28.9$  Hz), 34.4, 31.3, 25.8;  $^{19}\text{F NMR}$  ( $\text{CDCl}_3$ , 376 MHz)  $\delta$ : -64.9 (t,  $J = 10.7$  Hz, 3F); TOF-HRMS Calcd. for  $\text{C}_{16}\text{H}_{21}\text{NOF}_3$   $[\text{M}+\text{H}^+]$ : 300.1569, found 300.1564.

1-(3-nitrophenyl)-3-(2,2,2-trifluoroethyl)pyrrolidin-2-one (**2j**)

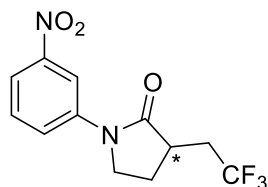

Yellow solid; 90% yield; 99.7% ee;  $[\alpha]_D^{25} = +20.3$  ( $c = 0.5$ ,  $\text{CH}_2\text{Cl}_2$ ); SFC condition: Lux 5u Amylose-1 ( $250 \times 4.60$  mm),  $\text{MeOH} : \text{CO}_2 = 10:90$ , 3.0 mL/min, 254 nm;  $t_R = 5.0$  min (major),  $t_R = 6.5$  min (minor);  $^1\text{H NMR}$  ( $\text{CDCl}_3$ , 400 MHz)  $\delta$ : 8.38 (t,  $J = 2.0$  Hz, 1H), 8.17 (d,  $J = 8.2$  Hz, 1H), 8.02 (d,  $J = 8.2$  Hz, 1H), 7.55 (t,  $J = 8.2$  Hz, 1H), 3.93 – 3.85 (m, 1H), 3.01 – 2.92 (m, 2H), 2.65 – 2.58 (dt,  $J = 14.1, 7.2$  Hz), 2.24 – 2.09

(m, 1H), 2.06 – 1.96 (m, 1H); <sup>13</sup>C NMR (CDCl<sub>3</sub>, 101 MHz) δ: 173.4, 148.6, 140.2, 129.9, 126.8 (q, *J* = 277.8 Hz), 125.3, 119.3, 113.9, 38.4 (q, *J* = 2.9 Hz), 35.4 (q, *J* = 29.5 Hz), 25.6; <sup>19</sup>F NMR (CDCl<sub>3</sub>, 376 MHz) δ: -64.7 (t, *J* = 10.2 Hz, 3F); TOF-HRMS Calcd. for C<sub>12</sub>H<sub>12</sub>N<sub>2</sub>O<sub>3</sub>F<sub>4</sub> [M+H<sup>+</sup>]: 289.0794, found 289.0798.

1-(3,5-dimethylphenyl)-3-(2,2,2-trifluoroethyl)pyrrolidin-2-one (**2k**)

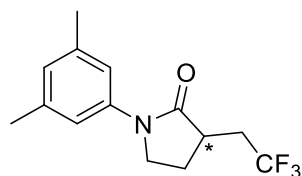

White solid; 92% yield; 99.9% ee; [ $\alpha$ ]<sub>D</sub><sup>25</sup> = +21.2 (c = 0.5, CH<sub>2</sub>Cl<sub>2</sub>); SFC condition: Lux 5u Cellulose-1 (250 × 4.60 mm), MeOH : CO<sub>2</sub> = 10:90, 3.0 mL/min, 254 nm; t<sub>R</sub> = 2.0 min (minor), t<sub>R</sub> = 2.5 min (major); <sup>1</sup>H NMR (CDCl<sub>3</sub>, 400 MHz) δ: 7.20 (s, 2H), 6.81 (s, 1H), 3.85 – 3.73 (m, 2H), 3.06 – 2.74 (m, 2H), 2.54 – 2.47 (m, 1H), 2.31 (s, 6H), 2.19 – 2.05 (m, 2H) 1.97 – 1.87 (m, 1H); <sup>13</sup>C NMR (CDCl<sub>3</sub>, 101 MHz) δ: 172.8, 139.1, 138.7, 127.0 (q, *J* = 277.8 Hz), 126.8, 118.0, 47.1, 38.4 (q, *J* = 3.0 Hz), 35.6 (q, *J* = 29.3 Hz), 26.0, 21.5; <sup>19</sup>F NMR (CDCl<sub>3</sub>, 376 MHz) δ: -64.9 (t, *J* = 10.7 Hz, 3F); TOF-HRMS Calcd. for C<sub>14</sub>H<sub>17</sub>NOF<sub>3</sub> [M+H<sup>+</sup>]: 272.1256, found 272.1262.

1-(3,4-dimethylphenyl)-3-(2,2,2-trifluoroethyl)pyrrolidin-2-one (**2l**)

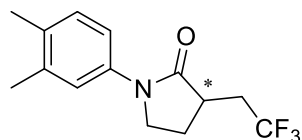

White solid; 92% yield; 99% ee; [ $\alpha$ ]<sub>D</sub><sup>25</sup> = +22.4 (c = 1.0, CH<sub>2</sub>Cl<sub>2</sub>); SFC condition: Lux 5u Cellulose-1 (250 × 4.60 mm), MeOH : CO<sub>2</sub> = 10:90, 3.0 mL/min, 254 nm; t<sub>R</sub> = 2.2 min (minor), t<sub>R</sub> = 2.5 min (major); <sup>1</sup>H NMR (CDCl<sub>3</sub>, 400 MHz) δ: 7.38 (s, 1H), 7.27 (d, *J* = 8.2 Hz, 1H), 7.11 (d, *J* = 8.2 Hz, 1H), 3.84 – 3.72 (m, 2H), 3.03 – 2.83 (m, 2H), 2.54 – 2.48 (m, 1H), 2.26 (s, 3H), 2.23 (s, 3H), 2.16 – 2.07 (m, 1H), 1.98 – 1.87 (m, 1H); <sup>13</sup>C NMR (CDCl<sub>3</sub>, 101 MHz) δ: 172.7, 137.3, 136.9, 133.6, 130.0, 127.0 (q, *J* = 276.6 Hz), 121.5, 117.6, 47.1, 38.3 (q, *J* = 2.1 Hz), 35.7 (q, *J* = 29.0 Hz), 26.0, 20.1, 19.3; <sup>19</sup>F NMR (CDCl<sub>3</sub>, 377 MHz) δ: -64.9 (t, *J* = 10.8 Hz, 3F); TOF-HRMS Calcd. for C<sub>14</sub>H<sub>17</sub>NOF<sub>3</sub> [M+H<sup>+</sup>]: 272.1256, found 272.1262.

1-(3,5-dimethoxyphenyl)-3-(2,2,2-trifluoroethyl)pyrrolidin-2-one (**2m**)

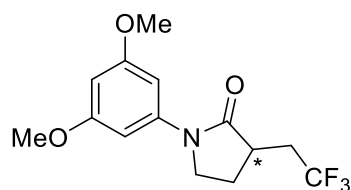

White solid; 93% yield; 99.9% ee; [ $\alpha$ ]<sub>D</sub><sup>25</sup> = +3.5 (c = 0.5, CH<sub>2</sub>Cl<sub>2</sub>); SFC condition: Lux 5u Cellulose-1 (250 × 4.60 mm), MeOH : CO<sub>2</sub> = 5:95, 2.0 mL/min, 254 nm; t<sub>R</sub>

=9.7min (minor),  $t_R = 10.1$  min (major);  $^1\text{H NMR}$  ( $\text{CDCl}_3$ , 400 MHz)  $\delta$ : 7.53 (t,  $J = 1.3$  Hz, 1H), 6.84 (d,  $J = 1.3$  Hz, 2H), 3.89 (s, 3H), 3.86 (s, 3H), 3.89 – 3.74 (m, 2H), 3.03–2.86 (m, 2H), 2.56 – 2.49 (m, 1H), 2.18–2.08 (m, 1H), 2.00 – 1.89 (m, 1H);  $^{13}\text{C NMR}$  ( $\text{CDCl}_3$ , 101 MHz)  $\delta$ : 172.6, 149.1, 146.5, 132.9, 127.0 (q,  $J = 282.7$  Hz), 111.6, 111.1, 105.1, 56.2, 56.1, 47.2, 38.4, 35.7 (q,  $J = 29.0$  Hz), 25.8;  $^{19}\text{F NMR}$  ( $\text{CDCl}_3$ , 377 MHz)  $\delta$ : -64.9 (t,  $J = 10.6$  Hz, 3F). TOF-HRMS Calcd. for  $\text{C}_{14}\text{H}_{17}\text{F}_3\text{NO}_3$  [ $\text{M}+\text{H}^+$ ]: 304.1155, found 304.1157.

1-(3,5-dichlorophenyl)-3-(2,2,2-trifluoroethyl)pyrrolidin-2-one (**2n**)

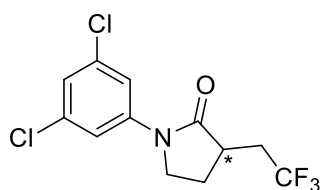

White solid; 94% yield; 97% ee;  $[\alpha]_{\text{D}}^{25} = +18.3$  ( $c = 0.5$ ,  $\text{CH}_2\text{Cl}_2$ ); SFC condition: Lux 5u Cellulose-1 ( $250 \times 4.60$  mm),  $\text{MeOH} : \text{CO}_2 = 10:90$ , 3.0 mL/min, 230 nm;  $t_R = 2.9$  min (minor),  $t_R = 3.0$  min (major);  $^1\text{H NMR}$  ( $\text{CDCl}_3$ , 400 MHz)  $\delta$ : 7.59 (s, 2H), 7.15 (s, 1H), 3.81 – 3.76 (m, 2H), 2.98–2.90 (m, 2H), 2.60 – 2.52 (m, 1H), 2.20 – 2.10 (m, 1H), 2.06 – 1.93 (m, 1H);  $^{13}\text{C NMR}$  ( $\text{CDCl}_3$ , 101 MHz)  $\delta$ : 173.2, 140.9, 135.4, 126.8 (d,  $J = 276.4$  Hz), 124.7, 117.8, 46.6, 38.4 (q,  $J = 2.7$  Hz), 35.4 (q,  $J = 29.3$  Hz), 25.6;  $^{19}\text{F NMR}$  ( $\text{CDCl}_3$ , 376 MHz)  $\delta$ : -64.7 – -64.9 (m, 3F); TOF-HRMS Calcd. for  $\text{C}_{12}\text{H}_{11}\text{NOF}_3\text{Cl}_2$  [ $\text{M}+\text{H}^+$ ]: 312.0164, found 312.0165.

1-(3,4-dichlorophenyl)-3-(2,2,2-trifluoroethyl)pyrrolidin-2-one (**2o**)

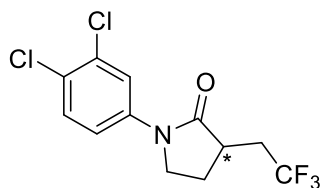

White solid; 95% yield; 98% ee;  $[\alpha]_{\text{D}}^{25} = +20.4$  ( $c = 1.0$ ,  $\text{CH}_2\text{Cl}_2$ ); SFC condition: Lux 5u Amylose-1 ( $250 \times 4.60$  mm),  $\text{MeOH} : \text{CO}_2 = 10:90$ , 3.0 mL/min, 254 nm;  $t_R = 4.7$  min (major),  $t_R = 5.7$  min (minor);  $^1\text{H NMR}$  ( $\text{CDCl}_3$ , 400 MHz)  $\delta$ : 7.78 (s, 1H), 7.52 (d,  $J = 8.9$  Hz, 1H), 7.42 (d,  $J = 8.9$  Hz, 1H) 3.81–3.76 (m, 2H), 3.03 – 2.81 (m, 2H), 2.67 – 2.46 (m, 1H), 2.21 – 2.05 (m, 1H), 2.04 – 1.87 (m, 1H);  $^{13}\text{C NMR}$  ( $\text{CDCl}_3$ , 101 MHz)  $\delta$ : 173.1, 138.6, 132.9, 130.5, 128.2, 126.8 (q,  $J = 277.8$  Hz), 121.2, 118.8, 46.6, 38.4 (q,  $J = 2.0$  Hz), 35.5 (q,  $J = 29.3$  Hz), 25.6;  $^{19}\text{F NMR}$  ( $\text{CDCl}_3$ , 377 MHz)  $\delta$ : -64.9 (t,  $J = 10.5$  Hz, 3F); TOF-HRMS Calcd. for  $\text{C}_{12}\text{H}_{11}\text{NOF}_3\text{Cl}_2$  [ $\text{M}+\text{H}^+$ ]: 312.0164, found 312.0165.

1-(naphthalen-1-yl)-3-(2,2,2-trifluoroethyl)pyrrolidin-2-one (**2p**)

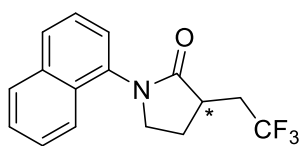

White solid; 91% yield; 99.9% ee;  $[\alpha]_{\text{D}}^{25} = +23.4$  ( $c = 0.5$ ,  $\text{CH}_2\text{Cl}_2$ ); SFC condition: Lux 5u Cellulose-1 ( $250 \times 4.60$  mm),  $\text{MeOH} : \text{CO}_2 = 10:90$ , 3.0 mL/min, 230 nm;  $t_{\text{R}} = 4.6$  min (major),  $t_{\text{R}} = 5.8$  min (minor);  $^1\text{H NMR}$  ( $\text{CDCl}_3$ , 400 MHz)  $\delta$ : 7.91 – 7.84 (m, 2H), 7.66 – 7.63 (m, 1H), 7.54 – 7.47 (m, 3H), 7.36 (dd,  $J = 7.3, 1.0$  Hz, 1H), 3.94– 3.87 (m, 1H), 3.80 – 3.74 (m, 1H), 3.10 – 2.97 (m, 2H), 2.70 – 2.62 (m, 1H), 2.32 – 2.14 (m, 2H);  $^{13}\text{C NMR}$  ( $\text{CDCl}_3$ , 101 MHz)  $\delta$ : 174.0, 135.2, 134.7, 129.6, 129.2 (q,  $J = 157.6$  Hz), 128.8, 128.8, 127.0, 126.6, 125.7, 124.7, 122.4, 49.9, 37.4 (q,  $J = 2.2$  Hz), 35.8 (q,  $J = 29.3$  Hz), 27.2;  $^{19}\text{F NMR}$  ( $\text{CDCl}_3$ , 565 MHz)  $\delta$ : -64.7 (s, 3F); TOF-HRMS Calcd. for  $\text{C}_{16}\text{H}_{15}\text{NOF}_3$  [ $\text{M}+\text{H}^+$ ]: 294.1100, found 294.1103.

1-methyl-3-(2,2,2-trifluoroethyl)pyrrolidin-2-one (**2q**)

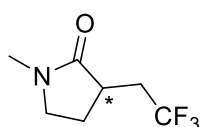

Colorless oil; 94% yield; 99.9% ee;  $[\alpha]_{\text{D}}^{25} = 2.4$  ( $c = 0.3$ ,  $\text{CH}_2\text{Cl}_2$ ); GC conditions: Supelco Alpha Dex<sup>TM</sup> 120 column ( $30 \text{ m} \times 0.25 \text{ mm} \times 0.25 \mu\text{m}$ ),  $\text{N}_2$  1.0 mL/min, programmed 70 °C - 0.6 °C/min - 190 °C (hold 50 min);  $t_{\text{R}} = 31.1$  min (minor),  $t_{\text{R}} = 31.9$  (major);  $^1\text{HNMR}$  (600 MHz, Chloroform-*d*)  $\delta$  3.32 (dt,  $J = 19.89, 9.11$  Hz, 2H), 2.86 (d,  $J = 3.10$  Hz, 4H), 2.66 (q,  $J = 10.73$  Hz, 1H), 2.38 (dd,  $J = 13.22, 7.42$  Hz, 1H), 1.98 (dt,  $J = 15.68, 10.57$  Hz, 1H), 1.80 (p,  $J = 10.31$  Hz, 1H).  $^{13}\text{C NMR}$  (151 MHz, Chloroform-*d*)  $\delta$  173.7, 127.0 (d,  $J = 276.2$  Hz), 47.5, 36.6, 35.7 (q,  $J = 28.8$  Hz), 30.0, 25.8.  $^{19}\text{F NMR}$  ( $\text{CDCl}_3$ , 377 MHz)  $\delta$ : -78.4 (s, 3F); TOF-HRMS Calcd. for  $\text{C}_7\text{H}_{11}\text{F}_3\text{NO}$  [ $\text{M}+\text{H}^+$ ]: 182.0787, found 182.0789.

1-benzyl-3-(2,2,2-trifluoroethyl)pyrrolidin-2-one (**2r**)

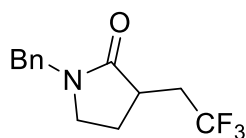

Colorless oil; 96% yield; 99.9% ee;  $[\alpha]_{\text{D}}^{25} = 4.6$  ( $c = 0.5$ ,  $\text{CH}_2\text{Cl}_2$ ); SFC condition: Lux 5u Amylose-1 ( $250 \times 4.60$  mm),  $\text{MeOH} : \text{CO}_2 = 10:90$ , 3.0 mL/min, 210 nm;  $t_{\text{R}} = 3.5$  min (major),  $t_{\text{R}} = 3.7$  min (minor);  $^1\text{H NMR}$  (600 MHz, Chloroform-*d*)  $\delta$  7.34 – 7.30 (m, 2H), 7.30 – 7.25 (m, 1H), 7.23 – 7.18 (m, 2H), 4.46 (s, 2H), 3.28 – 3.14 (m, 2H), 2.97 – 2.88 (m, 1H), 2.76 – 2.70 (m, 1H), 2.40 – 2.30 (m, 1H), 2.09 – 1.99 (m, 1H), 1.81 – 1.74 (m, 1H).  $^{13}\text{C NMR}$  (151 MHz, Chloroform-*d*)  $\delta$  173.6, 136.2, 128.8, 128.2, 127.8, 127.0 (q,  $J = 276.3$  Hz), 47.1,



44.8, 36.9 (d,  $J = 2.9$  Hz), 35.7 (q,  $J = 29.0$  Hz), 25.9.  $^{19}\text{F}$  NMR ( $\text{CDCl}_3$ , 377 MHz)  $\delta$ : -64.8 (s, 3F); TOF-HRMS Calcd. for  $\text{C}_{13}\text{H}_{15}\text{F}_3\text{NO}$  [ $\text{M}+\text{H}^+$ ]: 258.1100, found 258.1103.

*tert*-butyl-2-oxo-3-(2,2,2-trifluoroethyl)pyrrolidine-1-carboxylate (**2s**)

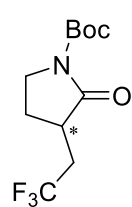

White solid; 93% yield; 93% ee;  $[\alpha]_{\text{D}}^{25} = 40.7$  ( $c = 1.0$ ,  $\text{CH}_2\text{Cl}_2$ ); SFC condition: Lux 5u Amylose-1 ( $250 \times 4.60$  mm),  $\text{MeOH} : \text{CO}_2 = 20:80$ , 3.0 mL/min, 210 nm;  $t_{\text{R}} = 1.4$  min (major),  $t_{\text{R}} = 1.5$  min (minor);  $^1\text{H}$  NMR (600 MHz, Chloroform-*d*)  $\delta$  3.82 (t,  $J = 9.99$  Hz, 1H), 3.57 (td,  $J = 11.11$ , 6.67 Hz, 1H), 2.96 – 2.83 (m, 1H), 2.83 – 2.73 (m, 1H), 2.37 (dt,  $J = 14.15$ , 7.48 Hz, 1H), 2.04 (dp,  $J = 15.19$ , 10.39 Hz, 1H), 1.76 (p,  $J = 11.41$  Hz, 1H), 1.51 (d,  $J = 2.44$  Hz, 9H).  $^{13}\text{C}$  NMR (151 MHz, Chloroform-*d*)  $\delta$  173.0, 150.0, 126.7 (d,  $J = 276.2$  Hz), 83.4, 44.5, 38.7, 34.9 (q,  $J = 29.4$  Hz), 28.0, 25.2.  $^{19}\text{F}$  NMR ( $\text{CDCl}_3$ , 377 MHz)  $\delta$ : -64.8 (s, 3F); TOF-HRMS Calcd. for  $\text{C}_7\text{H}_9\text{F}_3\text{NO}_3$  [ $\text{M}+\text{H}^+$ ]: 212.0529, found 212.0532.

3-(2,2,2-trifluoroethyl)pyrrolidin-2-one (**2t**)

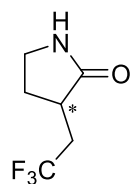

White solid; 92% yield; 94% ee;  $[\alpha]_{\text{D}}^{25} = 11.8$  ( $c = 1.0$ ,  $\text{CH}_2\text{Cl}_2$ ); SFC condition: Lux 5u Amylose-1 ( $250 \times 4.60$  mm),  $\text{MeOH} : \text{CO}_2 = 20:80$ , 3.0 mL/min, 210 nm;  $t_{\text{R}} = 2.7$  min (major),  $t_{\text{R}} = 2.2$  min (minor);  $^1\text{H}$  NMR (600 MHz, Chloroform-*d*)  $\delta$  6.28 (d,  $J = 32.24$  Hz, 1H), 3.41 – 3.27 (m, 2H), 2.83 (dq,  $J = 14.47$ , 11.72, 2.63 Hz, 1H), 2.64 (tdd,  $J = 11.14$ , 8.26, 2.62 Hz, 1H), 2.47 (dt,  $J = 13.96$ , 7.21 Hz, 1H), 2.06 – 1.97 (m, 1H), 1.96 – 1.85 (m, 1H).  $^{13}\text{C}$  NMR (151 MHz, Chloroform-*d*)  $\delta$  177.5, 126.9 (d,  $J = 276.22$  Hz), 40.3, 35.9, 35.2 (q,  $J = 29.17$  Hz), 28.4.  $^{19}\text{F}$  NMR ( $\text{CDCl}_3$ , 377 MHz)  $\delta$ : -65.0 (s, 3F); TOF-HRMS Calcd. for  $\text{C}_6\text{H}_9\text{F}_3\text{NO}$  [ $\text{M}+\text{H}^+$ ]: 168.0631, found 168.0632.

1-phenyl-3-(2,2,2-trifluoroethyl)piperidin-2-one (**4a**)

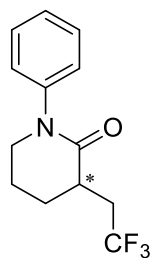

Colorless oil; 93% yield; 96% ee;  $[\alpha]_{\text{D}}^{25} = -26.7$  ( $c = 1.0$ ,  $\text{CH}_2\text{Cl}_2$ ); SFC condition: Lux 5u Amylose-1 ( $250 \times 4.60$  mm),  $\text{MeOH} : \text{CO}_2 = 20:80$ , 3.0 mL/min, 210 nm;  $t_{\text{R}} = 2.4$  min (major),  $t_{\text{R}} = 3.2$  min (minor);  $^1\text{H}$  NMR (600 MHz, Chloroform-*d*)  $\delta$  7.38 (tt,  $J = 7.49$ , 1.15 Hz, 2H), 7.25 (ddq,  $J = 7.06$ , 5.93, 1.18 Hz, 1H), 7.21 (dt,  $J = 8.46$ , 1.18 Hz, 2H), 3.76 – 3.67 (m, 1H), 3.63 (dddt,  $J = 12.17$ , 5.44, 4.19, 1.27 Hz, 1H), 3.22 – 3.07 (m, 1H), 2.84 –

2.70 (m, 1H), 2.38 – 2.29 (m, 1H), 2.28 – 2.17 (m, 1H), 2.09 – 1.92 (m, 2H), 1.75 (qd,  $J = 11.59, 4.31$  Hz, 1H).  $^{13}\text{C}$  NMR (151 MHz, Chloroform-*d*)  $\delta$  170.0, 143.2, 129.3, 127.3 (q,  $J = 276.3$  Hz), 127.0, 126.1, 51.4, 37.4, 35.2 (q,  $J = 28.4$  Hz), 26.9, 22.5.  $^{19}\text{F}$  NMR ( $\text{CDCl}_3$ , 377 MHz)  $\delta$ : -63.3 (s, 3F); TOF-HRMS Calcd. for  $\text{C}_{13}\text{H}_{15}\text{F}_3\text{NO}$  [ $\text{M}+\text{H}^+$ ]: 258.1100, found 258.0947.

1-(*o*-tolyl)-3-(2,2,2-trifluoroethyl)piperidin-2-one (**4b**)

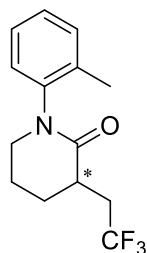

Colorless oil; 92% yield; 93% ee;  $[\alpha]_{\text{D}}^{25} = -36.1$  ( $c = 1.0, \text{CH}_2\text{Cl}_2$ ); SFC condition: Lux 5u Amylose-2 ( $250 \times 4.60$  mm), MeOH :  $\text{CO}_2 = 10:90$ , 3.0 mL/min, 210 nm;  $t_{\text{R}} = 2.8$  min (major),  $t_{\text{R}} = 3.1$  min (minor); (PE/EA = 15/1);  $^1\text{H}$  NMR (400 MHz, Chloroform-*d*)  $\delta$  7.23 (ddd,  $J = 12.82, 5.84, 4.00$  Hz, 3H), 7.08 (td,  $J = 5.17, 2.31$  Hz, 1H), 3.69 – 3.54 (m, 1H), 3.53 – 3.35 (m, 1H), 3.24 – 3.00 (m, 1H), 2.77 (tdd,  $J = 9.82, 5.90, 2.72$  Hz, 1H), 2.30 (ddq,  $J = 26.75, 16.42, 5.53$  Hz, 2H), 2.17 (d,  $J = 10.04$  Hz, 3H), 2.10 – 1.89 (m, 2H), 1.86 – 1.70 (m, 1H).  $^{13}\text{C}$  NMR (151 MHz, Chloroform-*d*)  $\delta$  169.3 (d,  $J = 5.7$  Hz), 142.0, 134.9 (d,  $J = 24.7$  Hz), 131.2 (d,  $J = 13.7$  Hz), 127.9 (d,  $J = 4.3$  Hz), 127.5, 127.2 (d,  $J = 11.2$  Hz), 126.5, 51.2 (d,  $J = 25.5$  Hz), 37.3 (d,  $J = 8.1$  Hz), 35.3 (q,  $J = 28.6$  Hz), 26.9 (d,  $J = 80.4$  Hz), 22.6 (d,  $J = 60.3$  Hz), 17.4 (d,  $J = 8.6$  Hz).  $^{19}\text{F}$  NMR ( $\text{CDCl}_3$ , 377 MHz)  $\delta$ : -63.3 (s, 3F); TOF-HRMS Calcd. for  $\text{C}_{14}\text{H}_{17}\text{F}_3\text{NO}$  [ $\text{M}+\text{H}^+$ ]: 272.1257, found 272.1257.

1-(*m*-tolyl)-3-(2,2,2-trifluoroethyl)piperidin-2-one (**4c**)

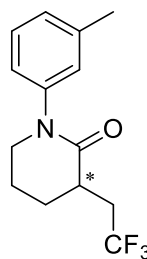

White solid; 94% yield; 94% ee;  $[\alpha]_{\text{D}}^{25} = -33.6$  ( $c = 1.0, \text{CH}_2\text{Cl}_2$ ); SFC condition: Lux 5u Amylose-1 ( $250 \times 4.60$  mm), MeOH :  $\text{CO}_2 = 20:80$ , 3.0 mL/min, 210 nm;  $t_{\text{R}} = 1.7$  min (major),  $t_{\text{R}} = 1.9$  min (minor);  $^1\text{H}$  NMR (600 MHz, Chloroform-*d*)  $\delta$  7.29 – 7.24 (m, 1H), 7.07 (ddt,  $J = 7.68, 1.81, 0.93$  Hz, 1H), 7.03 (d,  $J = 1.87$  Hz, 1H), 7.02 – 6.98 (m, 1H), 3.69 (ddd,  $J = 12.29, 9.94, 4.91$  Hz, 1H), 3.61 (dddt,  $J = 12.09, 5.33, 4.16, 1.20$  Hz, 1H), 3.22 – 3.06 (m, 1H), 2.77 (tdd,  $J = 9.78, 5.99, 3.03$  Hz, 1H), 2.34 (s, 3H), 2.33 – 2.27 (m, 1H), 2.27 – 2.17 (m, 1H), 2.09 – 2.01 (m, 1H), 2.00 – 1.92 (m, 1H), 1.80 – 1.72 (m, 1H).  $^{13}\text{C}$  NMR (151 MHz, Chloroform-*d*)  $\delta$  170.0, 143.2, 139.2, 129.1, 127.8, 127.3 (q,  $J = 28.4$  Hz), 126.9, 123.0, 51.5, 37.4, 35.2 (q,  $J = 28.4$  Hz), 26.9, 22.5, 21.4.  $^{19}\text{F}$  NMR ( $\text{CDCl}_3$ ,

377 MHz)  $\delta$ : -63.3 (s, 3F); TOF-HRMS Calcd. for  $C_{14}H_{17}F_3NO$   $[M+H^+]$ : 272.1257, found 272.1257.

1-(4-methoxyphenyl)-3-(2,2,2-trifluoroethyl)piperidin-2-one (**4d**)

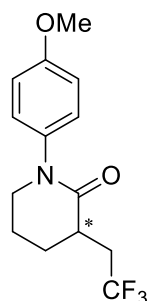

White solid; 90% yield; 93% ee;  $[\alpha]_D^{25} = -36.3$  ( $c = 1.0$ ,  $CH_2Cl_2$ ); SFC condition: Lux 5u Amylose-1 ( $250 \times 4.60$  mm),  $MeOH : CO_2 = 10:90$ , 3.0 mL/min, 210 nm;  $t_R = 5.2$  min (major),  $t_R = 7.5$  min (minor);  $^1H$  NMR (400 MHz, Chloroform-*d*)  $\delta$  7.16 – 7.07 (m, 2H), 6.96 – 6.83 (m, 2H), 3.78 (s, 3H), 3.71 – 3.54 (m, 2H), 3.11 (dtd,  $J = 15.29, 12.27, 3.01$  Hz, 1H), 2.75 (tdd,  $J = 9.71, 5.99, 3.02$  Hz, 1H), 2.38 – 2.13 (m, 2H), 2.08 – 1.88 (m, 2H), 1.73 (dtd,  $J = 13.34, 11.23, 4.27$  Hz, 1H).  $^{13}C$  NMR (101 MHz, Chloroform-*d*)  $\delta$  170.1, 158.3, 136.1, 127.3 (q,  $J = 277.7$  Hz), 127.2, 114.5, 55.5, 51.7, 37.4 (d,  $J = 2.6$  Hz), 35.2 (q,  $J = 28.5$  Hz), 26.9, 22.5.  $^{19}F$  NMR ( $CDCl_3$ , 565 MHz)  $\delta$ : -63.3 (s, 3F); TOF-HRMS Calcd. for  $C_{14}H_{17}F_3NO_2$   $[M+H^+]$ : 288.1206, found 288.1213.

1-(4-(*tert*-butyl)phenyl)-3-(2,2,2-trifluoroethyl)piperidin-2-one (**4e**)

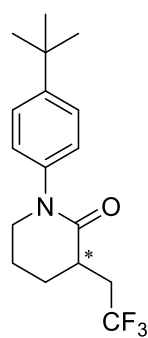

White solid; 95% yield; 95% ee;  $[\alpha]_D^{25} = -15.4$  ( $c = 1.0$ ,  $CH_2Cl_2$ ); SFC condition: Lux 5u Amylose-1 ( $250 \times 4.60$  mm),  $MeOH : CO_2 = 20:80$ , 3.0 mL/min, 210 nm;  $t_R = 3.1$  min (major),  $t_R = 4.1$  min (minor);  $^1H$  NMR (600 MHz, Chloroform-*d*)  $\delta$  7.43 – 7.35 (m, 2H), 7.17 – 7.09 (m, 2H), 3.70 (ddd,  $J = 12.21, 9.91, 4.94$  Hz, 1H), 3.62 (dddd,  $J = 12.26, 5.49, 4.21, 1.38$  Hz, 1H), 3.13 (dq,  $J = 15.33, 12.27, 3.06$  Hz, 1H), 2.83 – 2.72 (m, 1H), 2.31 (dq,  $J = 10.49, 5.06$  Hz, 1H), 2.22 (dp,  $J = 15.26, 10.52$  Hz, 1H), 2.07 – 1.92 (m, 2H), 1.74 (dtd,  $J = 13.46, 11.33, 4.34$  Hz, 1H), 1.31 (s, 9H).  $^{13}C$  NMR (151 MHz, Chloroform-*d*)  $\delta$  170.0, 149.8, 140.5, 127.3 (q,  $J = 276.3$  Hz), 126.2, 125.4, 51.3, 37.4, 35.3 (q,  $J = 28.4$  Hz), 34.6, 31.3, 26.9, 22.5.  $^{19}F$  NMR ( $CDCl_3$ , 565 MHz)  $\delta$ : -63.3 (s, 3F); TOF-HRMS Calcd. for  $C_{17}H_{23}F_3NO$   $[M+H^+]$ : 314.1726, found 314.1723.

1-(2-chlorophenyl)-3-(2,2,2-trifluoroethyl)piperidin-2-one (**4f**)

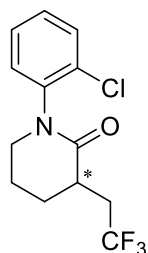

White solid; 91% yield; 95% ee;  $[\alpha]_D^{25} = -19.2$  ( $c = 1.0$ ,  $\text{CH}_2\text{Cl}_2$ ); SFC condition: Lux 5u Amylose-1 ( $250 \times 4.60$  mm),  $\text{MeOH} : \text{CO}_2 = 10:90$ , 3.0 mL/min, 210 nm;  $t_R = 5.2$  min (major),  $t_R = 5.7$  min (minor);  $^1\text{H}$  NMR (600 MHz, Chloroform-*d*)  $\delta$  7.46 (td,  $J = 8.04, 1.57$  Hz, 1H), 7.34 – 7.25 (m, 2H), 7.22 (ddd,  $J = 12.20, 7.63, 1.78$  Hz, 1H), 3.69 – 3.45 (m, 2H), 3.12 (ddqd,  $J = 21.62, 15.30, 12.23, 3.08$  Hz, 1H), 2.88 – 2.71 (m, 1H), 2.40 – 2.17 (m, 2H), 2.16 – 1.92 (m, 2H), 1.86 – 1.72 (m, 1H).  $^{13}\text{C}$  NMR (151 MHz, Chloroform-*d*)  $\delta$  169.8 (d,  $J = 21.8$  Hz), 140.4 (d,  $J = 16.0$  Hz), 132.1 (d,  $J = 18.8$  Hz), 130.5 (d,  $J = 14.0$  Hz), 129.5, 129.3 – 128.8 (m), 128.1 (d,  $J = 48.9$  Hz), 127.2 (q,  $J = 127.2$  Hz), 50.8 (d,  $J = 36.9$  Hz), 37.3 (d,  $J = 18.1$  Hz), 35.9 – 33.9 (m), 26.8 (d,  $J = 34.1$  Hz), 22.4 (d,  $J = 37.5$  Hz).

$^{19}\text{F}$  NMR (565 MHz, Chloroform-*d*)  $\delta$  -63.37 (d,  $J = 172.13$  Hz,  $\text{CF}_3$ ); TOF-HRMS Calcd. for  $\text{C}_{13}\text{H}_{14}\text{ClF}_3\text{NO}$   $[\text{M}+\text{H}^+]$ : 292.0711, found 292.0729.

1-(3-fluorophenyl)-3-(2,2,2-trifluoroethyl)piperidin-2-one (**4g**)

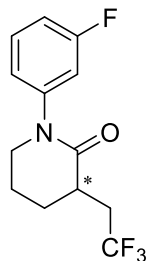

White solid; 94% yield; 98% ee;  $[\alpha]_D^{25} = -24.8$  ( $c = 1.0$ ,  $\text{CH}_2\text{Cl}_2$ ); SFC condition: Lux 5u Amylose-1 ( $250 \times 4.60$  mm),  $\text{MeOH} : \text{CO}_2 = 20:80$ , 3.0 mL/min, 210 nm;  $t_R = 2.5$  min (major),  $t_R = 3.2$  min (minor);  $^1\text{H}$  NMR (400 MHz, Chloroform-*d*)  $\delta$  7.33 (td,  $J = 8.05, 6.39$  Hz, 1H), 7.08 – 6.90 (m, 3H), 3.79 – 3.54 (m, 2H), 3.11 (dq,  $J = 15.18, 12.15, 3.07$  Hz, 1H), 2.77 (dddd,  $J = 12.27, 9.61, 6.06, 3.13$  Hz, 1H), 2.41 – 2.14 (m, 2H), 2.01 (dtq,  $J = 29.69, 9.35, 4.86$  Hz, 2H), 1.74 (qd,  $J = 11.49, 4.61$  Hz, 1H).  $^{13}\text{C}$  NMR (101 MHz, Chloroform-*d*)  $\delta$  170.1, 162.9 (d,  $J = 247.0$  Hz), 144.6 (d,  $J = 9.6$  Hz), 130.2 (d,  $J = 9.1$  Hz), 128.5, 125.8, 121.6 (d,  $J = 3.2$  Hz), 113.7 (dd,  $J = 29.2, 22.0$  Hz), 51.2, 37.5 (d,  $J = 2.8$  Hz), 35.1 (q,  $J = 28.5$  Hz), 26.8, 22.5.  $^{19}\text{F}$  NMR ( $\text{CDCl}_3$ , 565 MHz)  $\delta$ : -63.4 (s, 3F), -111.5 (s, F); TOF-HRMS Calcd. for  $\text{C}_{13}\text{H}_{14}\text{F}_4\text{NO}$   $[\text{M}+\text{H}^+]$ : 276.1006, found 276.1000.

1-(3-bromophenyl)-3-(2,2,2-trifluoroethyl)piperidin-2-one (**4h**)

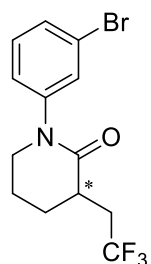

White solid; 93% yield; 99% ee;  $[\alpha]_D^{25} = -15.9$  ( $c = 1.0$ ,  $\text{CH}_2\text{Cl}_2$ ); SFC condition: Lux 5u Amylose-1 ( $250 \times 4.60$  mm),  $\text{MeOH} : \text{CO}_2 = 15:85$ , 3.0 mL/min, 210 nm;  $t_R = 5.3$  min (major),  $t_R = 5.7$  min (minor);  $^1\text{H}$  NMR (600 MHz, Chloroform-*d*)  $\delta$  7.61 – 7.35 (m, 2H), 7.25 (d,  $J = 15.83$  Hz, 1H), 7.20 – 7.07 (m, 1H), 3.70 (ddd,  $J = 12.14, 10.05, 4.96$  Hz, 1H), 3.62 (dddd,  $J = 12.03, 5.42, 4.24, 1.39$  Hz, 1H), 3.10 (dq,  $J = 15.29, 12.18, 3.12$  Hz, 1H), 2.82 – 2.72 (m, 1H), 2.32 (dd,  $J = 13.93, 5.36$  Hz, 1H), 2.28 – 2.14 (m, 1H), 2.10 – 1.91 (m, 2H), 1.74 (dtd,  $J = 13.16, 11.37, 4.24$  Hz, 1H).  $^{13}\text{C}$  NMR (151 MHz, Chloroform-*d*)  $\delta$  170.1, 144.4, 135.5 (d,  $J = 137.6$  Hz), 130.4, 129.7 (q,  $J = 111.7$  Hz), 125.9 (d,  $J = 100.4$  Hz), 124.8, 122.5, 51.3, 37.4, 35.1 (q,  $J = 28.6$  Hz), 26.8, 22.5.  $^{19}\text{F}$  NMR ( $\text{CDCl}_3$ , 377 MHz)  $\delta$ : -63.4 (s, 3F); TOF-HRMS Calcd. for  $\text{C}_{13}\text{H}_{14}\text{BrF}_3\text{NO}$   $[\text{M}+\text{H}^+]$ : 336.0205, found 336.0211.

1-(4-bromophenyl)-3-(2,2,2-trifluoroethyl)piperidin-2-one (**4i**)

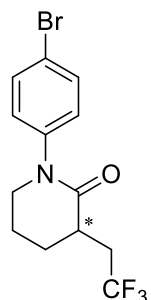

White solid; 95% yield; 96% ee;  $[\alpha]_D^{25} = -29.9$  ( $c = 1.0$ ,  $\text{CH}_2\text{Cl}_2$ ); SFC condition: Lux 5u Cellulose-1 ( $250 \times 4.60$  mm),  $\text{MeOH} : \text{CO}_2 = 10:90$ , 3.0 mL/min, 210 nm;  $t_R = 4.7$  min (major),  $t_R = 5.2$  min (minor);  $^1\text{H}$  NMR (600 MHz, Chloroform-*d*)  $\delta$  7.49 (ddt,  $J = 8.13, 2.99, 1.22$  Hz, 2H), 7.15 – 6.94 (m, 2H), 3.69 (ddd,  $J = 12.73, 9.75, 4.89$  Hz, 1H), 3.61 (dddt,  $J = 12.03, 5.35, 4.12, 1.22$  Hz, 1H), 3.24 – 3.02 (m, 1H), 2.76 (ddt,  $J = 12.99, 9.57, 3.04$  Hz, 1H), 2.32 (dd,  $J = 13.61, 5.69$  Hz, 1H), 2.22 (dp,  $J = 15.15, 10.45$  Hz, 1H), 2.10 – 1.90 (m, 2H), 1.83 – 1.68 (m, 1H).  $^{13}\text{C}$  NMR (151 MHz, Chloroform-*d*)  $\delta$  170.1, 142.2, 132.3, 127.7, 127.1 (q,  $J = 276.3$  Hz), 120.3, 51.2, 37.4, 35.1 (q,  $J = 28.6$  Hz), 26.8, 22.5.  $^{19}\text{F}$  NMR ( $\text{CDCl}_3$ , 565 MHz)  $\delta$ : -63.3 (s, 3F); TOF-HRMS Calcd. for  $\text{C}_{13}\text{H}_{14}\text{BrF}_3\text{NO}$   $[\text{M}+\text{H}^+]$ : 336.0205, found 336.0211.

1-(4-fluorophenyl)-3-(2,2,2-trifluoroethyl)piperidin-2-one (**4j**)

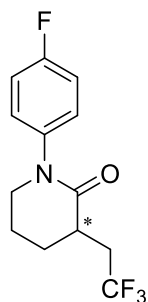

White solid; 94% yield; 98% ee;  $[\alpha]_D^{25} = -37.0$  ( $c = 1.0$ ,  $\text{CH}_2\text{Cl}_2$ ); SFC condition: Lux 5u Amylose-1 ( $250 \times 4.60$  mm),  $\text{MeOH} : \text{CO}_2 = 20:80$ ,  $3.0$  mL/min,  $210$  nm;  $t_R = 2.3$  min (major),  $t_R = 2.9$  min (minor);  $^1\text{H}$  NMR ( $600$  MHz,  $\text{Chloroform-}d$ )  $\delta$  7.22 – 7.13 (m, 2H), 7.11 – 6.99 (m, 2H), 3.68 (ddd,  $J = 11.86, 10.10, 4.84$  Hz, 1H), 3.60 (dtd,  $J = 12.25, 5.37, 4.74, 2.75$  Hz, 1H), 3.10 (dq,  $J = 15.24, 12.22, 3.07$  Hz, 1H), 2.84 – 2.70 (m, 1H), 2.32 (dq,  $J = 14.77, 5.05$  Hz, 1H), 2.23 (dp,  $J = 15.07, 10.50$  Hz, 1H), 2.08 – 1.91 (m, 2H), 1.75 (dtd,  $J = 13.03, 11.43, 4.14$  Hz, 1H).  $^{13}\text{C}$  NMR ( $151$  MHz,  $\text{Chloroform-}d$ )  $\delta$  170.2, 161.2 (d,  $J = 246.3$  Hz), 139.1 (d,  $J = 3.3$  Hz), 127.9, 127.8, 127.2 (q,  $J = 276.3$  Hz), 116.2, 116.0, 51.6, 37.4, 35.2 (q,  $J = 28.7$  Hz), 26.8, 22.5.  $^{19}\text{F}$  NMR ( $\text{CDCl}_3$ ,  $565$  MHz)  $\delta$ : -63.3 (s, 3F), -114.8 (s, F); TOF-HRMS Calcd. for  $\text{C}_{13}\text{H}_{14}\text{F}_4\text{NO}$   $[\text{M}+\text{H}^+]$ : 276.1006, found 276.1000.

1-([1,1'-biphenyl]-4-yl)-3-(2,2,2-trifluoroethyl)piperidin-2-one (**4k**)

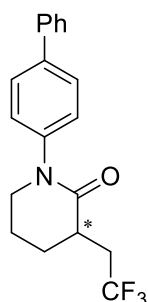

White solid; 90% yield; 95% ee;  $[\alpha]_D^{25} = -38.5$  ( $c = 1.0$ ,  $\text{CH}_2\text{Cl}_2$ ); SFC condition: Lux 5u Cellulose-1 ( $250 \times 4.60$  mm),  $\text{MeOH} : \text{CO}_2 = 20:80$ ,  $3.0$  mL/min,  $210$  nm;  $t_R = 3.9$  min (major),  $t_R = 4.5$  min (minor);  $^1\text{H}$  NMR ( $600$  MHz,  $\text{Chloroform-}d$ )  $\delta$  7.62 – 7.58 (m, 2H), 7.58 – 7.53 (m, 2H), 7.43 (dd,  $J = 8.43, 6.97$  Hz, 2H), 7.37 – 7.32 (m, 1H), 7.32 – 7.27 (m, 2H), 3.76 (ddd,  $J = 12.19, 9.92, 4.91$  Hz, 1H), 3.68 (dddd,  $J = 12.19, 5.48, 4.19, 1.37$  Hz, 1H), 3.15 (dq,  $J = 15.28, 12.23, 3.07$  Hz, 1H), 2.85 – 2.76 (m, 1H), 2.34 (dq,  $J = 10.46, 5.05$  Hz, 1H), 2.25 (dp,  $J = 15.27, 10.49$  Hz, 1H), 2.13 – 1.94 (m, 2H), 1.77 (dtd,  $J = 13.52, 11.41, 4.36$  Hz, 1H).  $^{13}\text{C}$  NMR ( $151$  MHz,  $\text{Chloroform-}d$ )  $\delta$  170.1, 142.3, 140.5, 139.9, 128.8, 128.0, 127.5, 127.2, 126.3, 51.3, 37.5, 35.2 (q,  $J = 28.2$  Hz), 26.9, 22.5.  $^{19}\text{F}$  NMR ( $\text{CDCl}_3$ ,  $565$  MHz)  $\delta$ : -63.3 (s, 3F); TOF-HRMS Calcd. for  $\text{C}_{19}\text{H}_{19}\text{F}_3\text{NO}$   $[\text{M}+\text{H}^+]$ : 334.1413, found 334.1418.

1-(3,4-dimethylphenyl)-3-(2,2,2-trifluoroethyl)piperidin-2-one (**4l**)

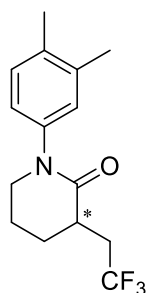

White solid; 93% yield; 92% ee;  $[\alpha]_D^{25} = -36.6$  ( $c = 1.0$ ,  $\text{CH}_2\text{Cl}_2$ ); HPLC condition: Lux 5u Cellulose-2 ( $250 \times 4.60$  mm),  $\text{MeOH} : \text{CO}_2 = 10:90$ ,  $3.0$  mL/min,  $210$  nm;  $t_R = 13.3$  min (major),  $t_R = 12.0$  min (minor);  $^1\text{H}$  NMR ( $400$  MHz, Chloroform-*d*)  $\delta$  7.14 (d,  $J = 7.95$  Hz, 1H), 6.98 (d,  $J = 2.23$  Hz, 1H), 6.92 (dd,  $J = 7.99, 2.30$  Hz, 1H), 3.67 (ddd,  $J = 12.22, 9.76, 5.12$  Hz, 1H), 3.59 (dddd,  $J = 12.24, 5.49, 4.14, 1.37$  Hz, 1H), 3.14 (dq,  $J = 15.29, 12.31, 3.01$  Hz, 1H), 2.84 – 2.60 (m, 1H), 2.35 – 2.26 (m, 1H), 2.24 (t,  $J = 1.17$  Hz, 6H), 2.23 – 2.15 (m, 1H), 2.09 – 1.88 (m, 2H), 1.73 (dtd,  $J = 13.32, 11.21, 4.48$  Hz, 1H).  $^{13}\text{C}$  NMR ( $101$  MHz, Chloroform-*d*)  $\delta$  170.0, 141.0, 137.7, 135.6, 130.4, 127.4 (d,  $J = 277.7$  Hz), 127.3, 123.3, 51.6, 37.4, 35.2 (q,  $J = 28.4$  Hz), 26.9, 22.5, 19.9, 19.4.  $^{19}\text{F}$  NMR ( $376$  MHz, Chloroform-*d*)  $\delta$  -63.3 (s,  $\text{CF}_3$ ); TOF-HRMS Calcd. for  $\text{C}_{15}\text{H}_{19}\text{F}_3\text{NO}$   $[\text{M}+\text{H}^+]$ : 286.1413, found 286.1416.

1-(3,5-dimethylphenyl)-3-(2,2,2-trifluoroethyl)piperidin-2-one (**4m**)

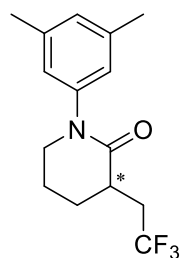

White solid; 95% yield; 93% ee;  $[\alpha]_D^{25} = -24.4$  ( $c = 1.0$ ,  $\text{CH}_2\text{Cl}_2$ ); SFC condition: Lux 5u Amylose-1 ( $250 \times 4.60$  mm),  $\text{MeOH} : \text{CO}_2 = 20:80$ ,  $3.0$  mL/min,  $210$  nm;  $t_R = 1.7$  min (major),  $t_R = 1.9$  min (minor);  $^1\text{H}$  NMR ( $400$  MHz, Chloroform-*d*)  $\delta$  6.90 (s, 1H), 6.82 (s, 2H), 3.75 – 3.50 (m, 2H), 3.14 (tt,  $J = 12.30, 2.99$  Hz, 1H), 2.76 (tdd,  $J = 10.00, 5.94, 3.02$  Hz, 1H), 2.30 (s, 7H), 2.20 (dq,  $J = 15.25, 10.43$  Hz, 1H), 2.08 – 1.88 (m, 2H), 1.81 – 1.66 (m, 1H).  $^{13}\text{C}$  NMR ( $101$  MHz, Chloroform-*d*)  $\delta$  170.0, 143.1, 139.0, 128.8, 127.3 (q,  $J = 278.7$  Hz), 123.8, 51.5, 37.4 (d,  $J = 2.5$  Hz), 35.2 (q,  $J = 28.4$  Hz), 26.9, 22.5, 21.3.  $^{19}\text{F}$  NMR ( $376$  MHz, Chloroform-*d*)  $\delta$  -63.4 (s,  $\text{CF}_3$ ); TOF-HRMS Calcd. for  $\text{C}_{15}\text{H}_{19}\text{F}_3\text{NO}$   $[\text{M}+\text{H}^+]$ : 286.1413, found 286.1416.

1-phenyl-3-(2,2,2-trifluoroethyl)pyrrolidine (**5**)

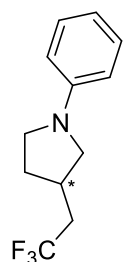

White solid; 90% yield; 94% ee;  $[\alpha]_D^{25} = 3.1$  ( $c = 0.5$ ,  $\text{CH}_2\text{Cl}_2$ ); SFC condition: Lux 5u Amylose-1 ( $250 \times 4.60$  mm),  $\text{MeOH} : \text{CO}_2 = 20:80$ ,  $3.0$  mL/min,  $210$  nm;  $t_R = 1.8$  min (major),  $t_R = 1.6$  min (minor);  $^1\text{H}$  NMR ( $600$  MHz, Chloroform-*d*)  $\delta$  7.28 – 7.18 (m, 2H), 6.69 (td,  $J = 7.28, 1.11$  Hz, 1H),

6.58 – 6.49 (m, 2H), 3.55 (t,  $J = 8.33$  Hz, 1H), 3.39 (td,  $J = 8.80, 2.83$  Hz, 1H), 3.36 – 3.27 (m, 1H), 3.00 (t,  $J = 8.74$  Hz, 1H), 2.60 (dq,  $J = 9.57, 7.24$  Hz, 1H), 2.36 – 2.22 (m, 3H), 1.76 (dq,  $J = 12.26, 9.06$  Hz, 1H).  $^{13}\text{C}$  NMR (151 MHz, Chloroform-*d*)  $\delta$  147.5, 129.4, 129.3, 116.0, 111.6, 53.0, 47.1, 37.5 (q,  $J = 28.1$  Hz), 32.8, 31.7.  $^{19}\text{F}$  NMR (CDCl<sub>3</sub>, 377 MHz)  $\delta$ : -64.8 (s, 3F); TOF-HRMS Calcd. for C<sub>12</sub>H<sub>15</sub>F<sub>3</sub>N [M+H<sup>+</sup>]: 230.1151, found 230.1154.

### 3-(2,2,2-trifluoroethyl)pyrrolidin-2-one (**6**)

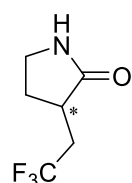

White solid; 92% yield; 92% ee;  $[\alpha]_{\text{D}}^{25} = 11.8$  (c = 1, CH<sub>2</sub>Cl<sub>2</sub>); SFC condition: Lux 5u Amylose-1 (250 × 4.60 mm), MeOH : CO<sub>2</sub> = 20:80, 3.0 mL/min, 210 nm;  $t_{\text{R}} = 2.7$  min (major),  $t_{\text{R}} = 2.2$  min (minor);  $^1\text{H}$  NMR (600 MHz, Chloroform-*d*)  $\delta$  6.28 (d,  $J = 32.24$  Hz, 1H), 3.41 – 3.27 (m, 2H), 2.83 (dq,  $J = 14.47, 11.72, 2.63$  Hz, 1H), 2.64 (tdd,  $J = 11.14, 8.26, 2.62$  Hz, 1H), 2.47 (dt,  $J = 13.96, 7.21$  Hz, 1H), 2.06 – 1.97 (m, 1H), 1.96 – 1.85 (m, 1H).  $^{13}\text{C}$  NMR (151 MHz, Chloroform-*d*)  $\delta$  177.5, 126.9 (d,  $J = 276.22$  Hz), 40.3, 35.9, 35.2 (q,  $J = 29.17$  Hz), 28.4.  $^{19}\text{F}$  NMR (CDCl<sub>3</sub>, 377 MHz)  $\delta$ : -65.0 (s, 3F); TOF-HRMS Calcd. for C<sub>6</sub>H<sub>9</sub>F<sub>3</sub>NO [M+H<sup>+</sup>]: 168.0631, found 168.0632.

### 1-benzyl-3-(2,2,2-trifluoroethyl)pyrrolidine (**7**)

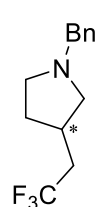

Colorless oil; 88% yield; 99.9% ee;  $[\alpha]_{\text{D}}^{25} = 1.5$  (c = 0.1, CH<sub>2</sub>Cl<sub>2</sub>); HPLC condition: Chiralpak OD-H (250 × 4.60 mm), hexane: isopropanol = 97:3, 210 nm;  $t_{\text{R}} = 4.6$  min (major),  $t_{\text{R}} = 4.9$  min (minor);  $^1\text{H}$  NMR (600 MHz, Chloroform-*d*)  $\delta$  7.33 – 7.29 (m, 4H), 7.27 – 7.22 (m, 1H), 3.66 – 3.55 (m, 2H), 2.84 (dd,  $J = 9.33, 7.44$  Hz, 1H), 2.66 (ddd,  $J = 9.31, 8.06, 5.86$  Hz, 1H), 2.51 – 2.42 (m, 2H), 2.21 – 2.13 (m, 3H), 2.13 – 2.07 (m, 1H), 1.53 – 1.47 (m, 1H).  $^{13}\text{C}$  NMR (151 MHz, Chloroform-*d*)  $\delta$  139.0, 128.8, 128.3, 127.0, 126.9 (q,  $J = 276.1$  Hz). 60.4, 59.8, 53.4, 38.9 (q,  $J = 27.5$  Hz), 31.4, 30.7.  $^{19}\text{F}$  NMR (376 MHz, Chloroform-*d*)  $\delta$  -65.0 (s, CF<sub>3</sub>).<sup>[3]</sup>

### 3-(2,2,2-trifluoroethyl)pyrrolidine hydrochloride (**8**)



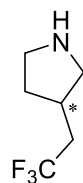

Colorless oil; 73% yield;  $[\alpha]_{\text{D}}^{25} = 1.8$  ( $c = 0.3$ ,  $\text{CH}_2\text{Cl}_2$ );  $^1\text{H}$  NMR (400 MHz,  $\text{D}_2\text{O}$ )  $\delta$  3.45 (dd,  $J = 11.85, 7.80$  Hz, 1H), 3.31 (ddd,  $J = 11.89, 8.79, 3.13$  Hz, 1H), 3.13 (td,  $J = 11.62, 11.21, 8.45$  Hz, 1H), 2.89 – 2.78 (m, 1H), 2.56 – 2.44 (m, 1H), 2.37 – 2.23 (m, 2H), 2.18 (dtd,  $J = 13.53, 6.66, 2.97$  Hz, 1H), 1.70 – 1.54 (m, 1H).  $^{13}\text{C}$  NMR (151 MHz,  $\text{D}_2\text{O}$ )  $\delta$  126.6 (q,  $J = 276.1$  Hz), 49.4, 45.1, 35.1 (q,  $J = 28.5$  Hz), 31.9, 29.8.  $^{19}\text{F}$  NMR (376 MHz,  $\text{D}_2\text{O}$ )  $\delta$  -65.1 (s,  $\text{CF}_3$ ).<sup>[3]</sup>

## References

- [1] P. Zargaran, T. Wurm, D. Zahner, J. Schießl, M. Rudolph, F. Rominger and A. S. K. Hashmi, Front Cover Picture: A Structure-Based Activity Study of Highly Active Unsymmetrically Substituted NHC Gold(I) Catalysts, *Adv. Synth. Catal.*, 2018, **360**, 1-1.
- [2] a) C. Xie, L. Zhang, W. Sha, V. A. Soloshonok, J. Han and Y. Pan, Detrifuoroacetylation in Situ Generation of Free 3-Fluoroindolin-2-one-Derived Tertiary Enolates: Design, Synthesis, and Assessment of Reactivity toward Asymmetric Mannich Reactions, *Org. Lett.*, 2016, **18**, 3270-3273. b) O. Marrec, J. Borrini, T. Billard and B. R. Langlois, Synthesis of  $\beta$ -Trifluoromethylated Enones: An Unexpected Reactivity of Trifluoromethylated Weinreb Enamides towards Organolithium Species, *Synlett*, 2009, **2009**, 1241-1244.
- [3] G. Zhang, B. Shuai, Y. Shan, Preparation of 3-(2,2,2-trifluoroethyl)-pyrrolidine hydrochloride. CN113563242A, 2021.

## 7. NMR, GC and HPLC spectra

### (*E*)-1-phenyl-3-(2,2,2-trifluoroethylidene)pyrrolidin-2-one (**1a**)

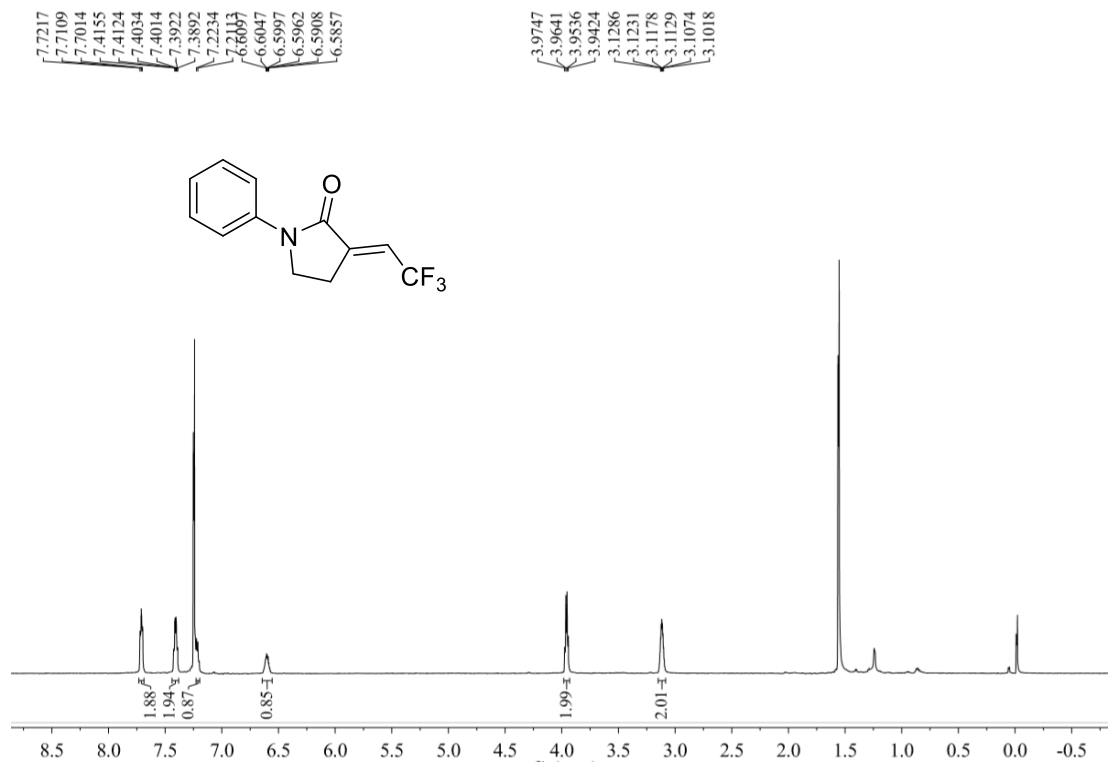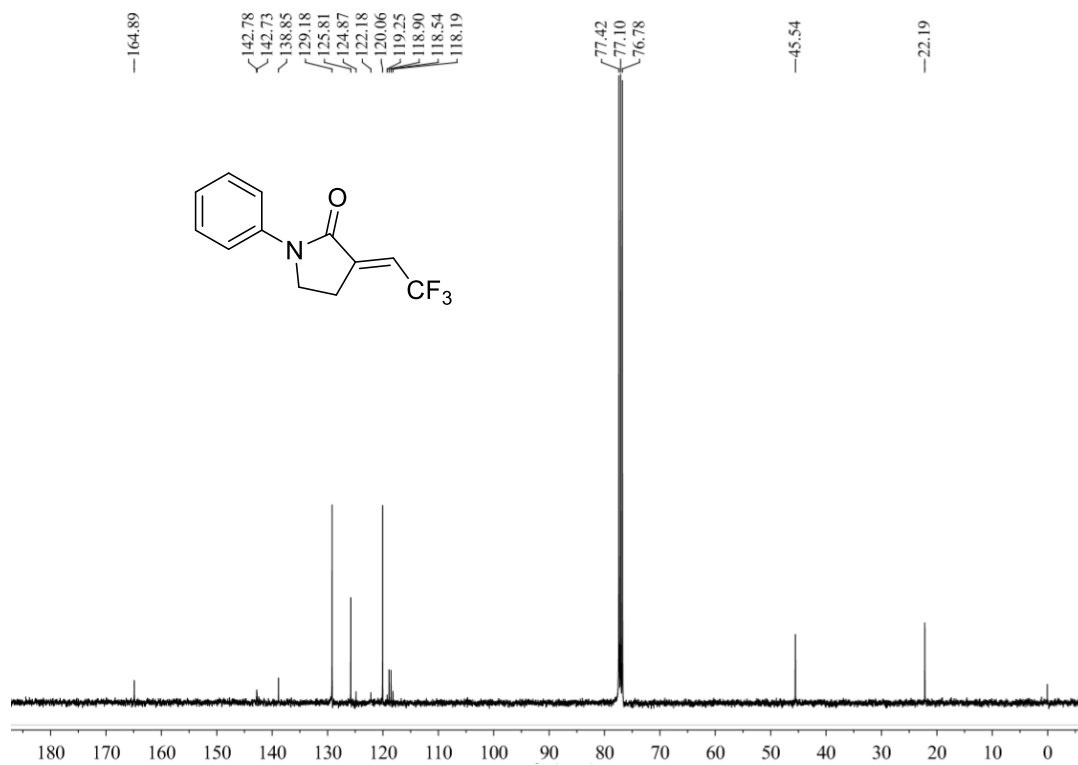

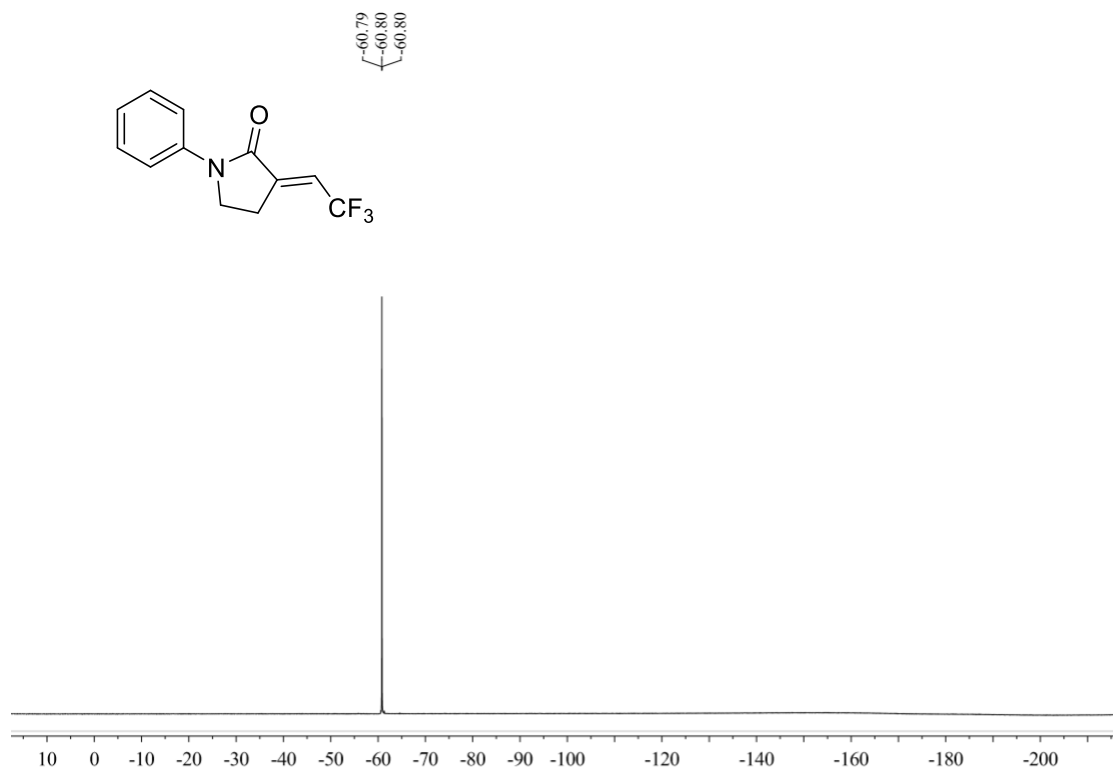

(E)-1-(*m*-tolyl)-3-(2,2,2-trifluoroethylidene)pyrrolidin-2-one (**1b**)

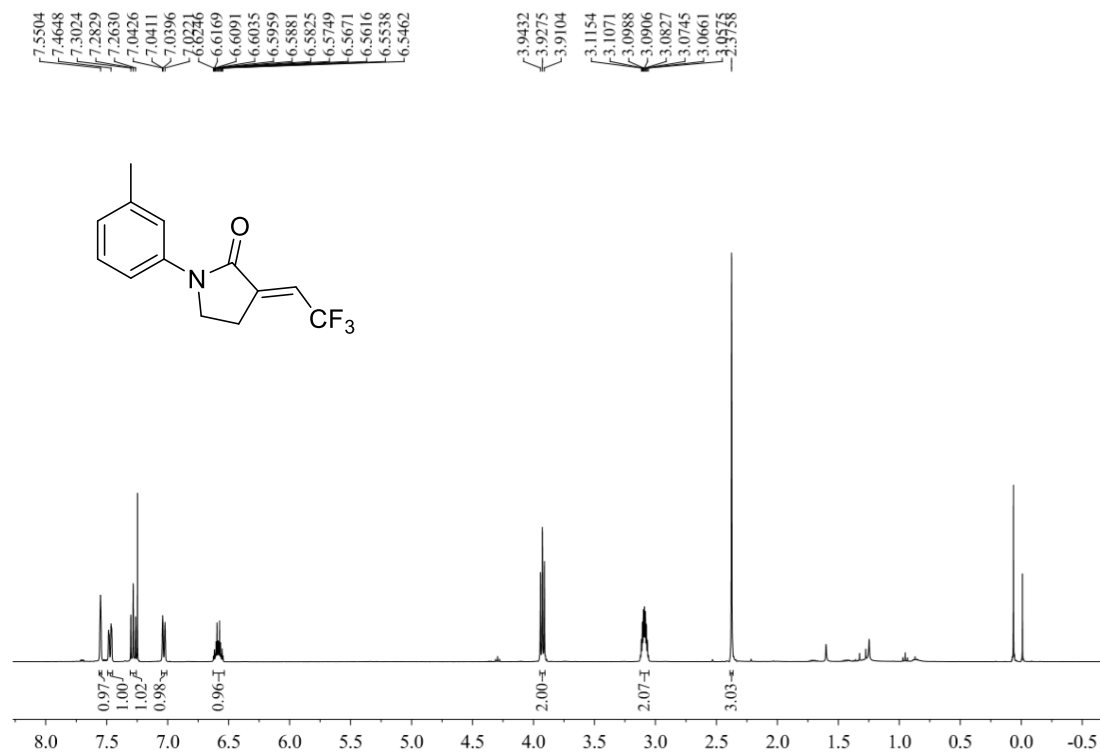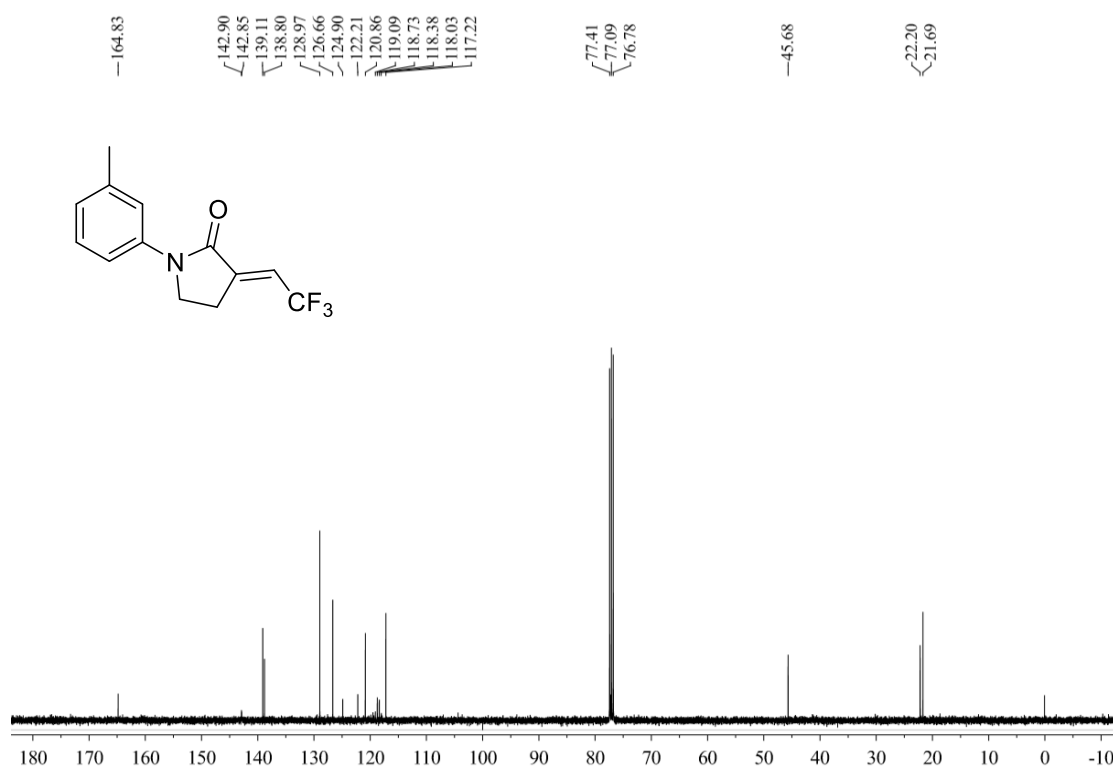

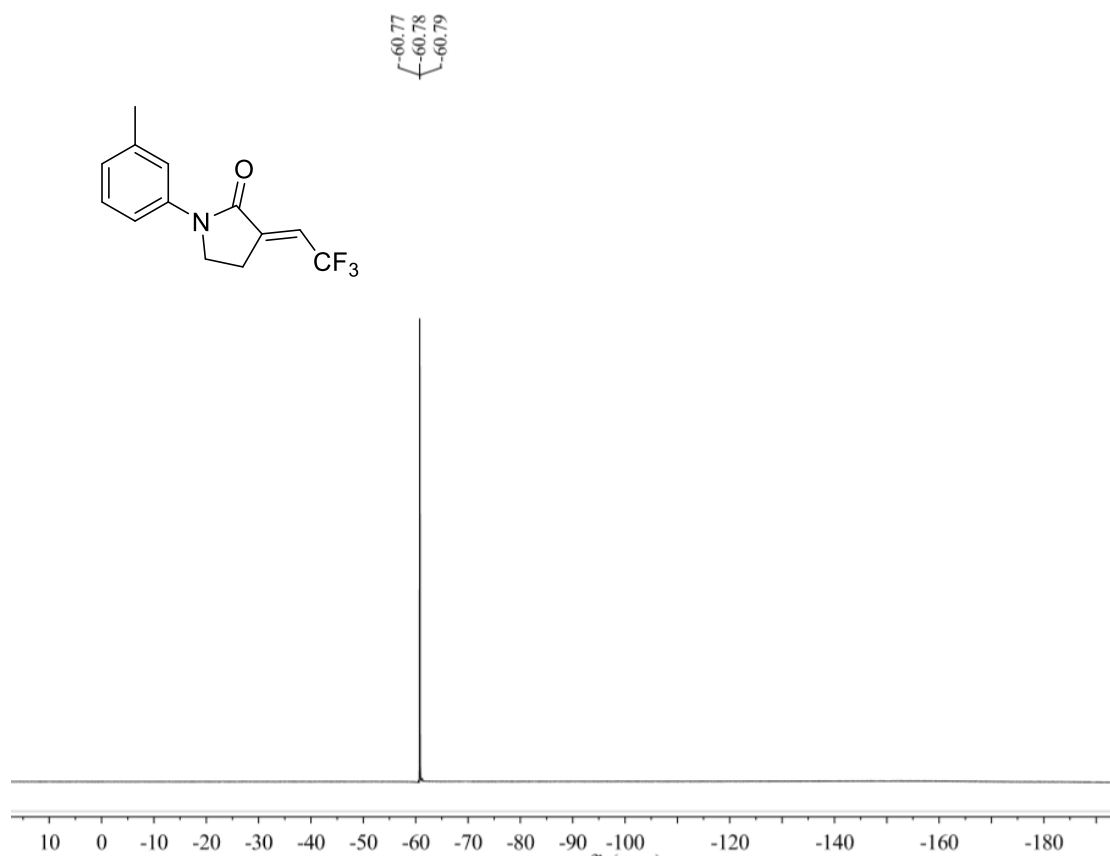

(E)-1-(3-methoxyphenyl)-3-(2,2,2-trifluoroethylidene)pyrrolidin-2-one (**1c**)

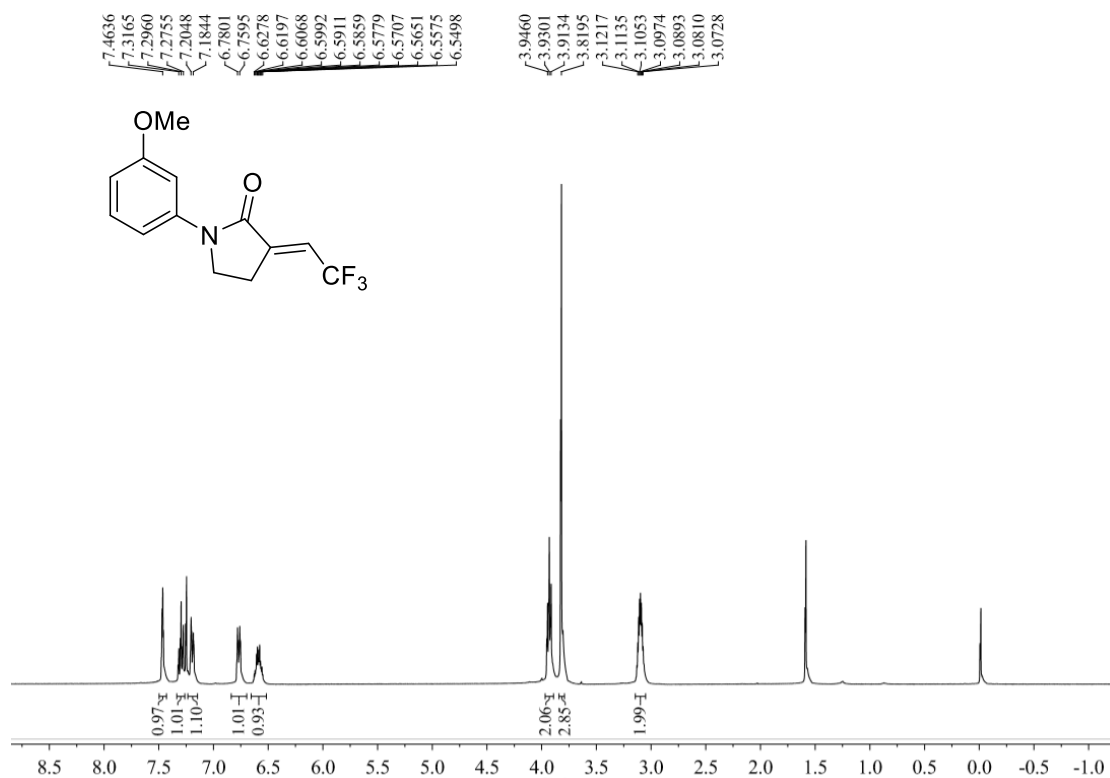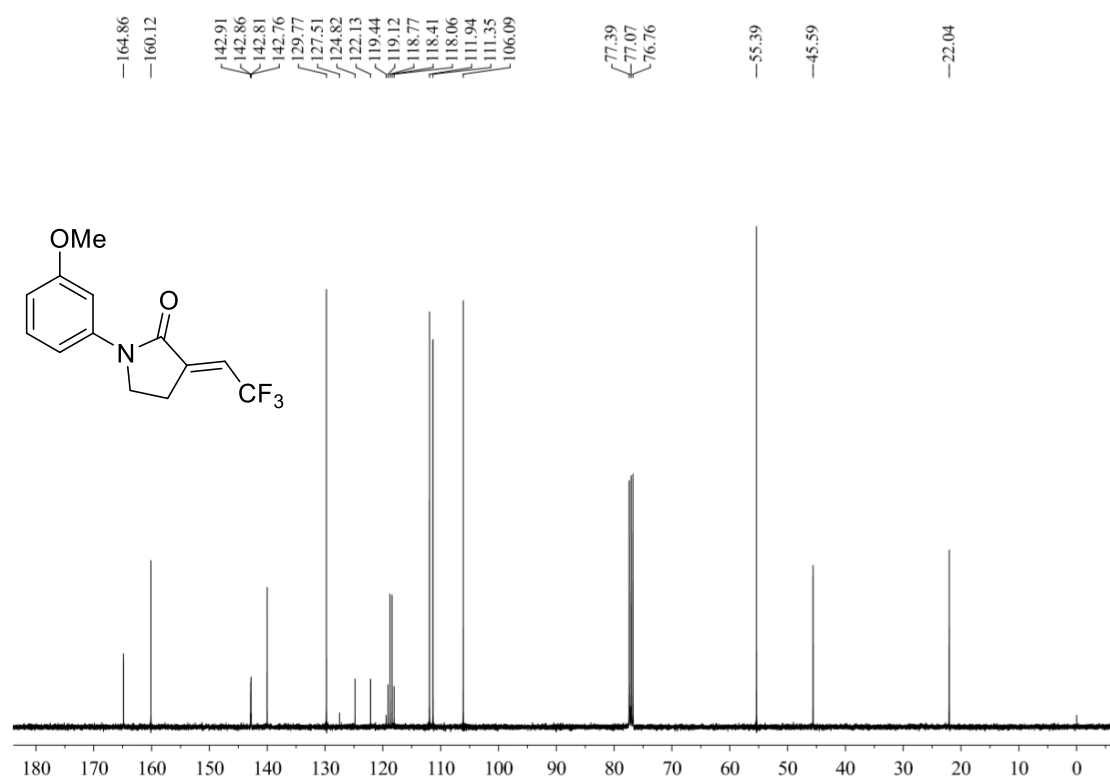

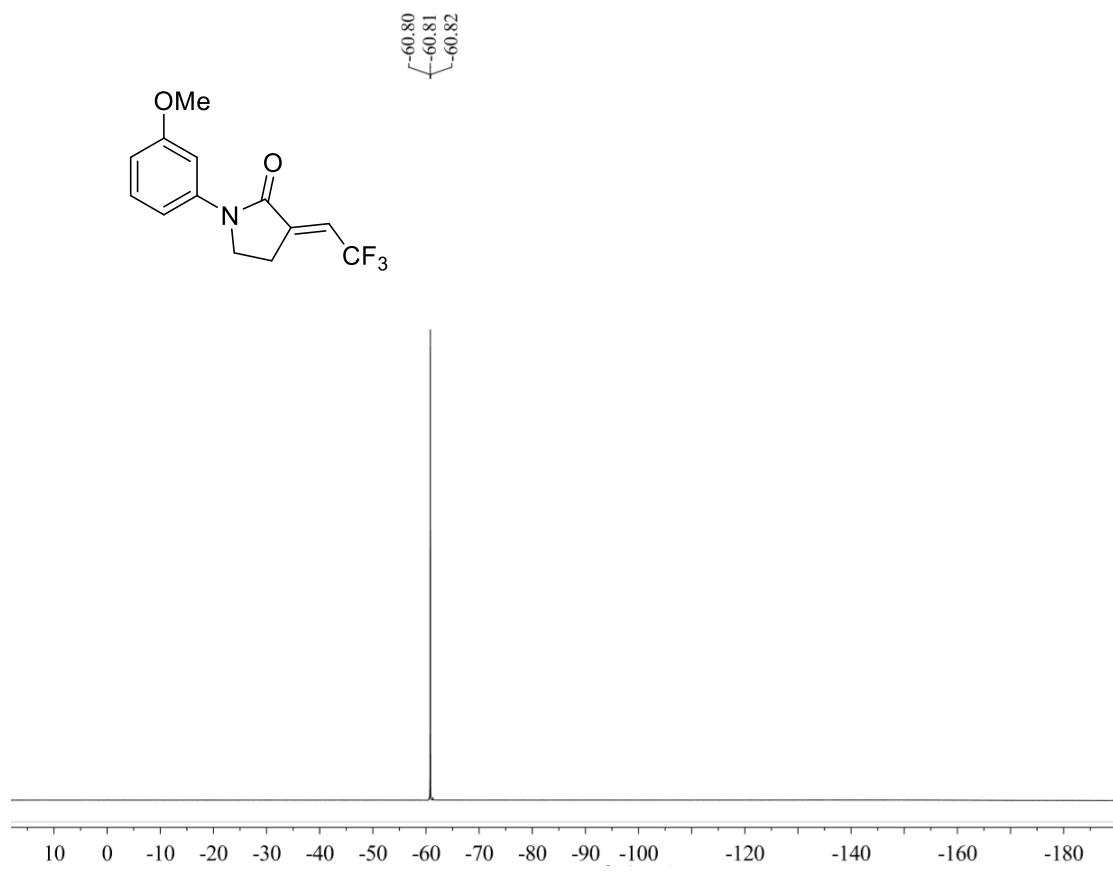

(*E*)-1-(*p*-tolyl)-3-(2,2,2-trifluoroethylidene)pyrrolidin-2-one (**1d**)

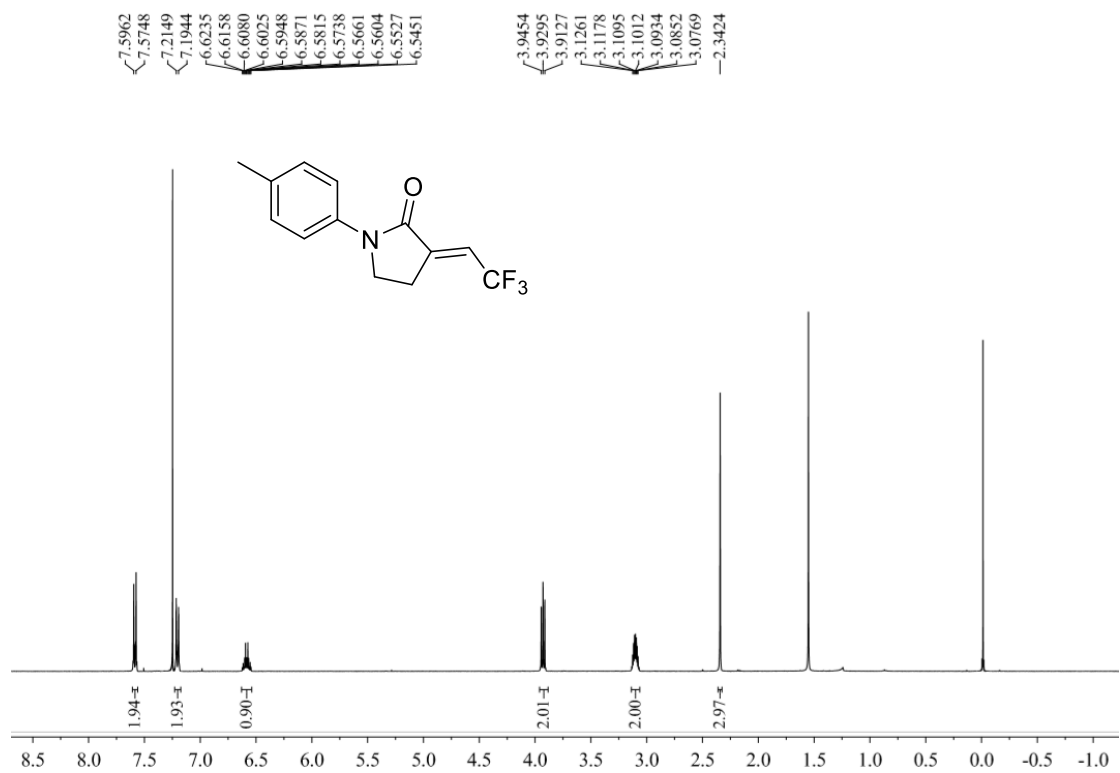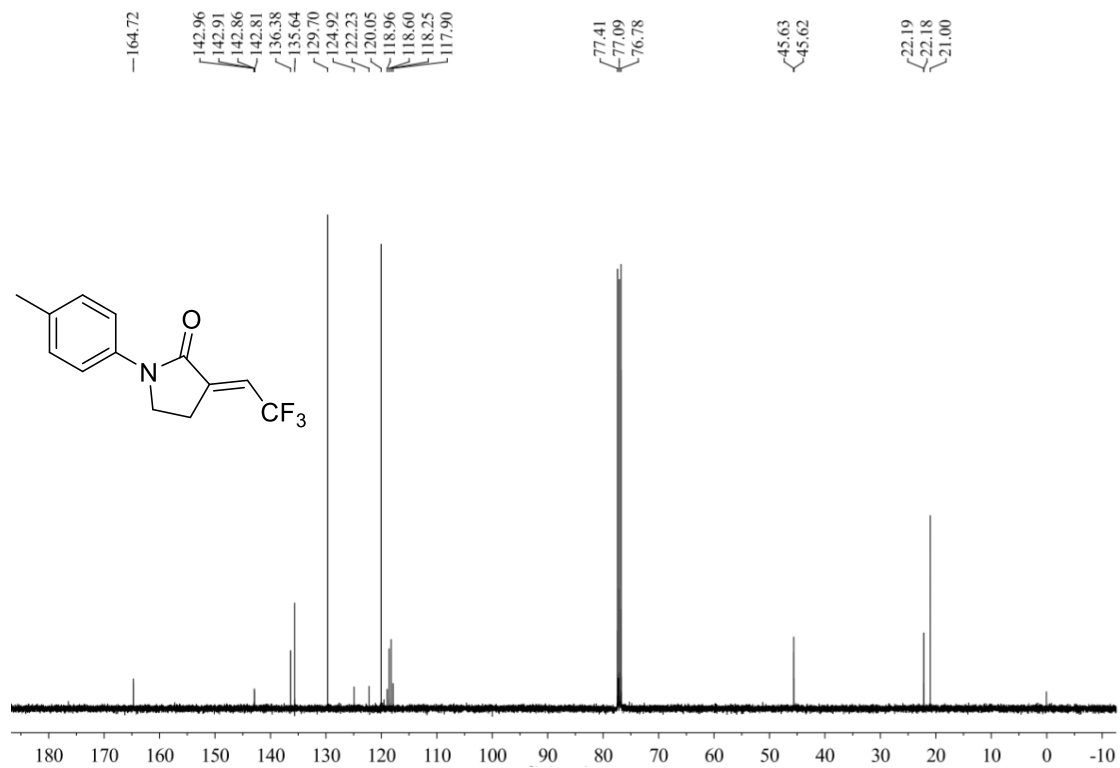



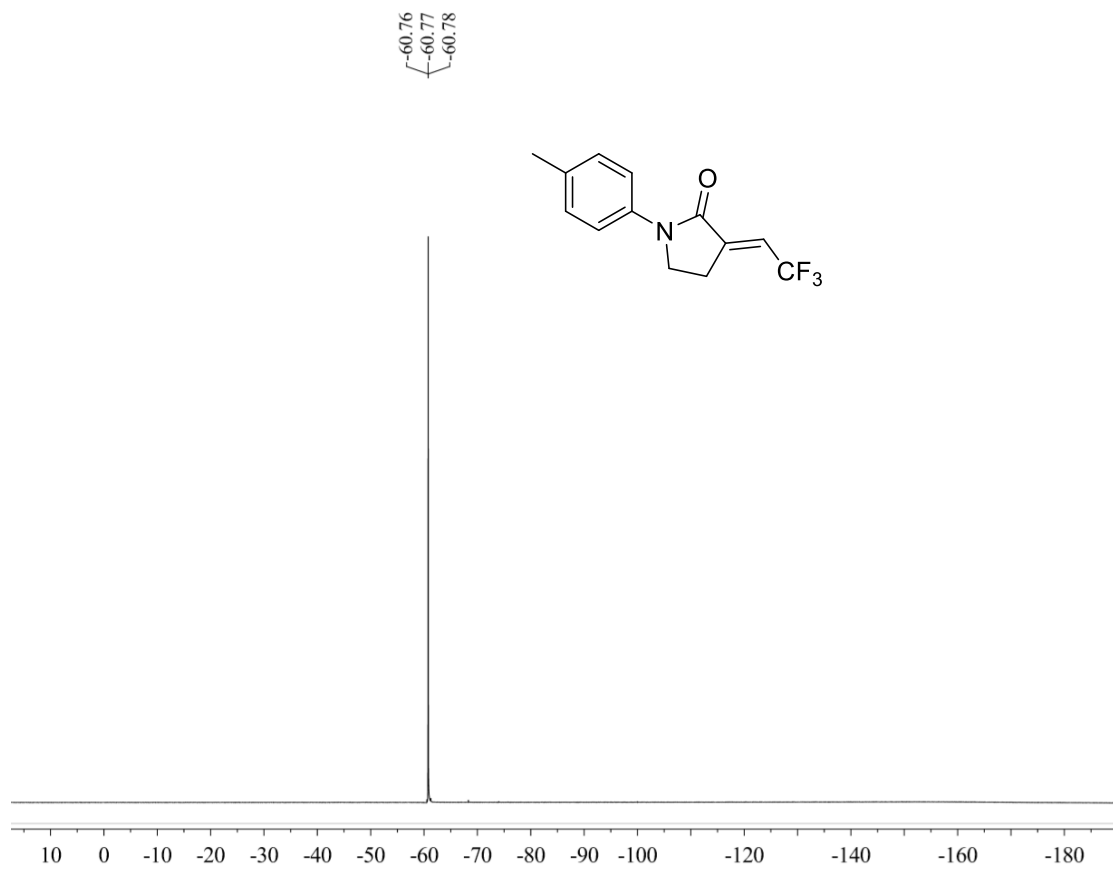

(E)-1-(4-methoxyphenyl)-3-(2,2,2-trifluoroethylidene)pyrrolidin-2-one (**1e**)

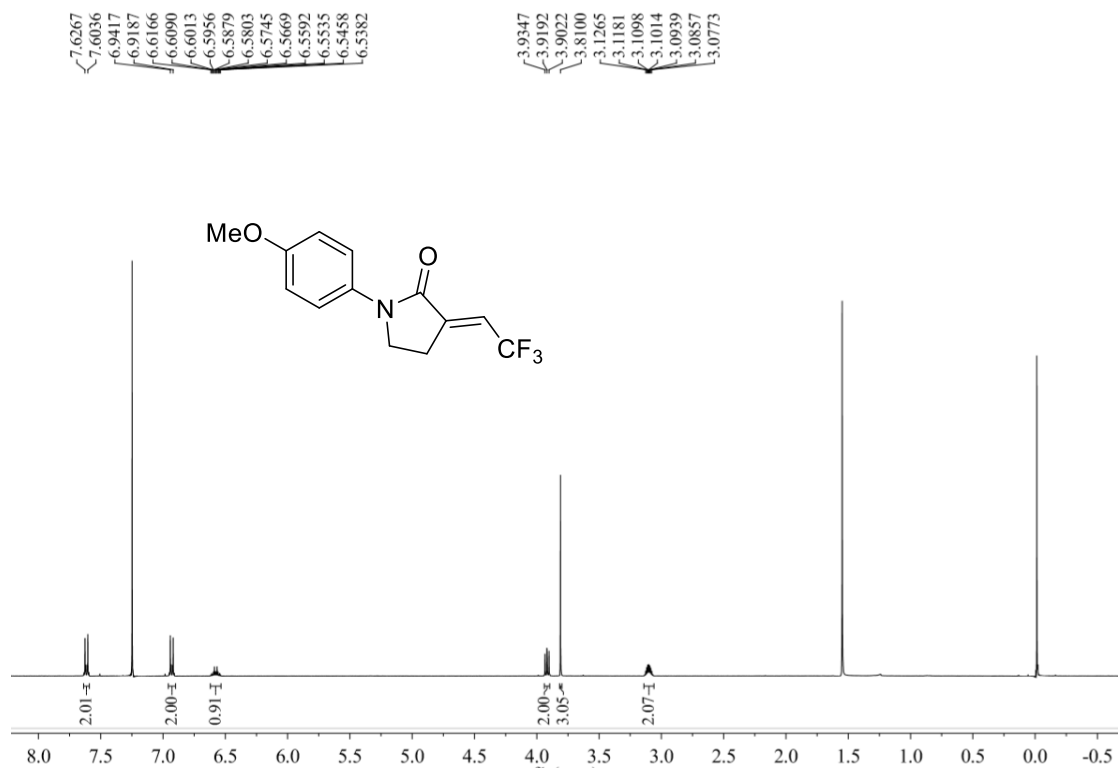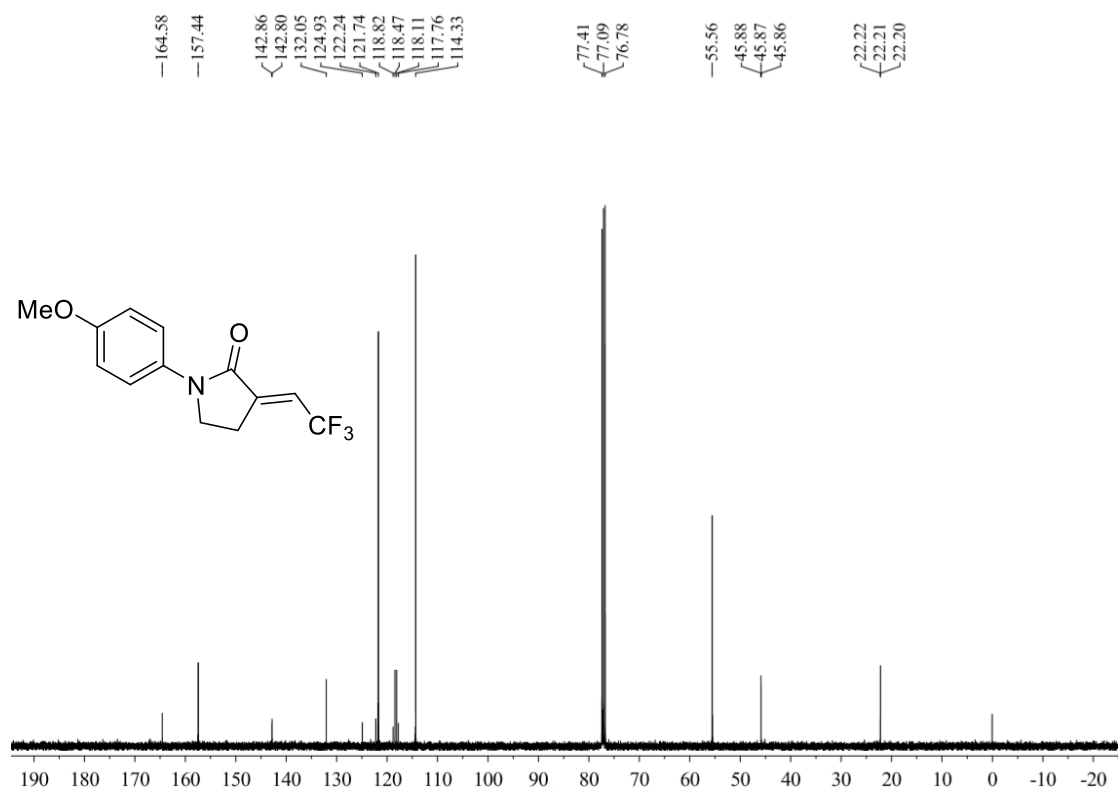

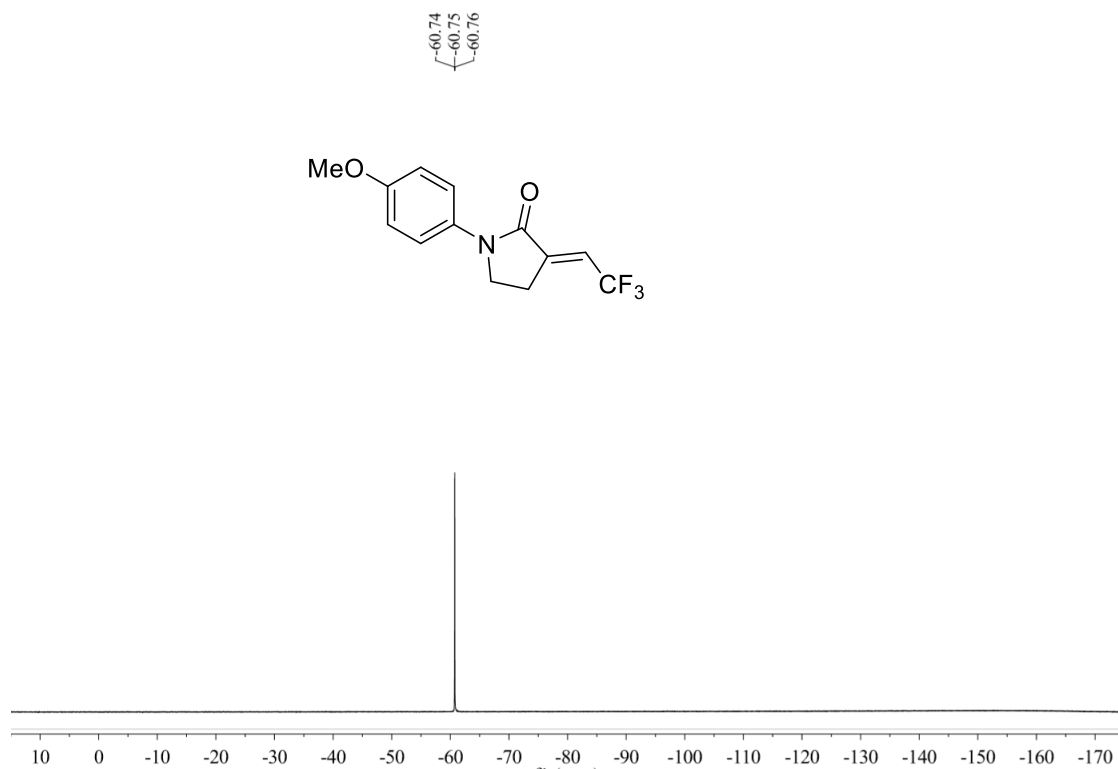

(E)-1-(3-fluorophenyl)-3-(2,2,2-trifluoroethylidene)pyrrolidin-2-one (**1f**)

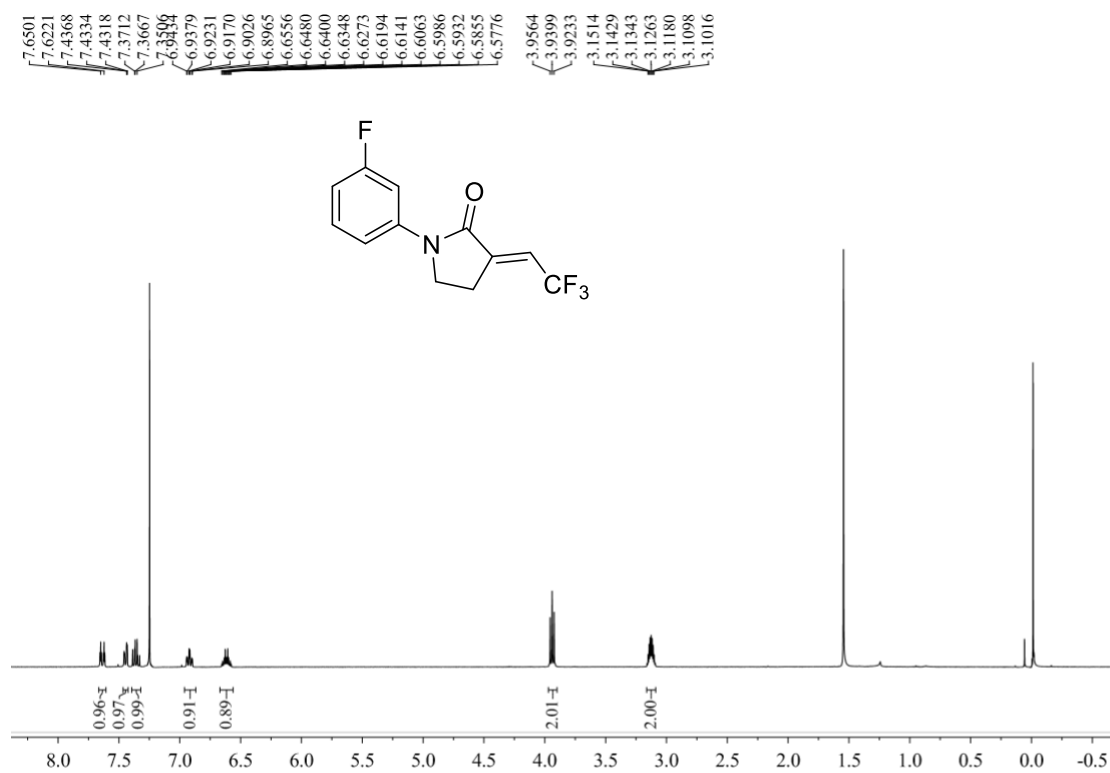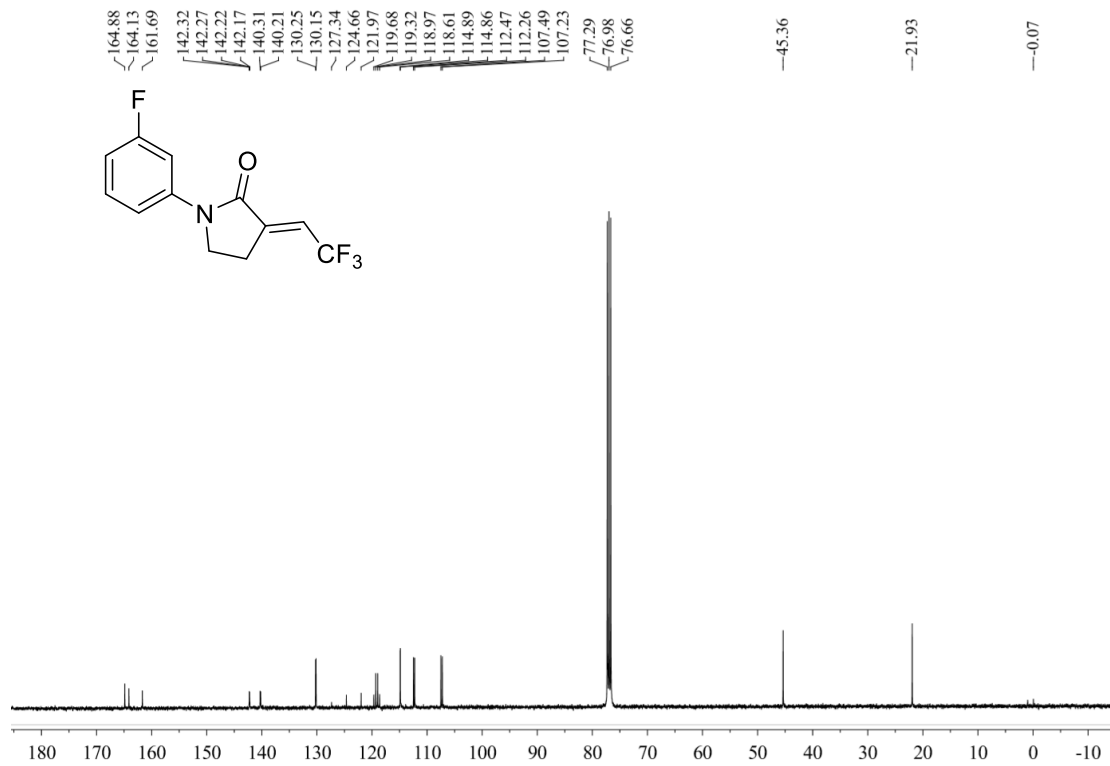

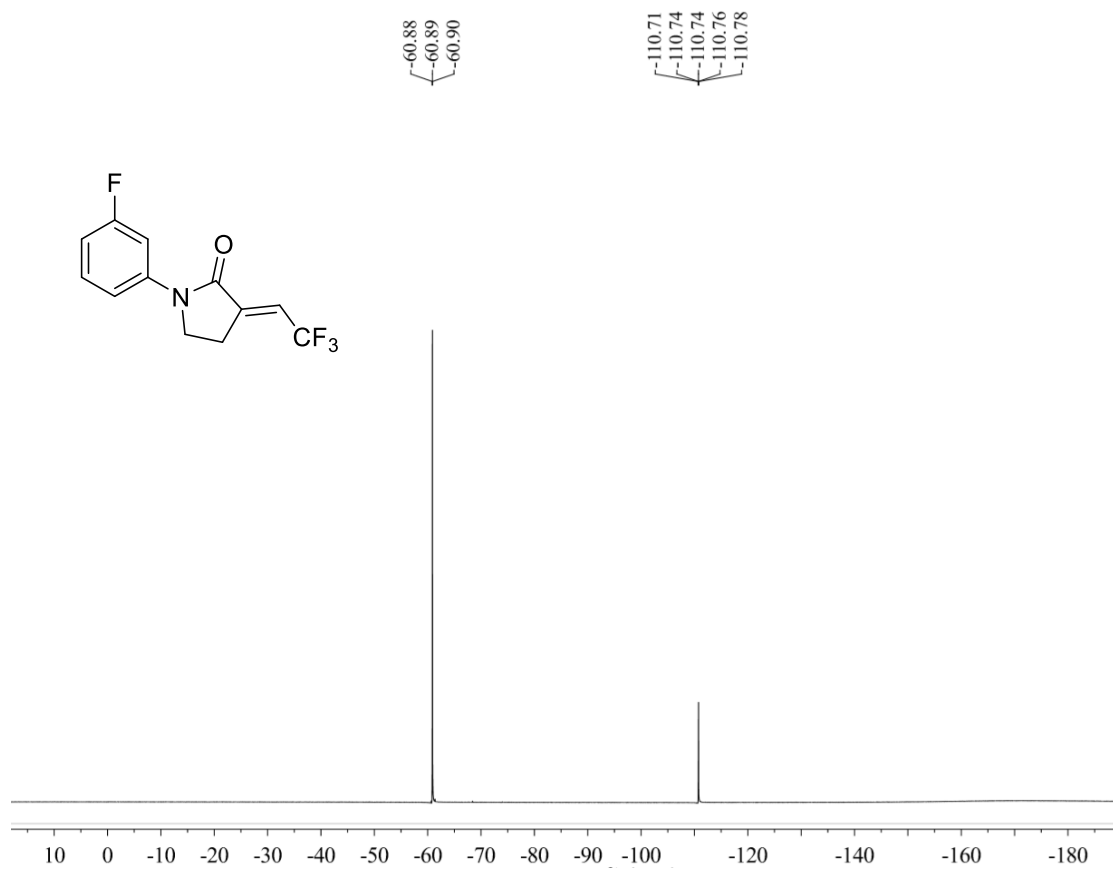

(E)-1-(4-fluorophenyl)-3-(2,2,2-trifluoroethylidene)pyrrolidin-2-one (**1g**)

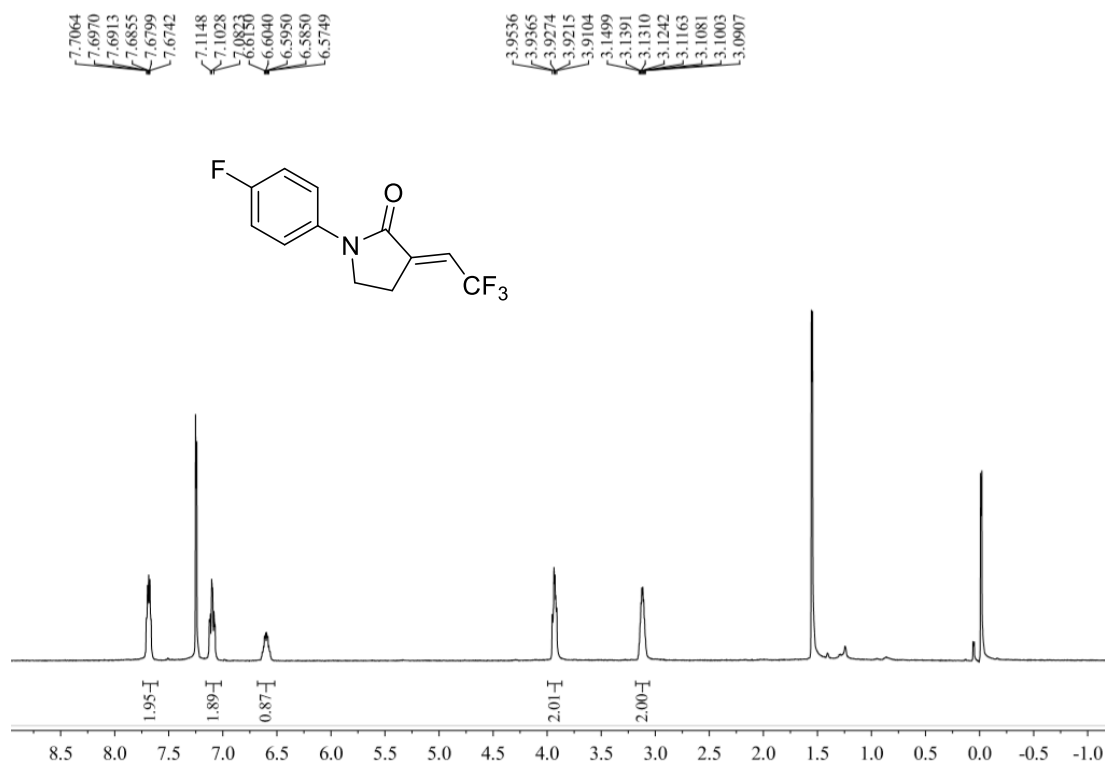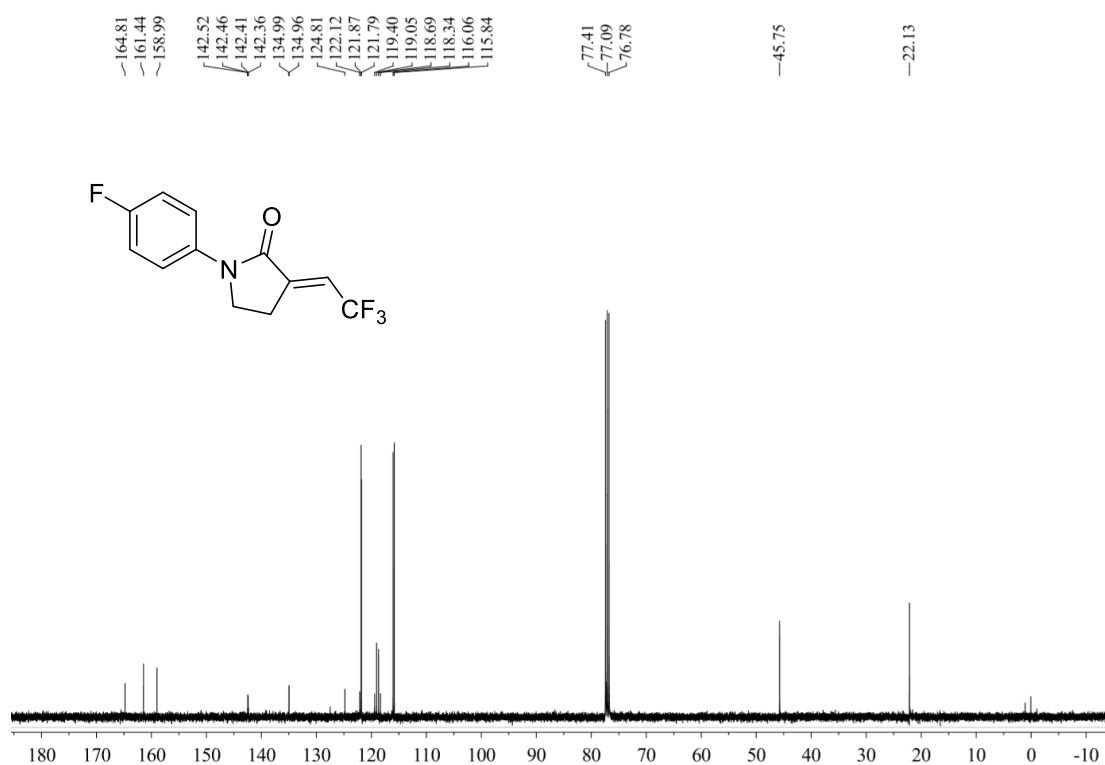

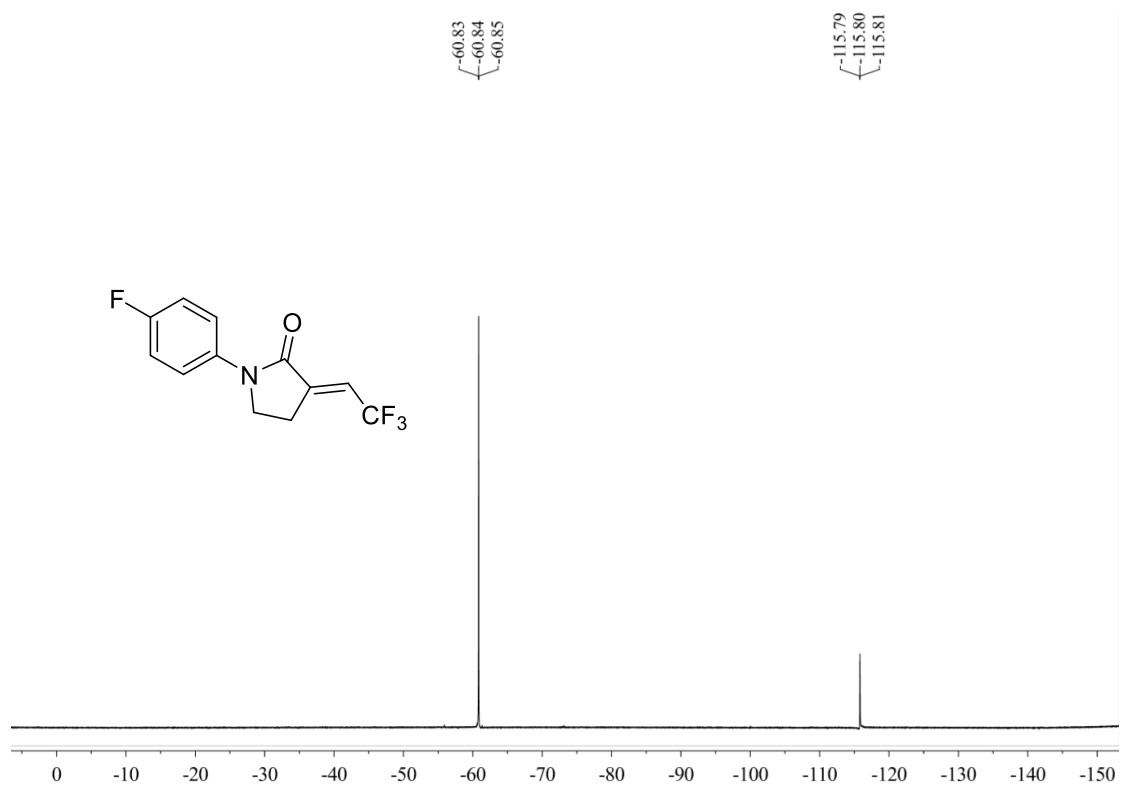

(*E*)-1-(3-bromophenyl)-3-(2,2,2-trifluoroethylidene)pyrrolidin-2-one (**1h**)

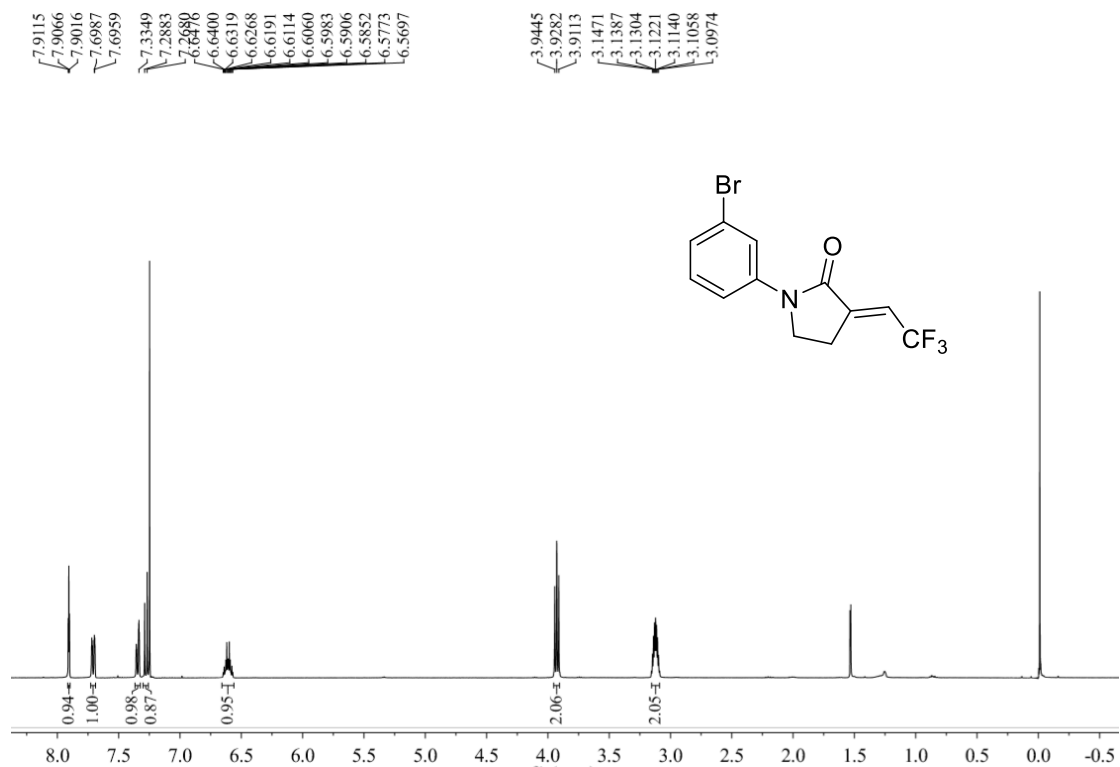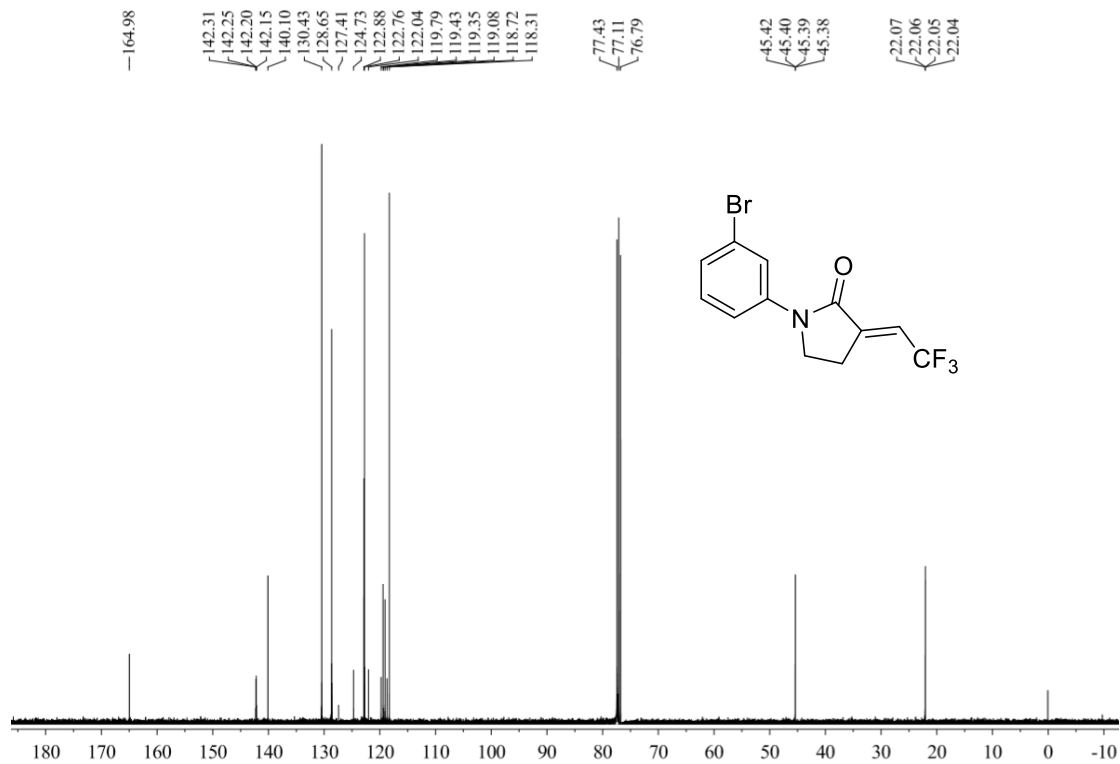



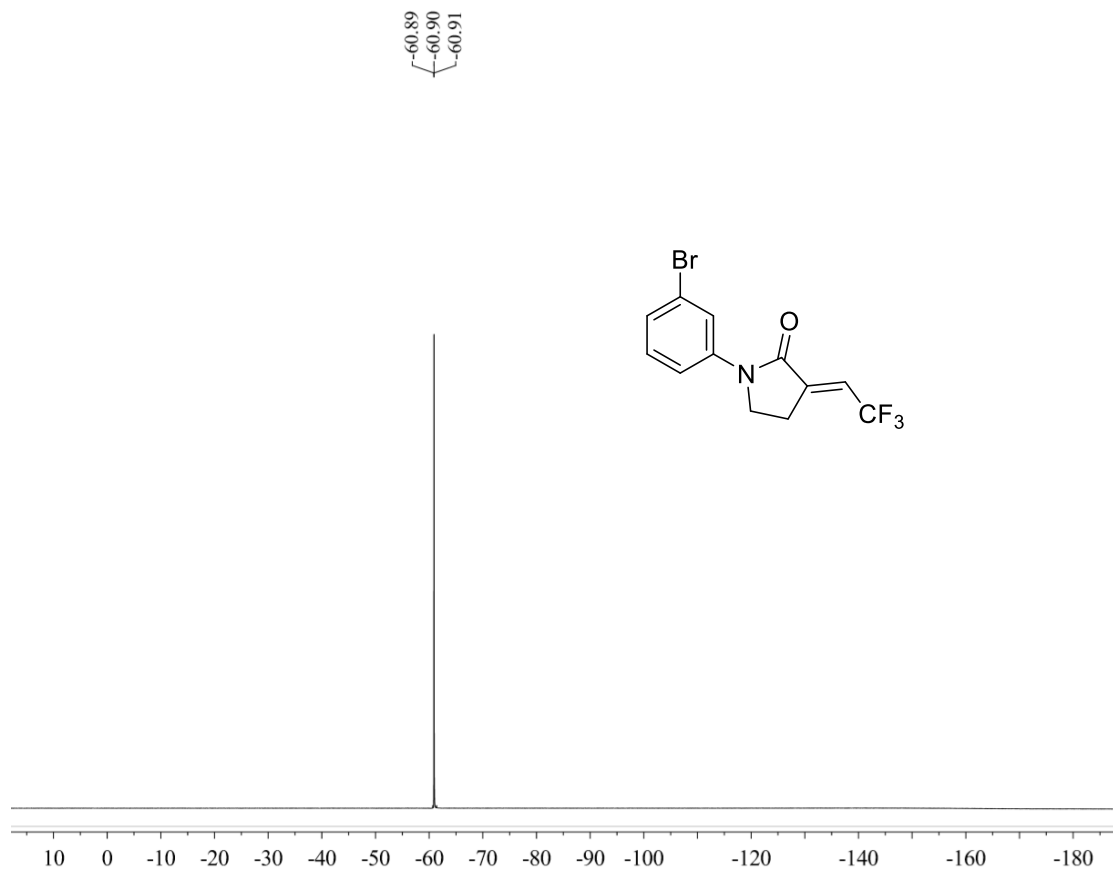

(E)-1-(4-(*tert*-butyl)phenyl)-3-(2,2-trifluoroethylidene)pyrrolidin-2-one (**1i**)

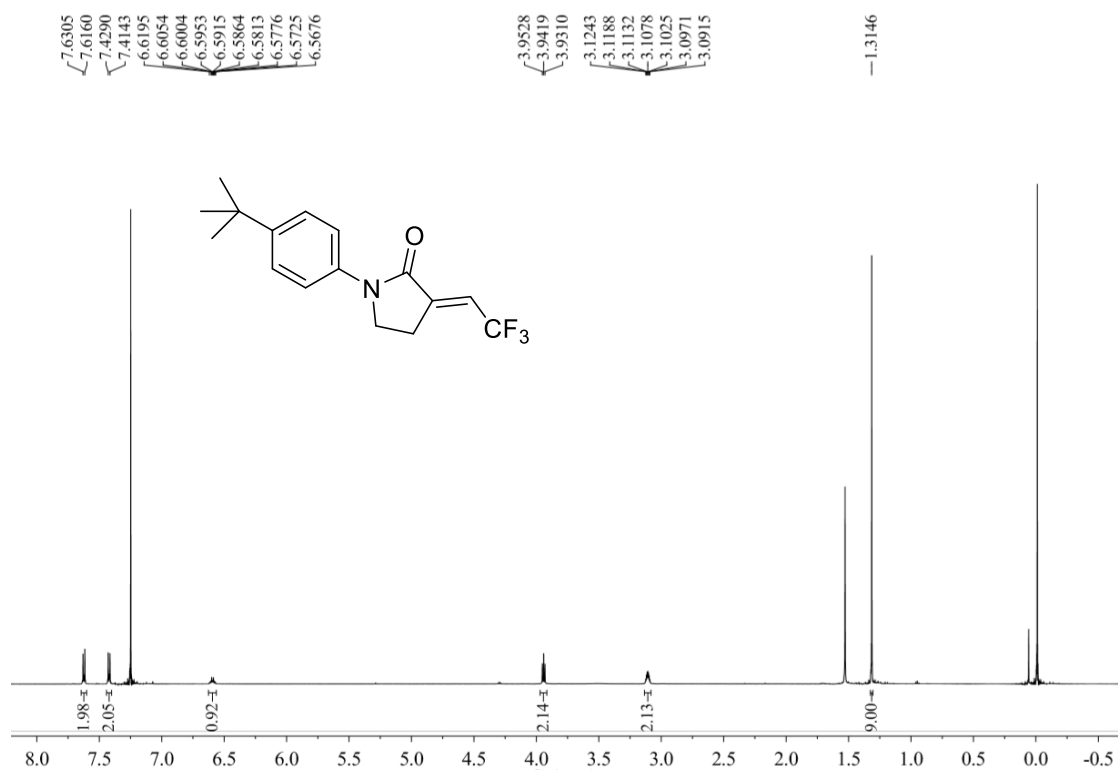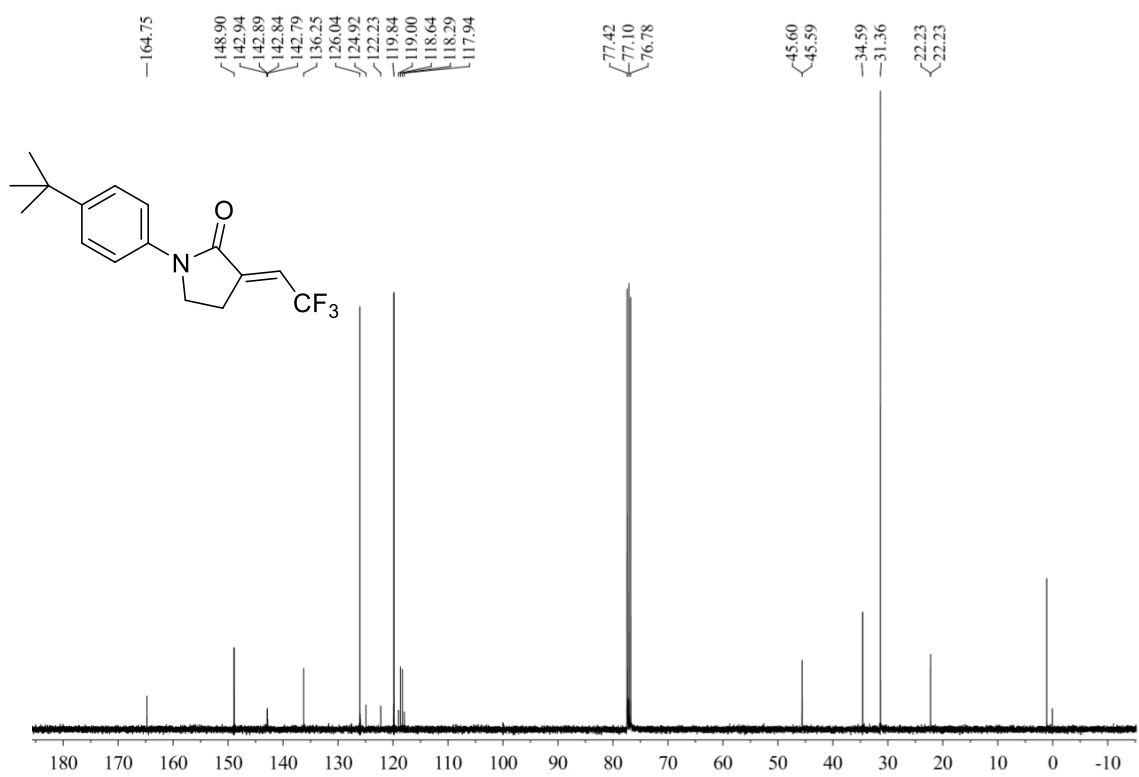

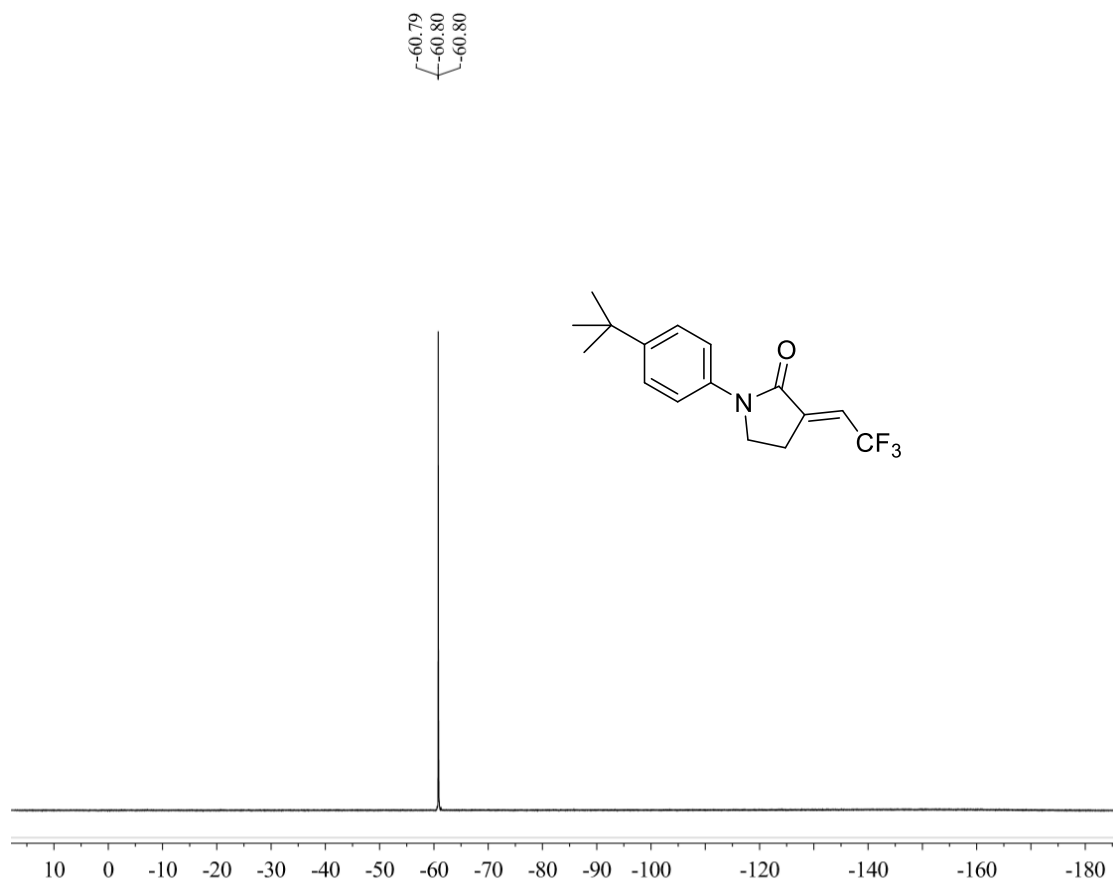

(E)-1-(3-nitrophenyl)-3-(2,2,2-trifluoroethylidene)pyrrolidin-2-one (**1j**)

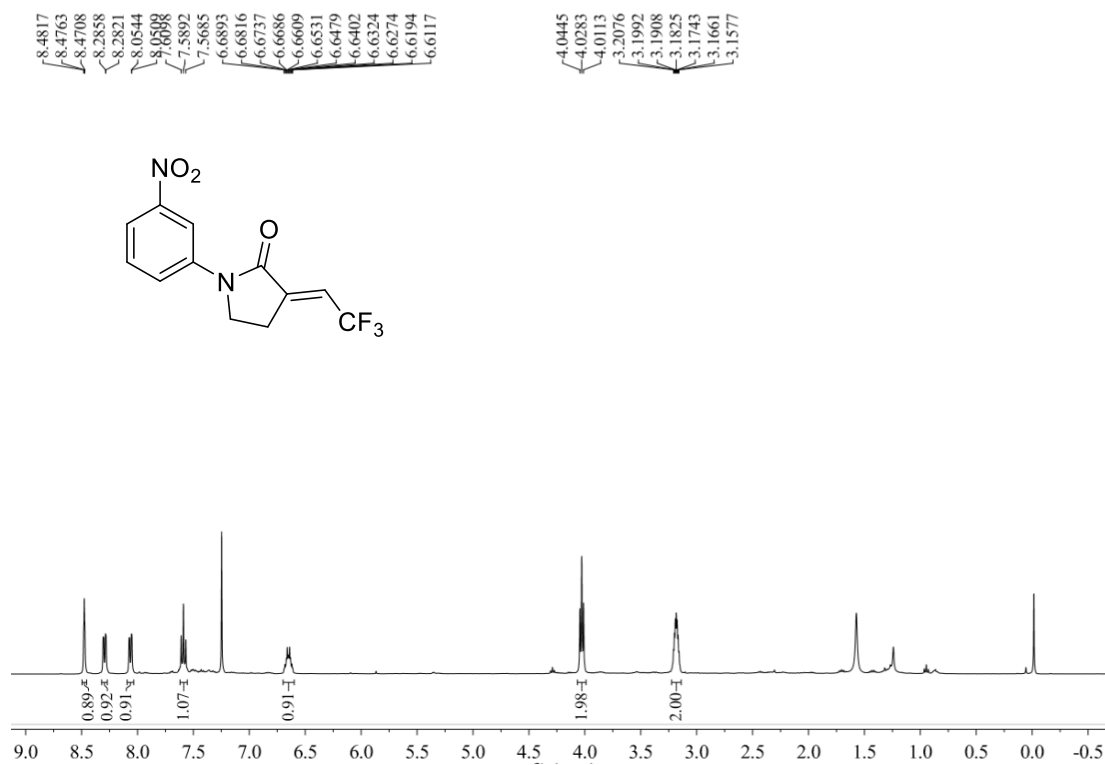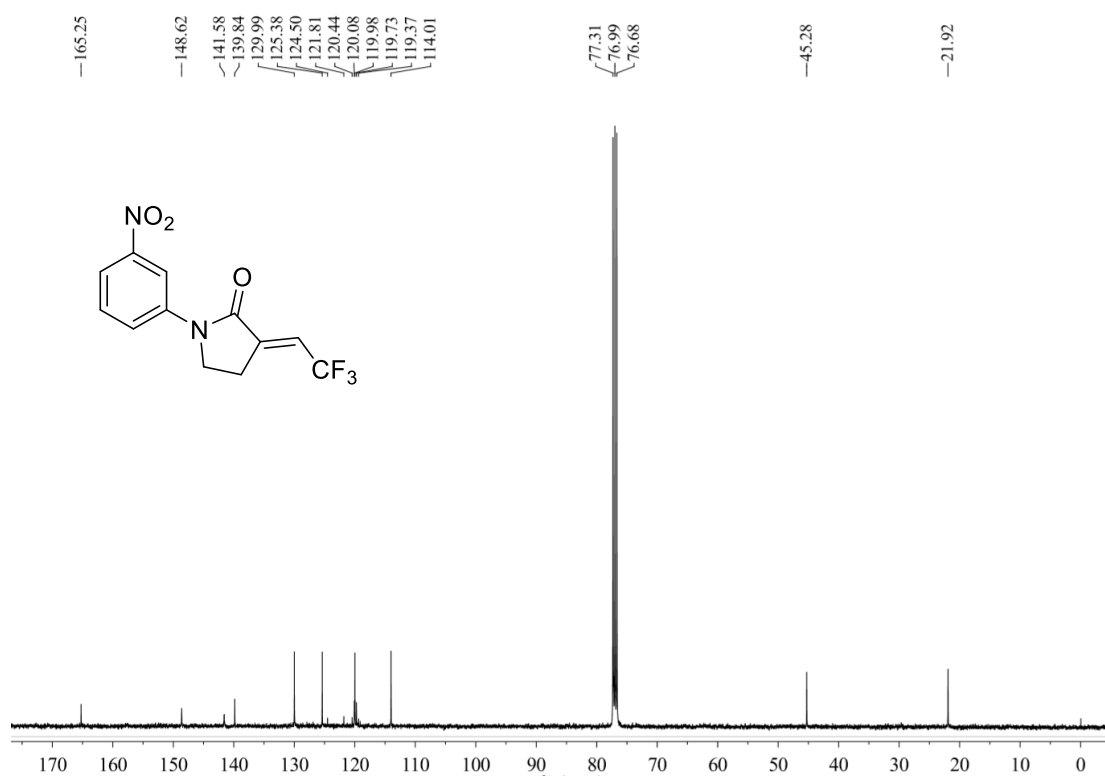

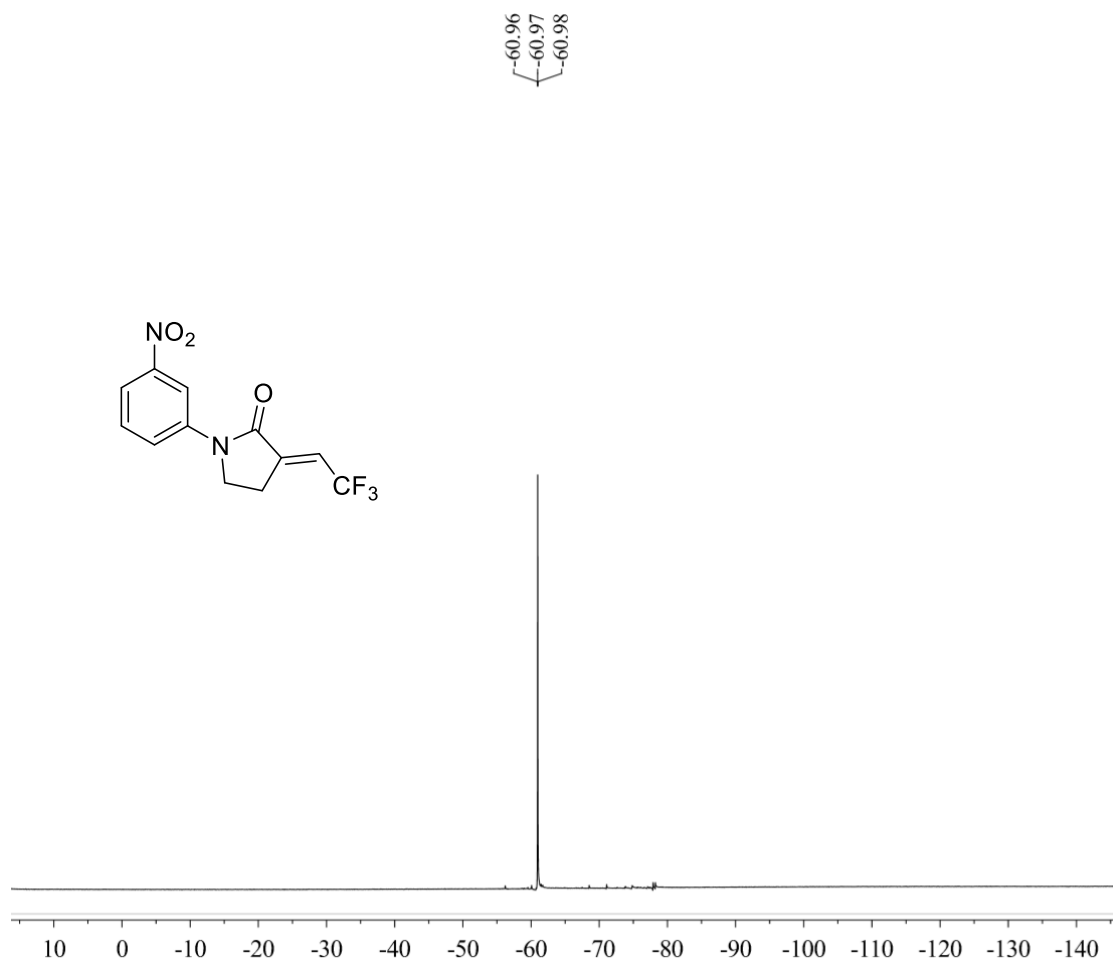

(E)-1-(3,5-dimethylphenyl)-3-(2,2,2-trifluoroethylidene)pyrrolidin-2-one (**1k**)

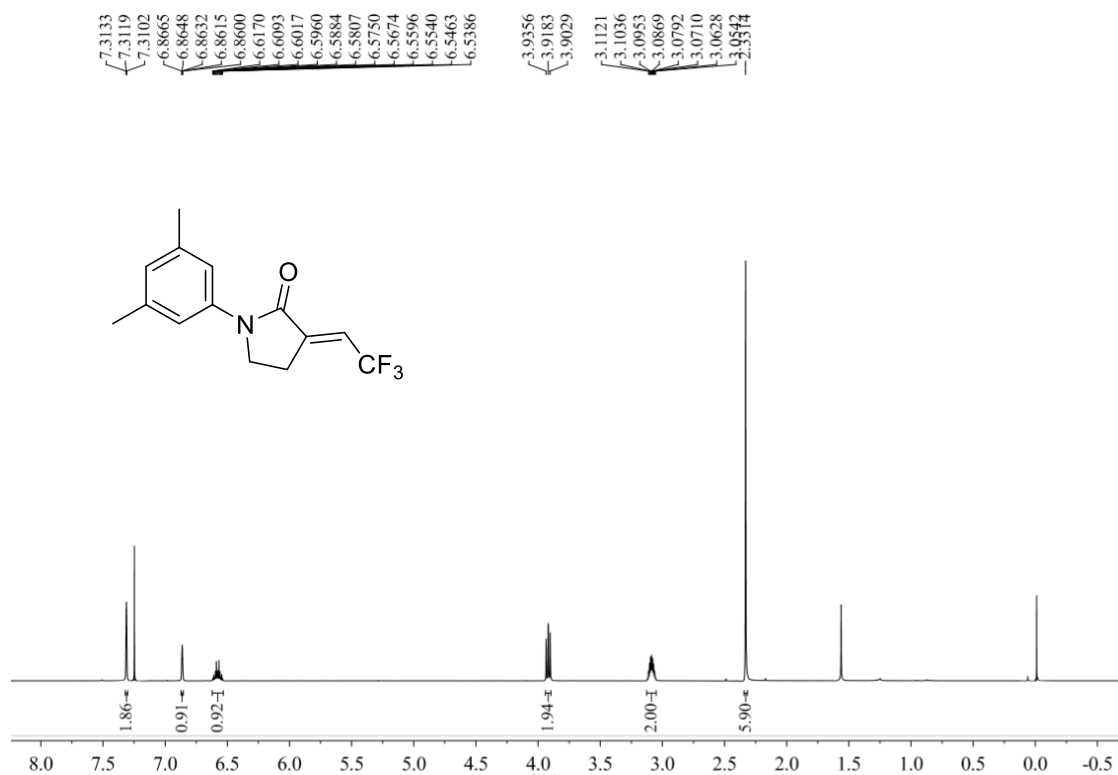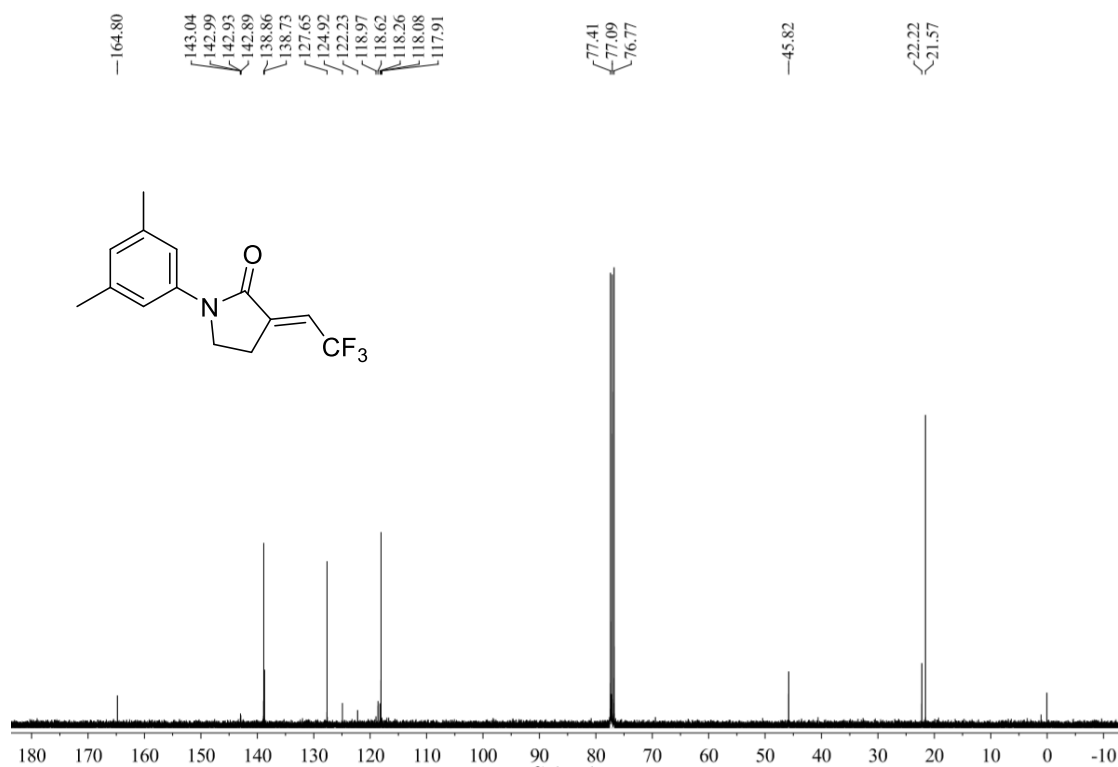

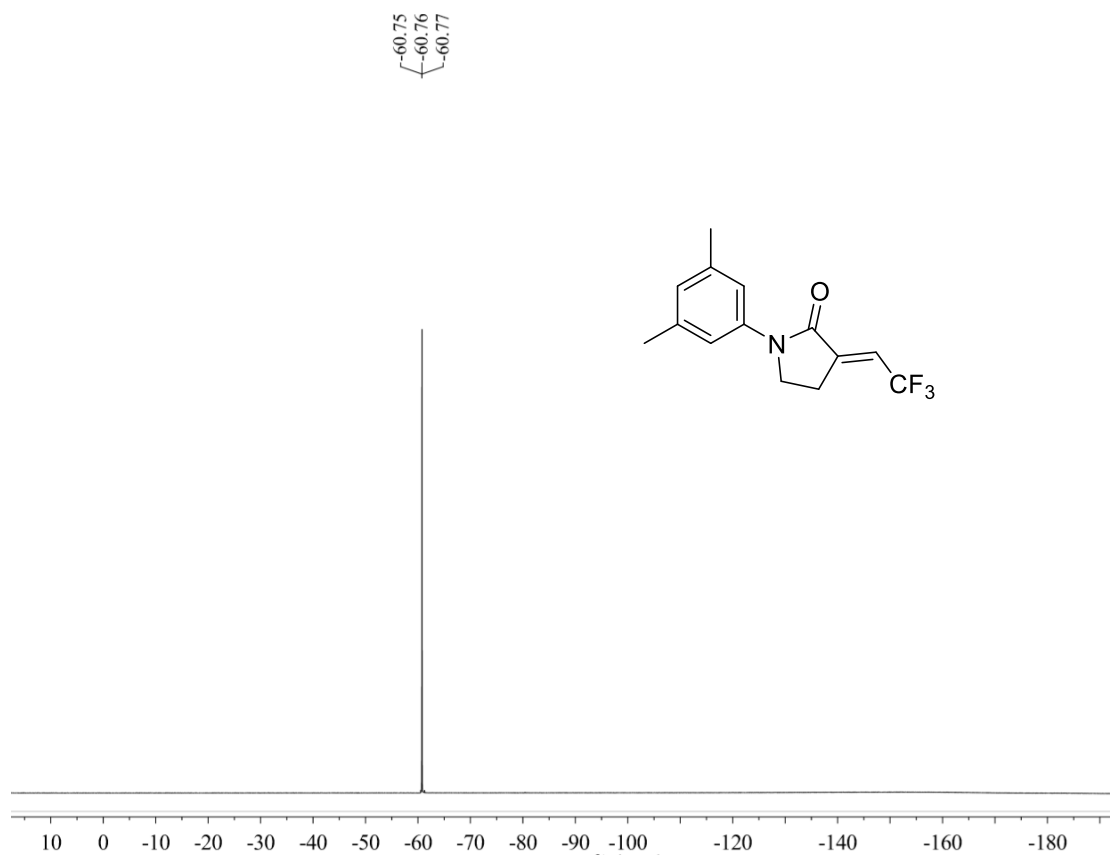

(E)-1-(3,4-dimethylphenyl)-3-(2,2,2-trifluoroethylidene)pyrrolidin-2-one (**11**)

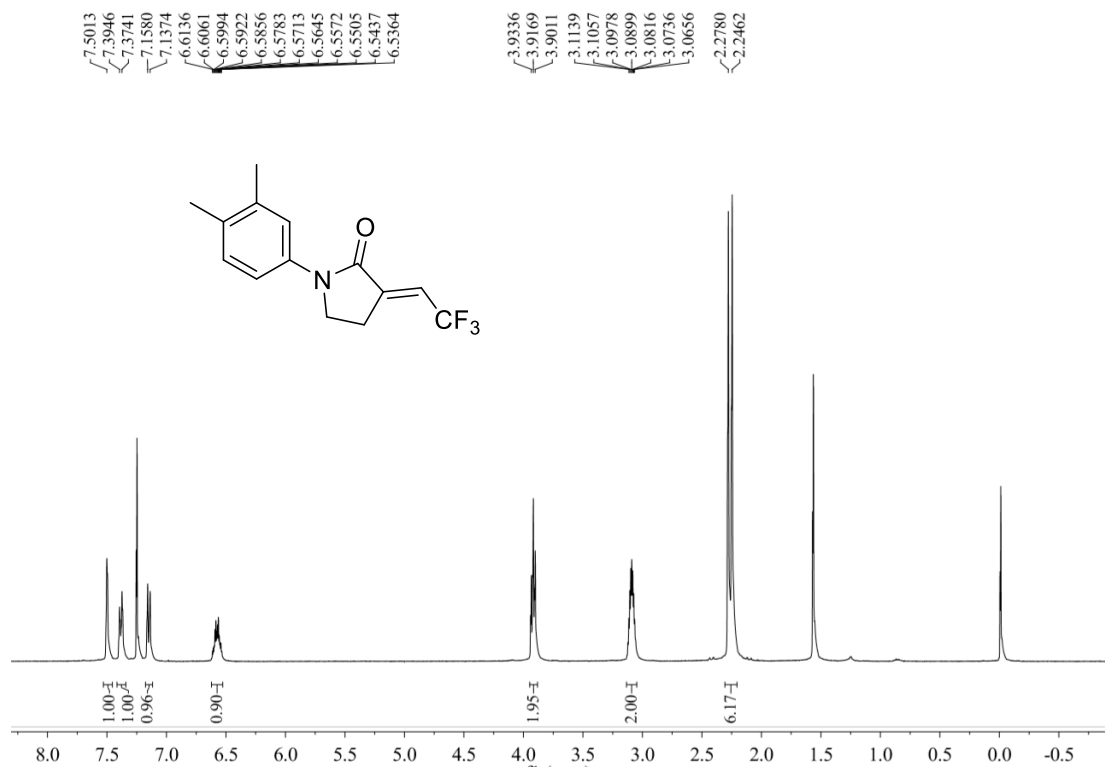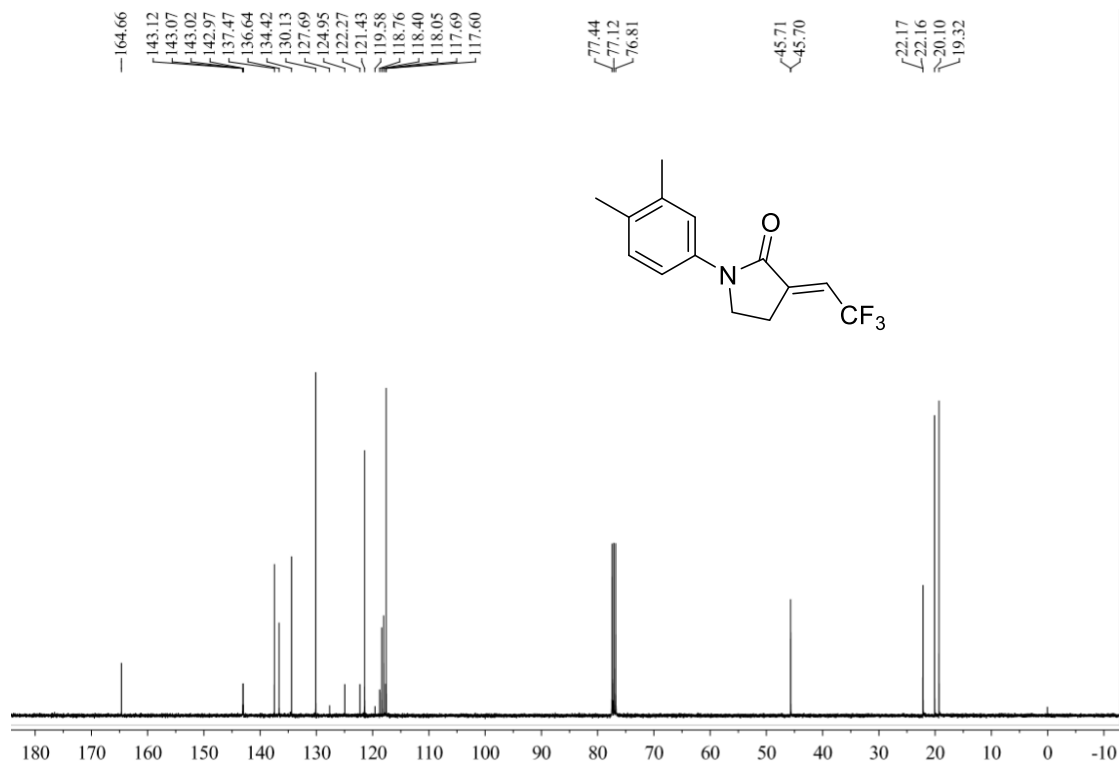



-60.74  
-60.75  
-60.76

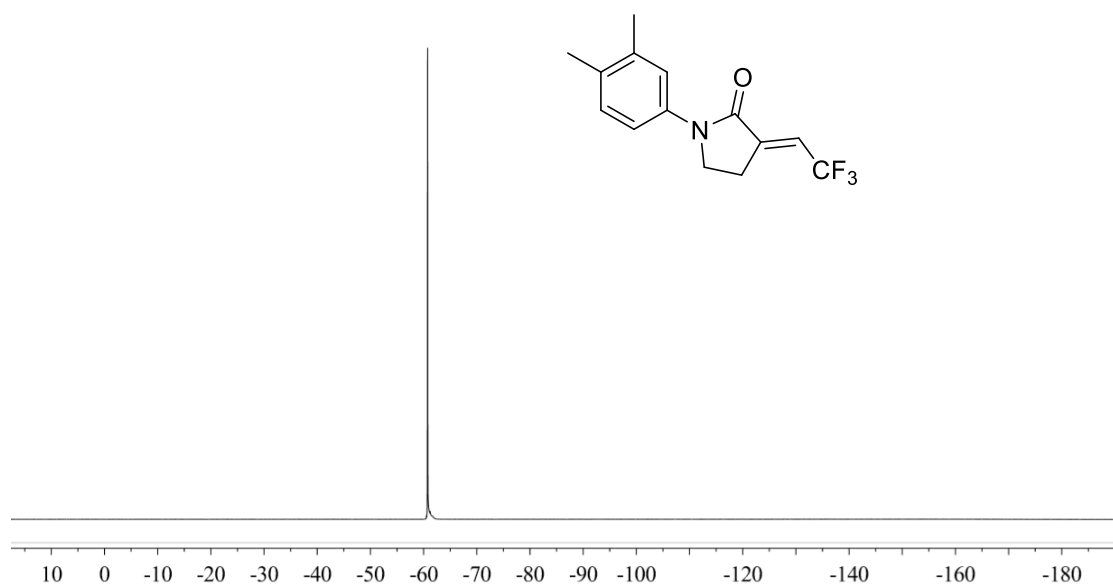

(E)-1-(3,5-dimethoxyphenyl)-3-(2,2,2-trifluoroethylidene)pyrrolidin-2-one (**1m**)

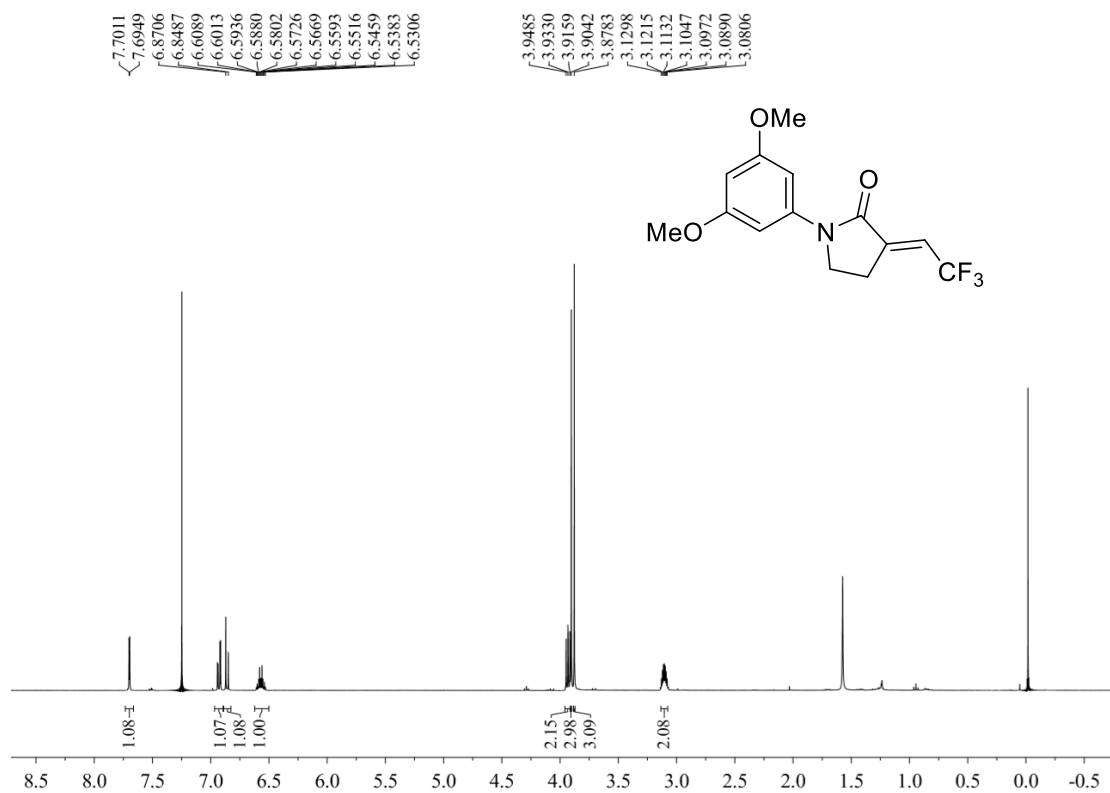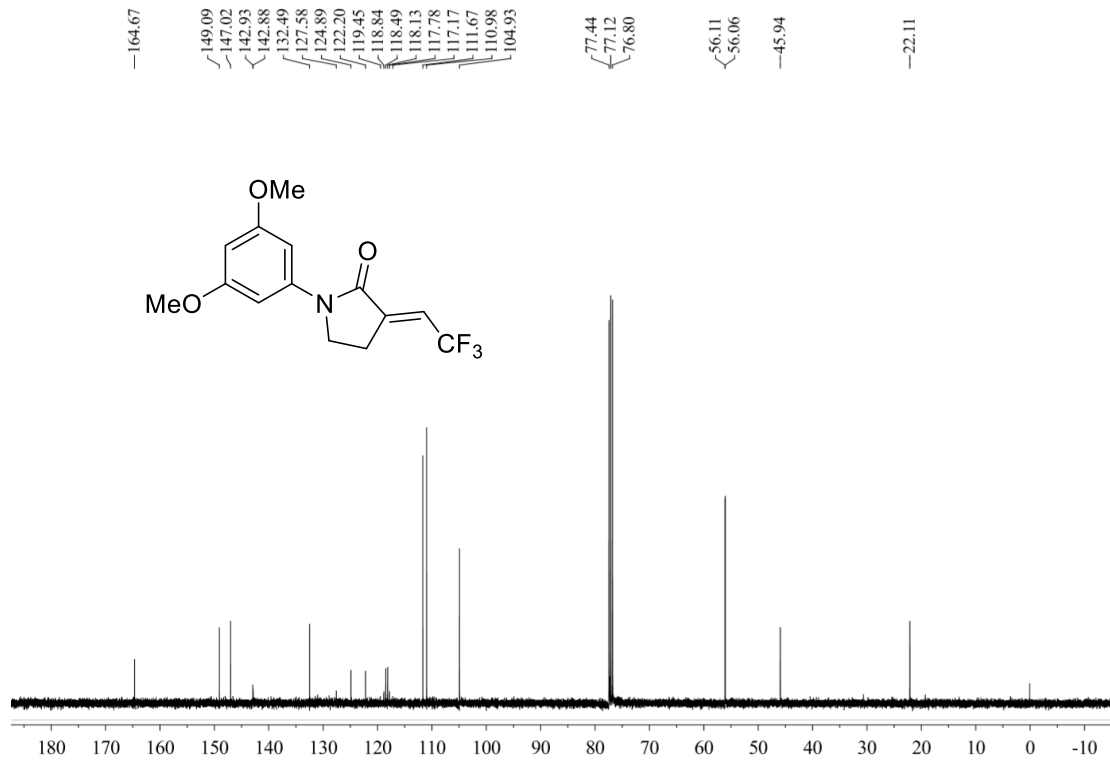

-60.77  
-60.78

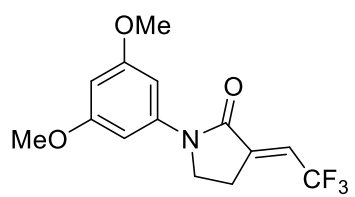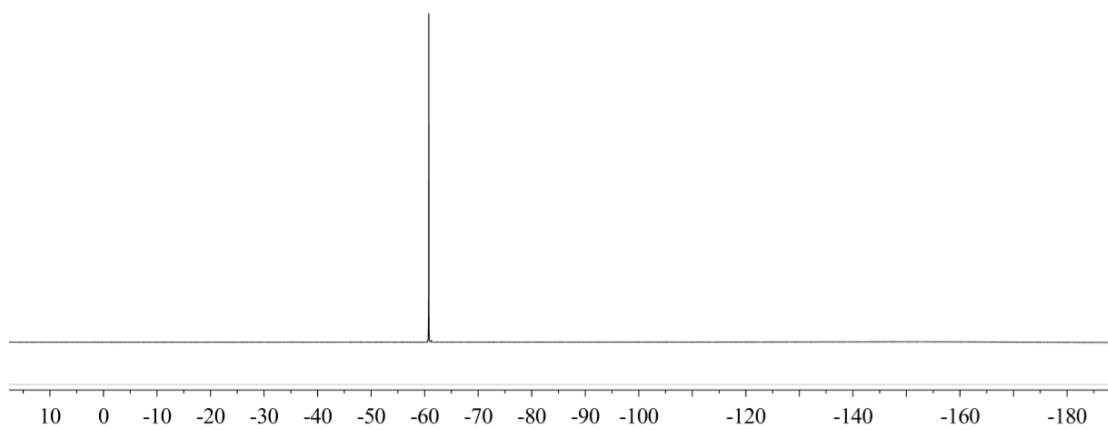

*(E)*-1-(3,5-dichlorophenyl)-3-(2,2,2-trifluoroethylidene)pyrrolidin-2-one (**1n**)

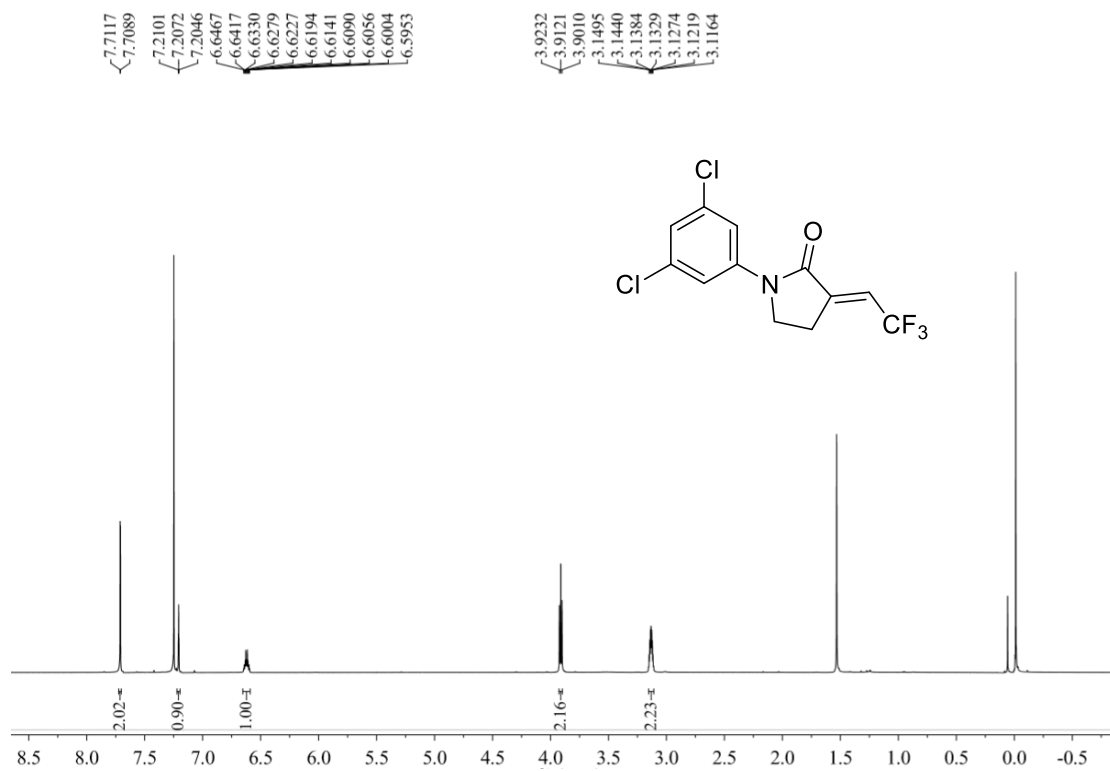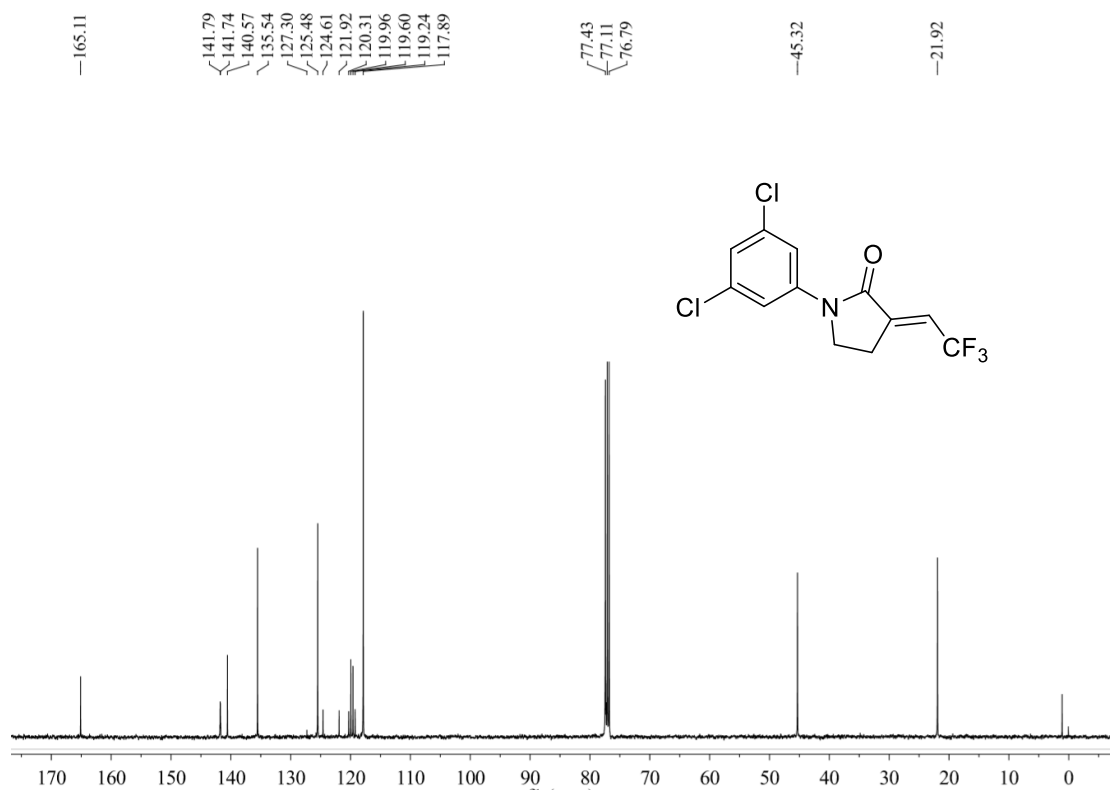

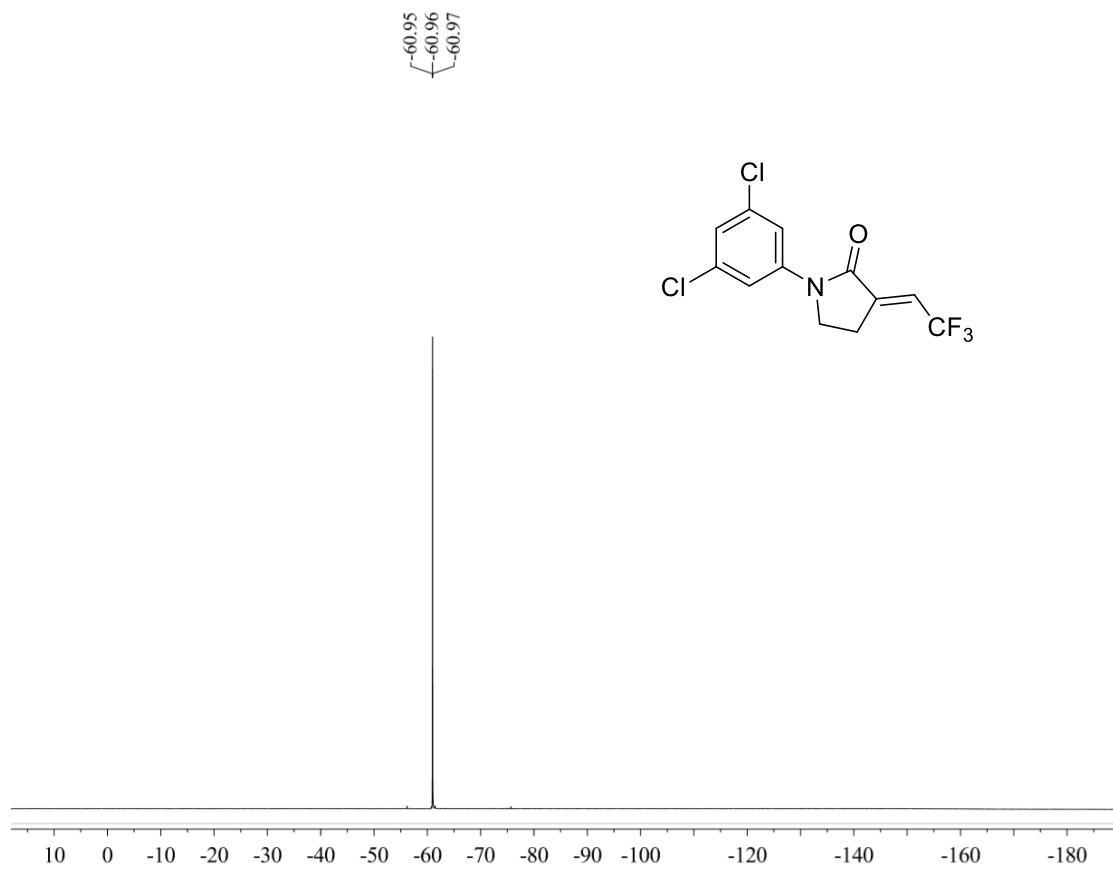

(E)-1-(3,4-dichlorophenyl)-3-(2,2,2-trifluoroethylidene)pyrrolidin-2-one (**1o**)

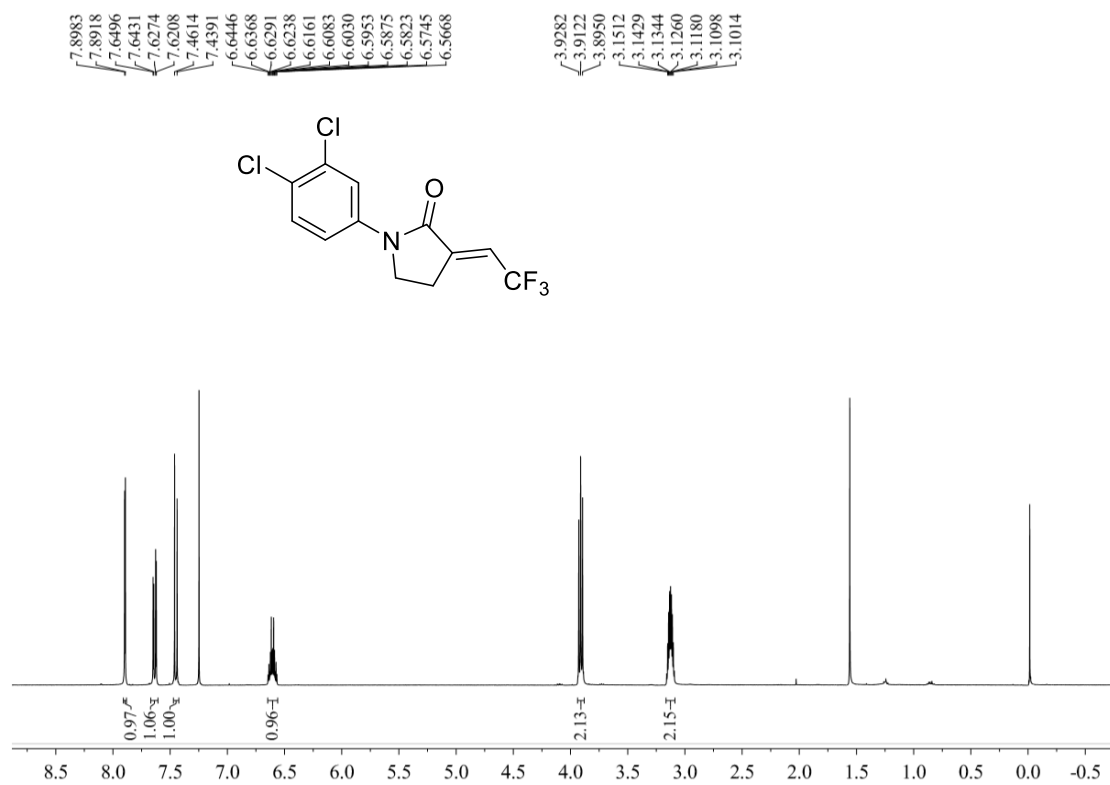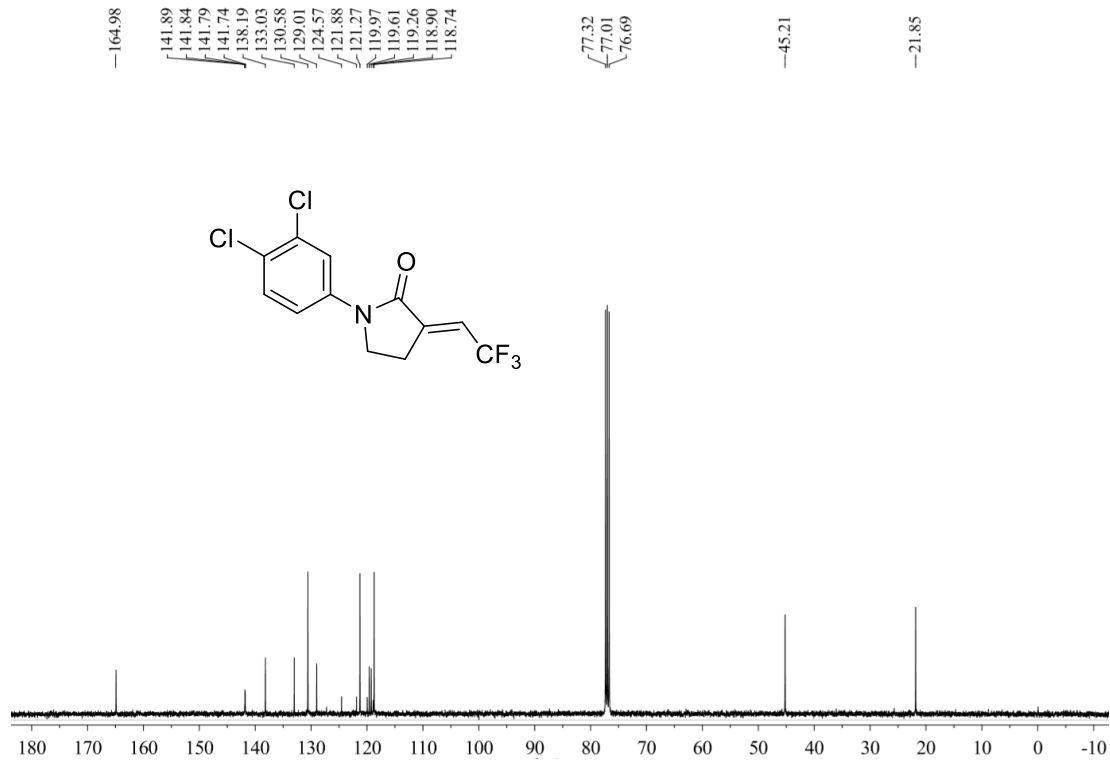

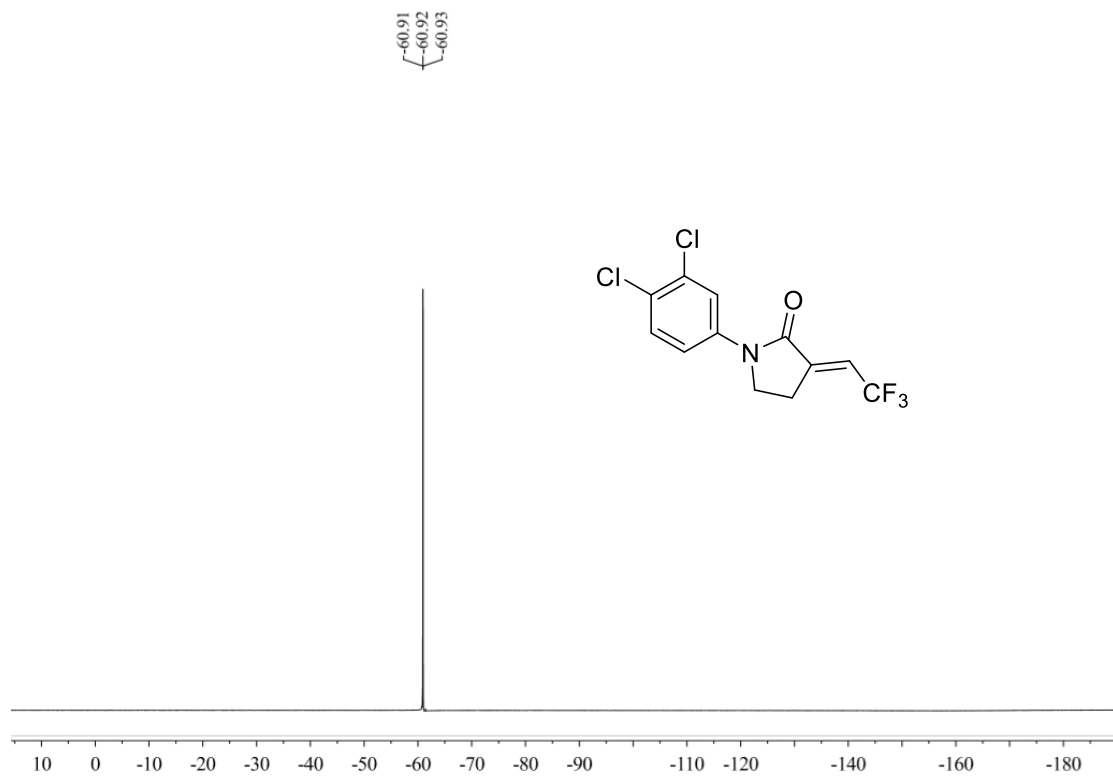

(E)-1-(naphthalen-1-yl)-3-(2,2,2-trifluoroethylidene)pyrrolidin-2-one (**1p**)

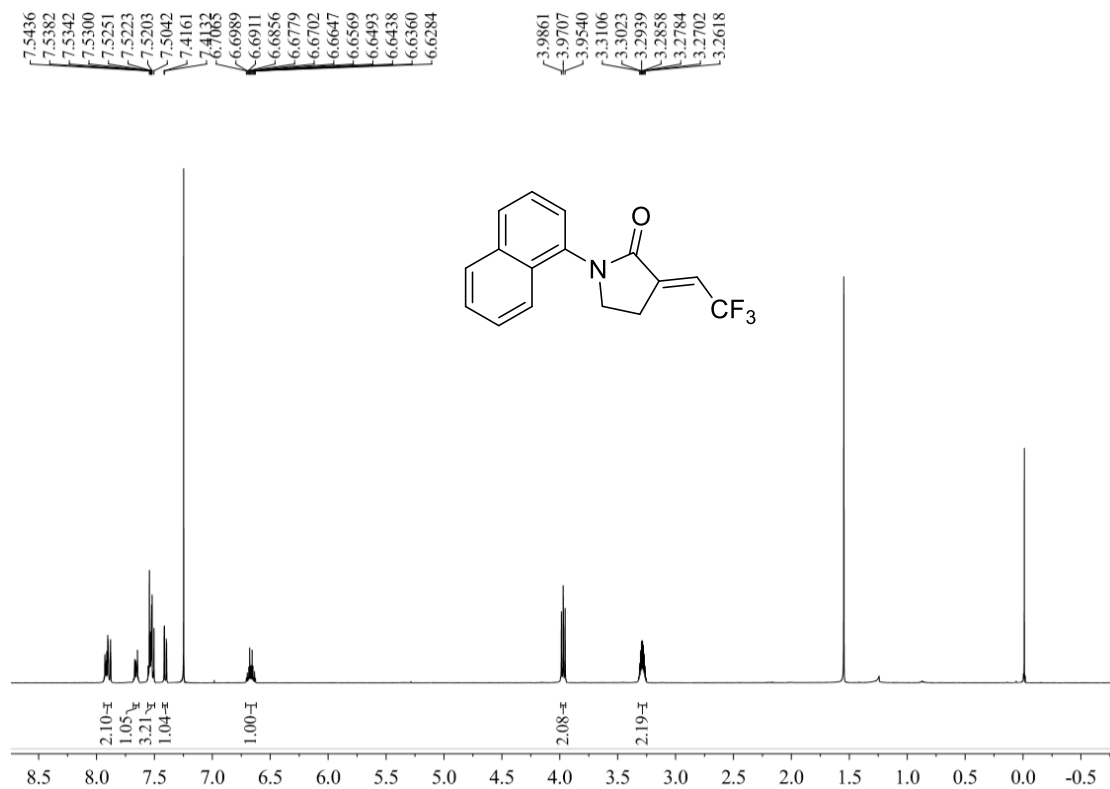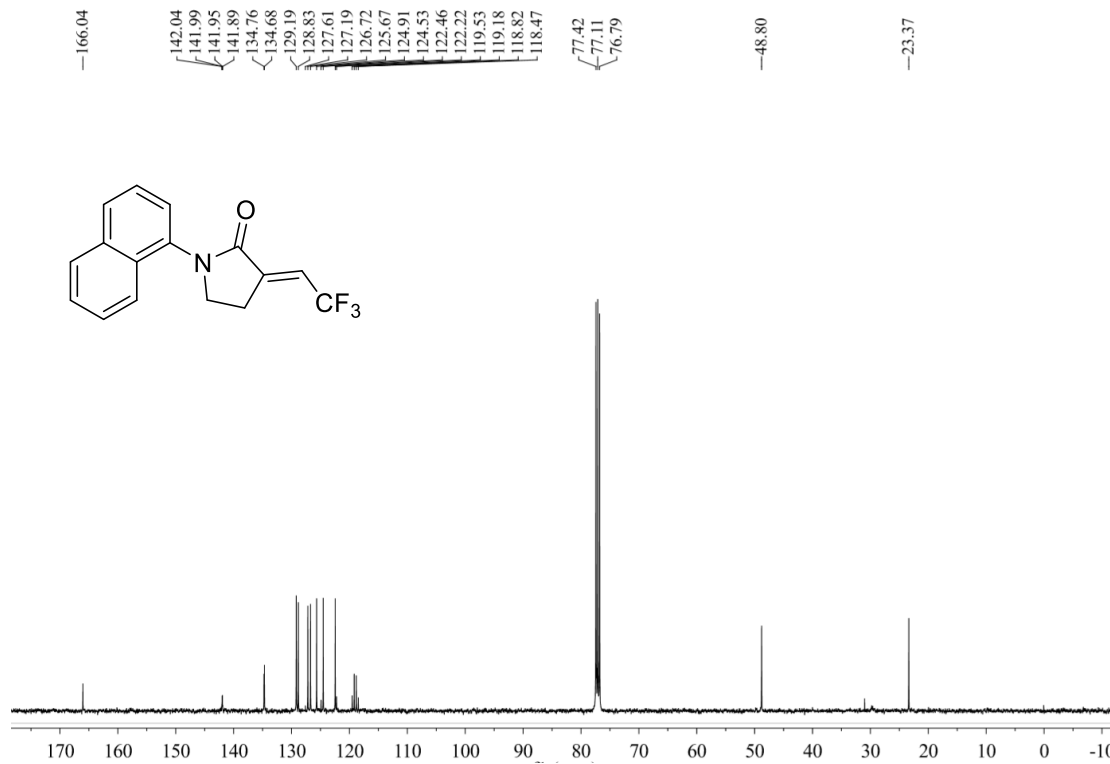



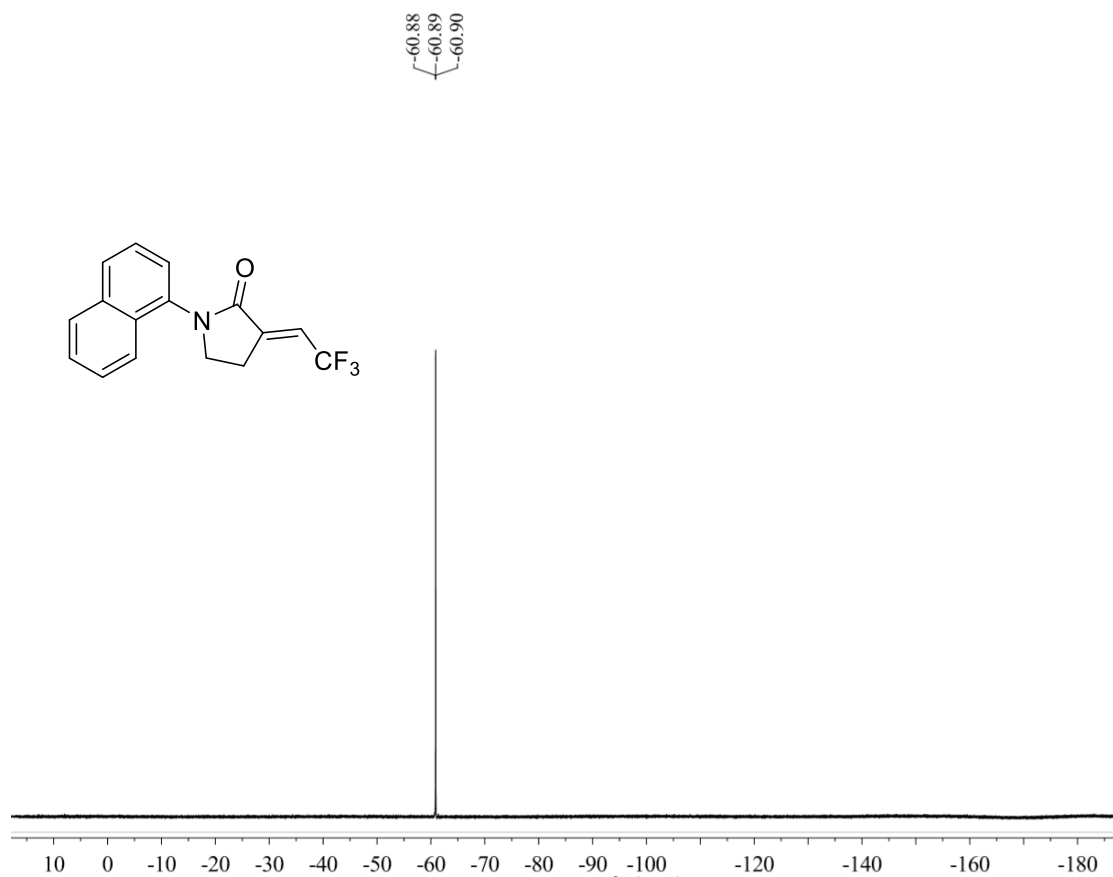

(*E*)-1-methyl-3-(2,2,2-trifluoroethylidene)pyrrolidin-2-one (**1q**)

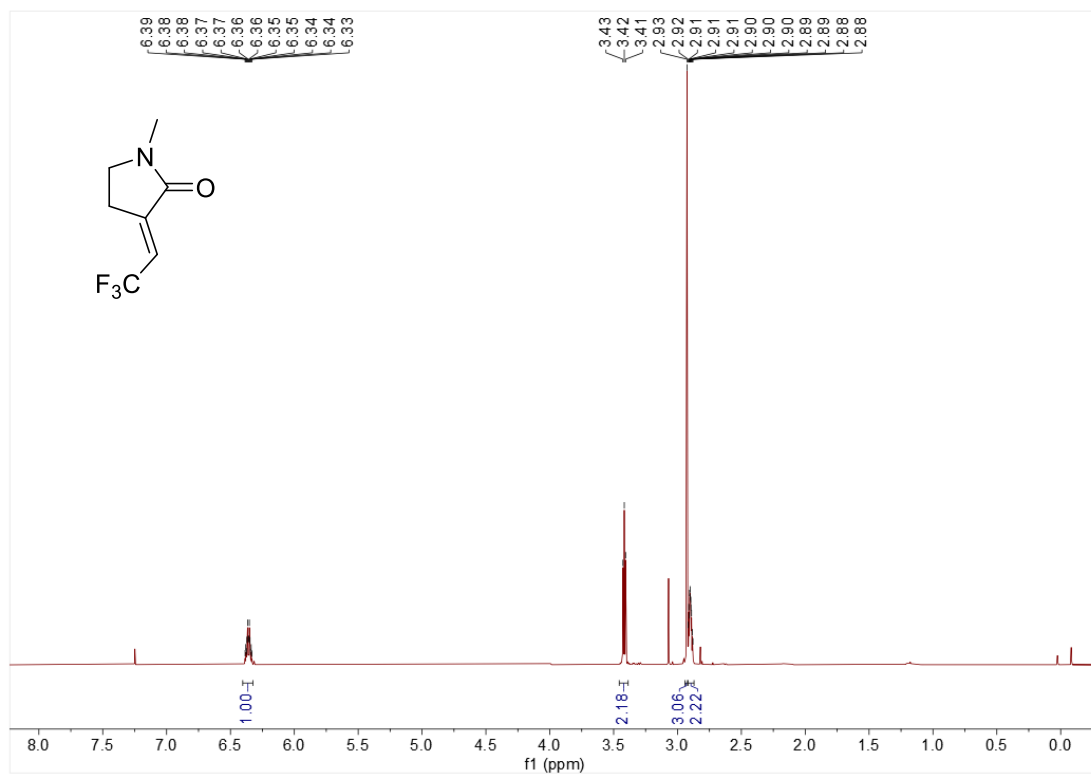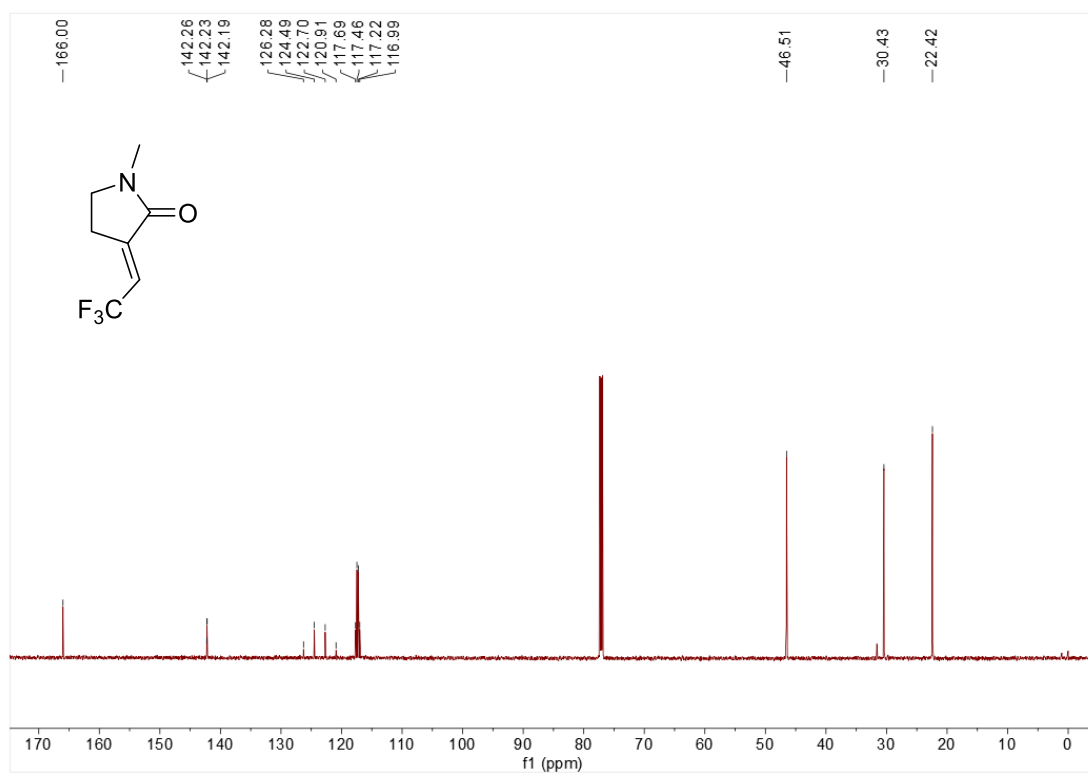

(*E*)-1-benzyl-3-(2,2,2-trifluoroethylidene)pyrrolidin-2-one (**1r**)

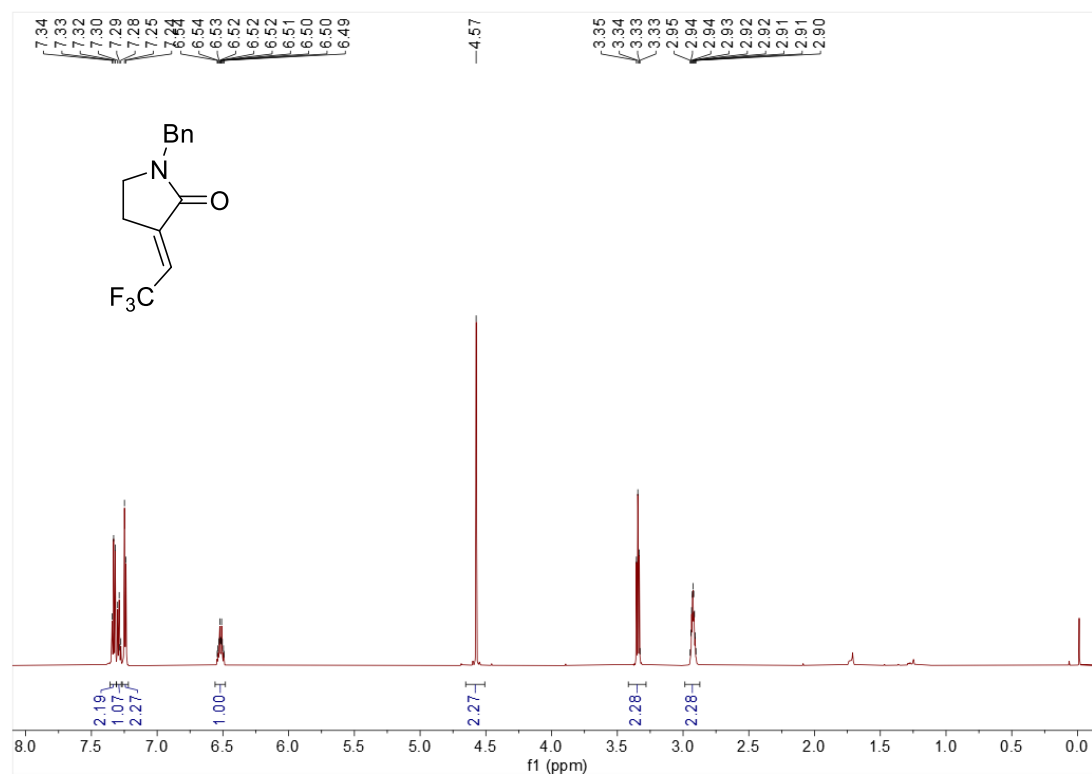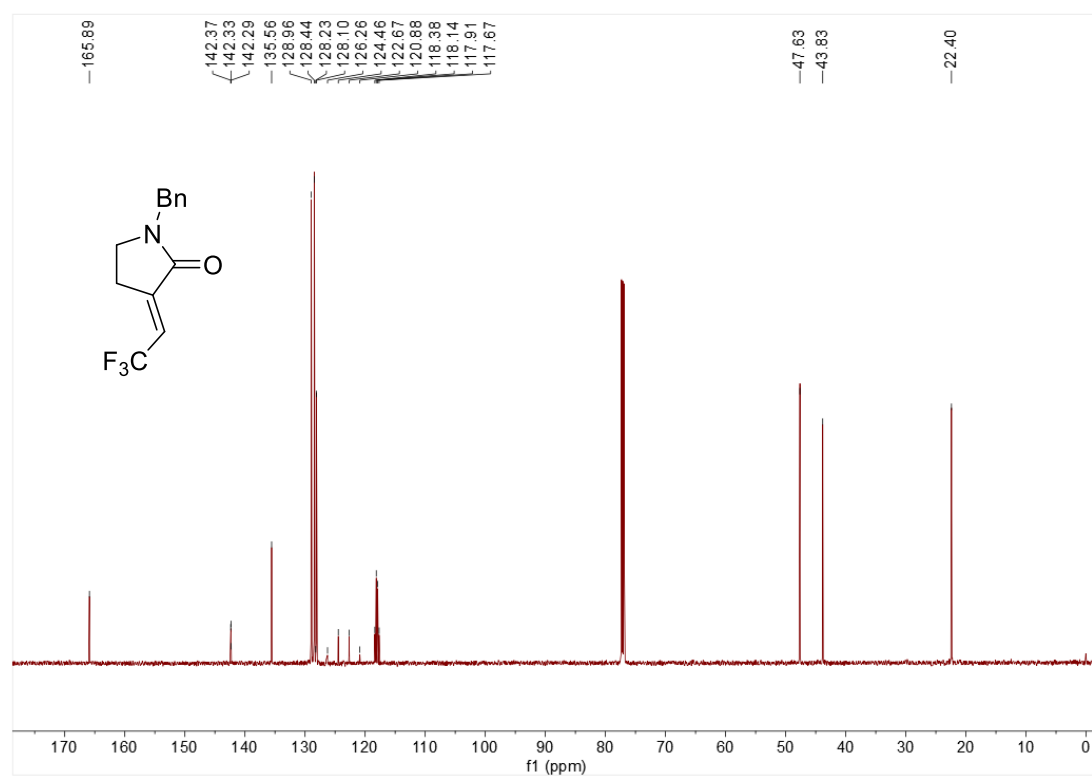

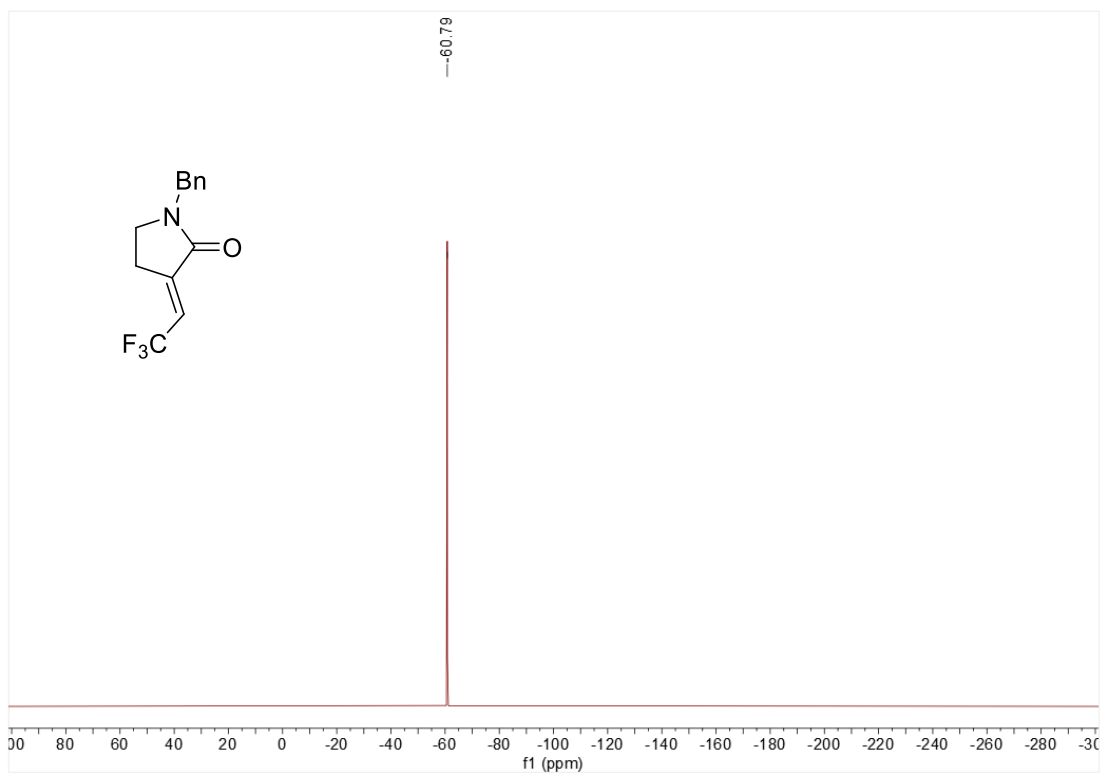

*tert*-butyl (*E*)-2-oxo-3-(2,2,2-trifluoroethylidene)pyrrolidine-1-carboxylate (**1s**)

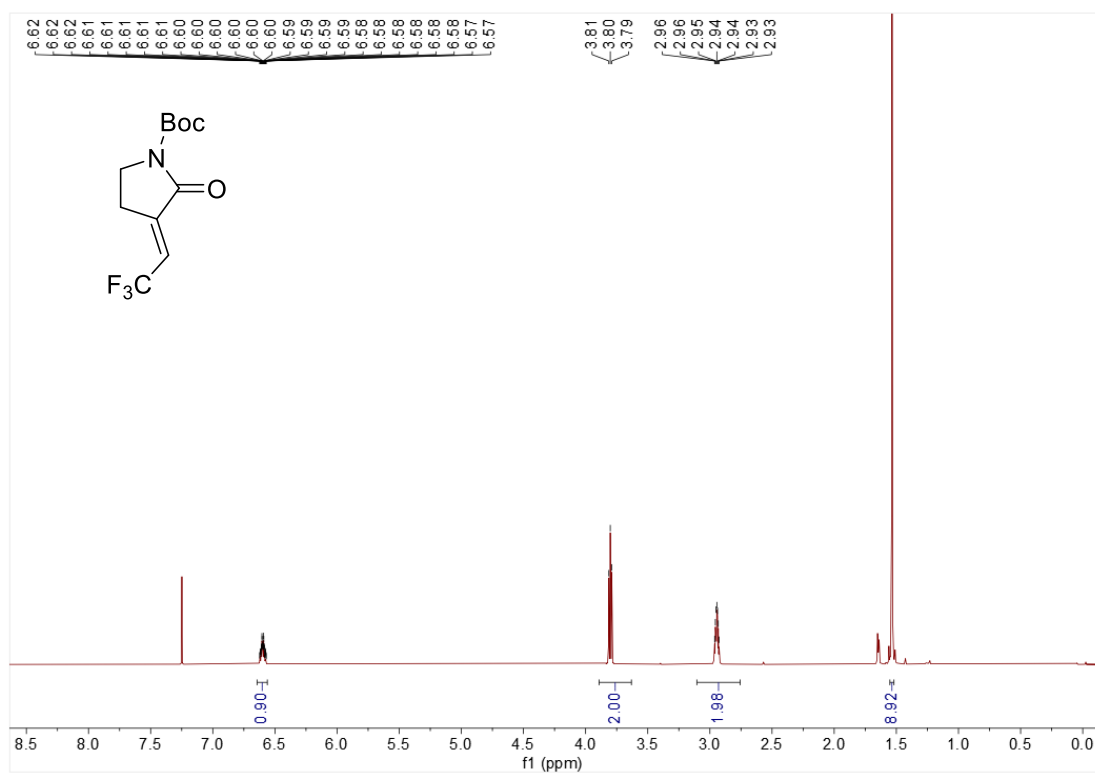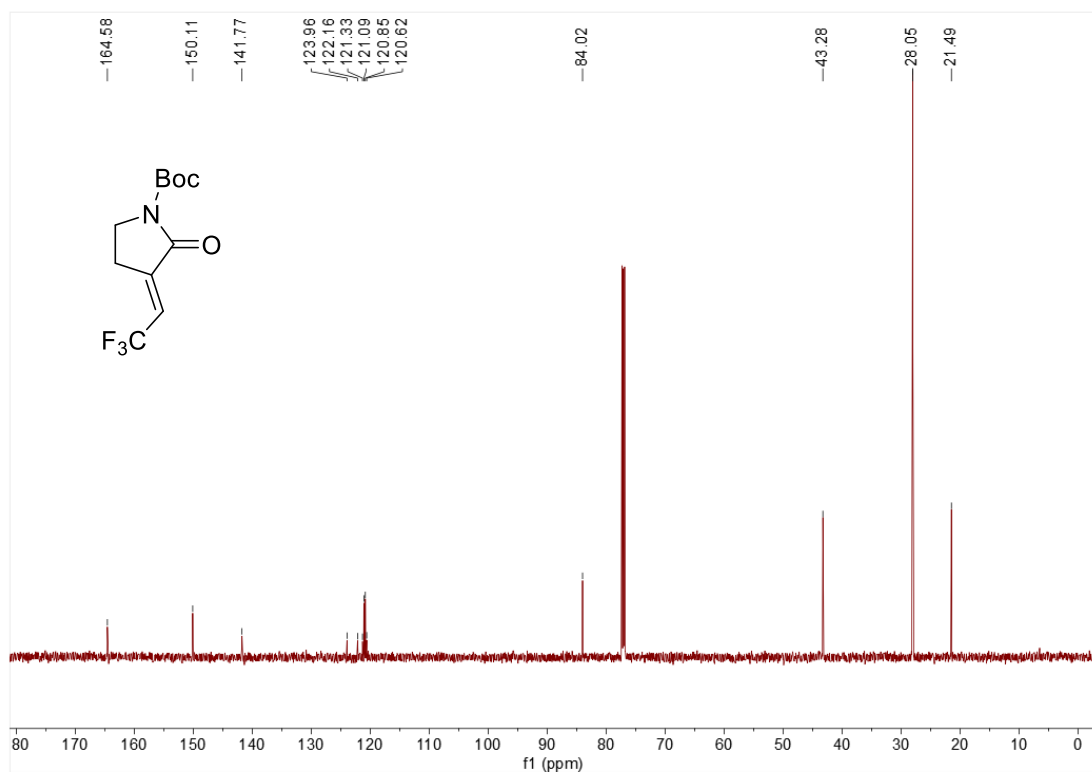

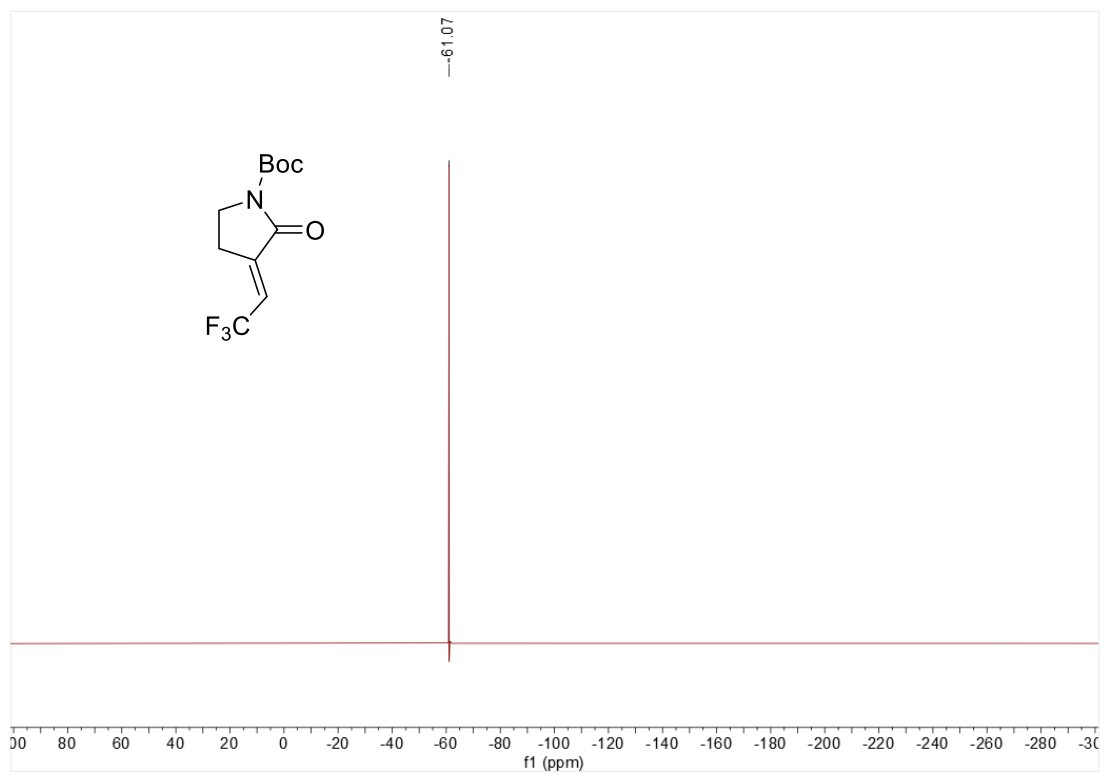

(*E*)-3-(2,2,2-trifluoroethylidene)pyrrolidin-2-one (**1t**)

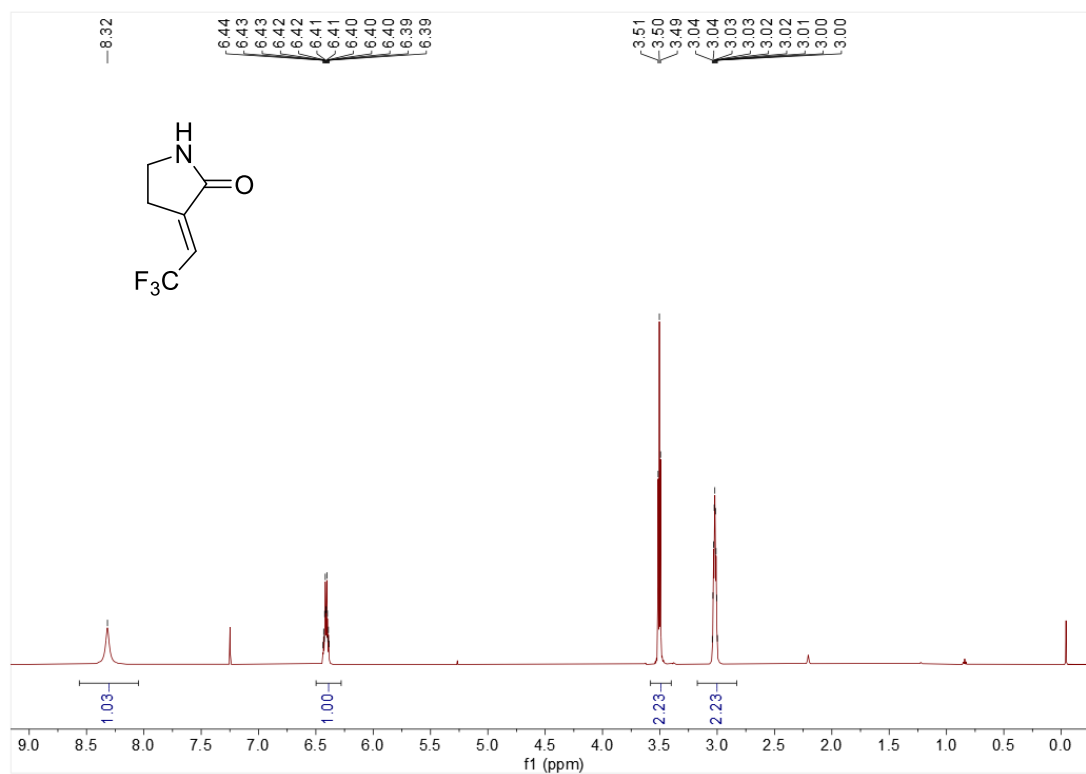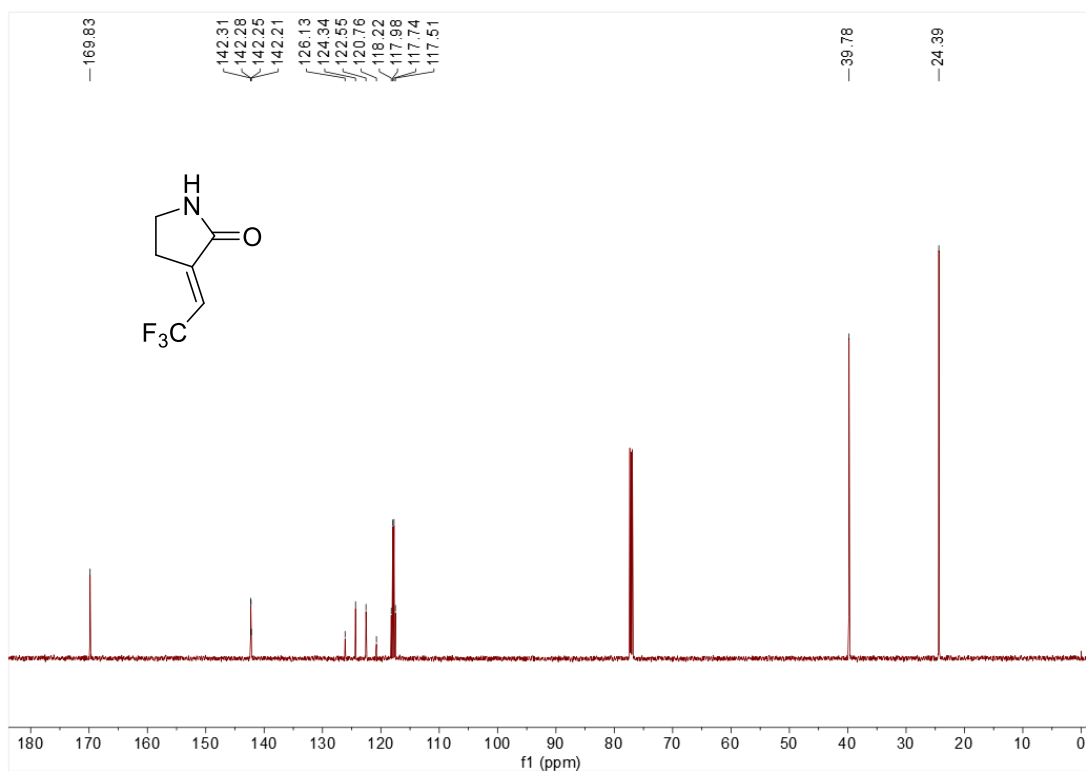

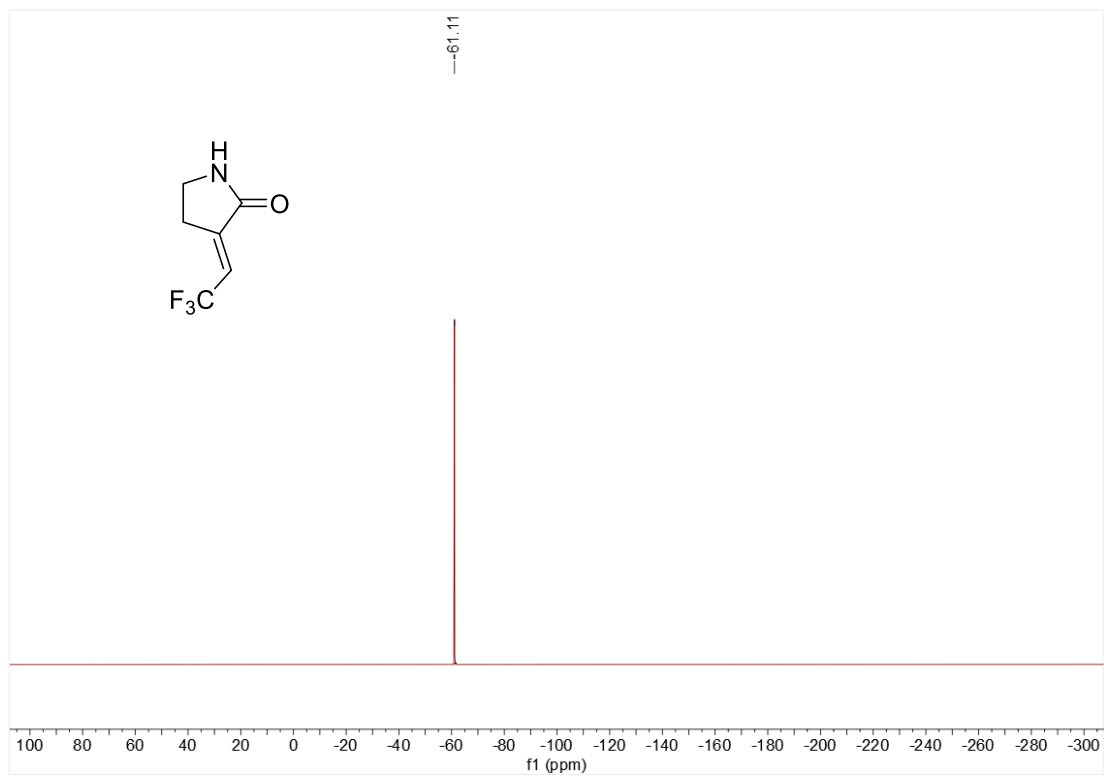



1-phenyl-3-(2,2,2-trifluoroethyl)-1,5-dihydro-2H-pyrrol-2-one (**1u**)

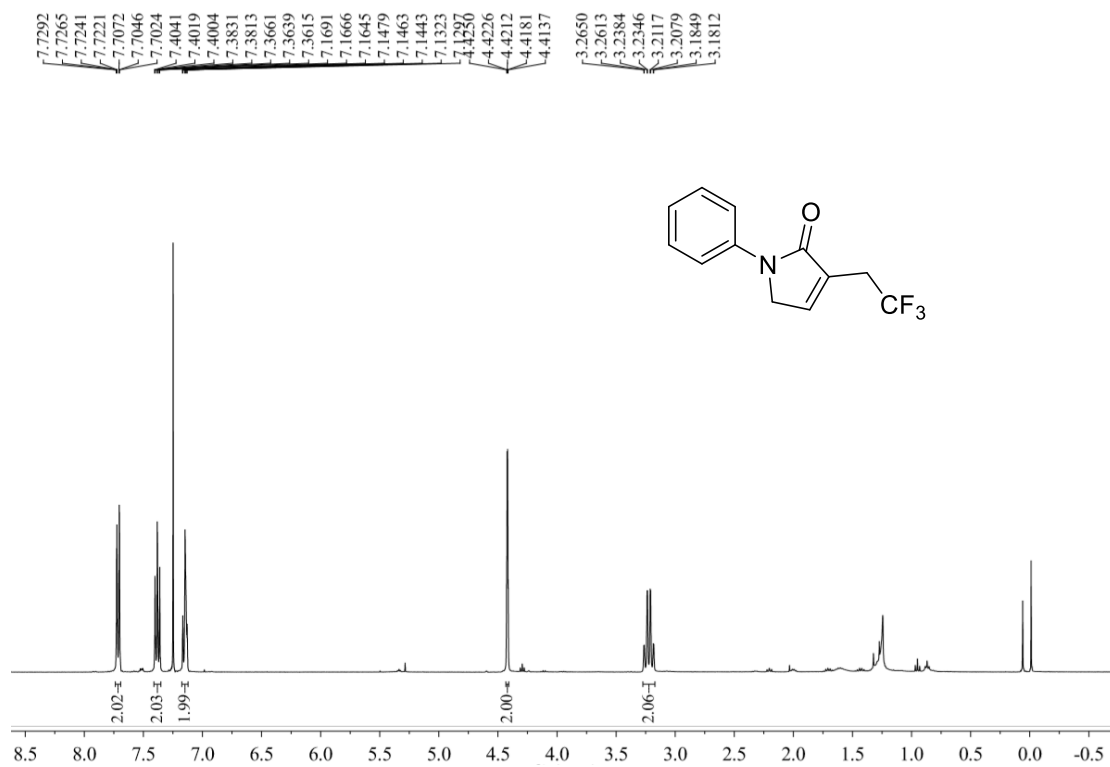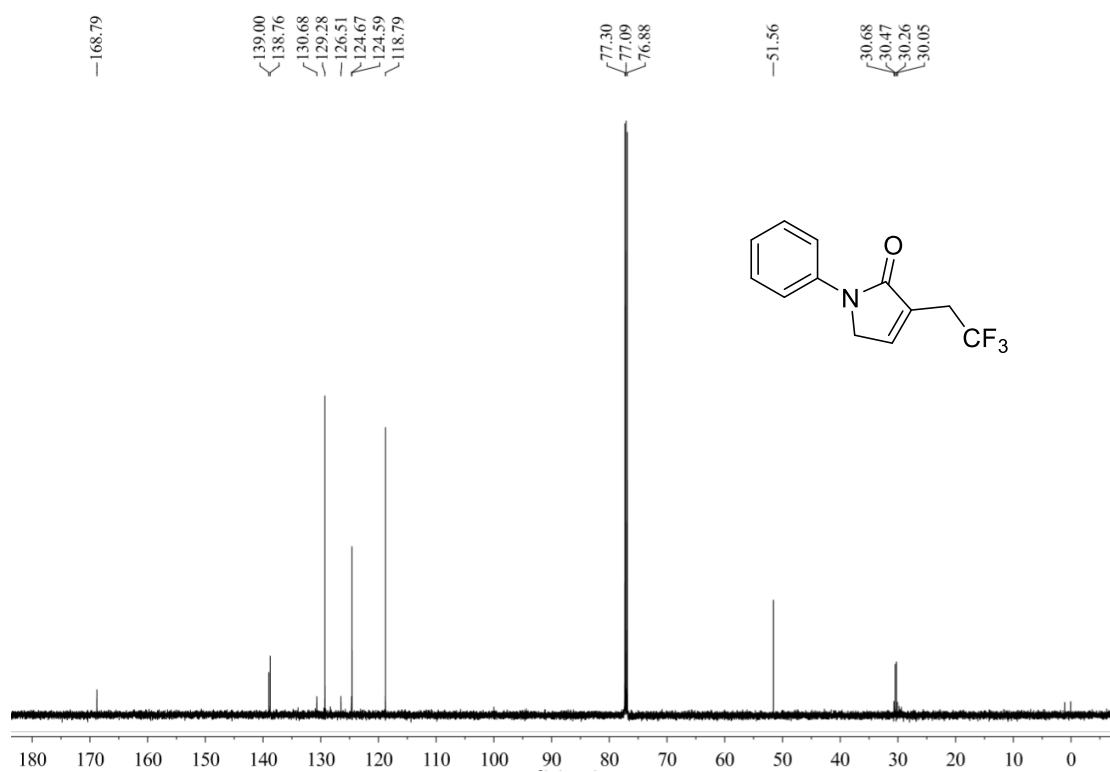

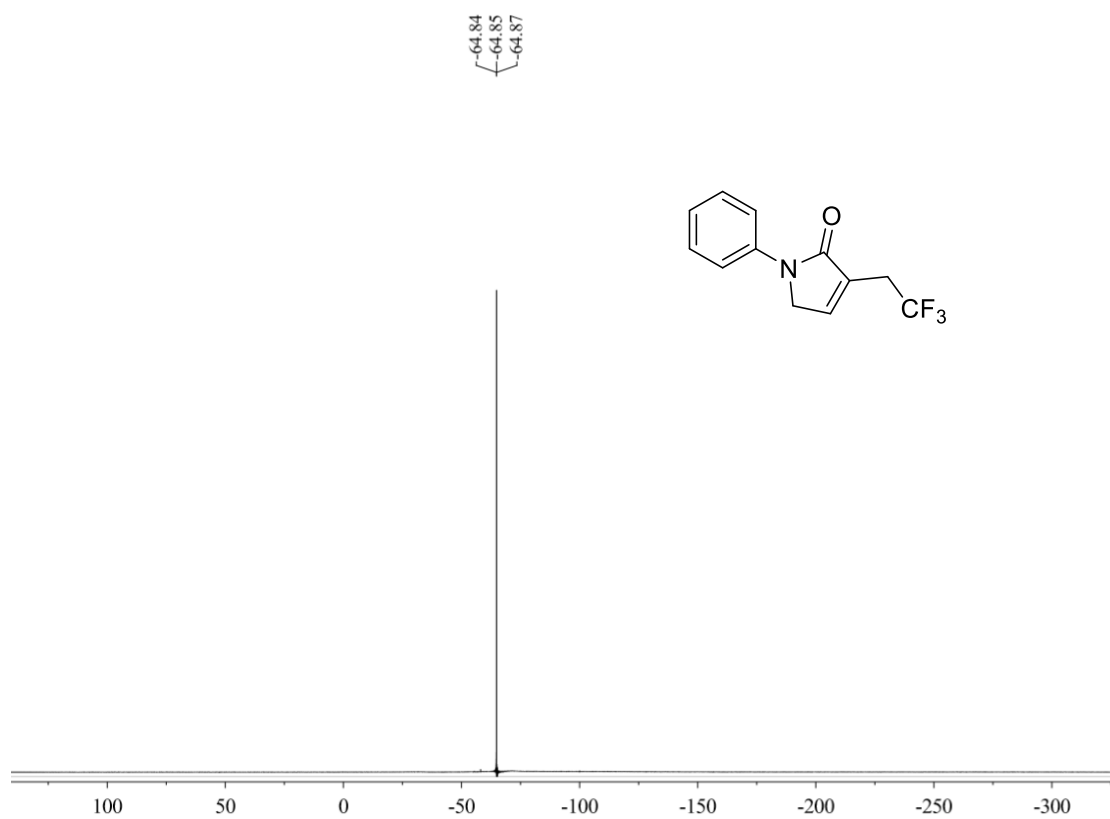

(E)-1-phenyl-3-(2,2,2-trifluoroethylidene)piperidin-2-one (**3a**)

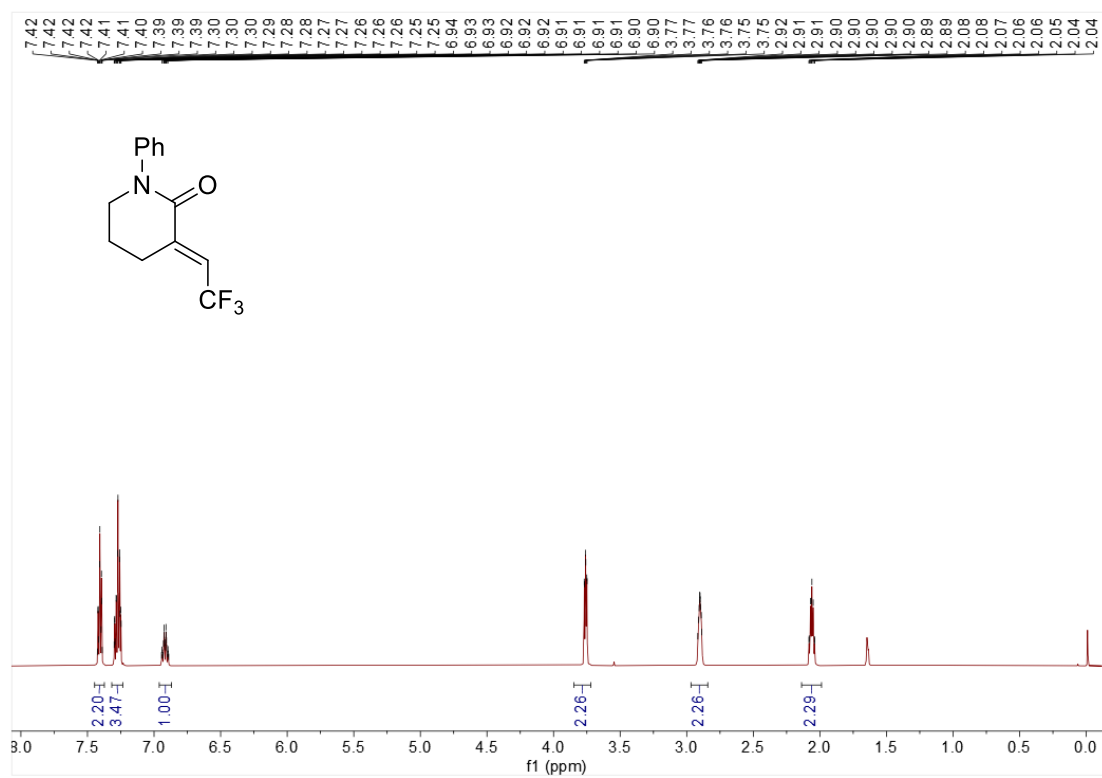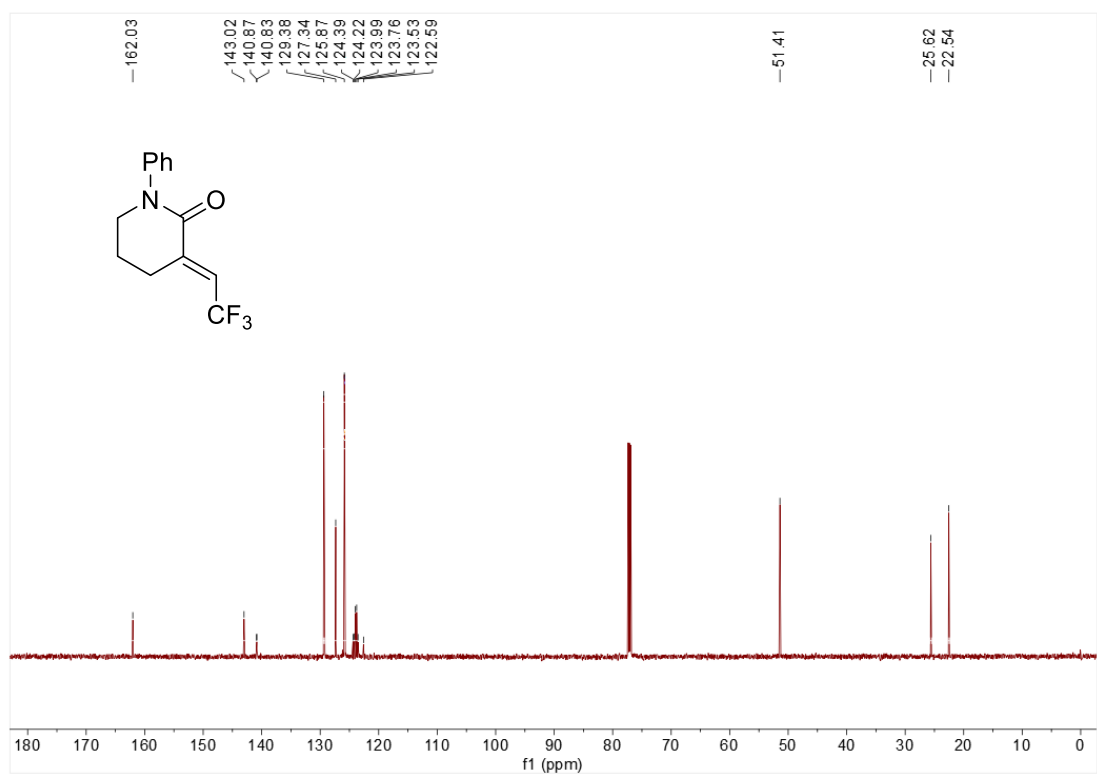

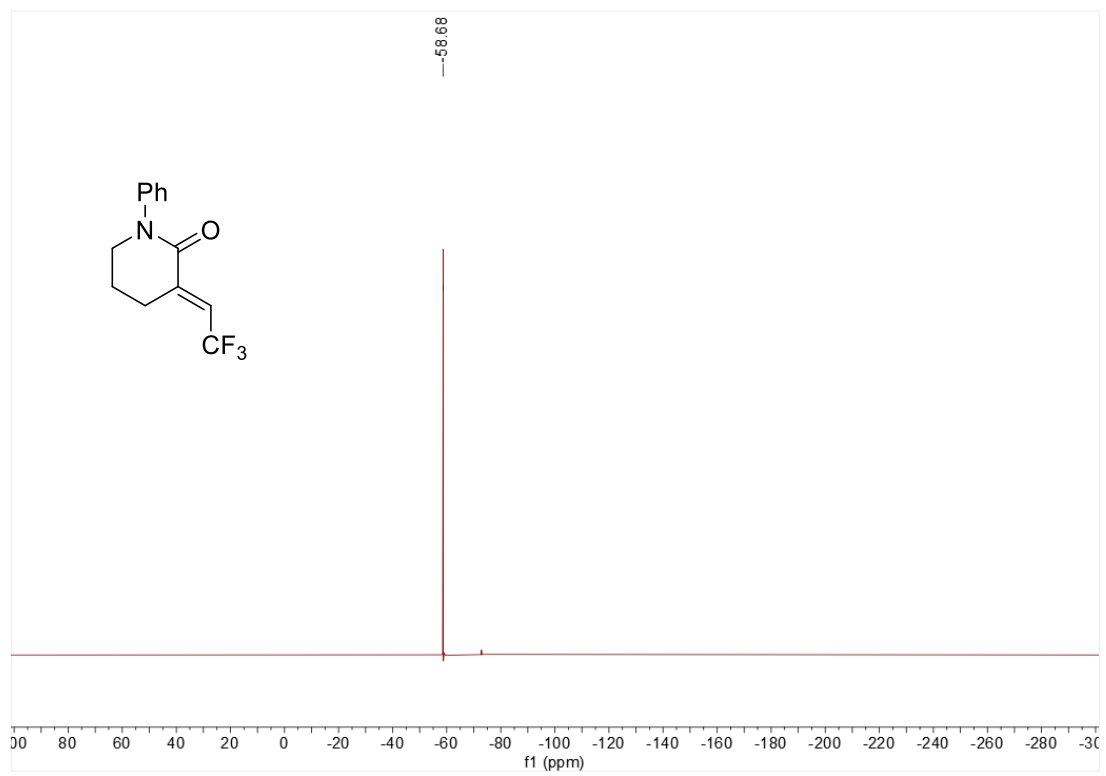

(E)-1-(*o*-tolyl)-3-(2,2,2-trifluoroethylidene)piperidin-2-one (**3b**)

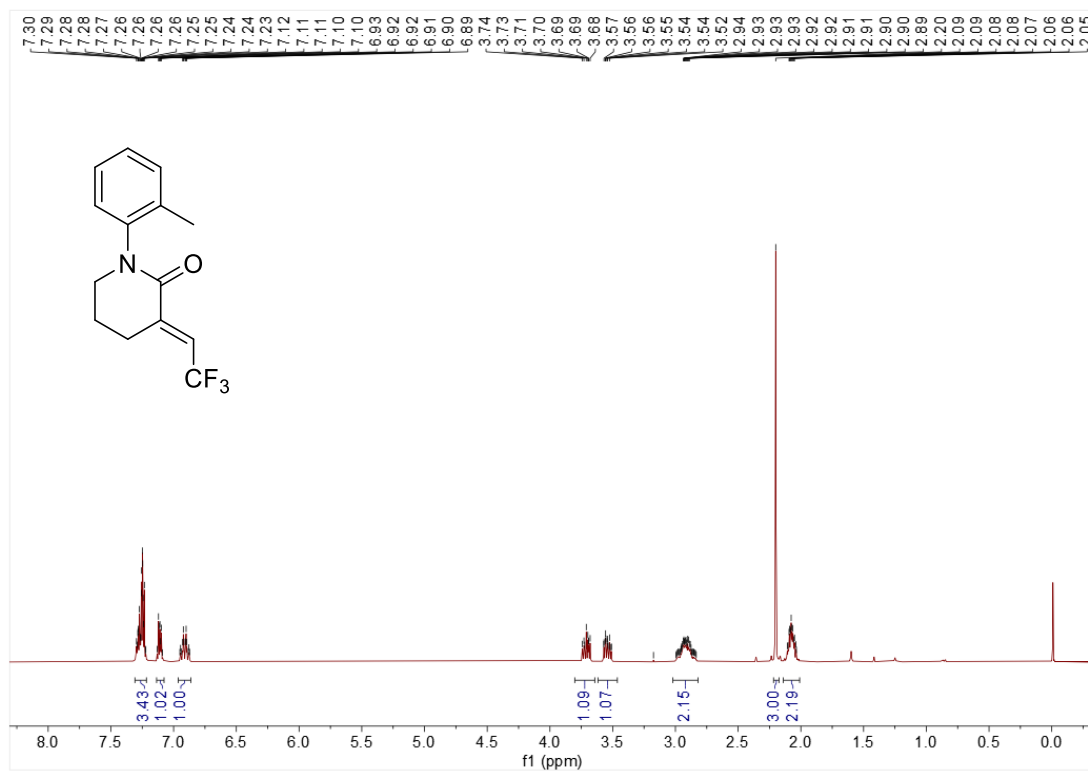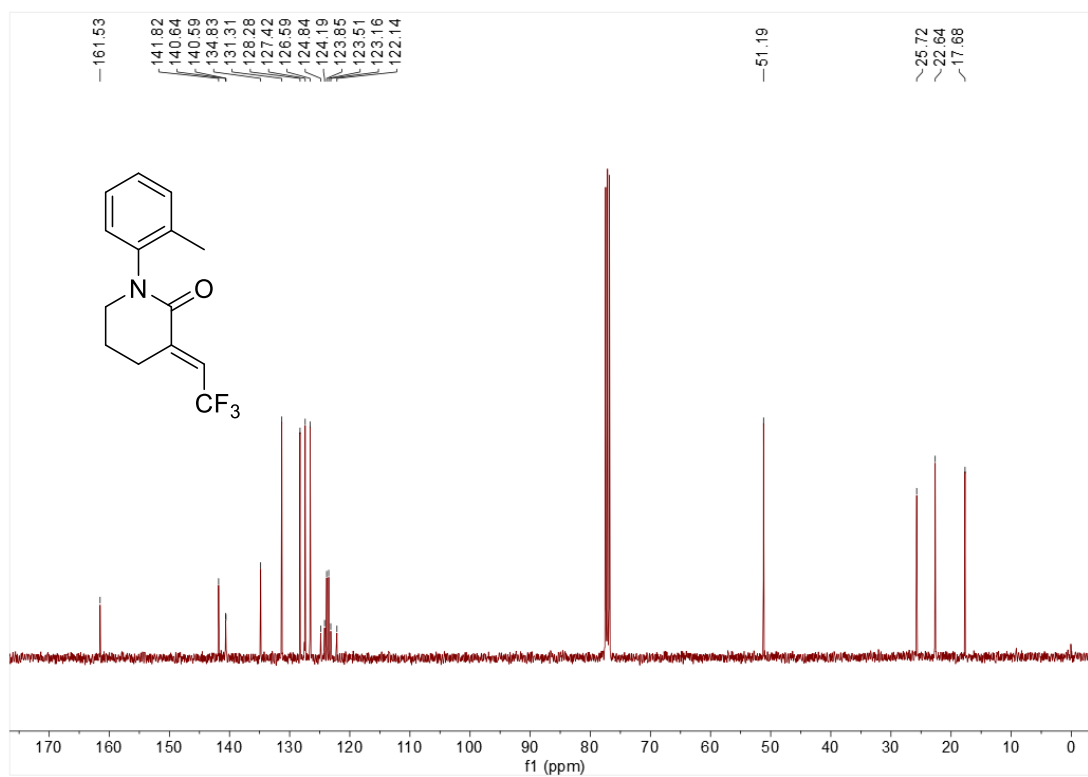

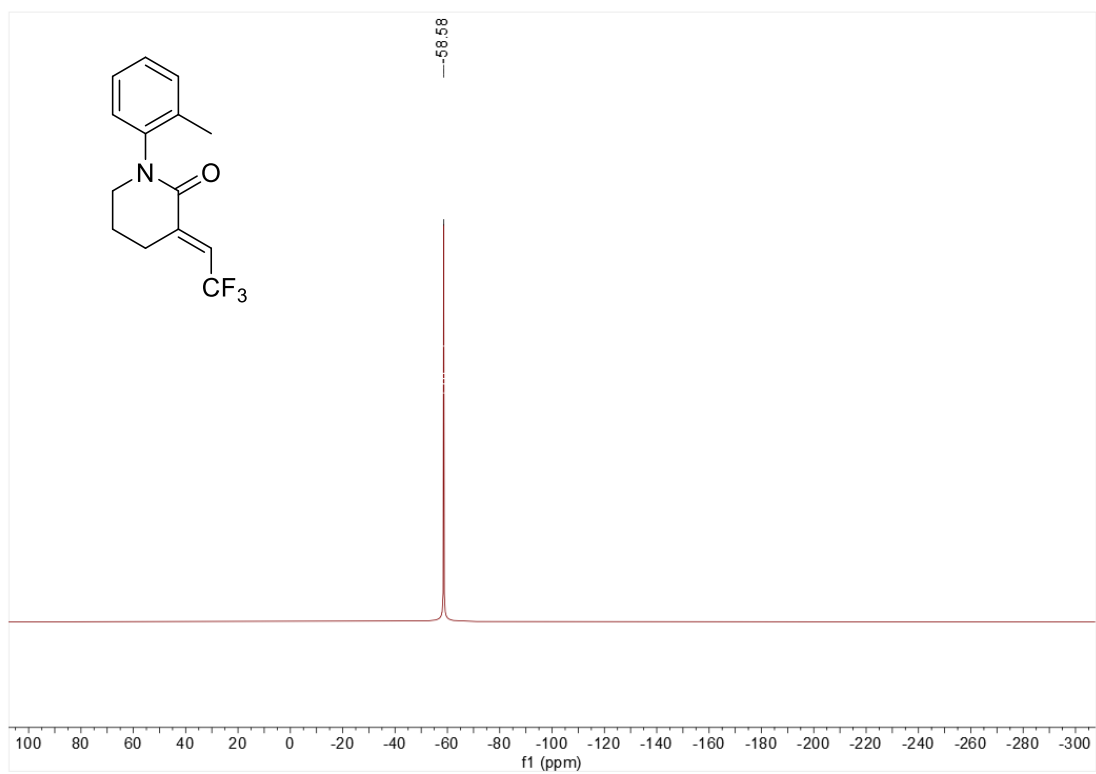

(E)-1-(*m*-tolyl)-3-(2,2,2-trifluoroethylidene)piperidin-2-one (**3c**)

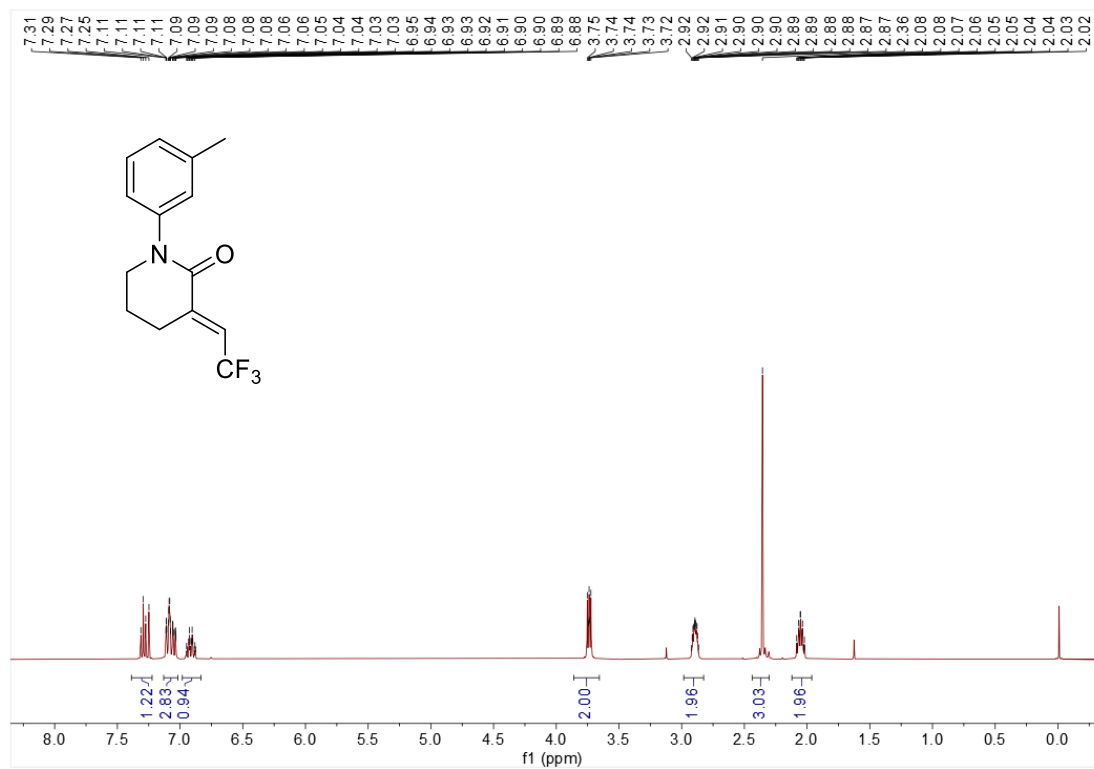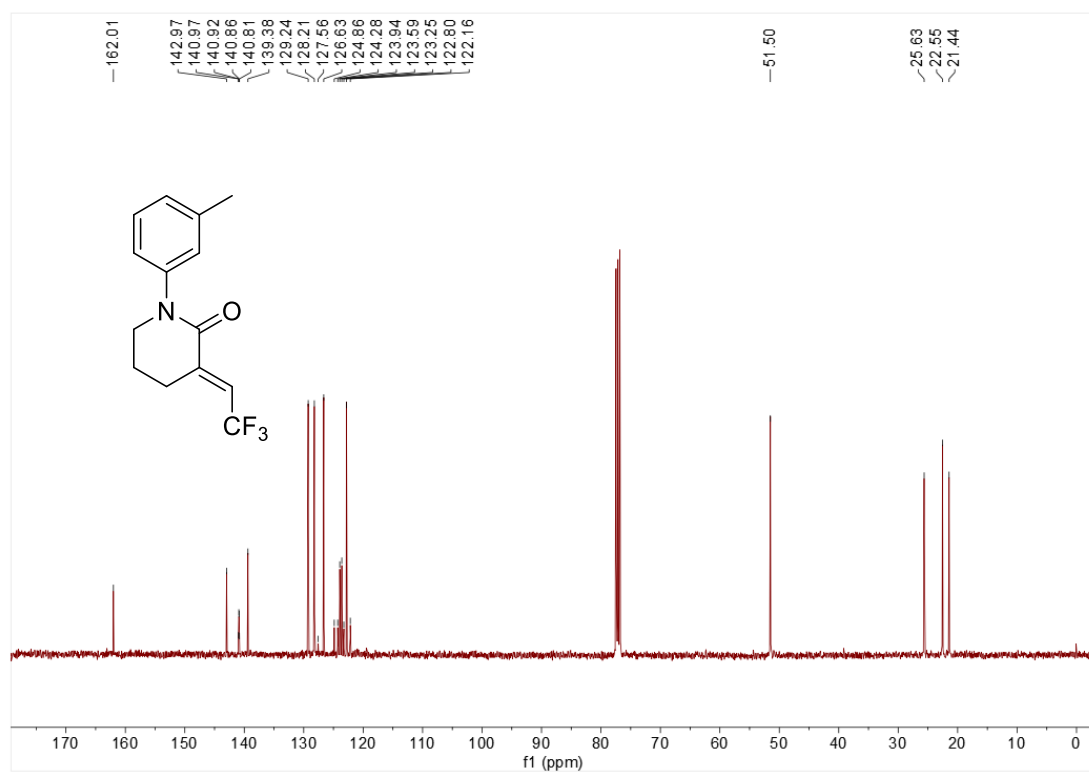

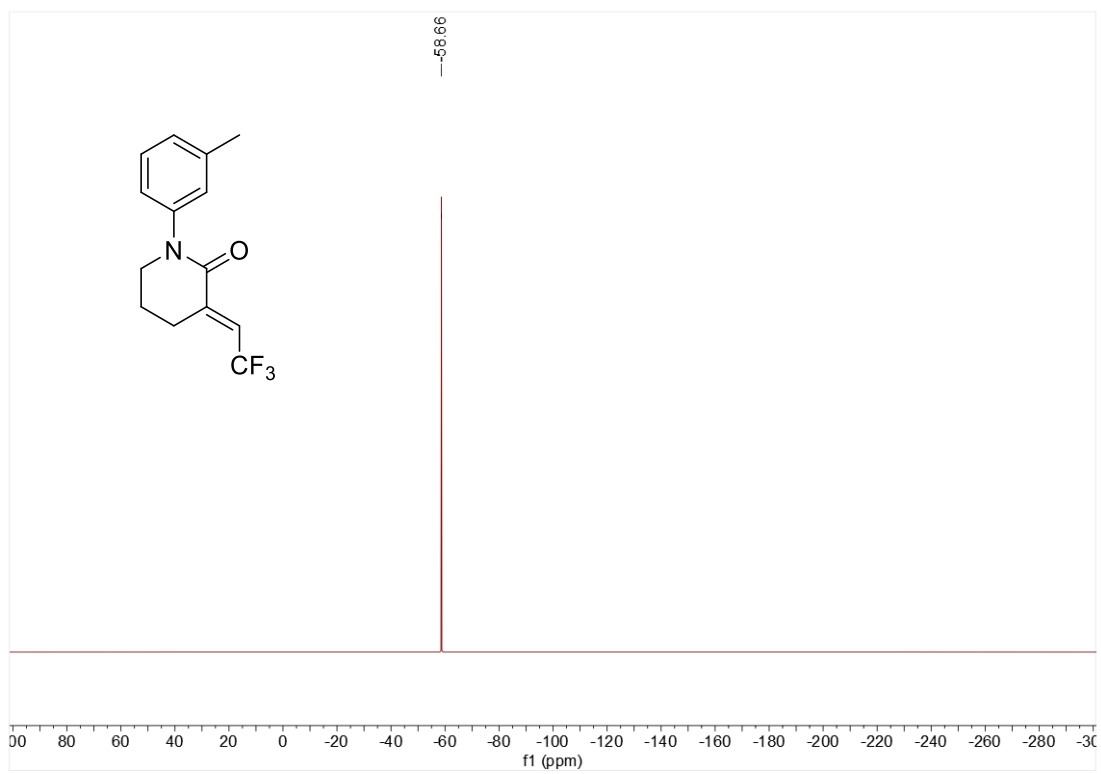



(E)-1-(4-methoxyphenyl)-3-(2,2,2-trifluoroethylidene)piperidin-2-one (**3d**)

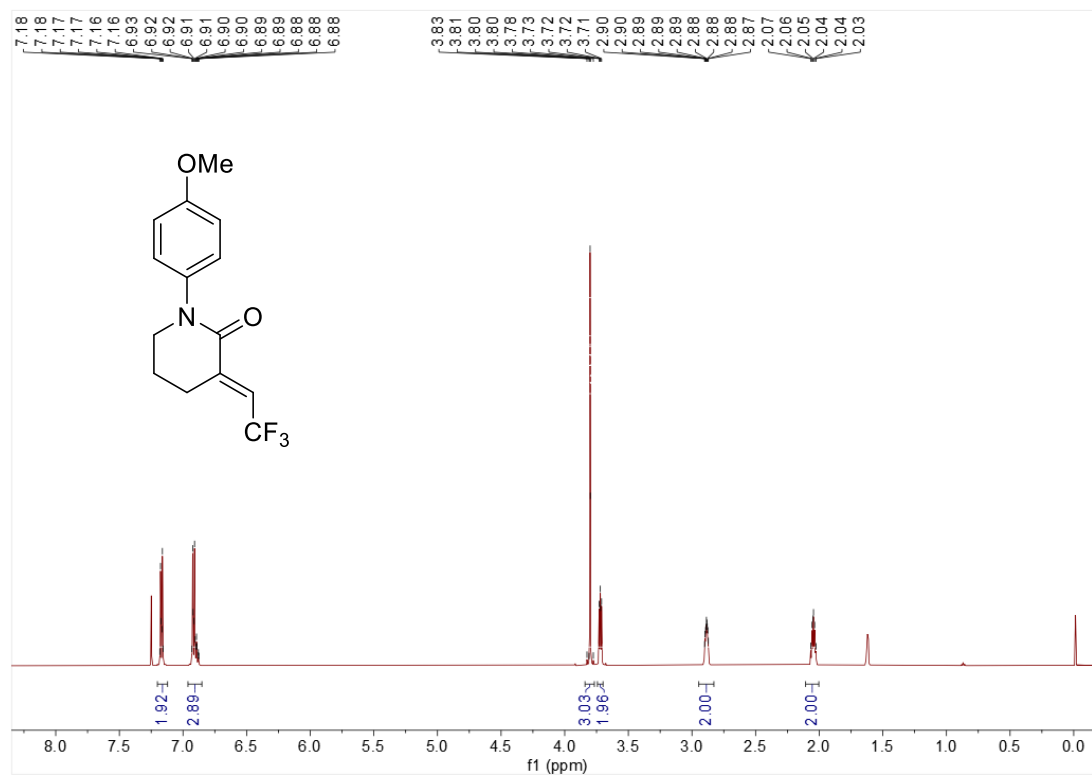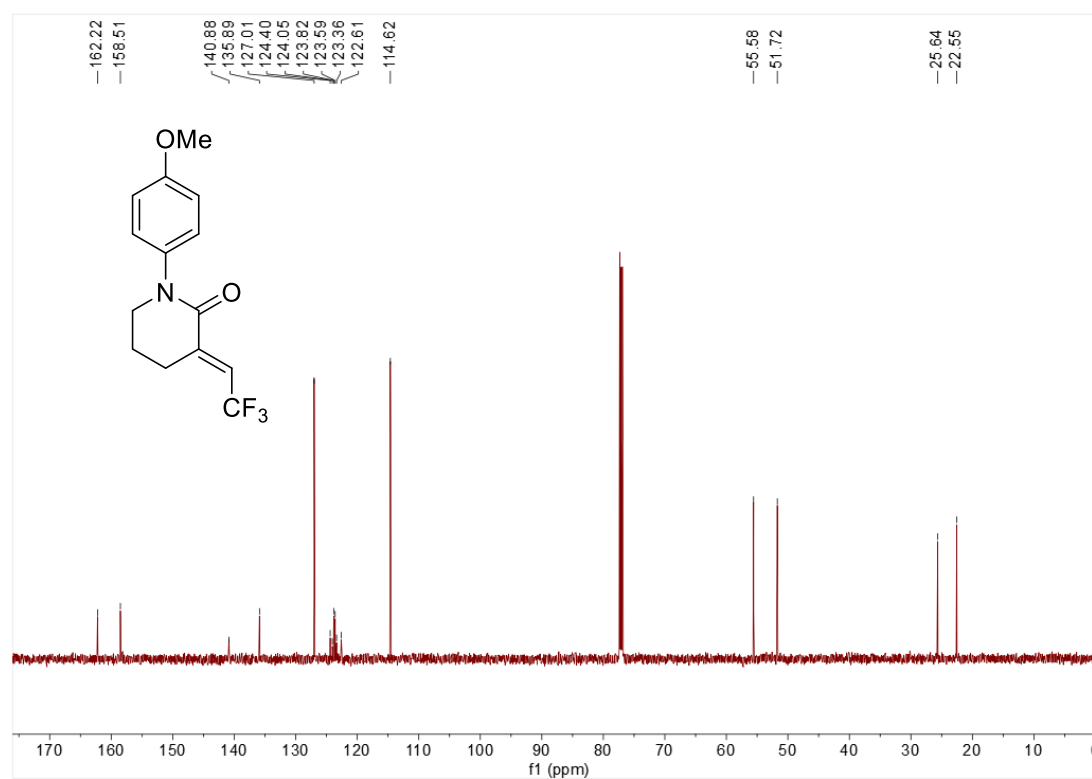

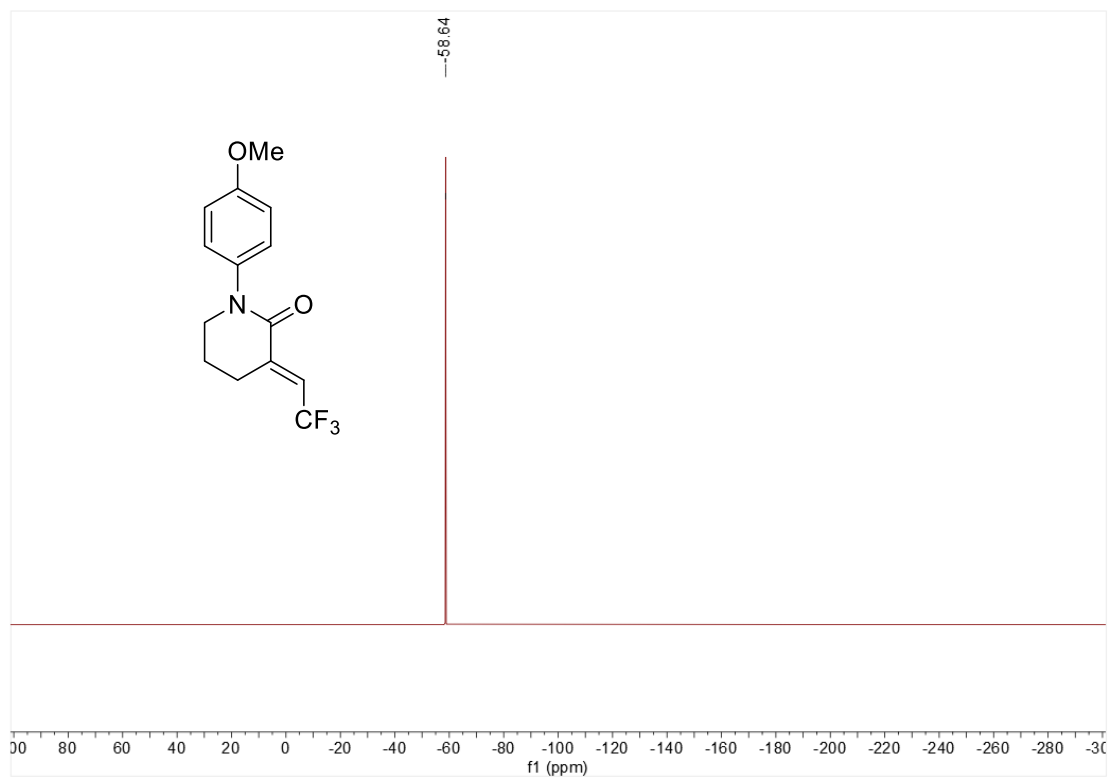

(E)-1-(4-(*tert*-butyl)phenyl)-3-(2,2,2-trifluoroethylidene)piperidin-2-one (**3e**)

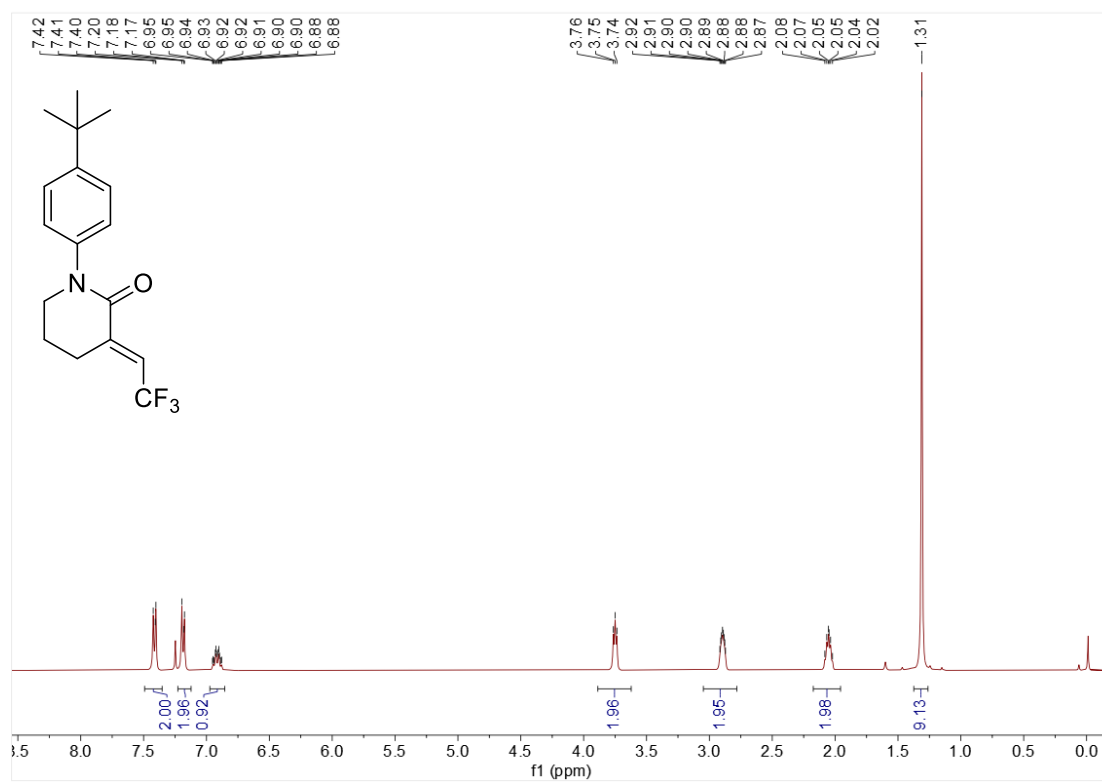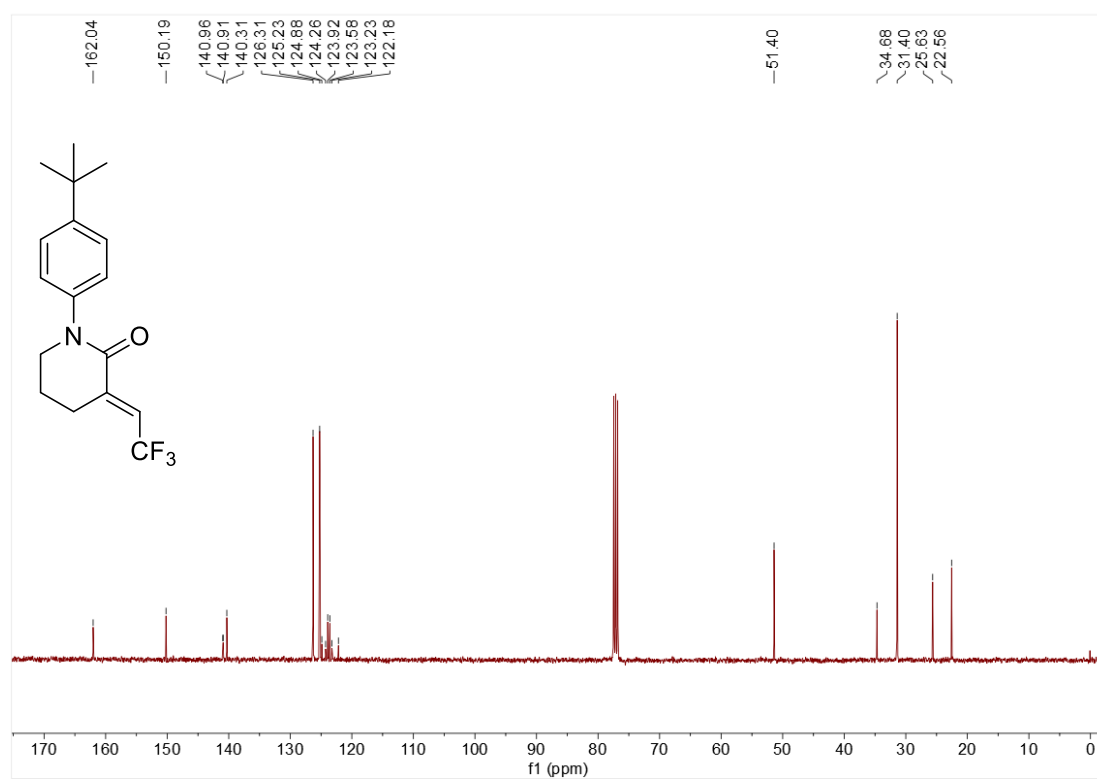

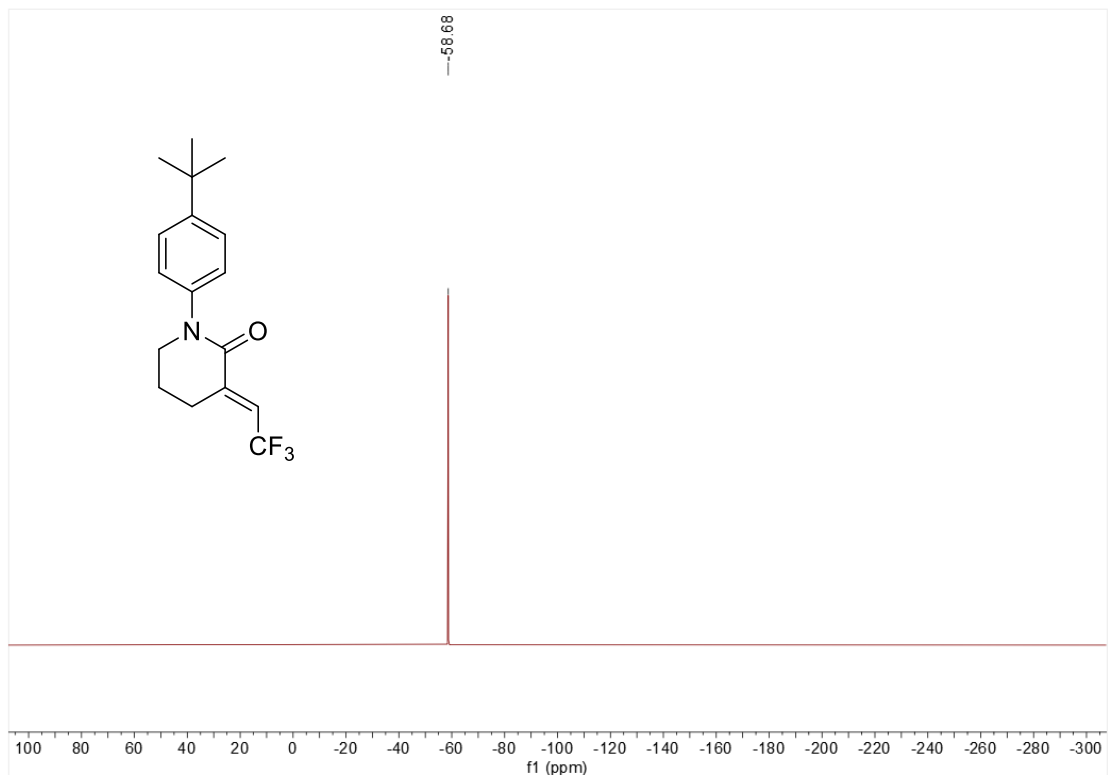

(*E*)-1-(2-chlorophenyl)-3-(2,2,2-trifluoroethylidene)piperidin-2-one (**3f**)

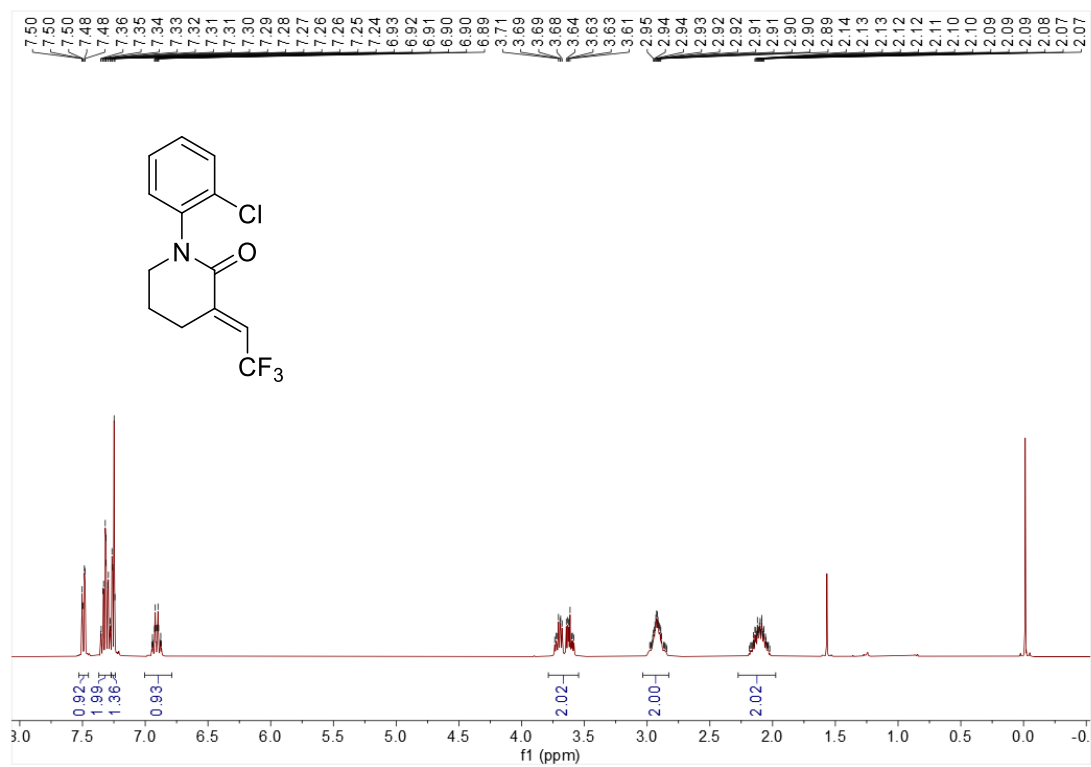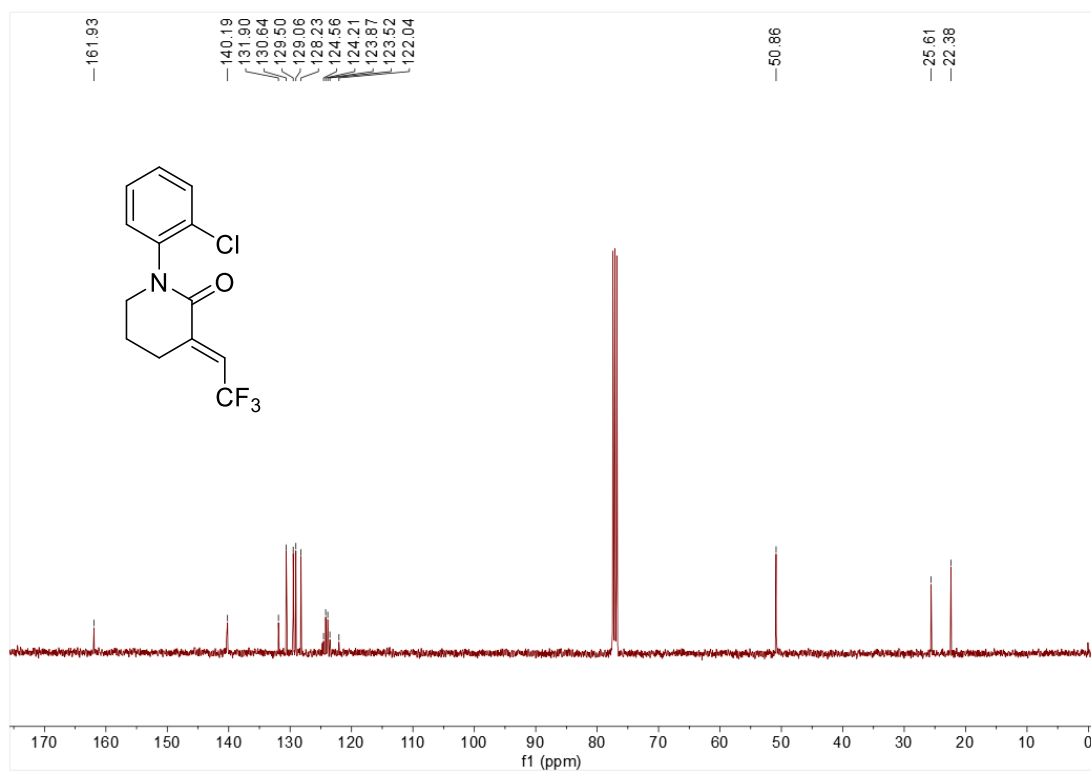

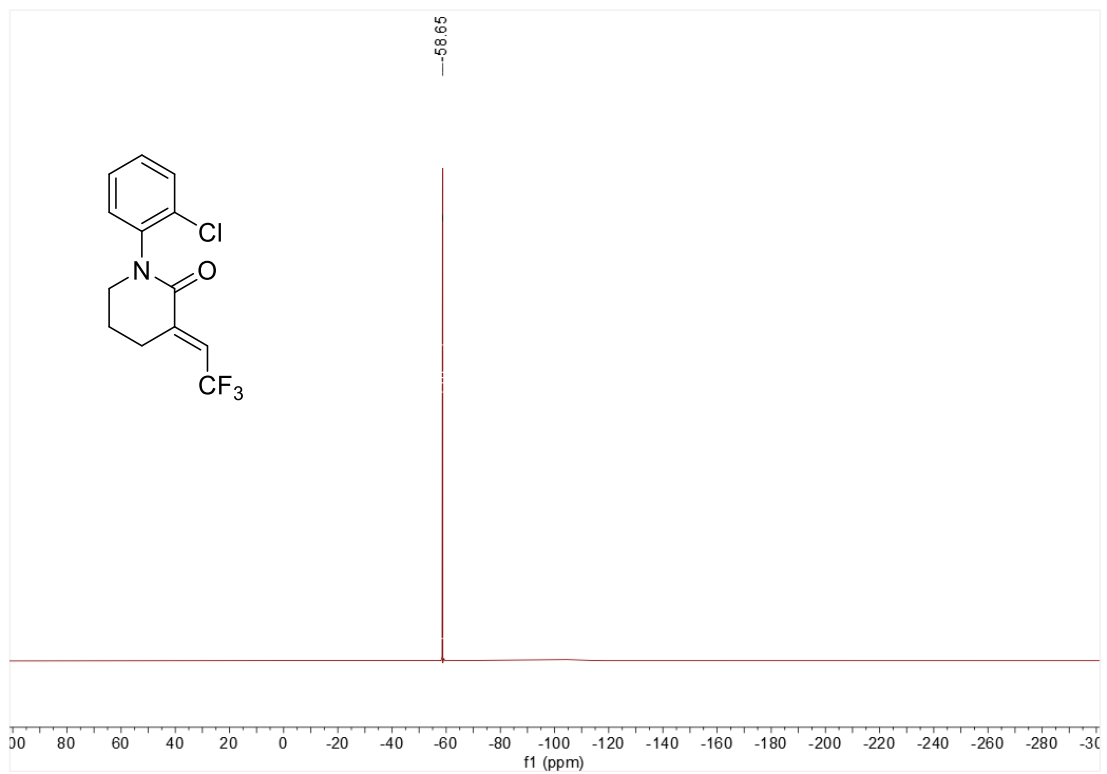

(*E*)-1-(3-fluorophenyl)-3-(2,2,2-trifluoroethylidene)piperidin-2-one (**3g**)

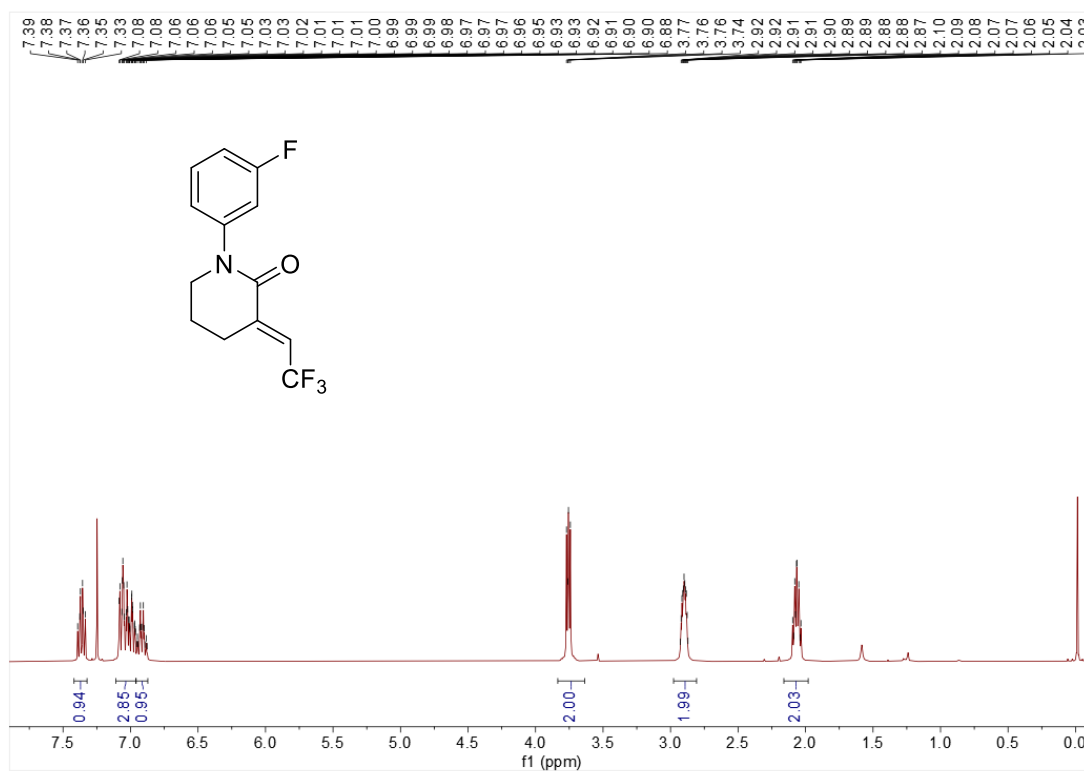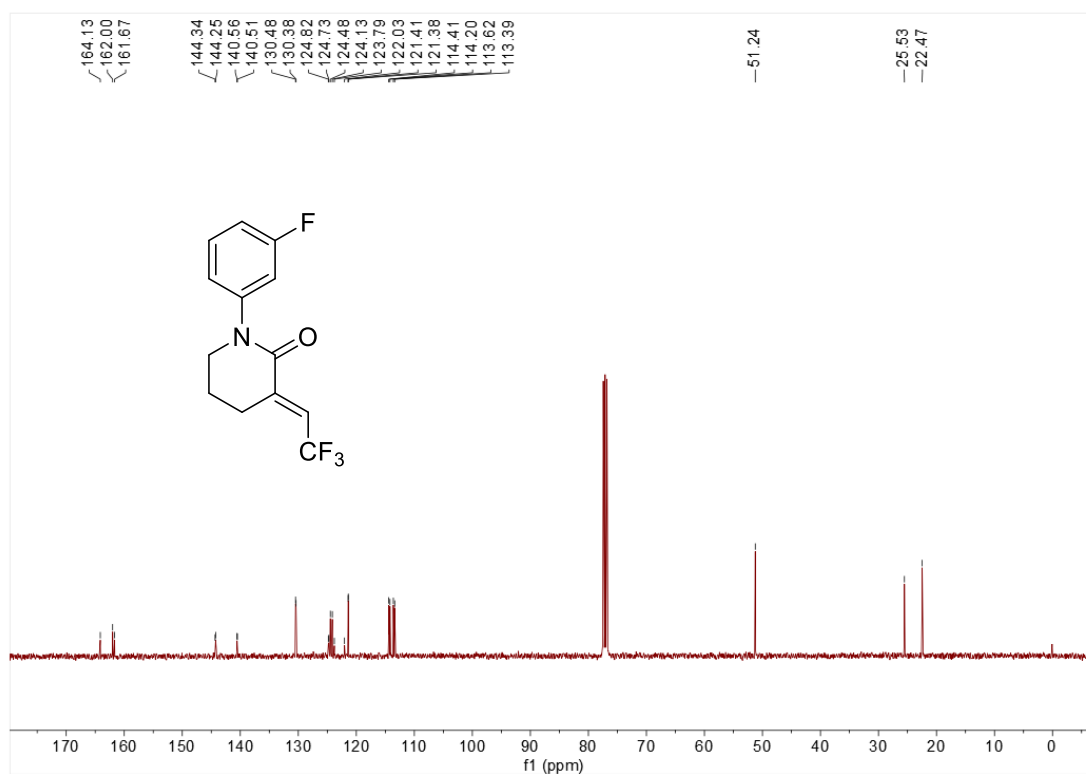

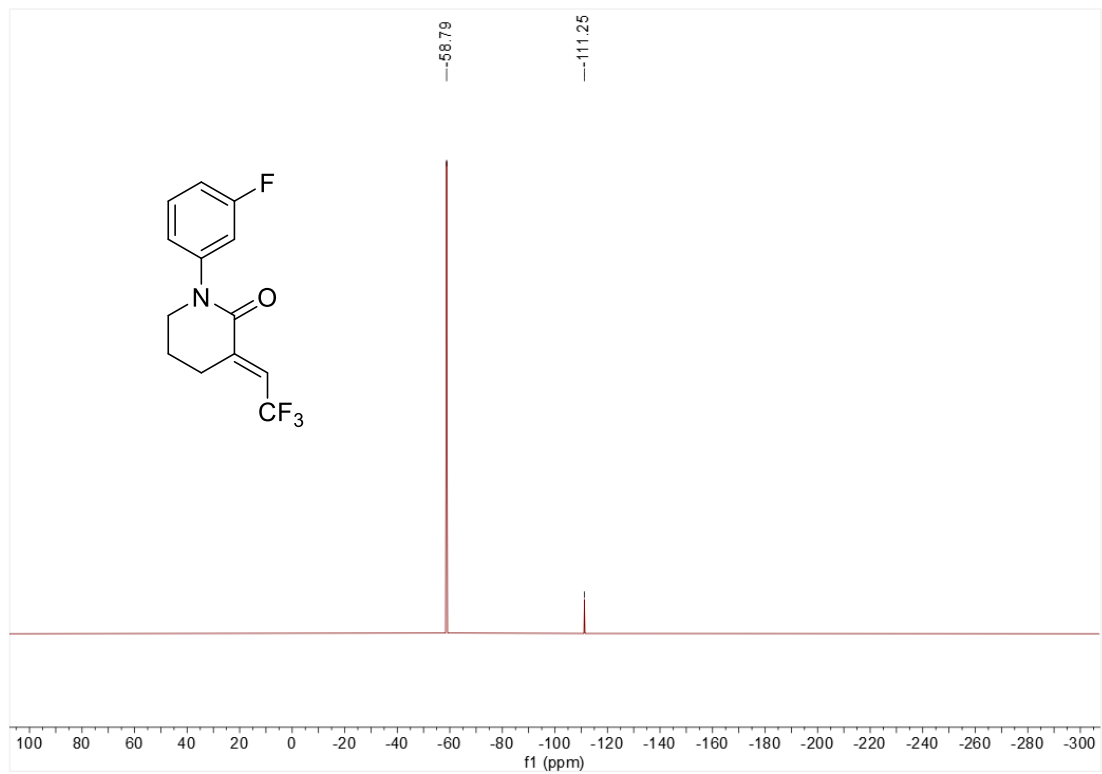



(E)-1-(3-bromophenyl)-3-(2,2,2-trifluoroethylidene)piperidin-2-one (**3h**)

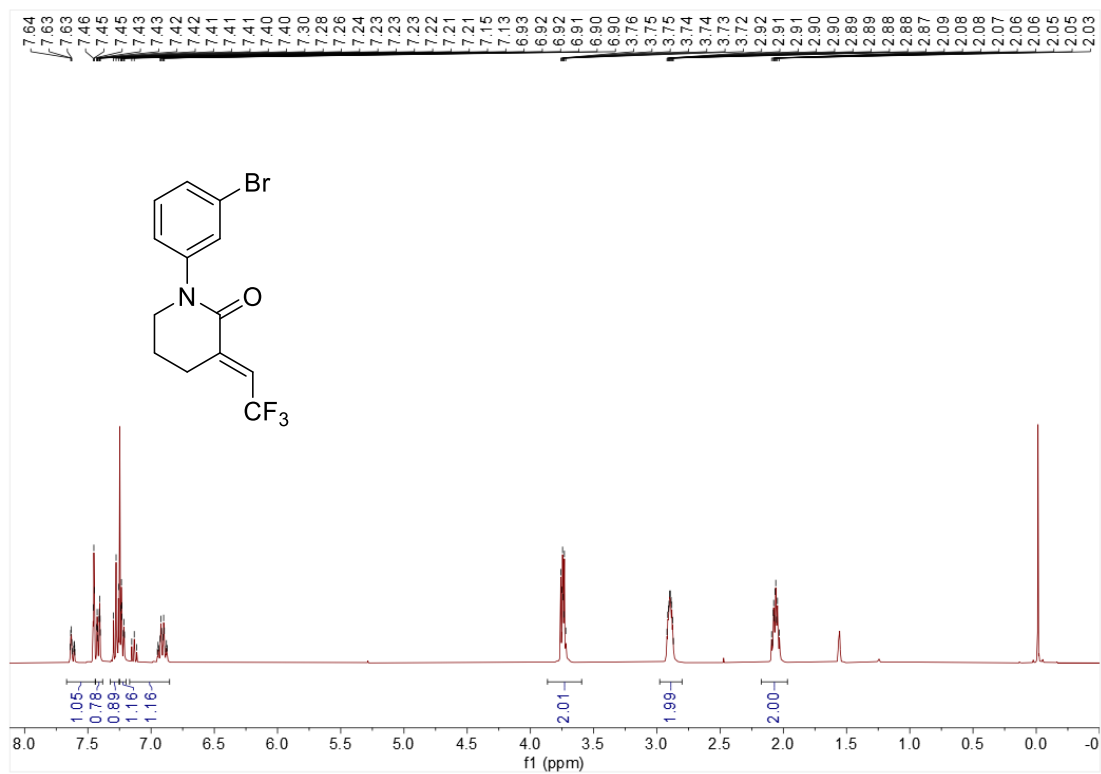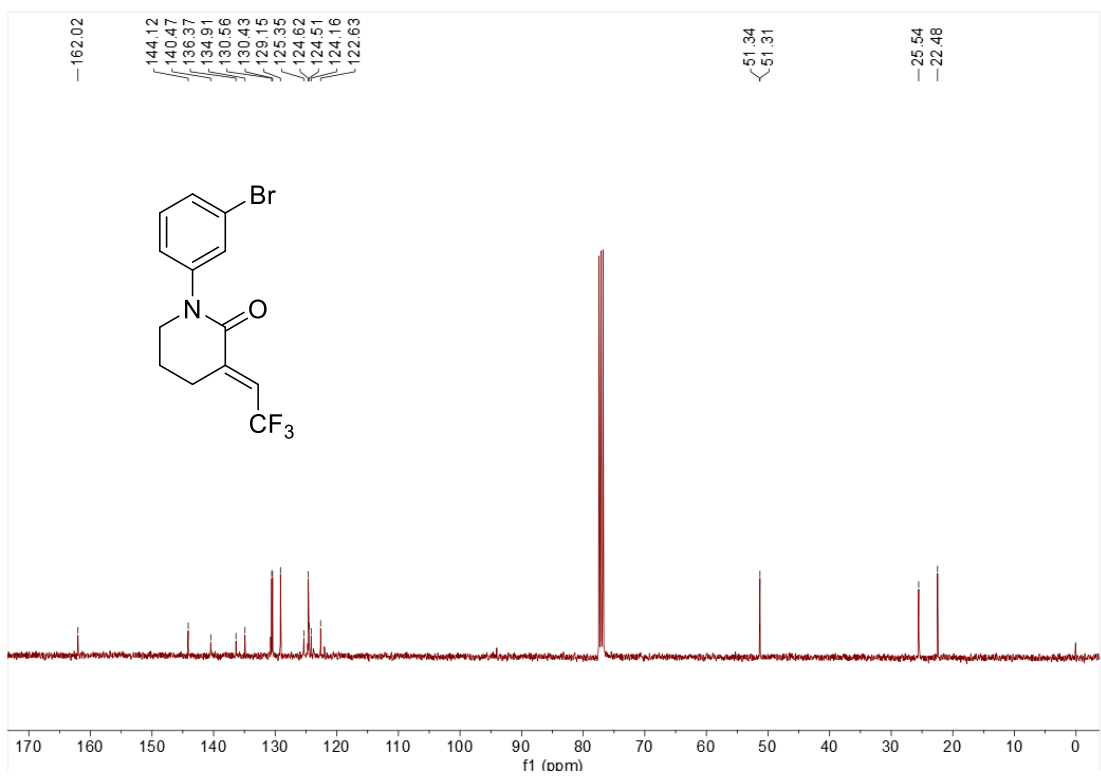

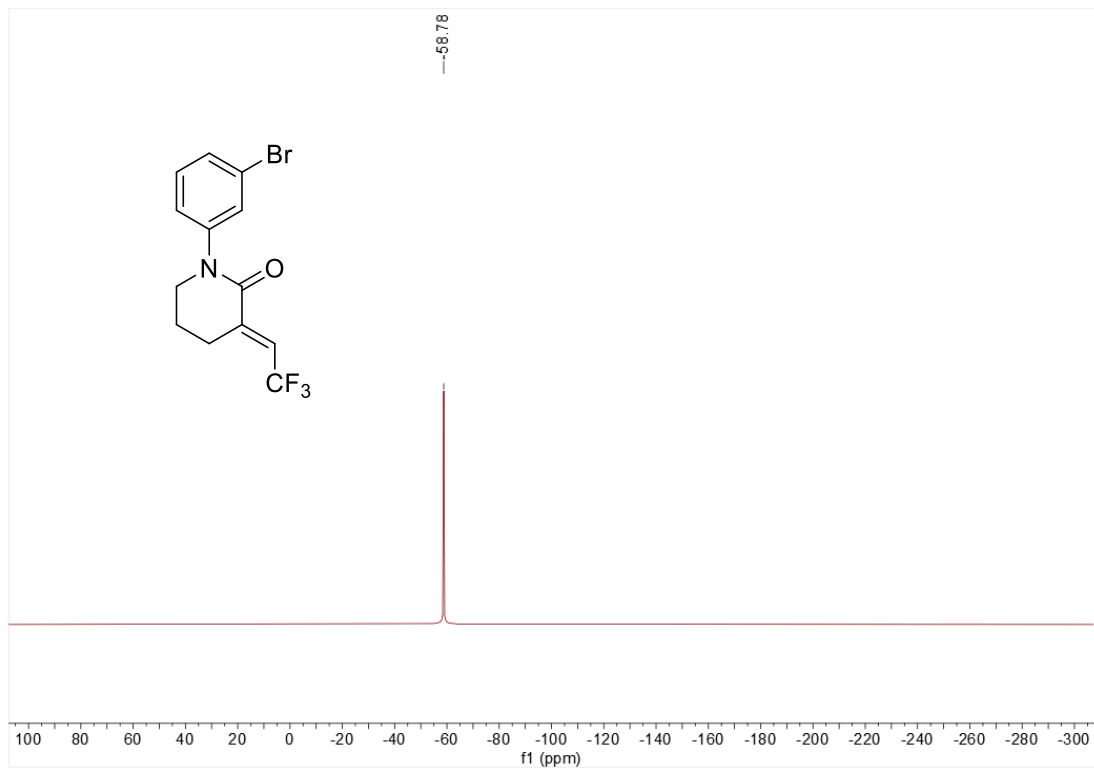

(E)-1-(4-bromophenyl)-3-(2,2,2-trifluoroethylidene)piperidin-2-one (**3i**)

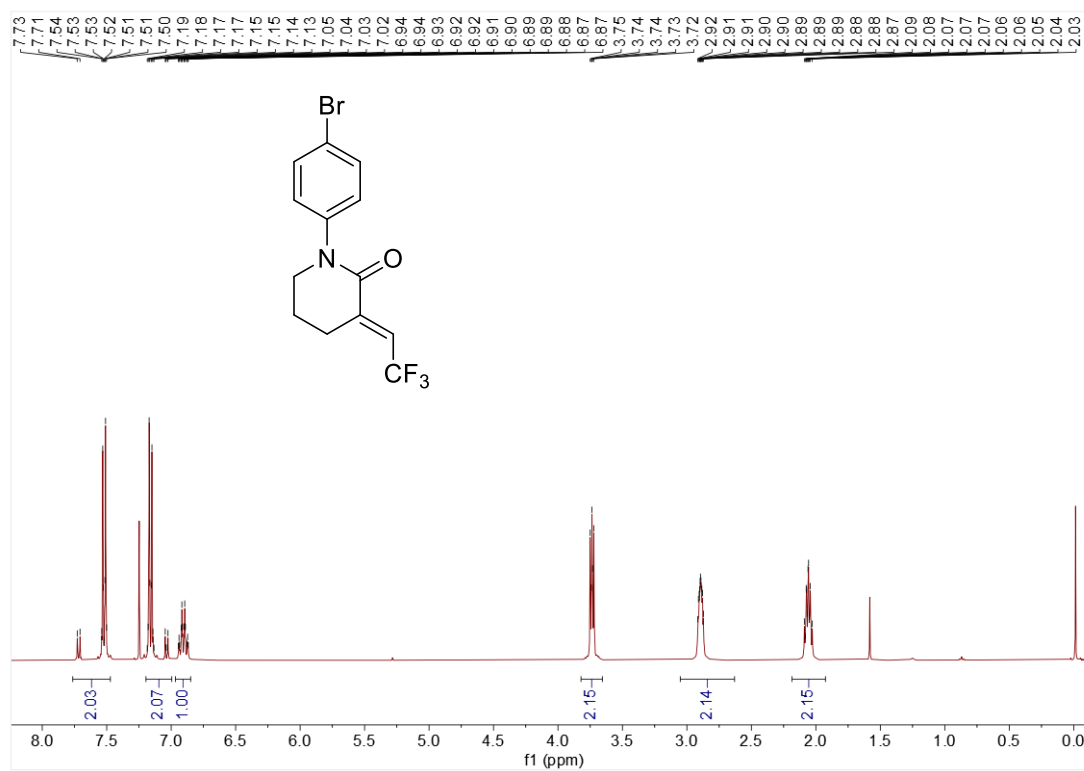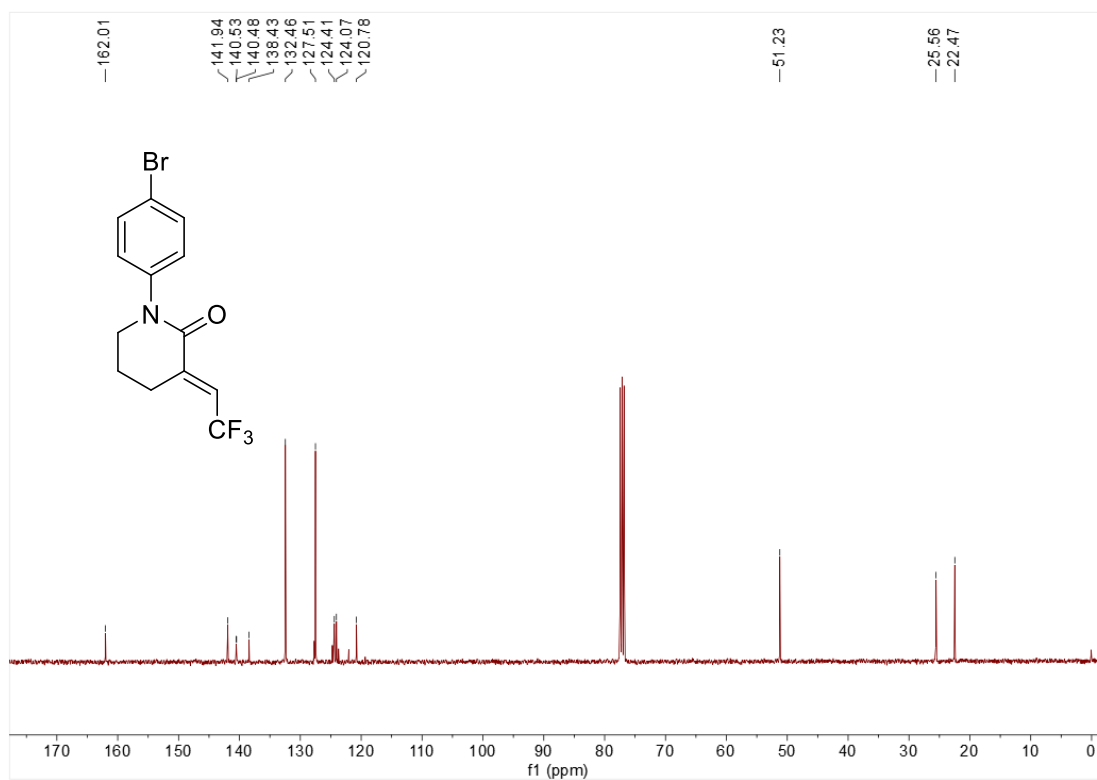

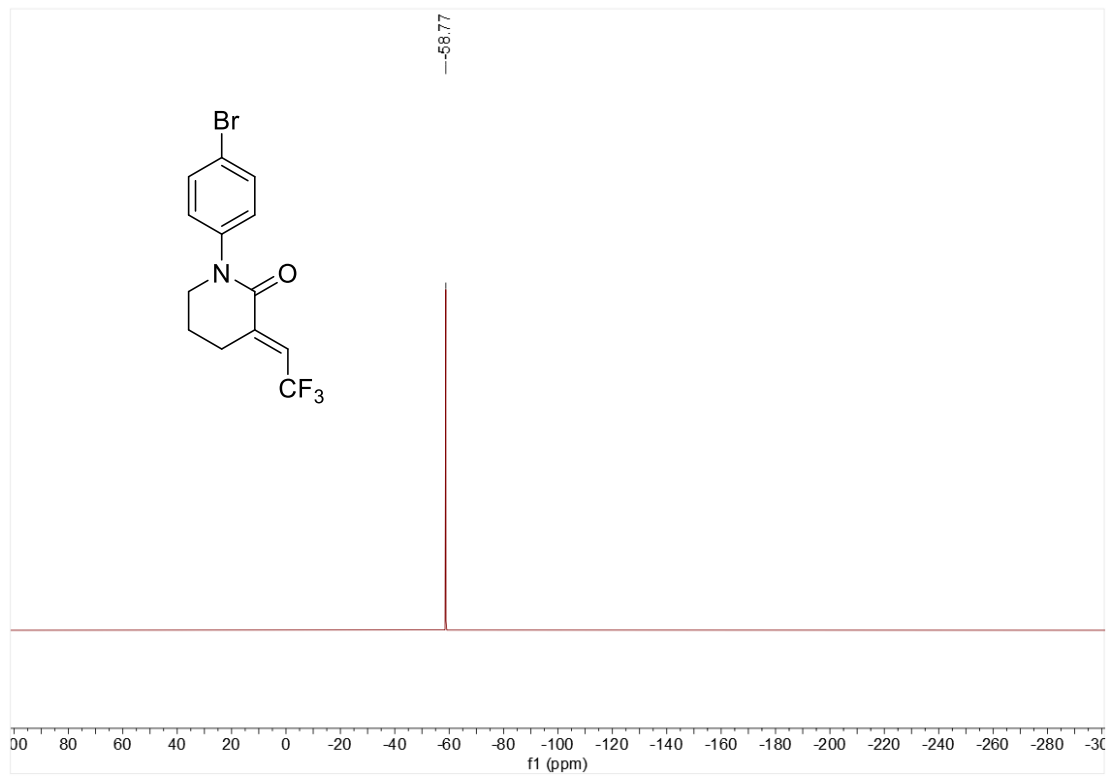

(E)-1-(4-fluorophenyl)-3-(2,2,2-trifluoroethylidene)piperidin-2-one (**3j**)

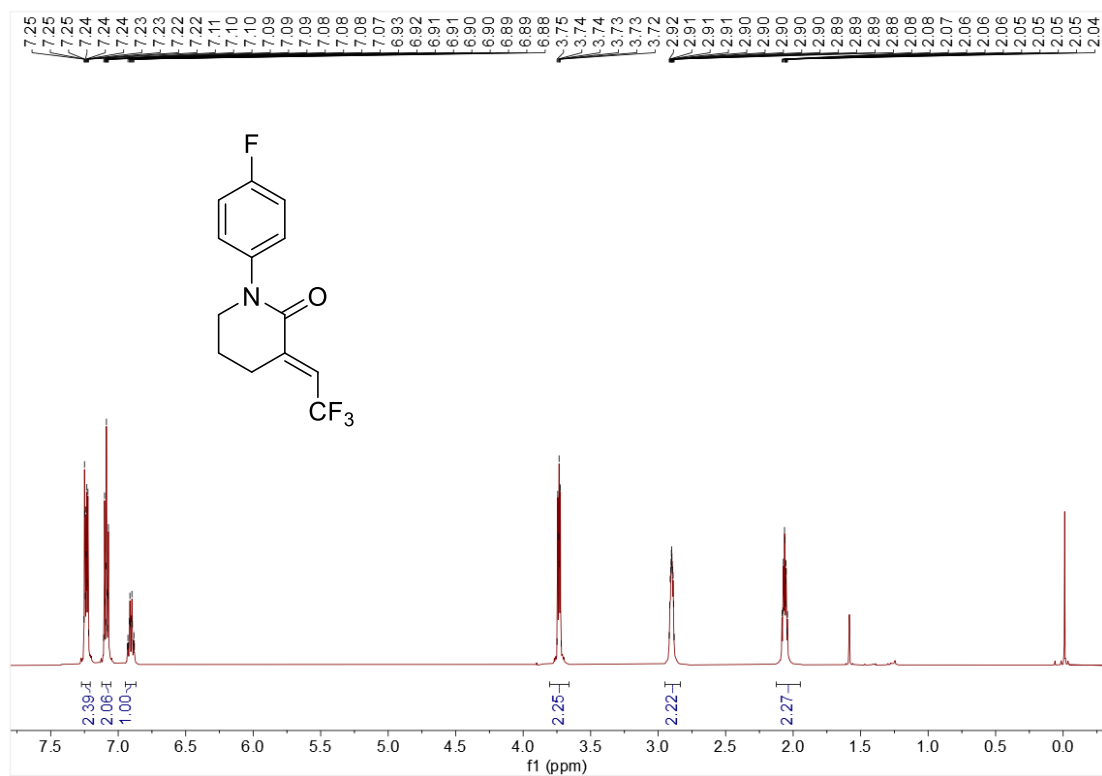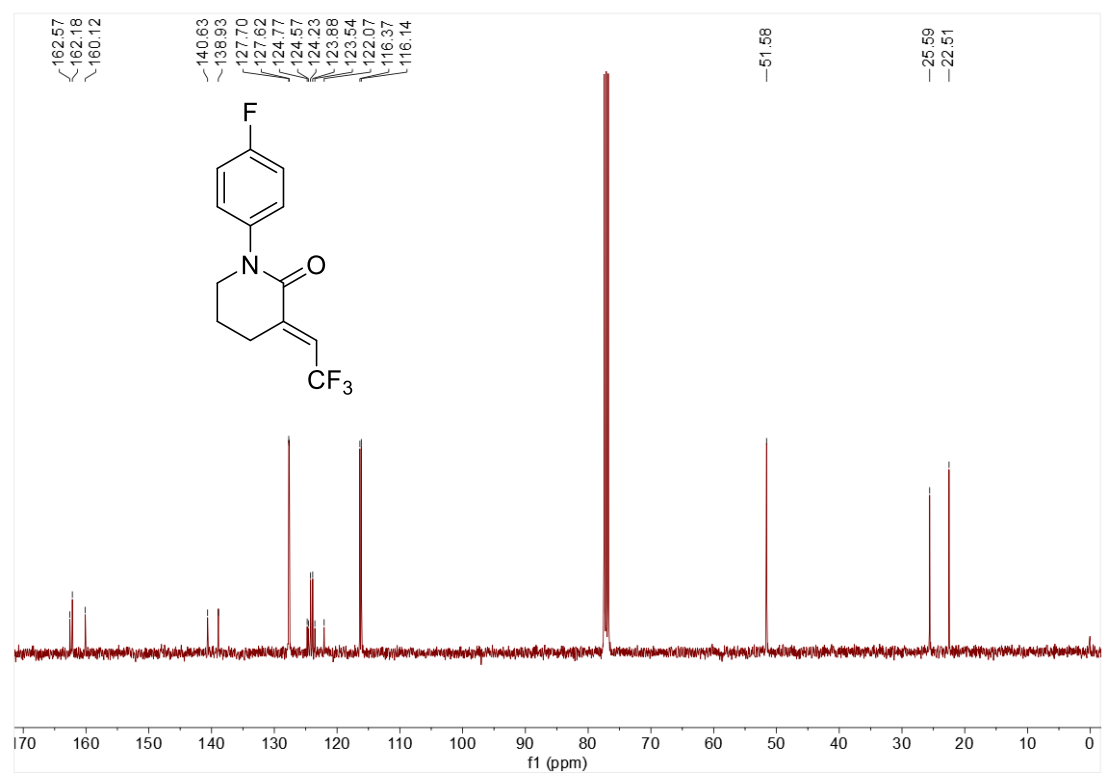

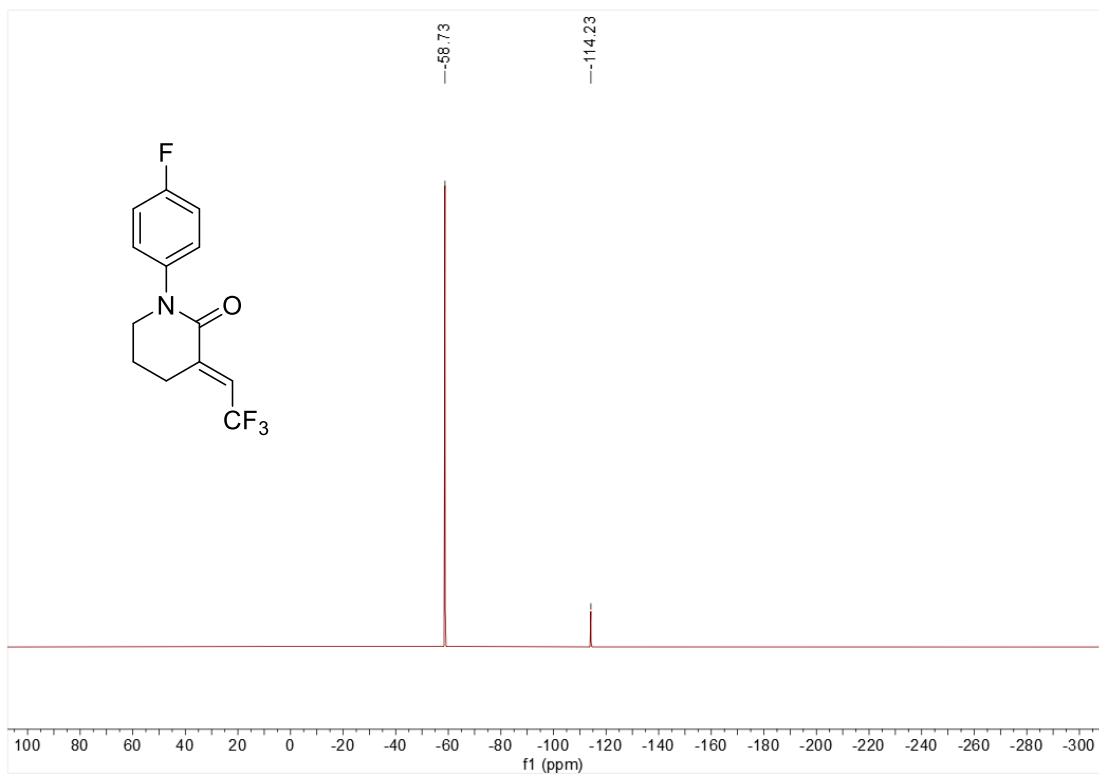

(*E*)-1-([1,1'-biphenyl]-4-yl)-3-(2,2,2-trifluoroethylidene)piperidin-2-one (**3k**)

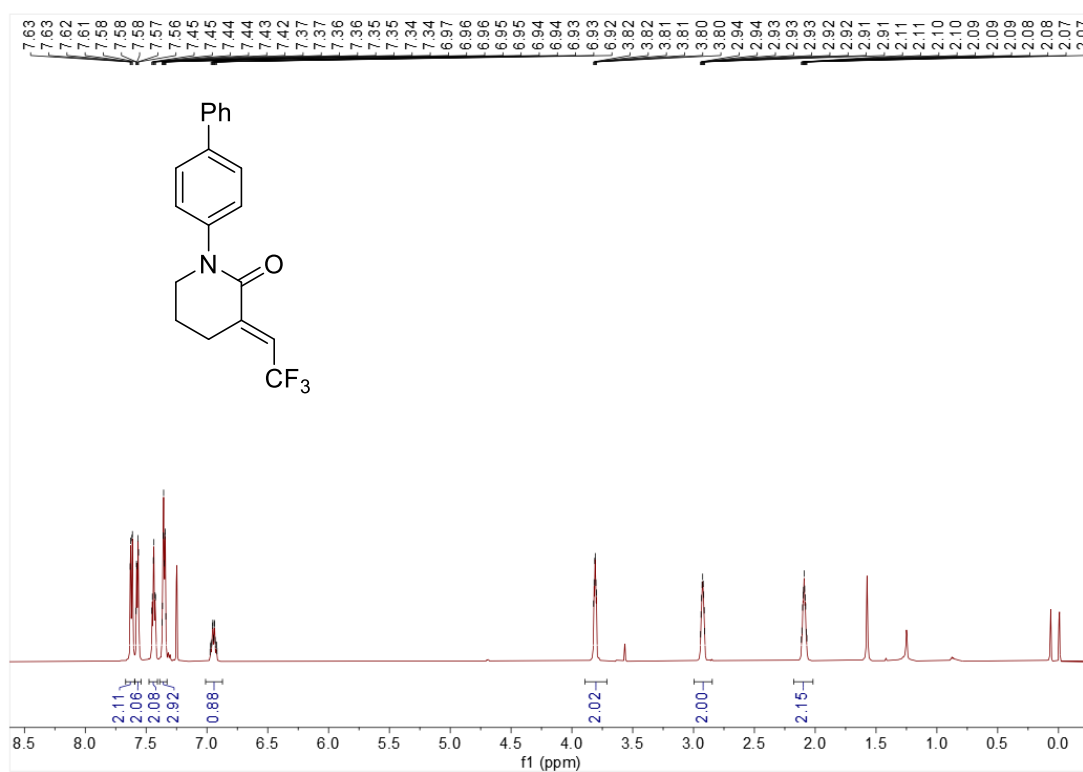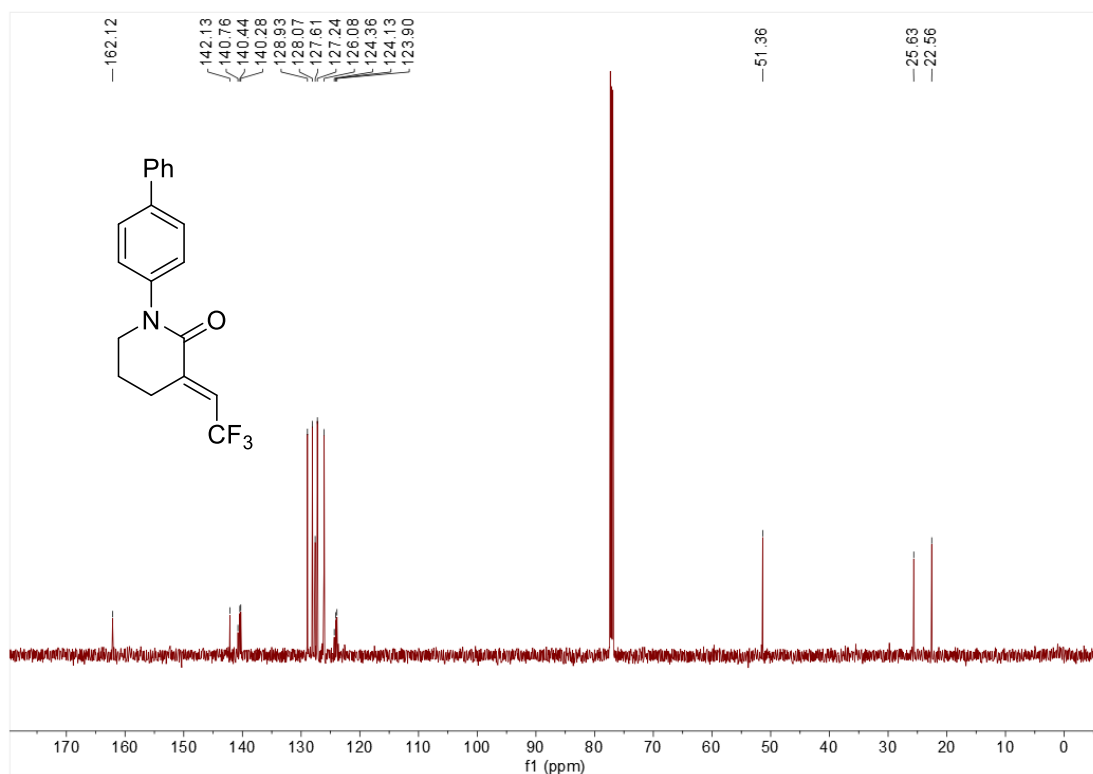

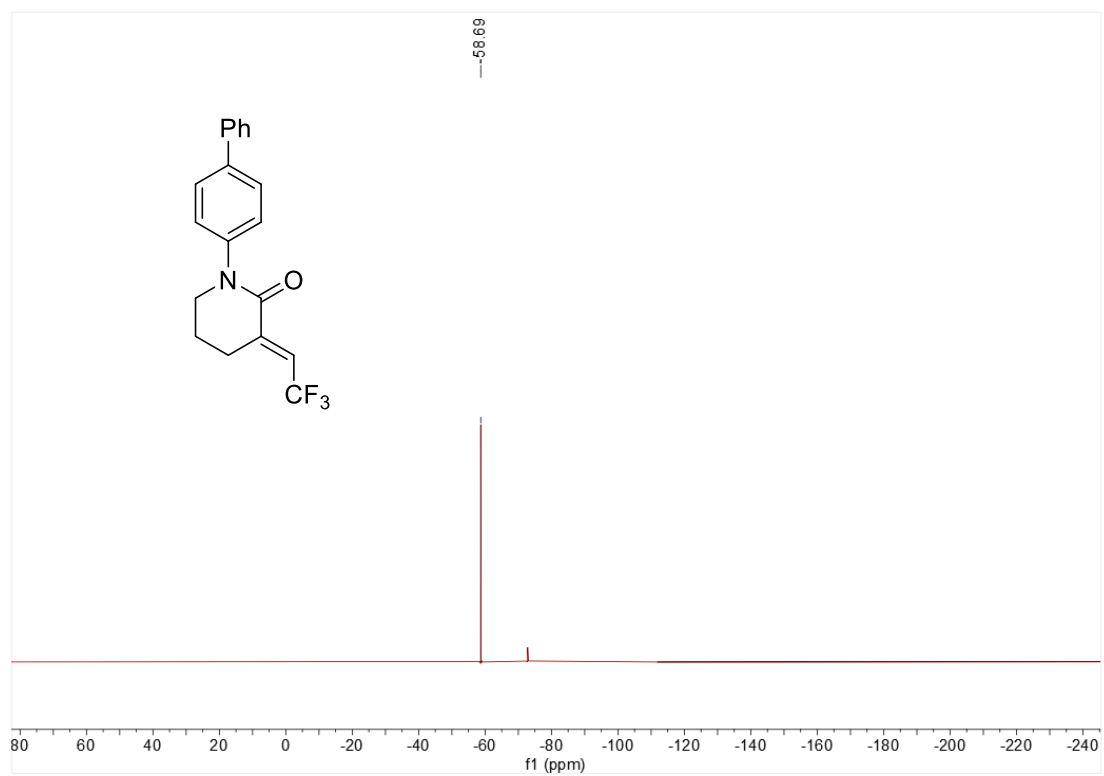



**(E)-1-(3,4-dimethylphenyl)-3-(2,2,2-trifluoroethylidene)piperidin-2-one (31)**

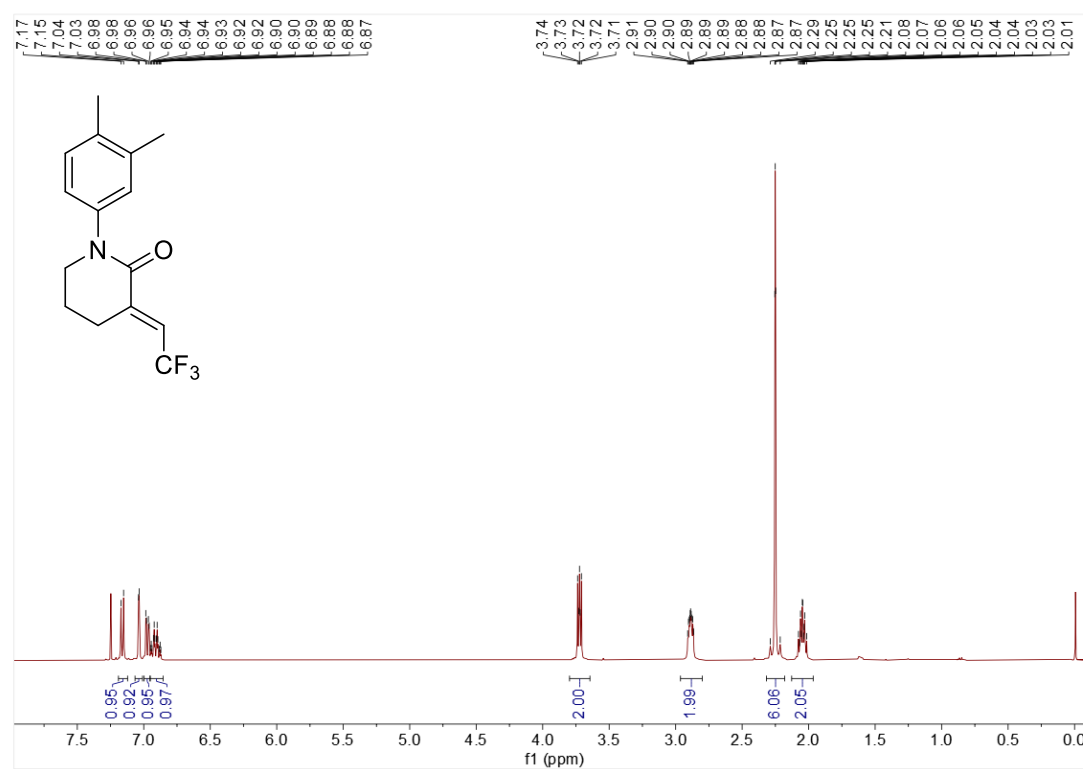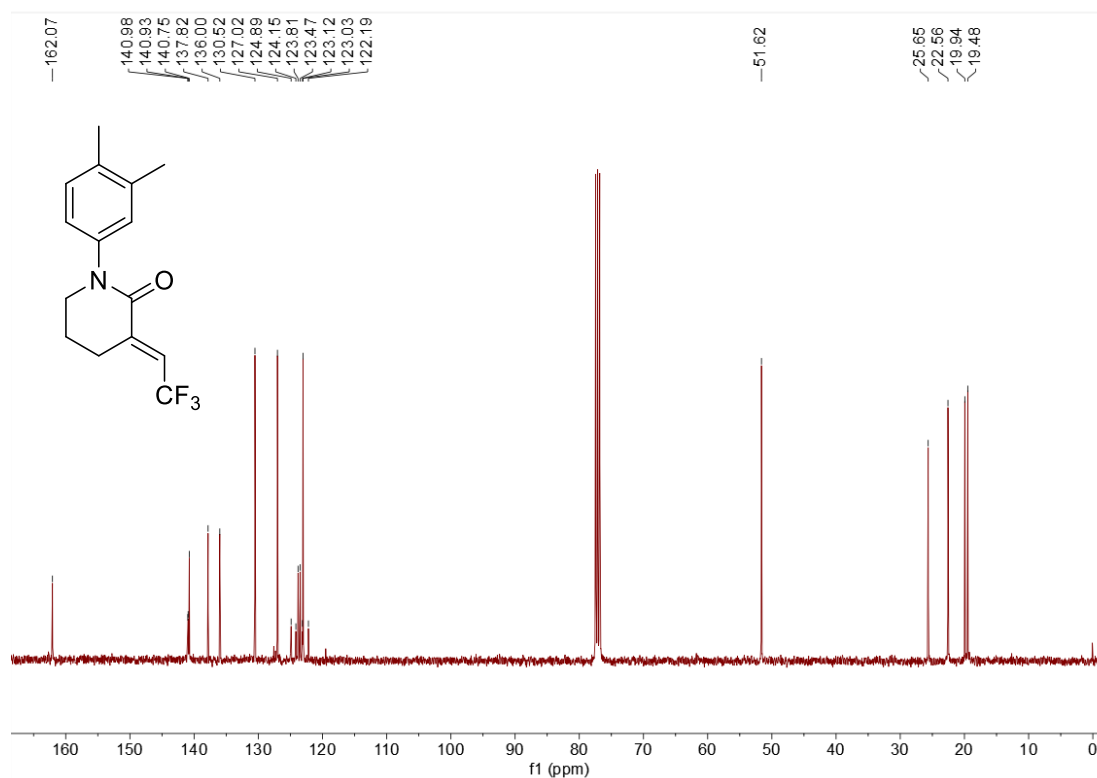

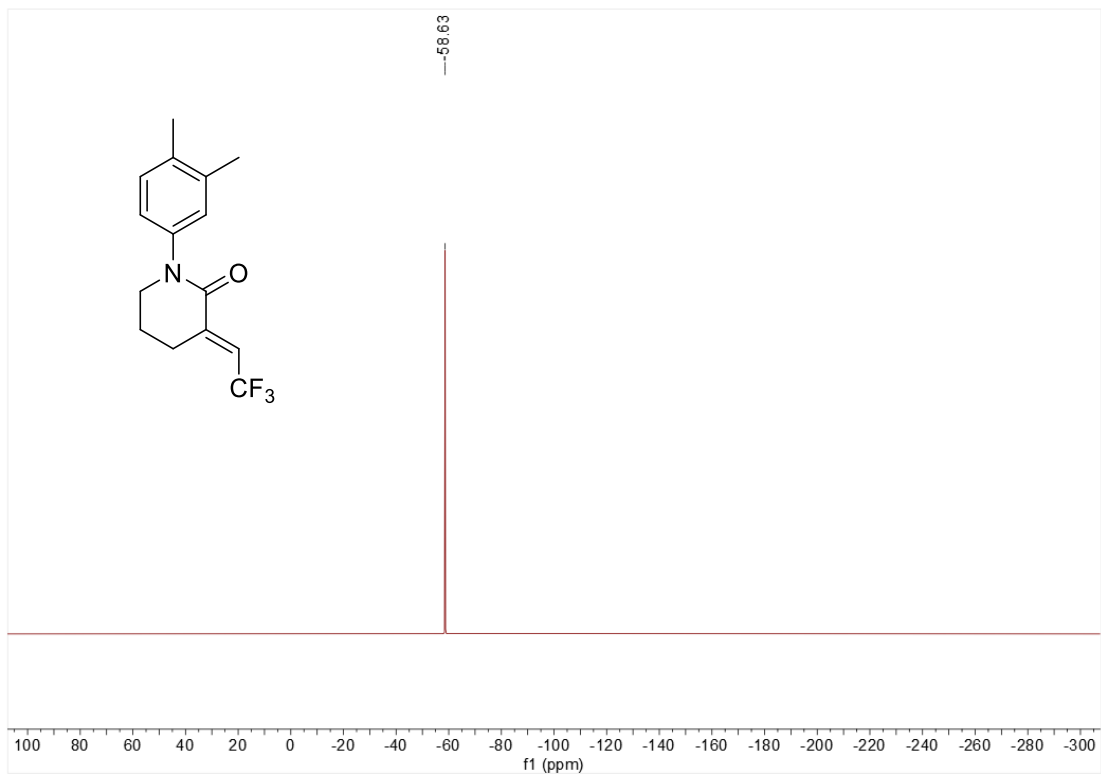

(E)-1-(3,5-dimethylphenyl)-3-(2,2,2-trifluoroethylidene)piperidin-2-one (**3m**)

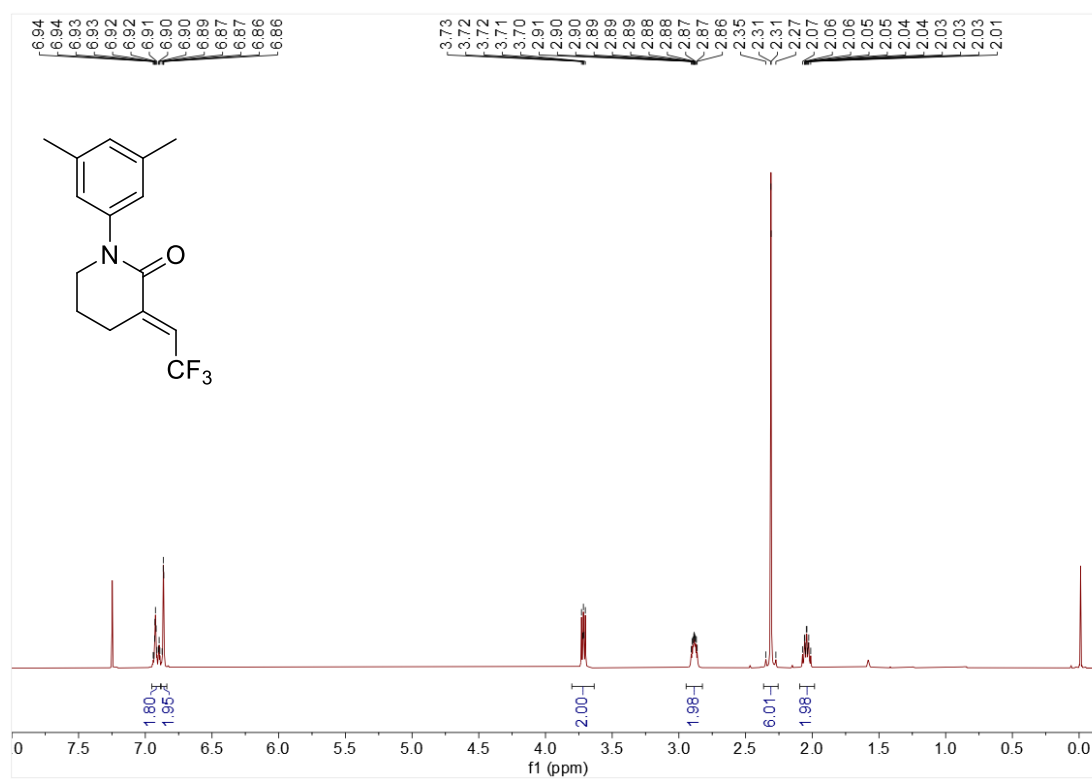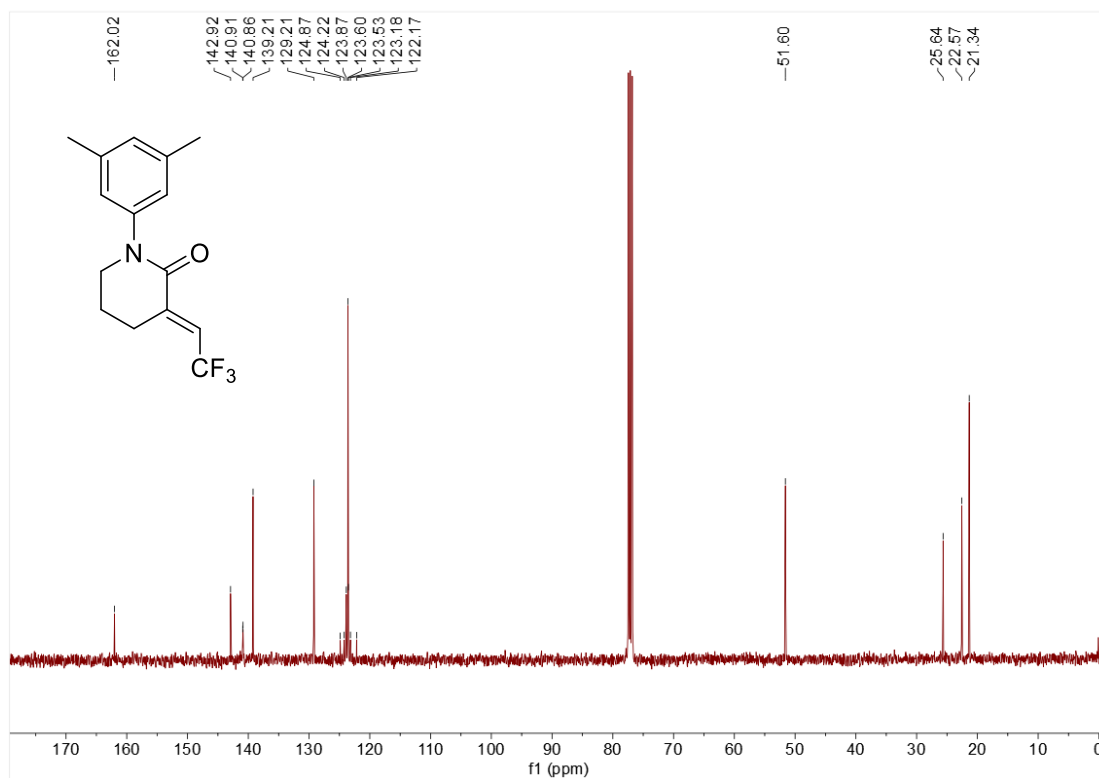

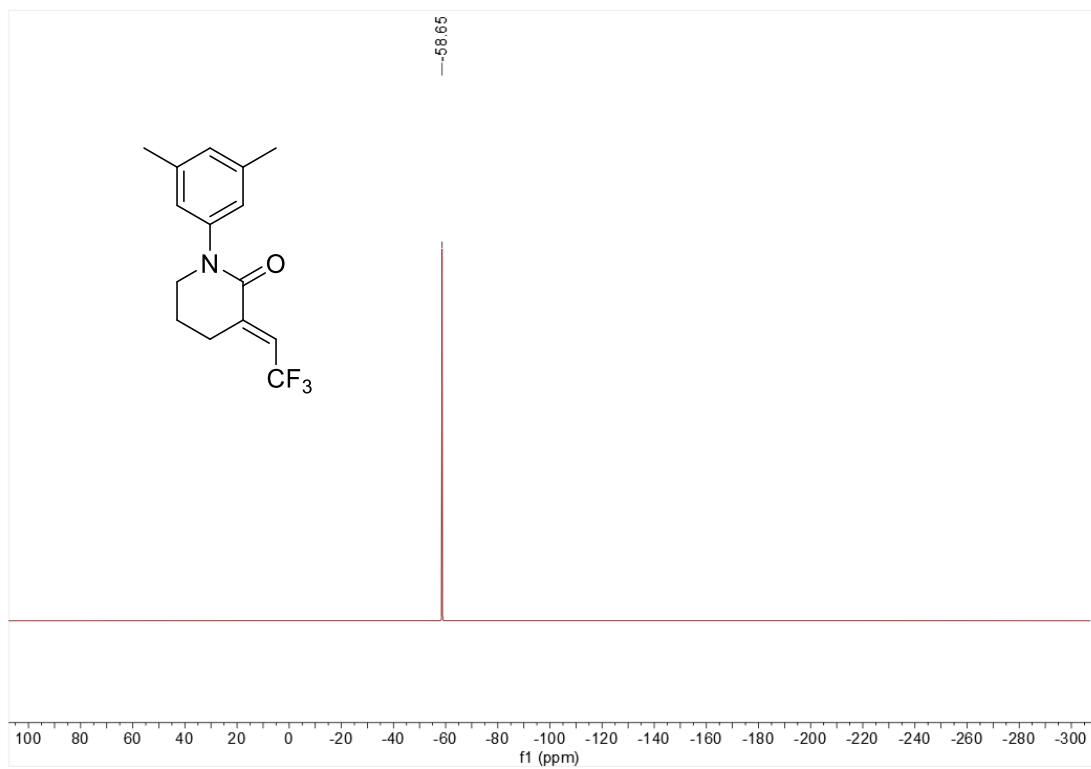

# 1-phenyl-3-(2,2,2-trifluoroethyl)pyrrolidin-2-one (**2a**)

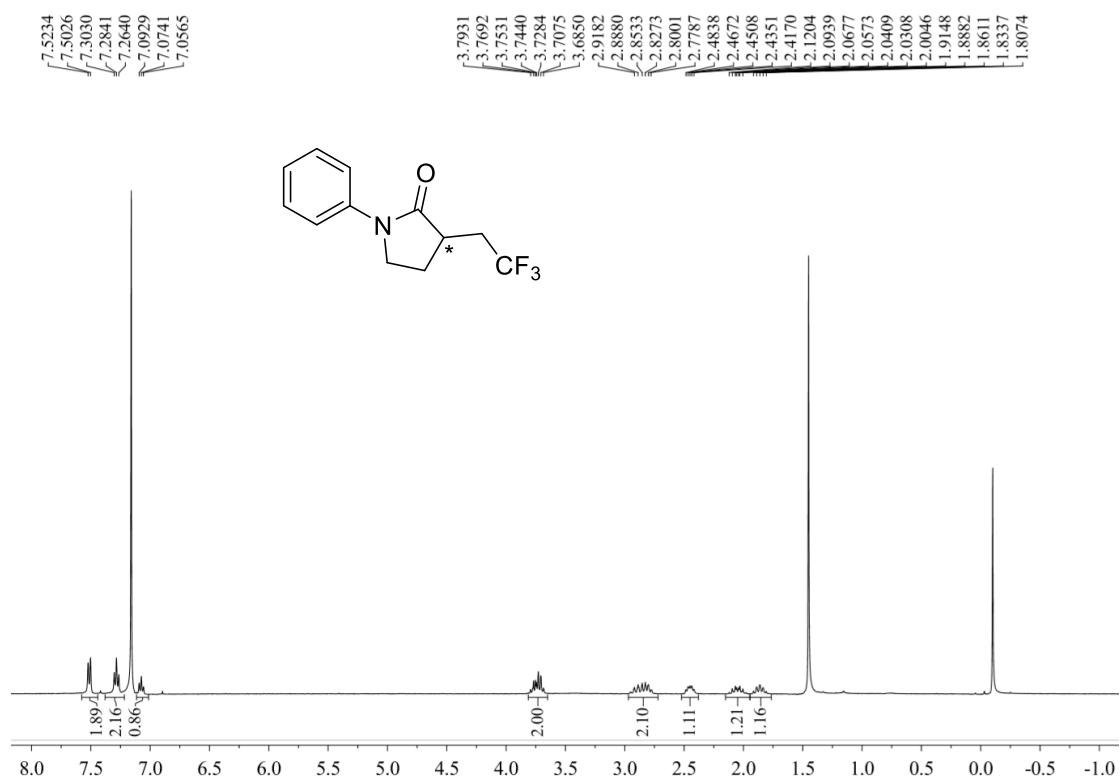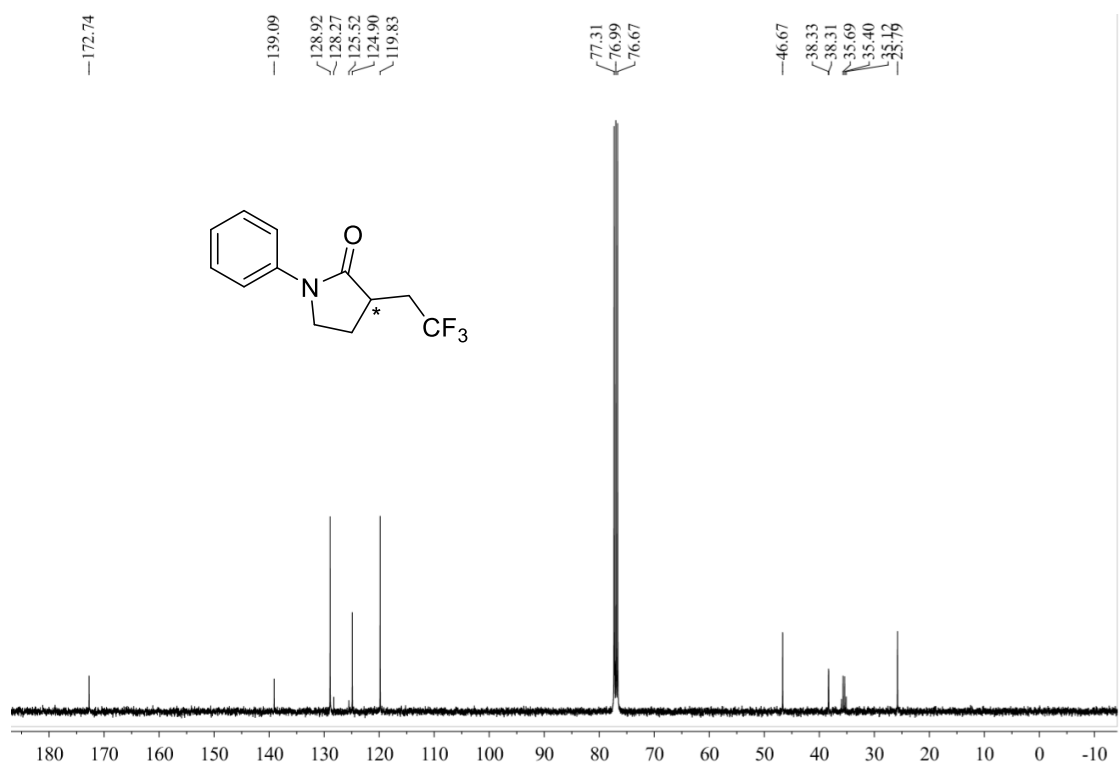

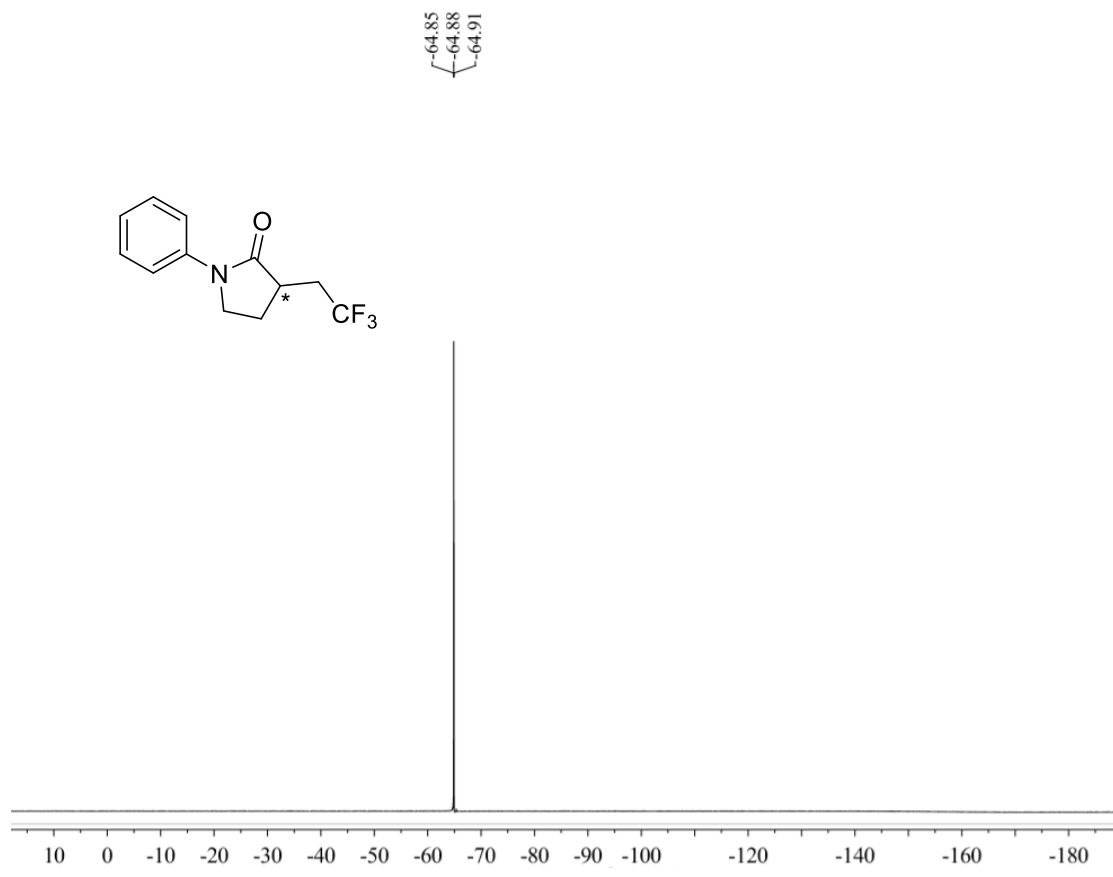

1-(*m*-tolyl)-3-(2,2,2-trifluoroethyl)pyrrolidin-2-one (**2b**)

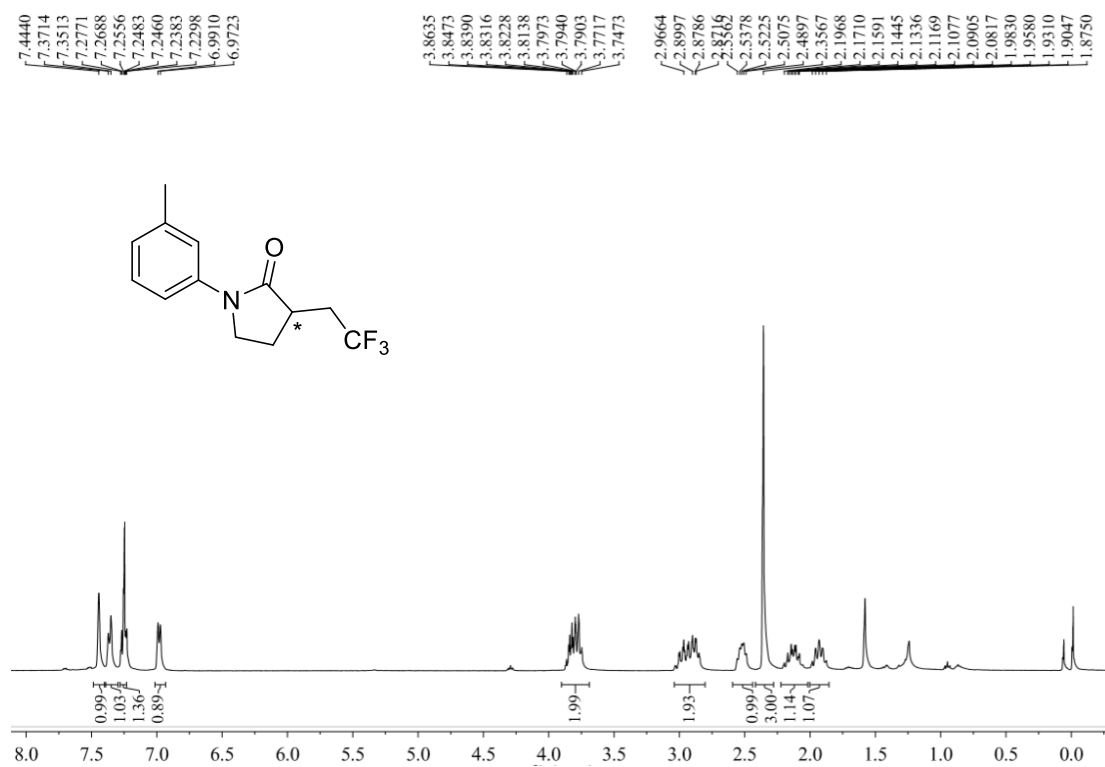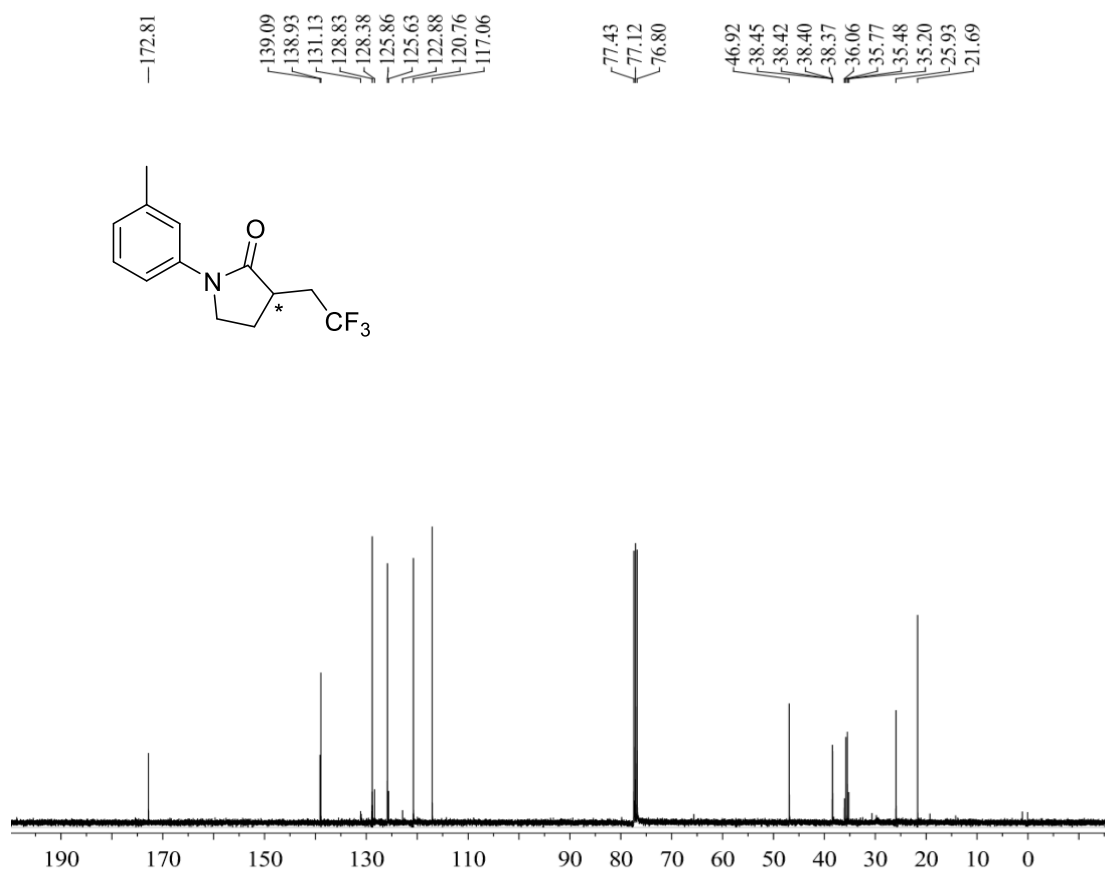

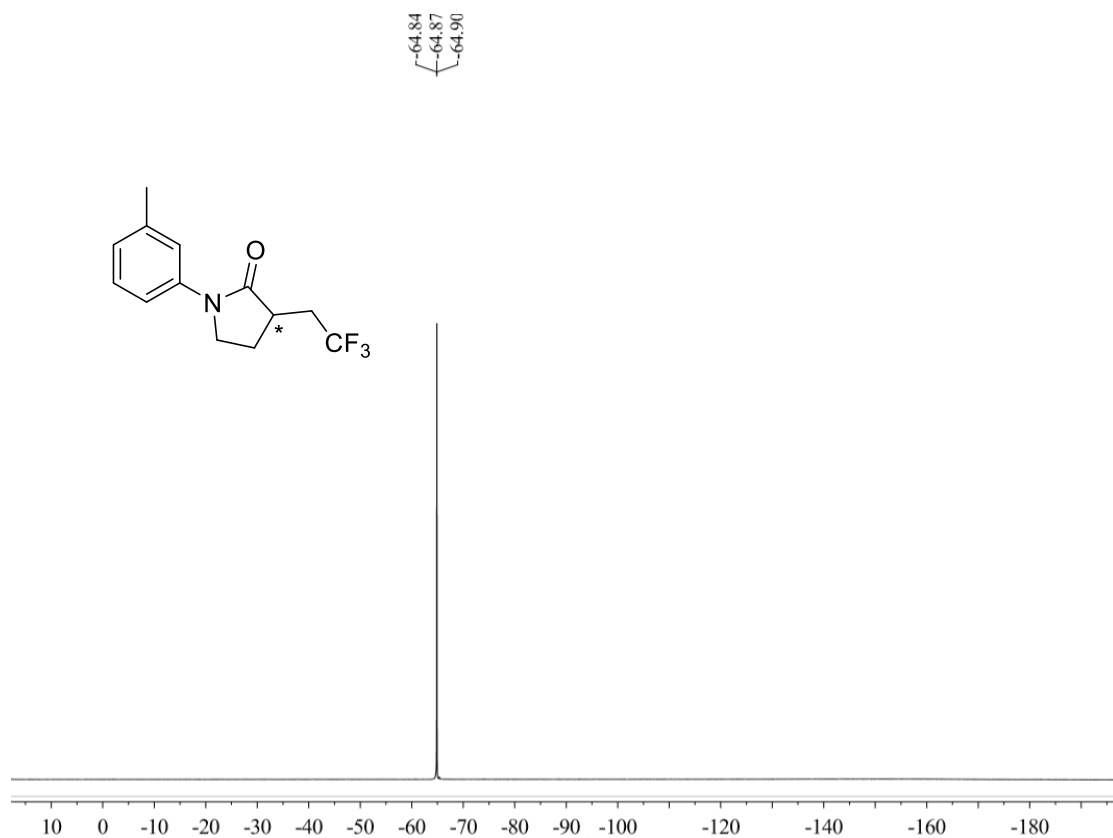



1-(3-methoxyphenyl)-3-(2,2,2-trifluoroethyl)pyrrolidin-2-one (**2c**)

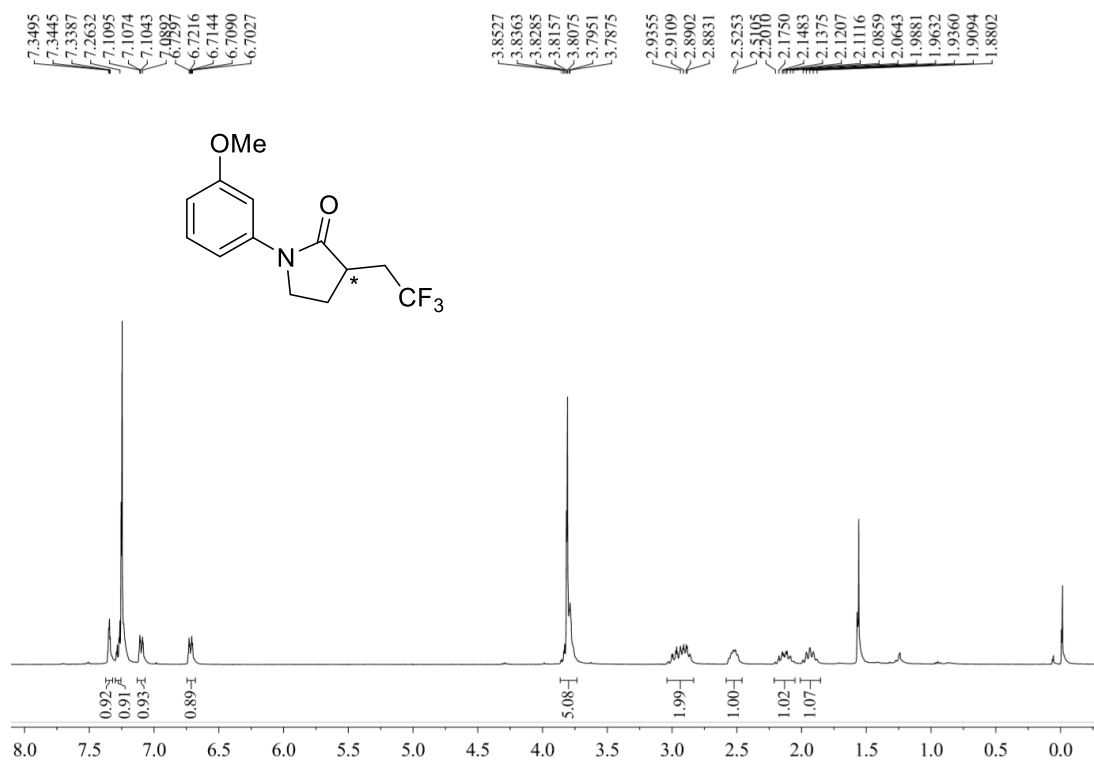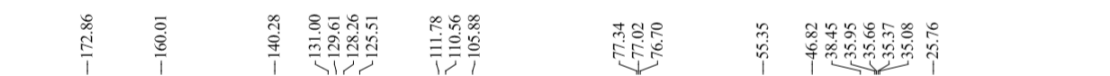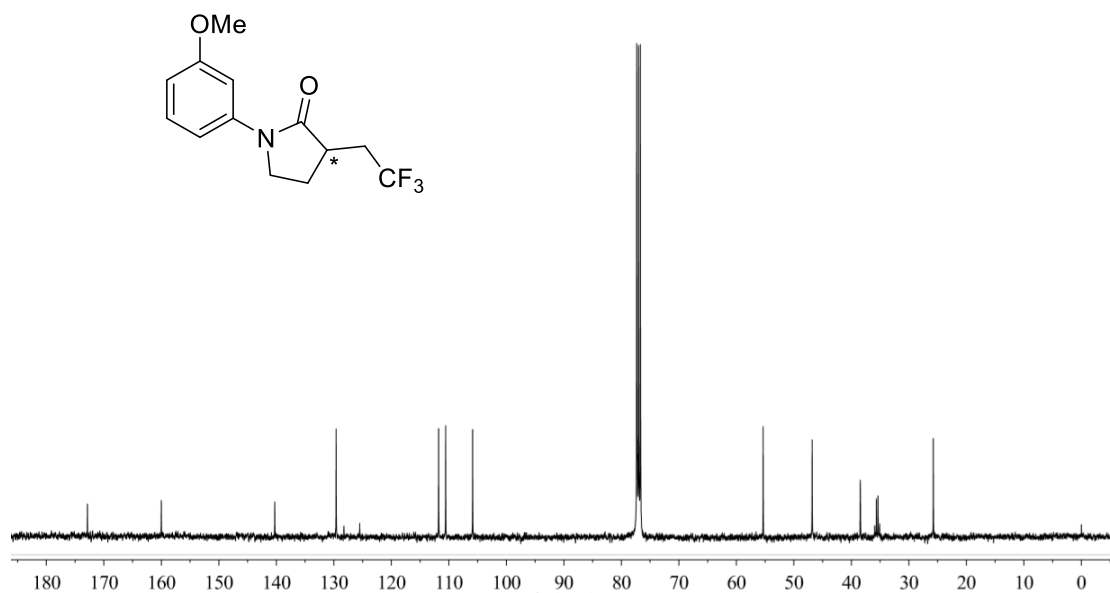

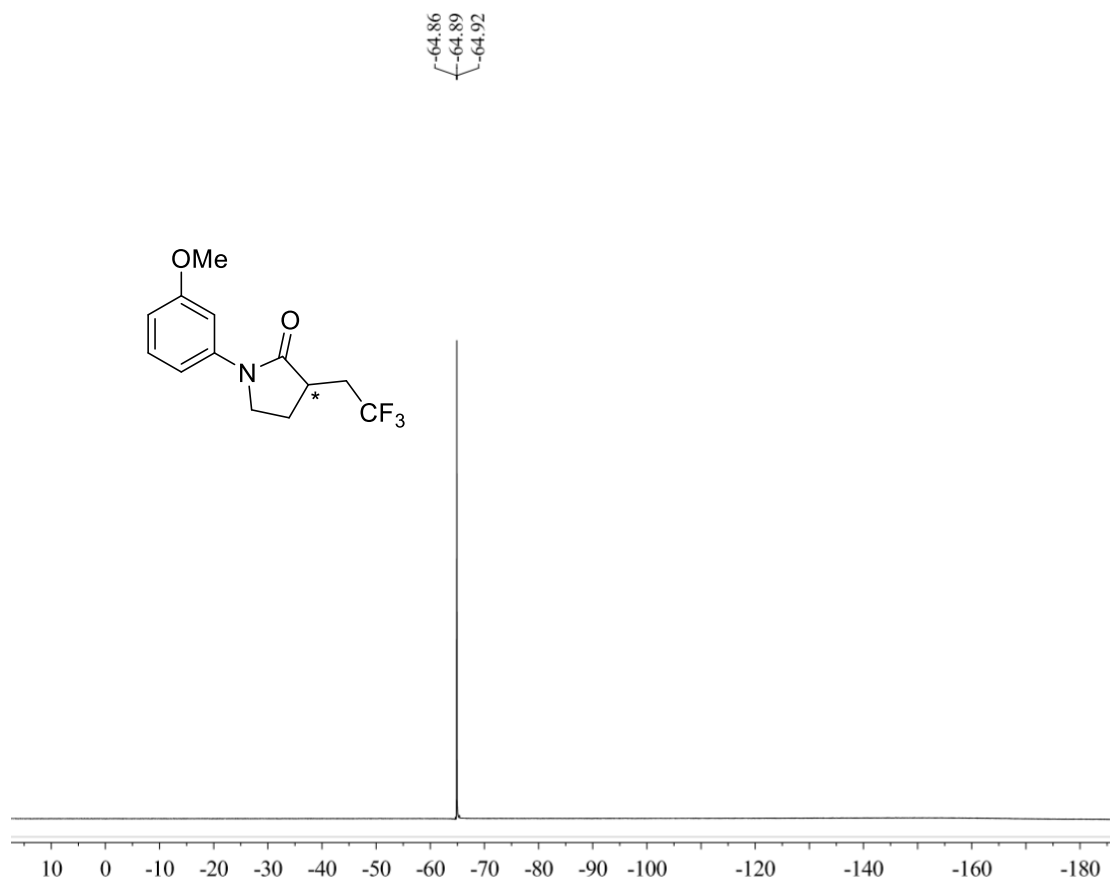

1-(*p*-tolyl)-3-(2,2,2-trifluoroethyl)pyrrolidin-2-one (**2d**)

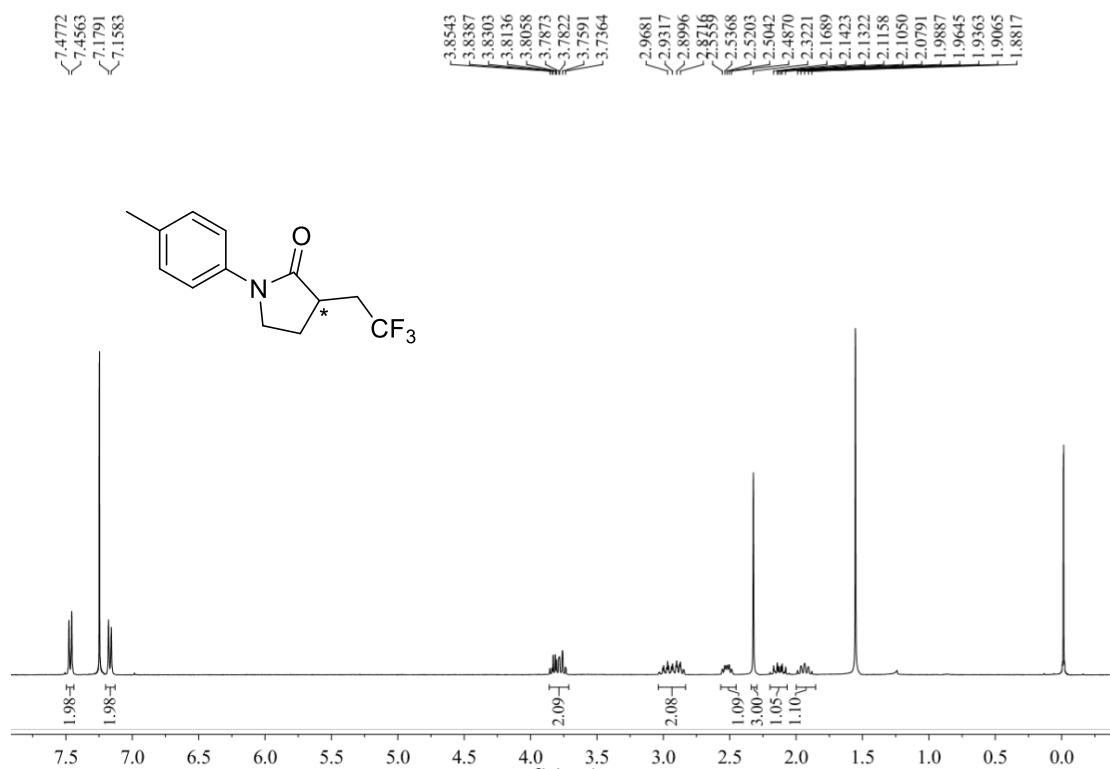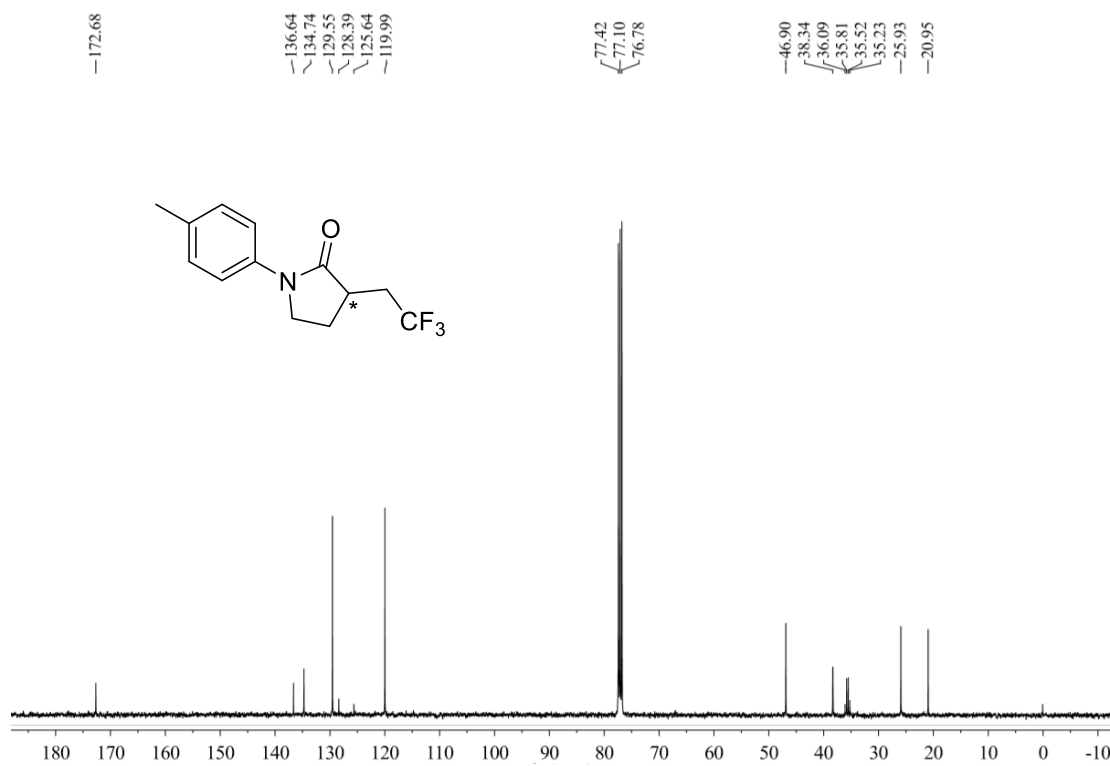

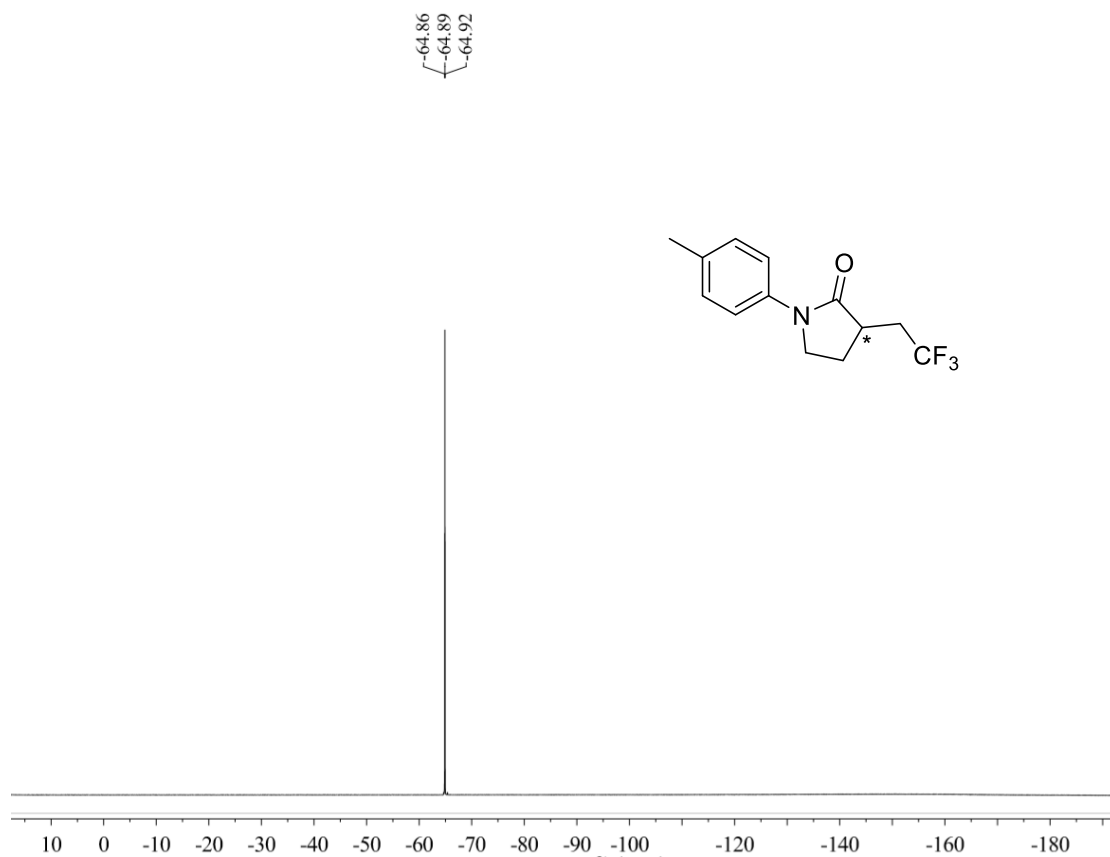

1-(4-methoxyphenyl)-3-(2,2,2-trifluoroethyl)pyrrolidin-2-one (**2e**)

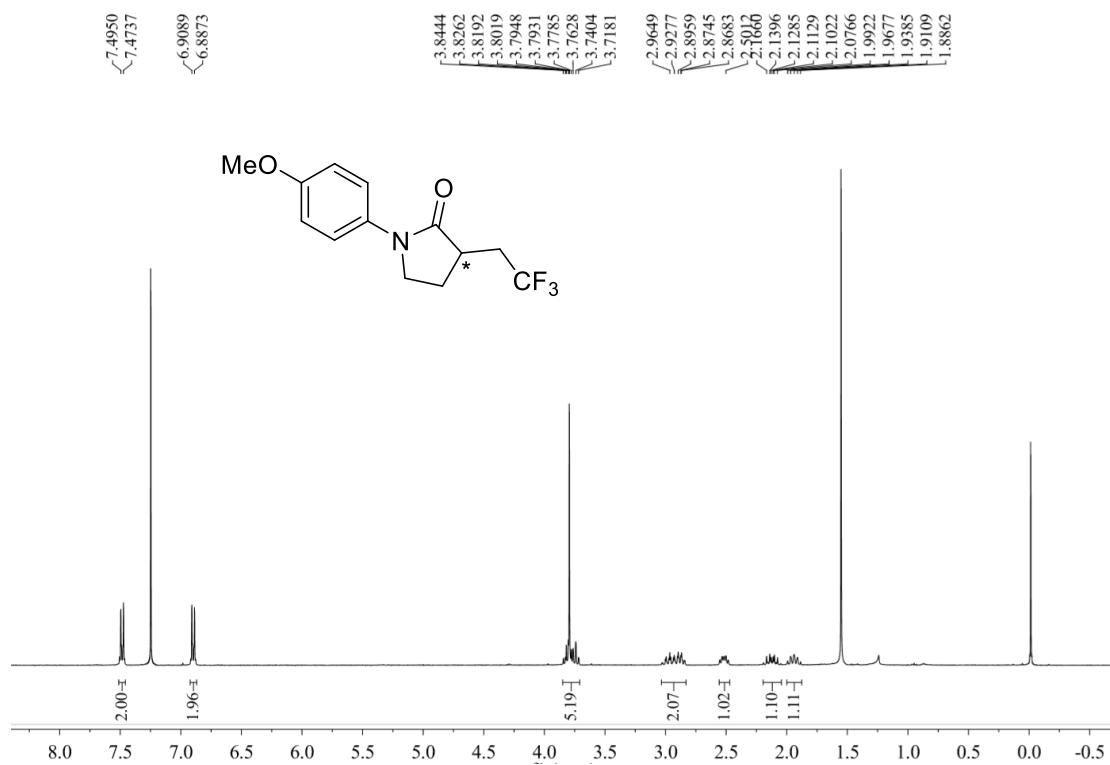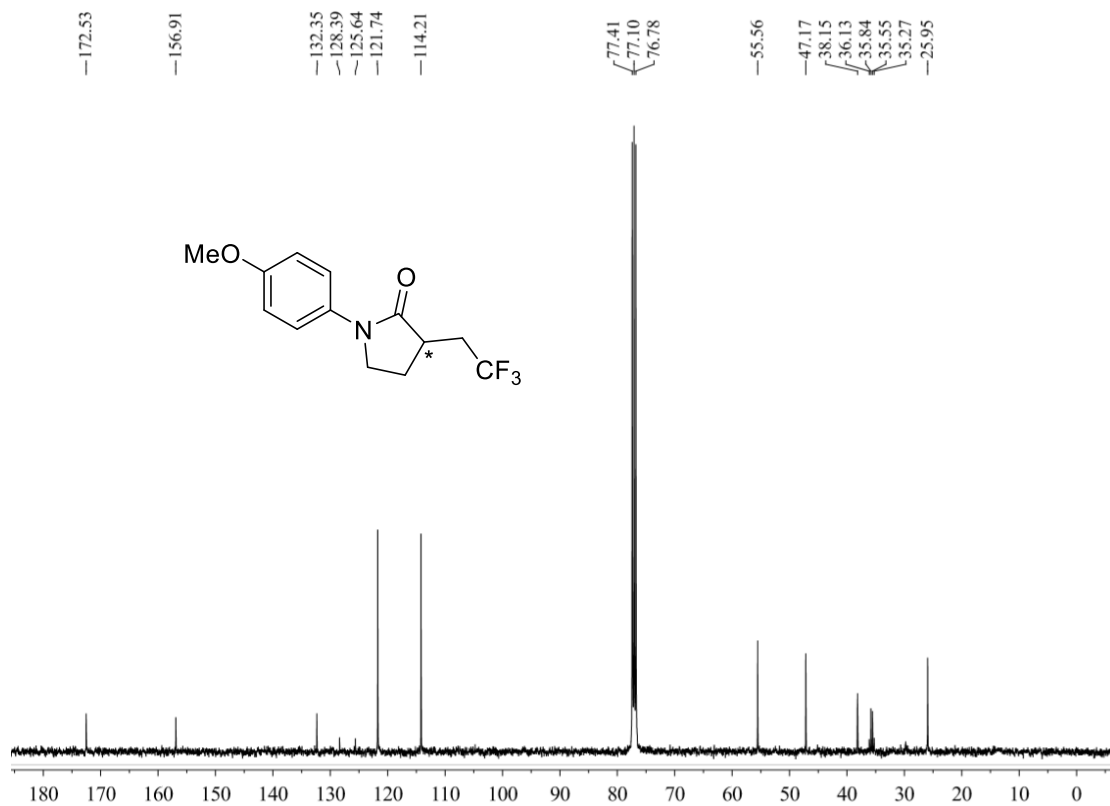

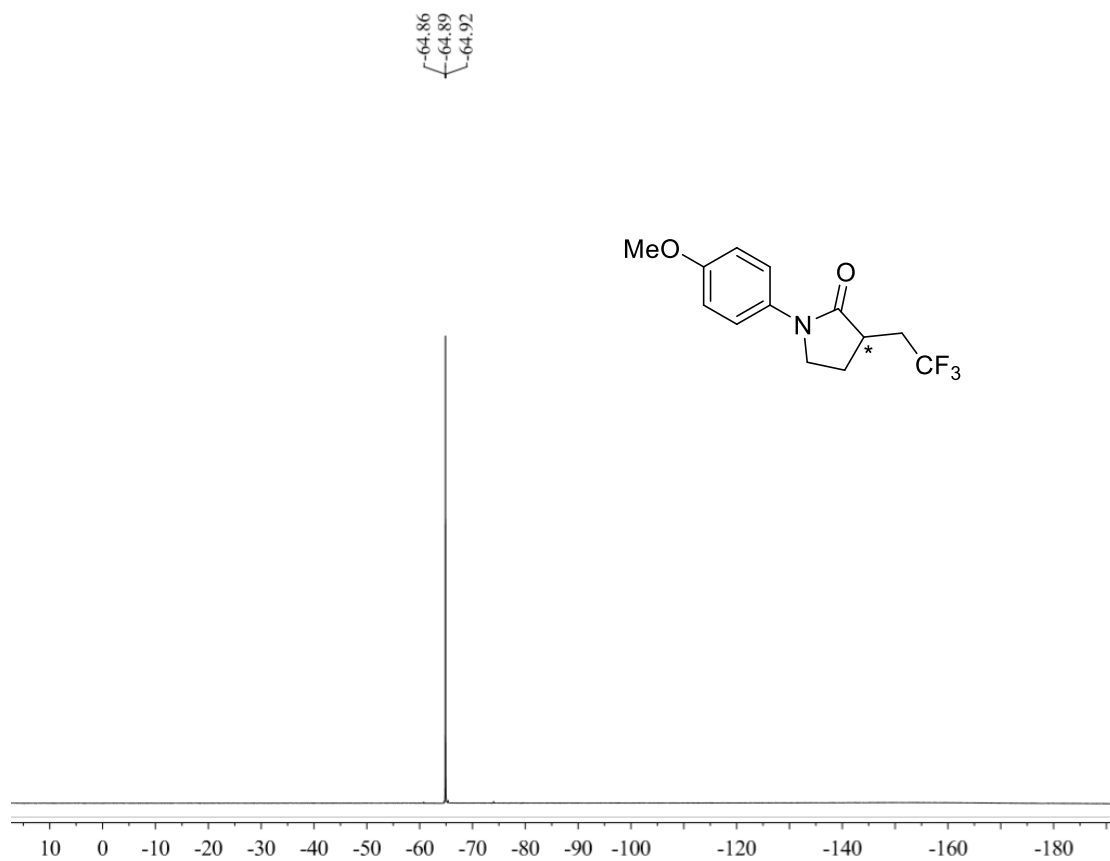

1-(3-fluorophenyl)-3-(2,2,2-trifluoroethyl)pyrrolidin-2-one (**2f**)

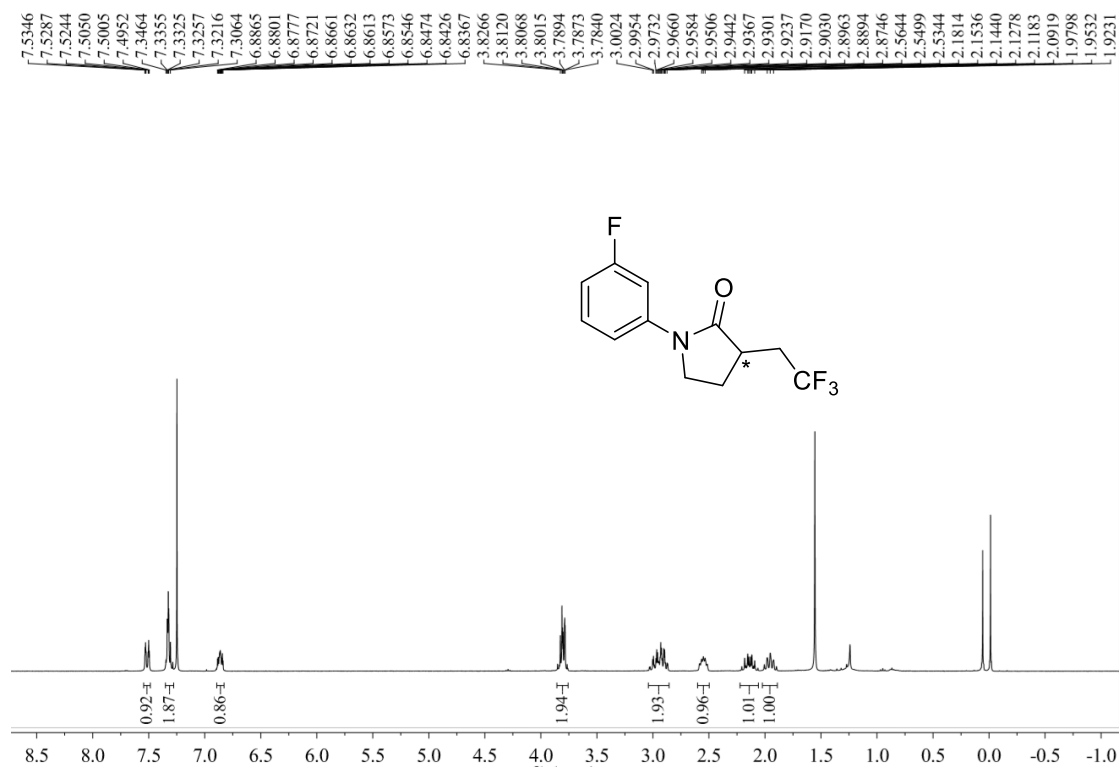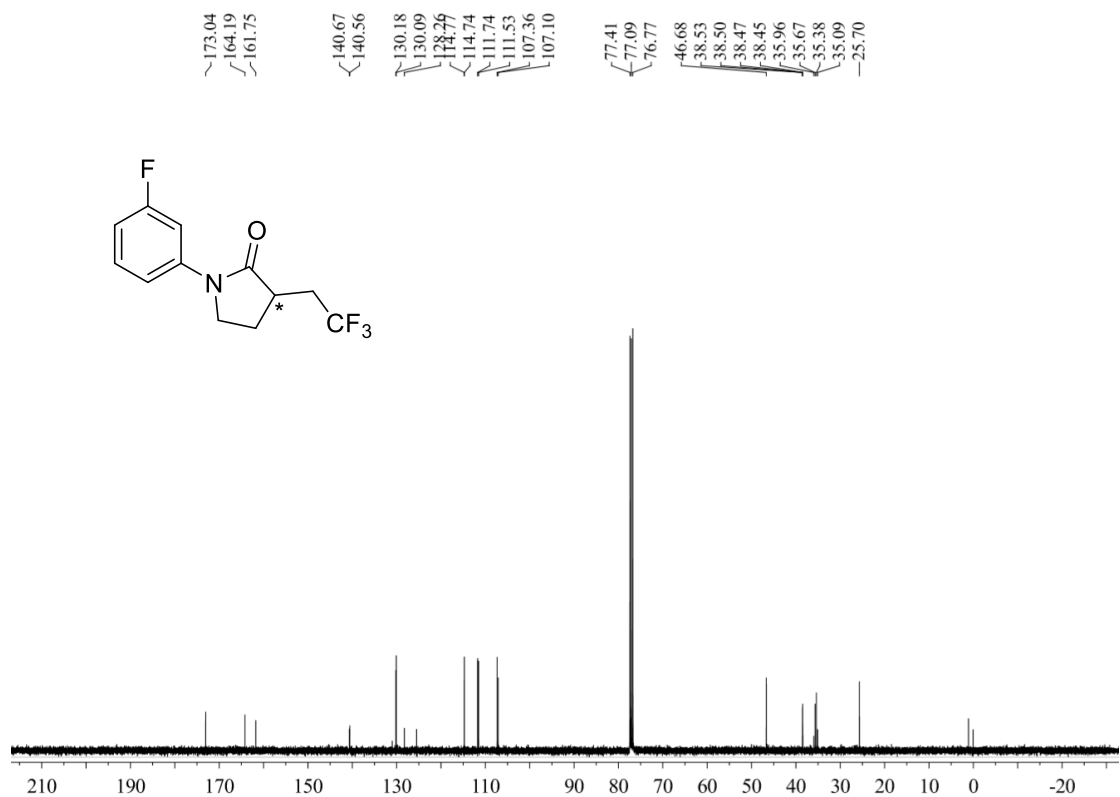

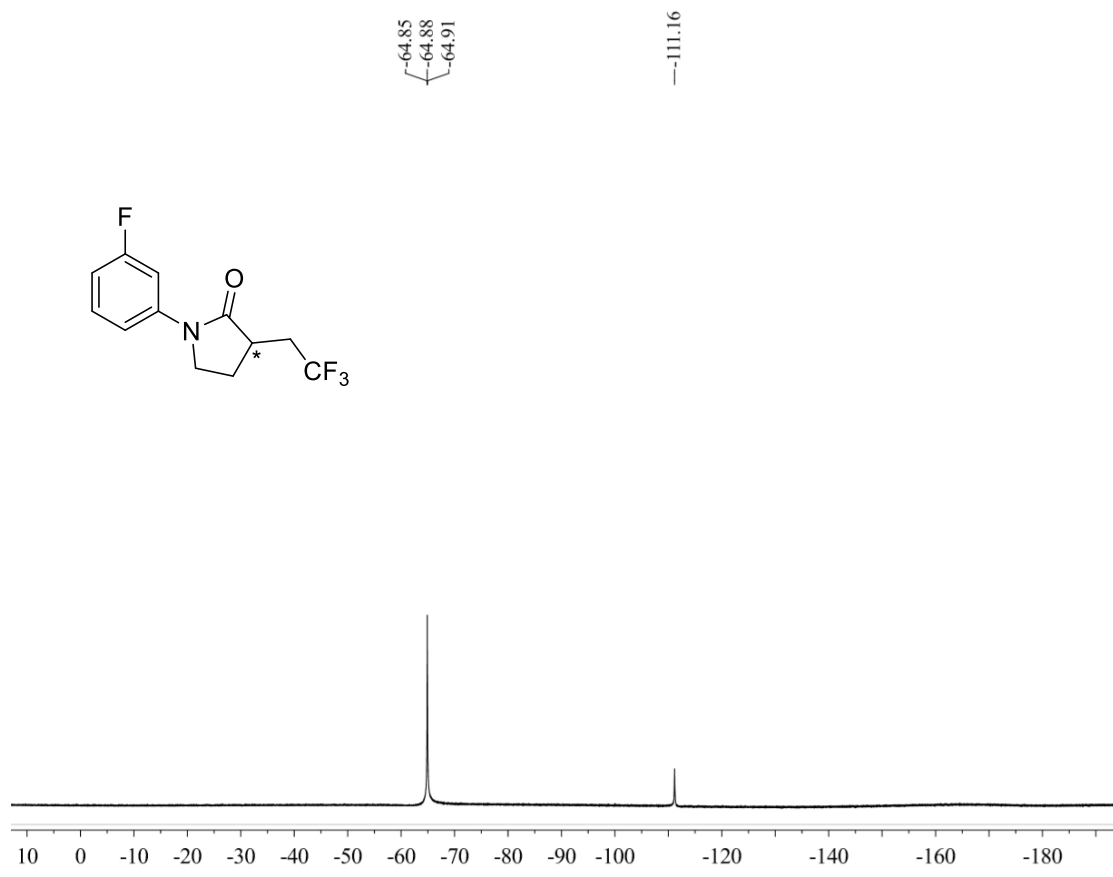



1-(4-fluorophenyl)-3-(2,2,2-trifluoroethyl)pyrrolidin-2-one (**2g**)

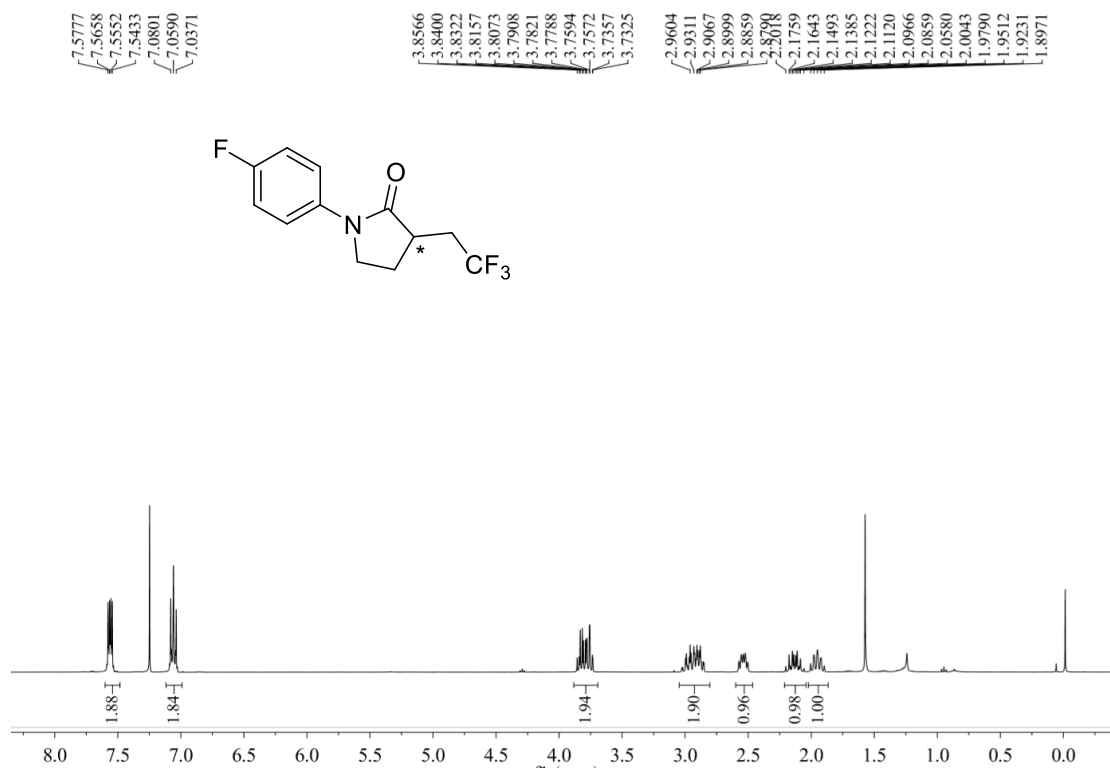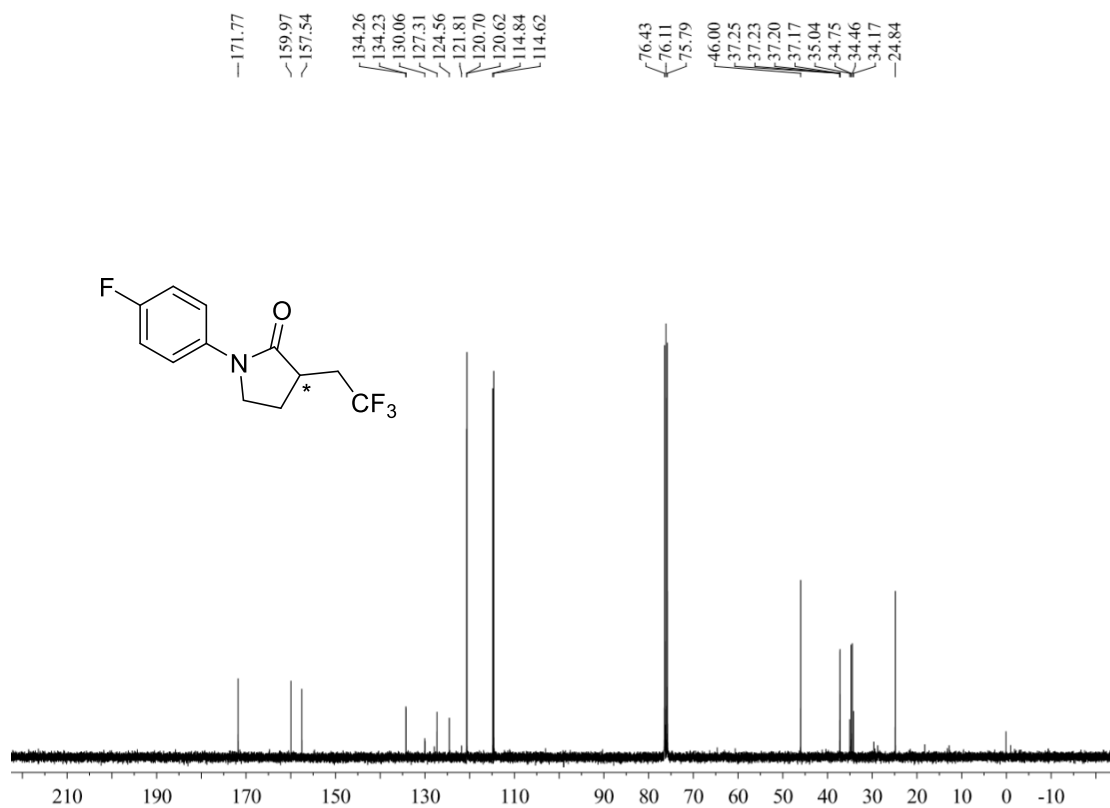

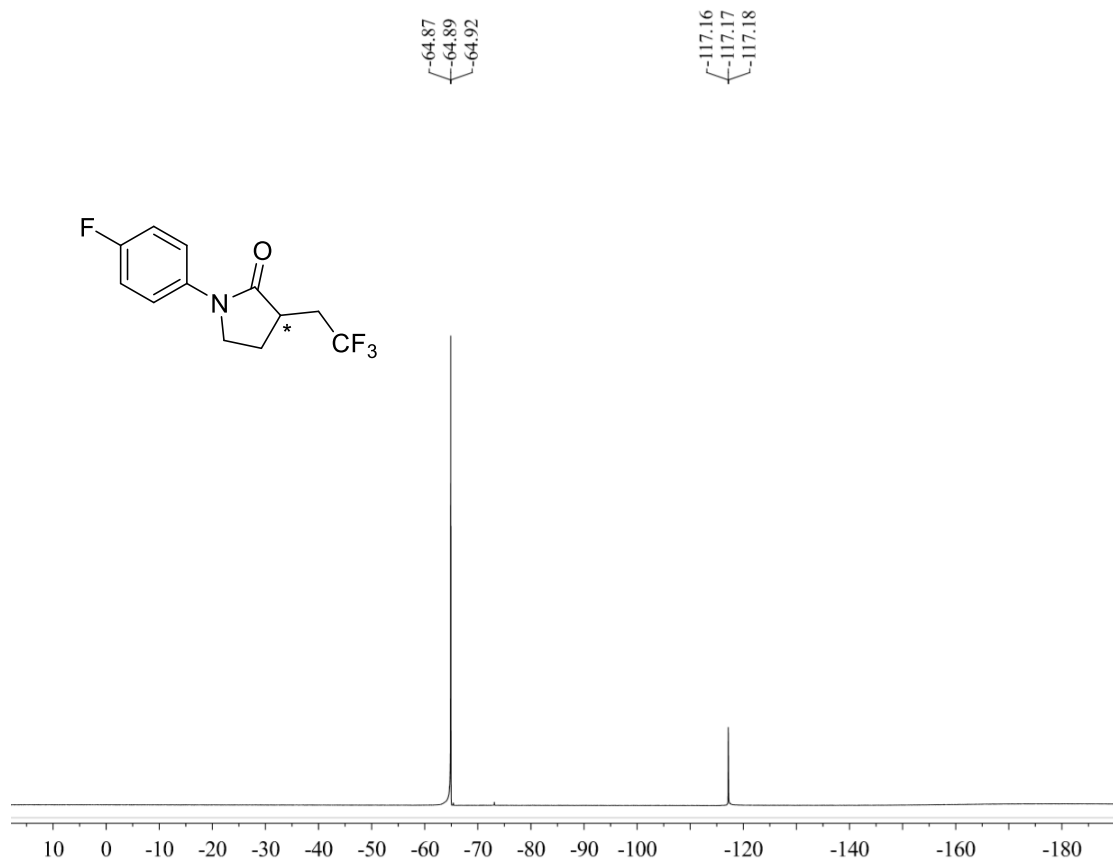

1-(3-bromophenyl)-3-(2,2,2-trifluoroethyl)pyrrolidin-2-one (**2h**)

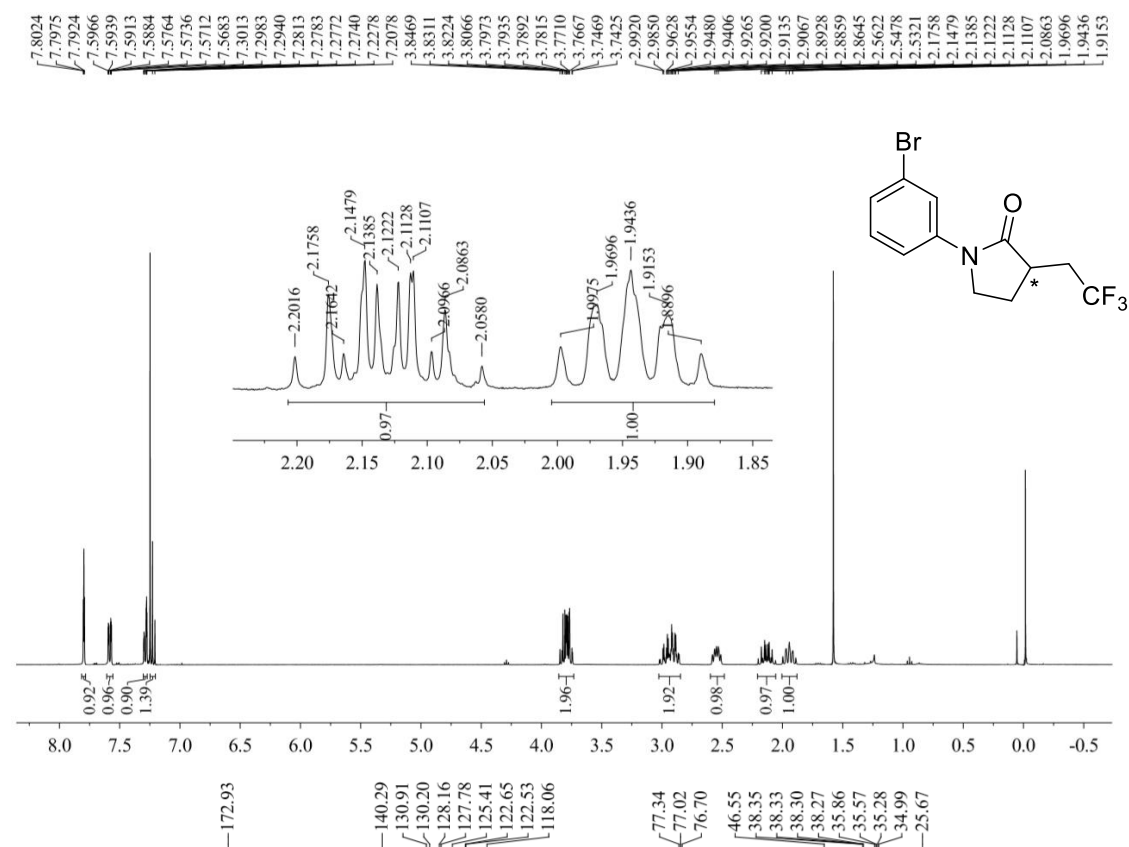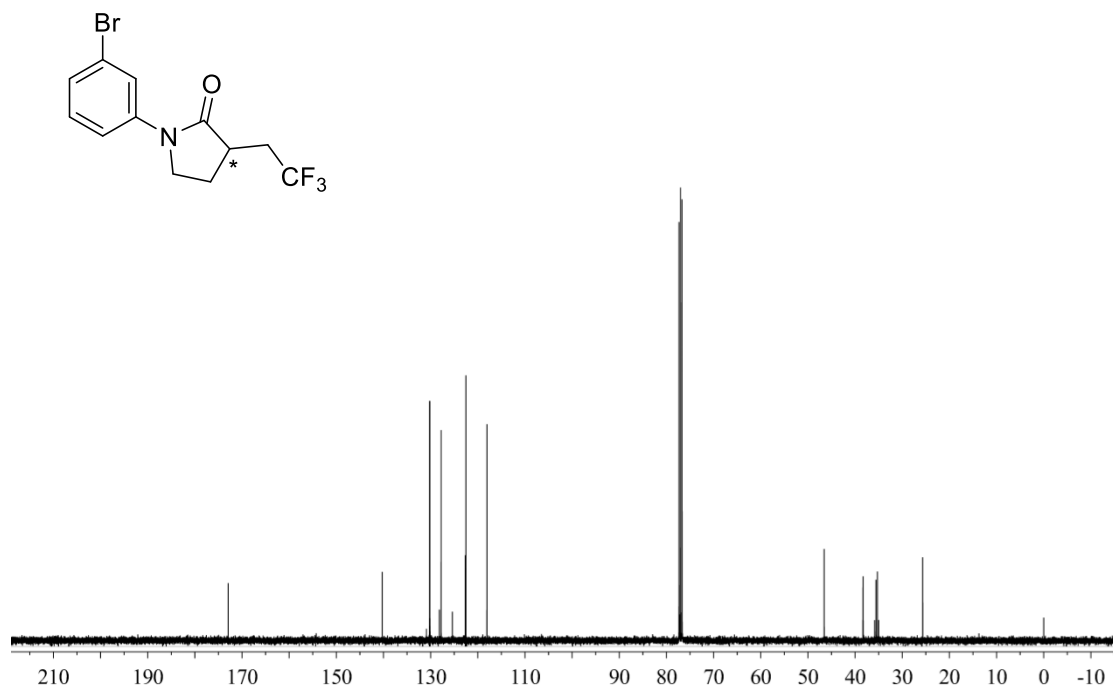

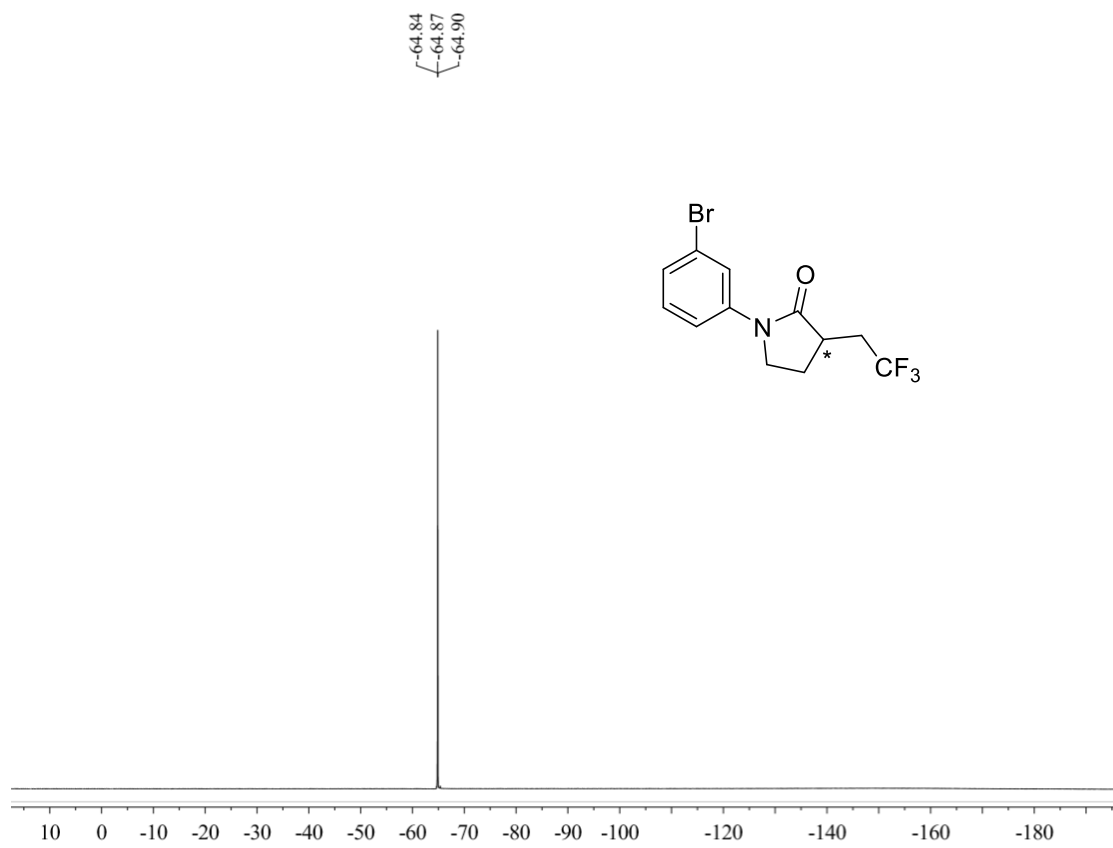

1-(4-(*tert*-butyl)phenyl)-3-(2,2,2-trifluoroethyl)pyrrolidin-2-one (**2i**)

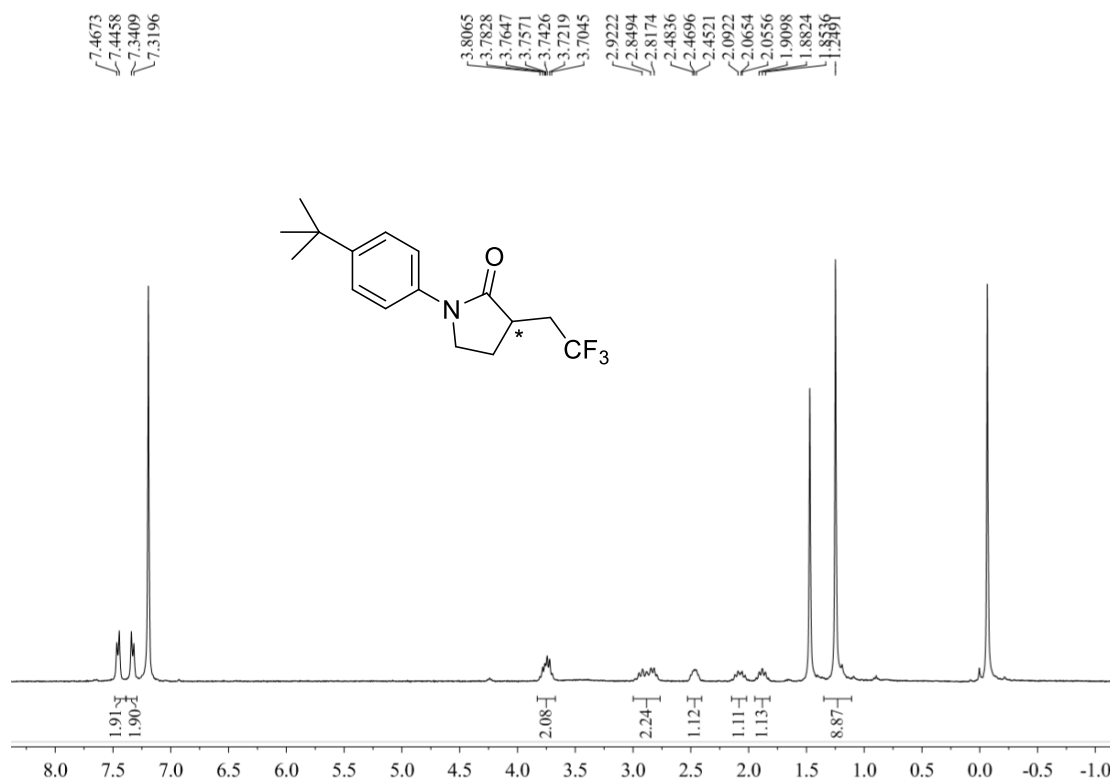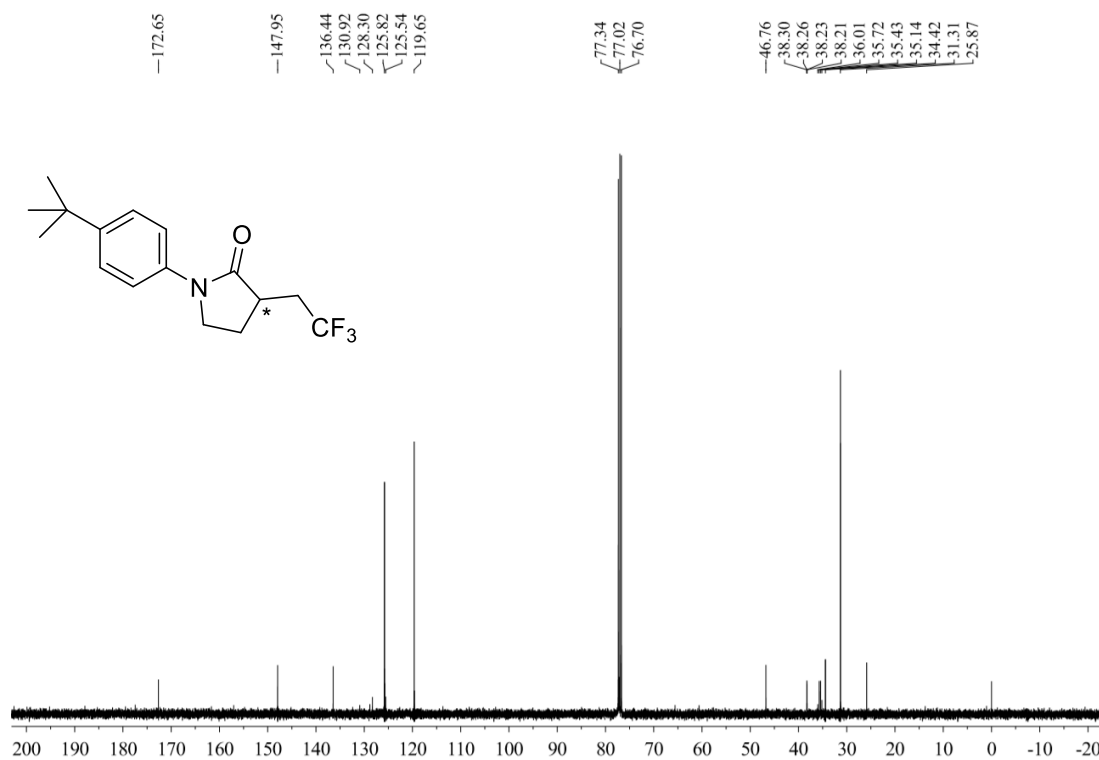

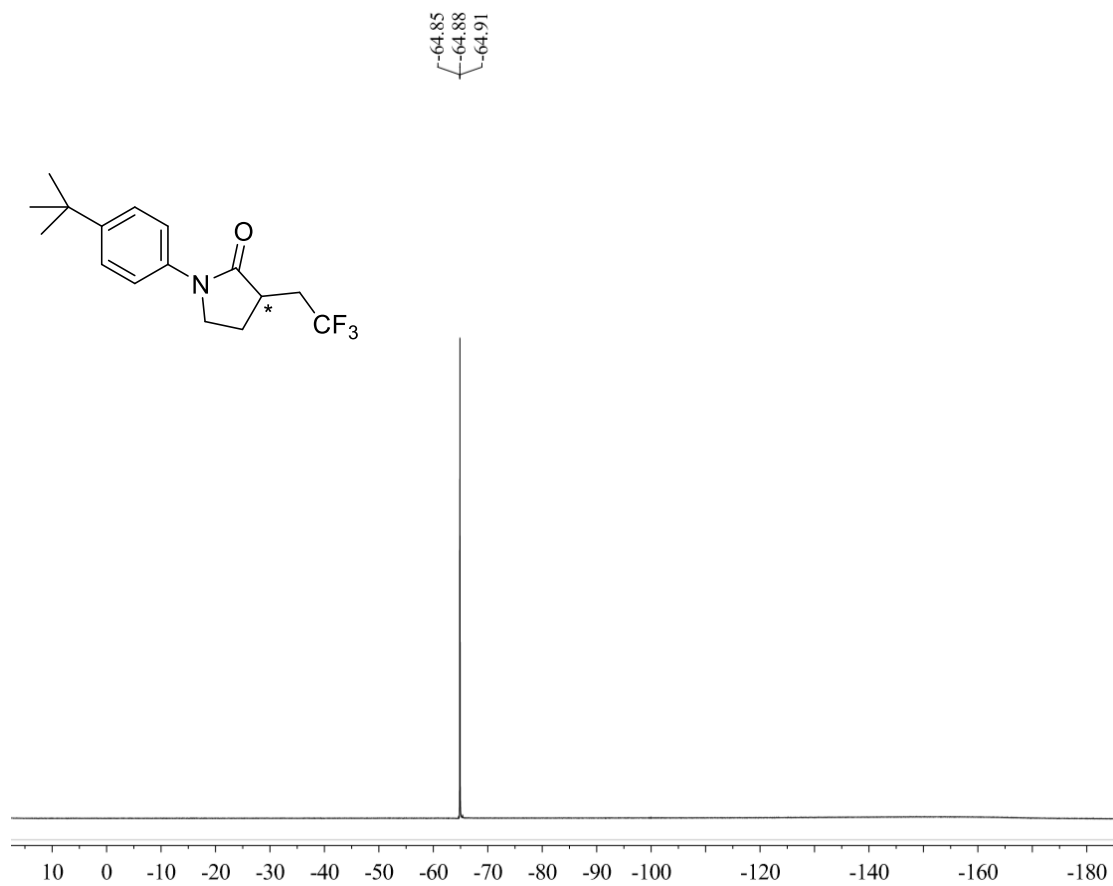

1-(3-nitrophenyl)-3-(2,2,2-trifluoroethyl)pyrrolidin-2-one (**2j**)

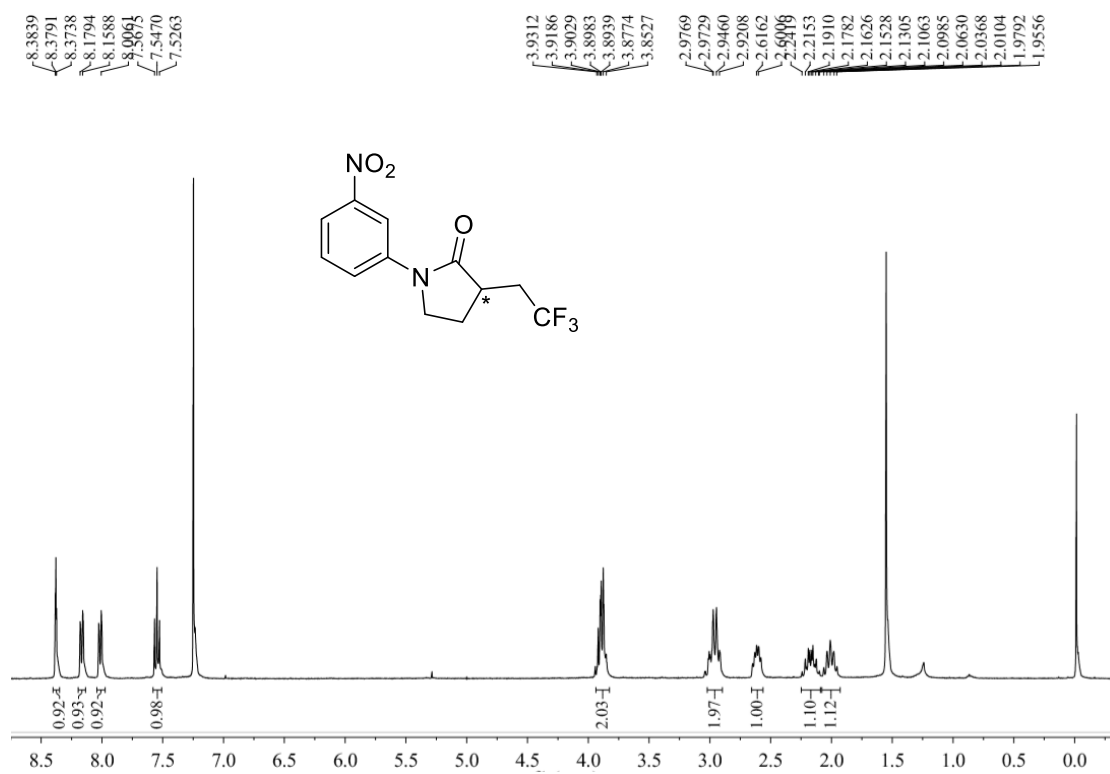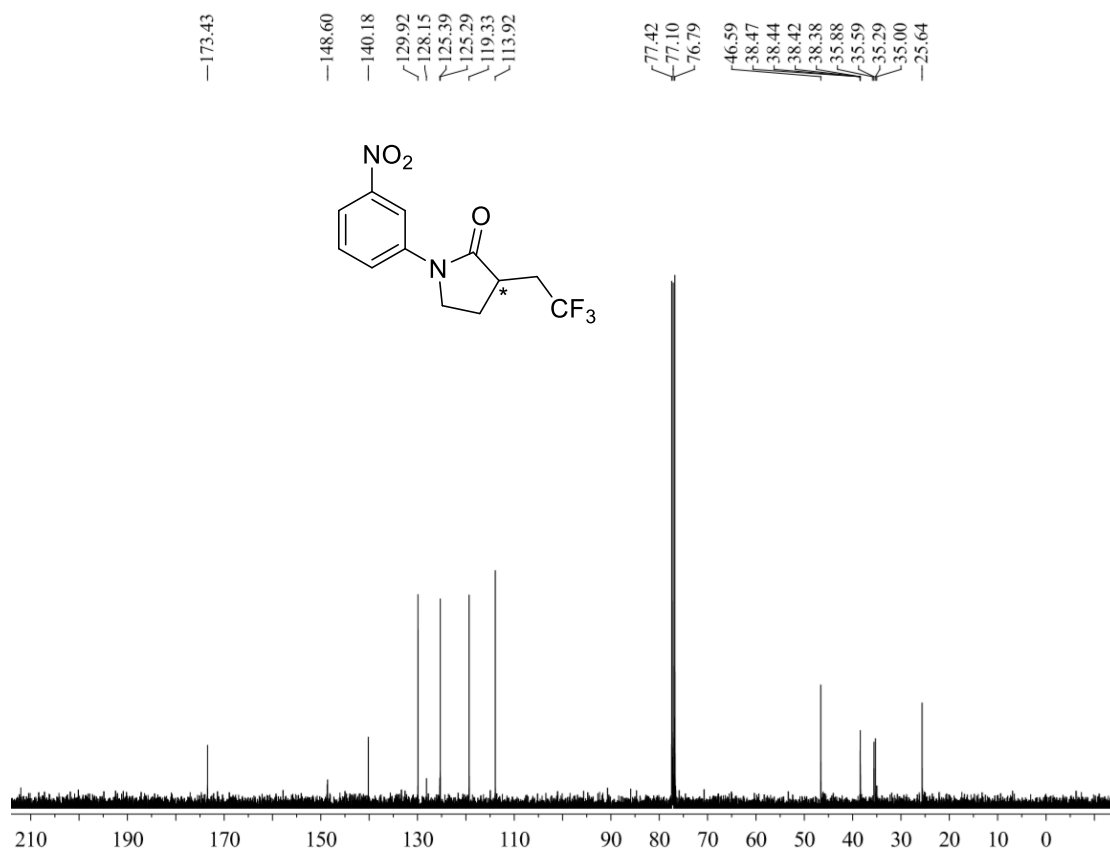

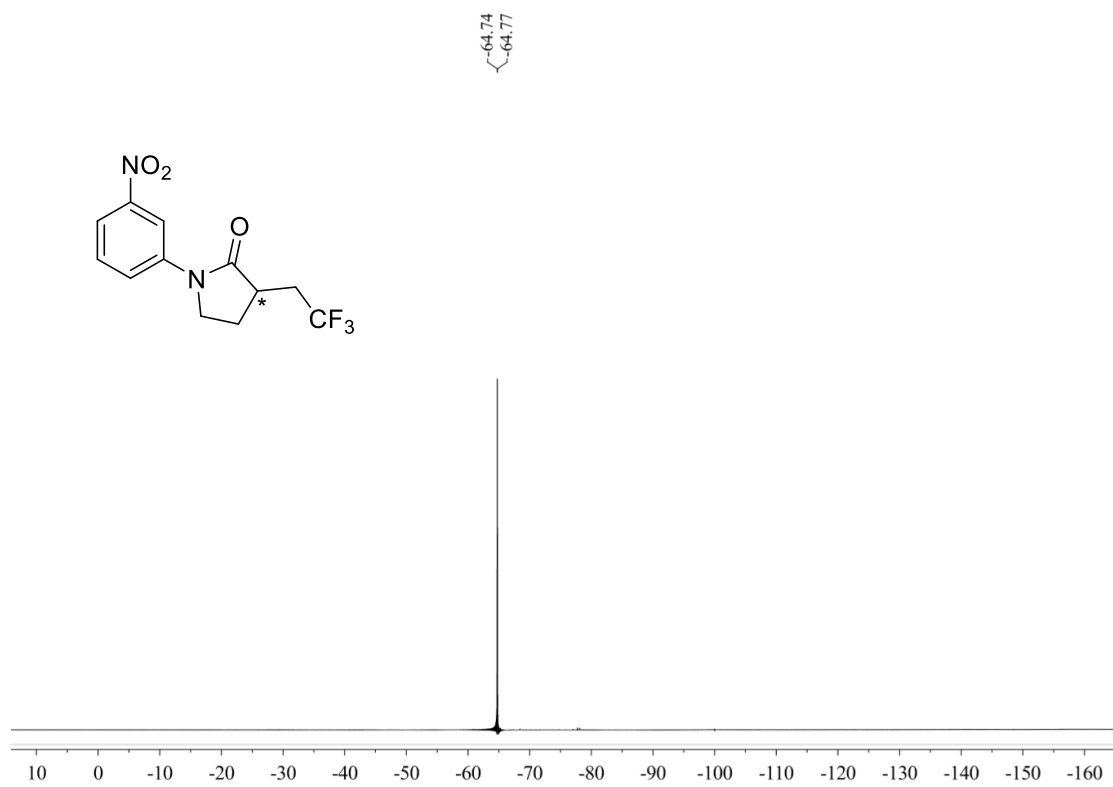



1-(3,5-dimethylphenyl)-3-(2,2,2-trifluoroethyl)pyrrolidin-2-one (**2k**)

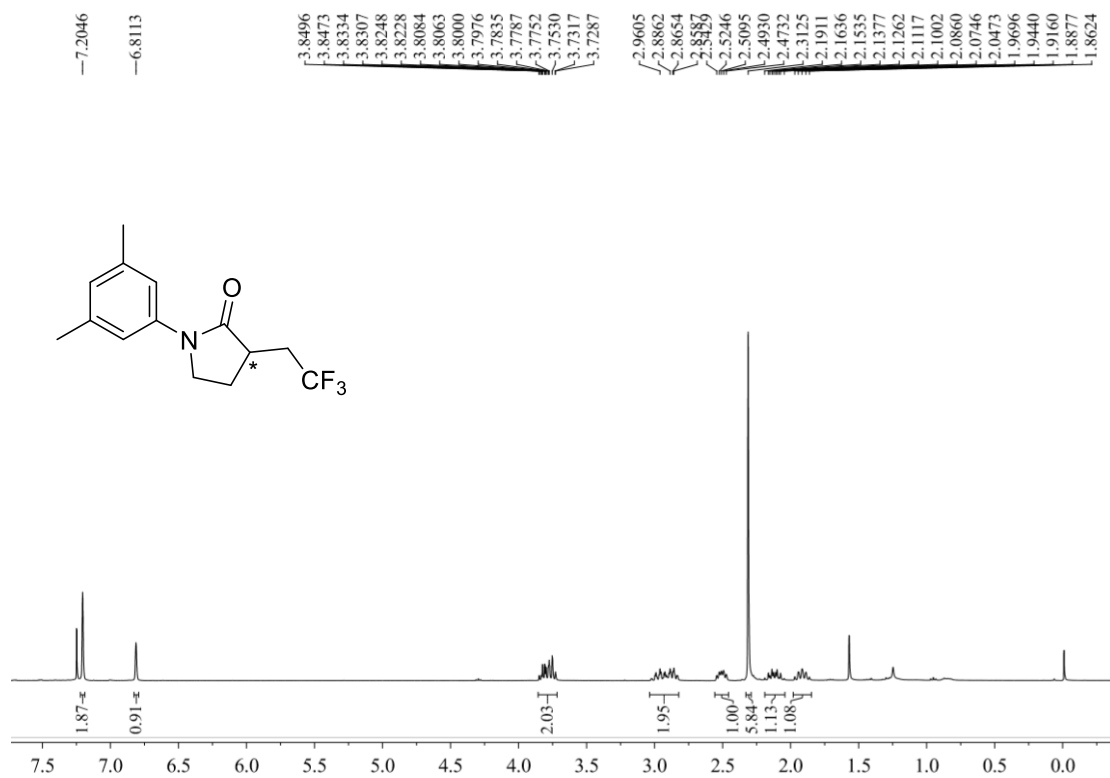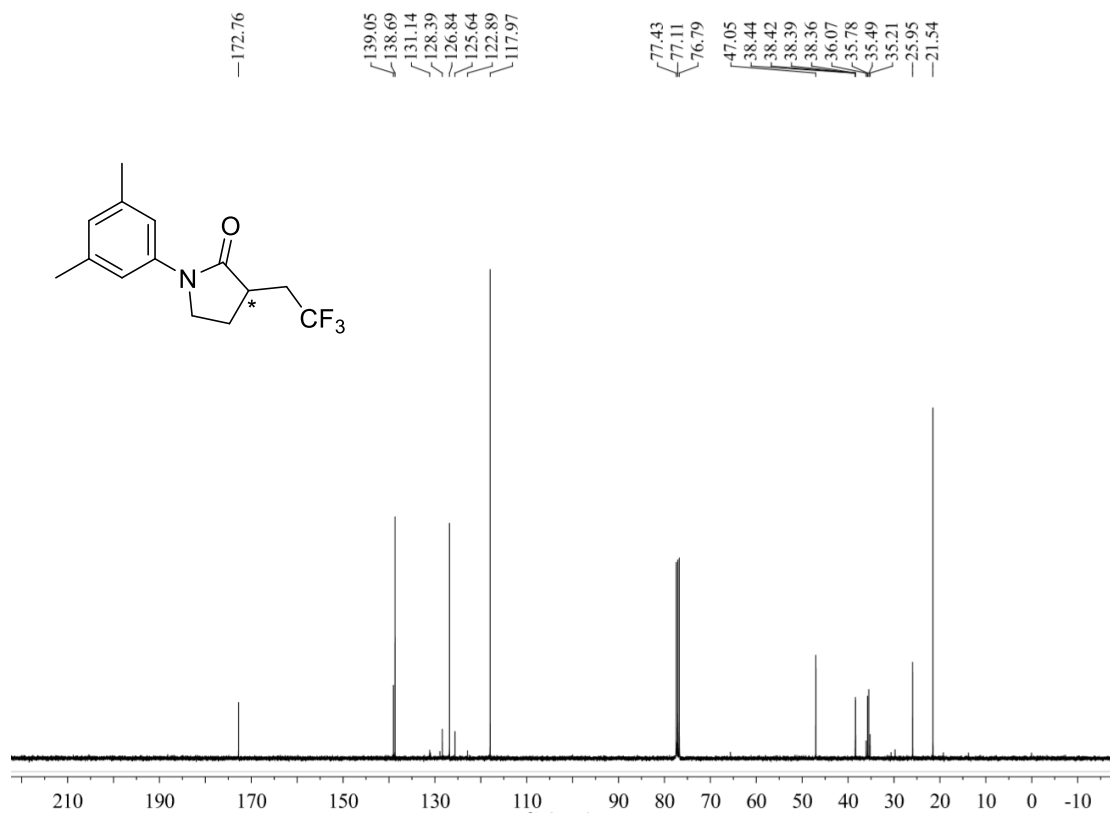

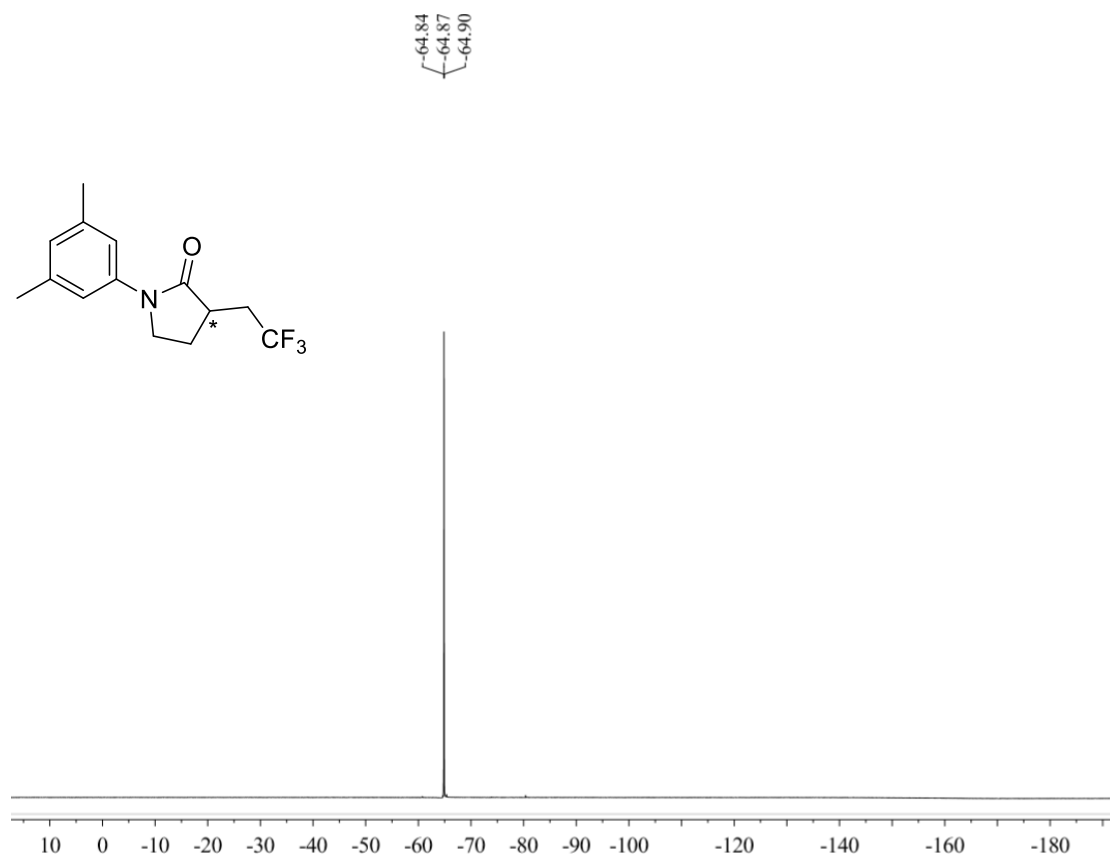

1-(3,4-dimethylphenyl)-3-(2,2,2-trifluoroethyl)pyrrolidin-2-one (**21**)

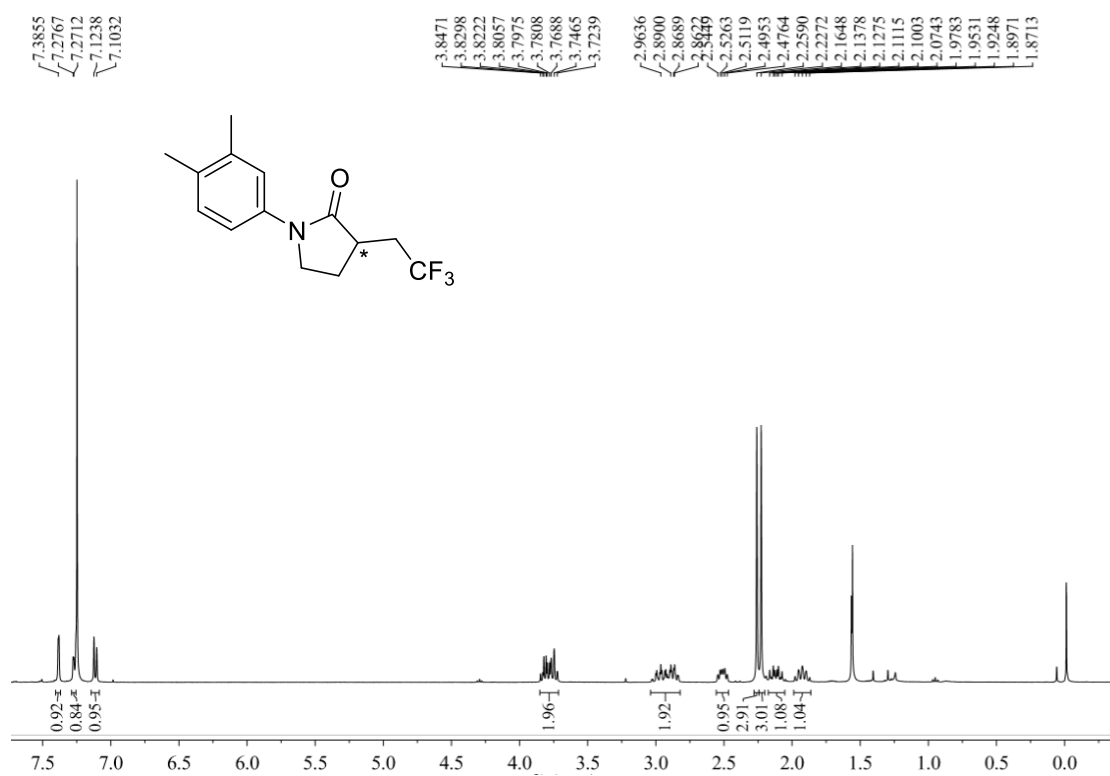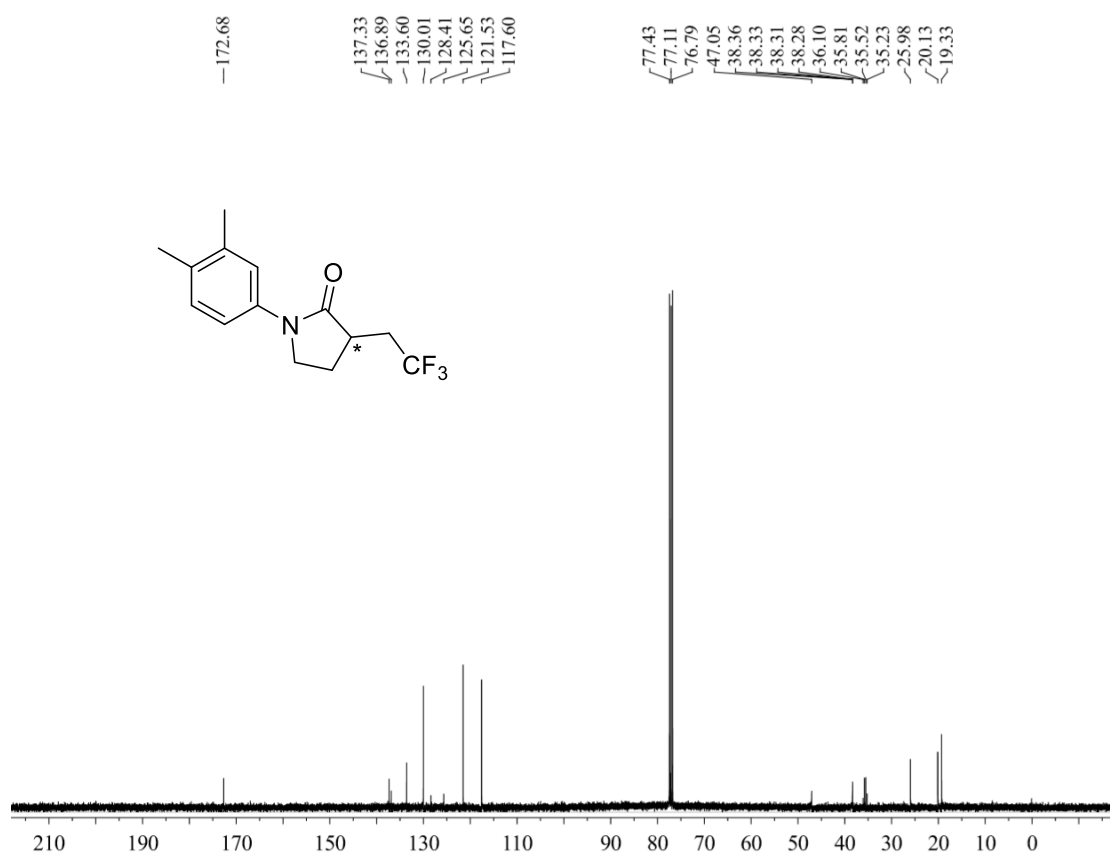

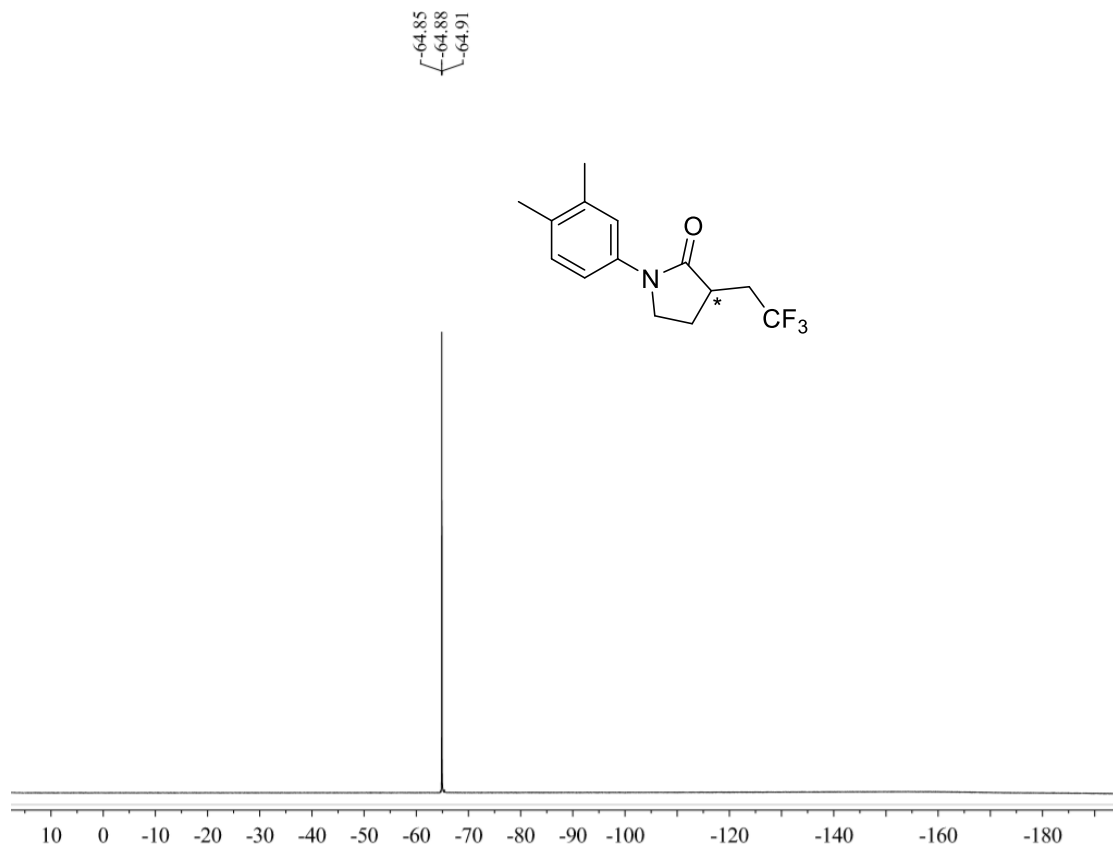

1-(3,5-dimethoxyphenyl)-3-(2,2,2-trifluoroethyl)pyrrolidin-2-one (**2m**)

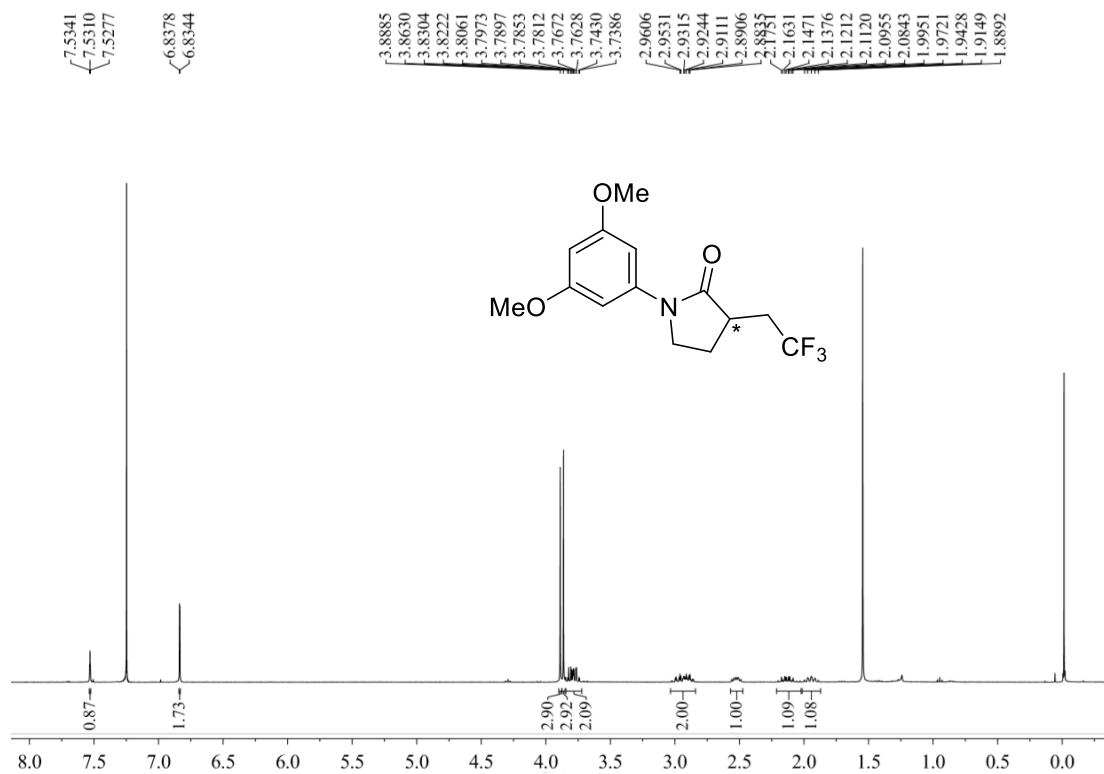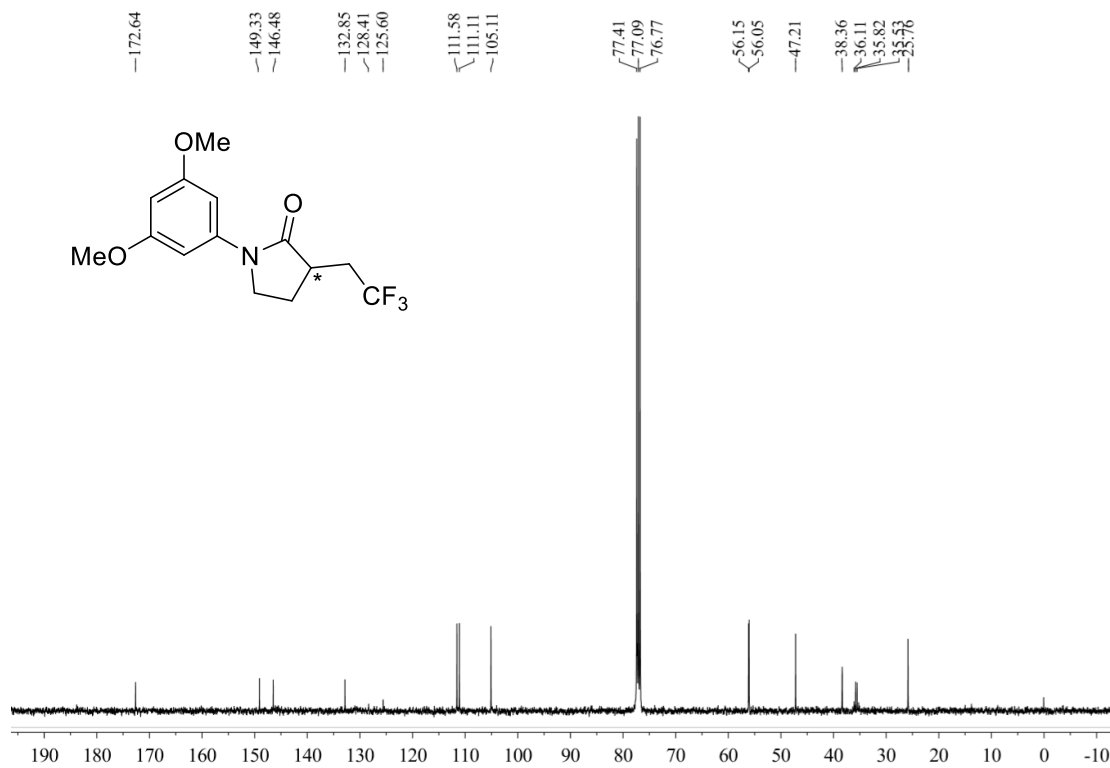

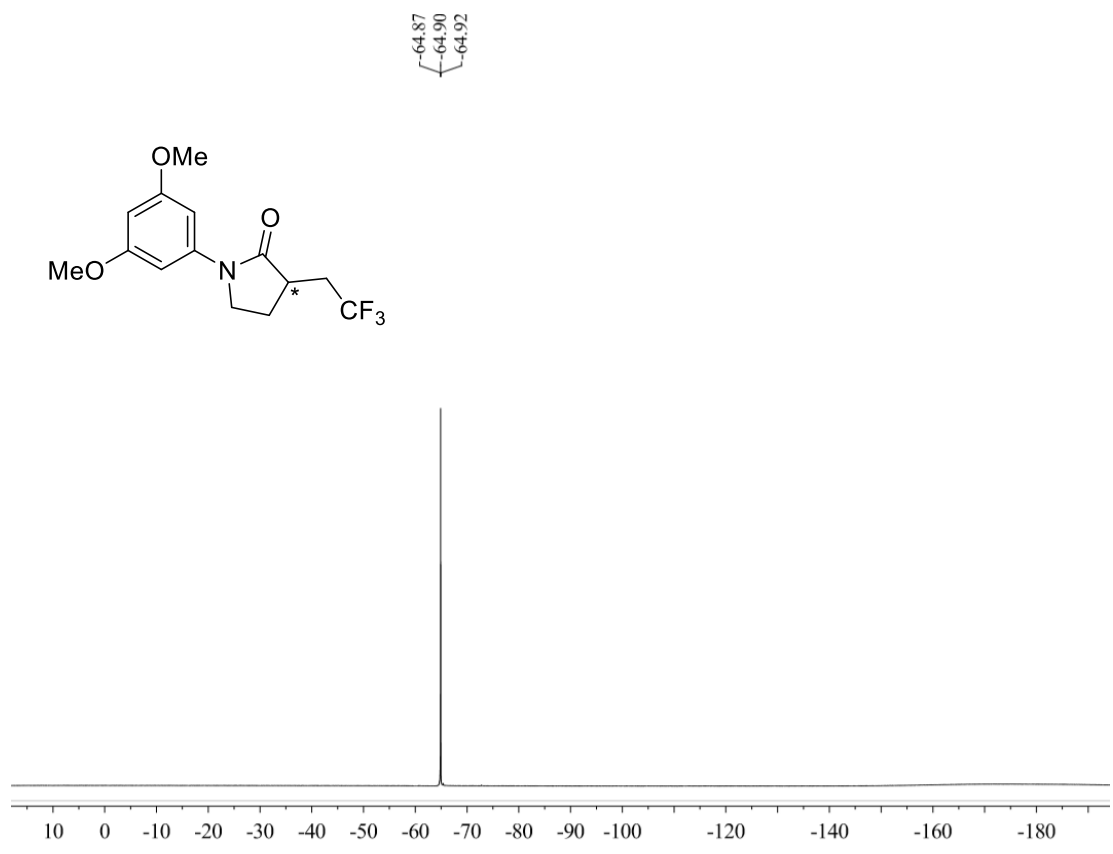

1-(3,5-dichlorophenyl)-3-(2,2,2-trifluoroethyl)pyrrolidin-2-one (**2n**)

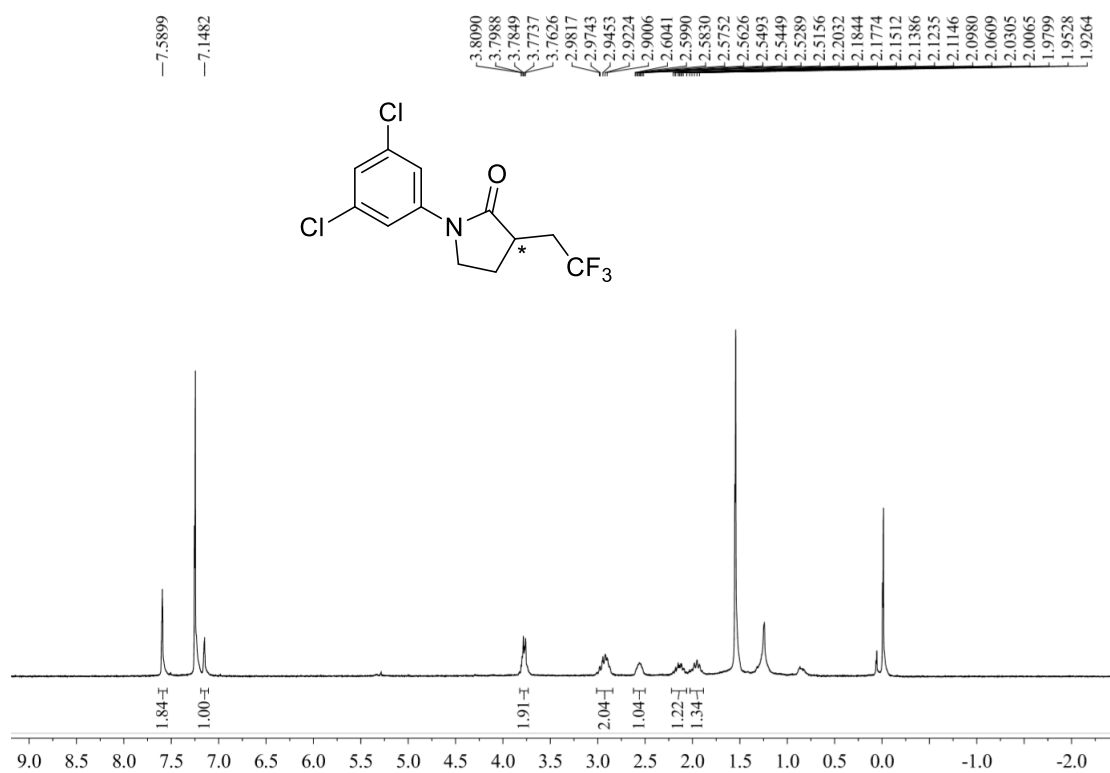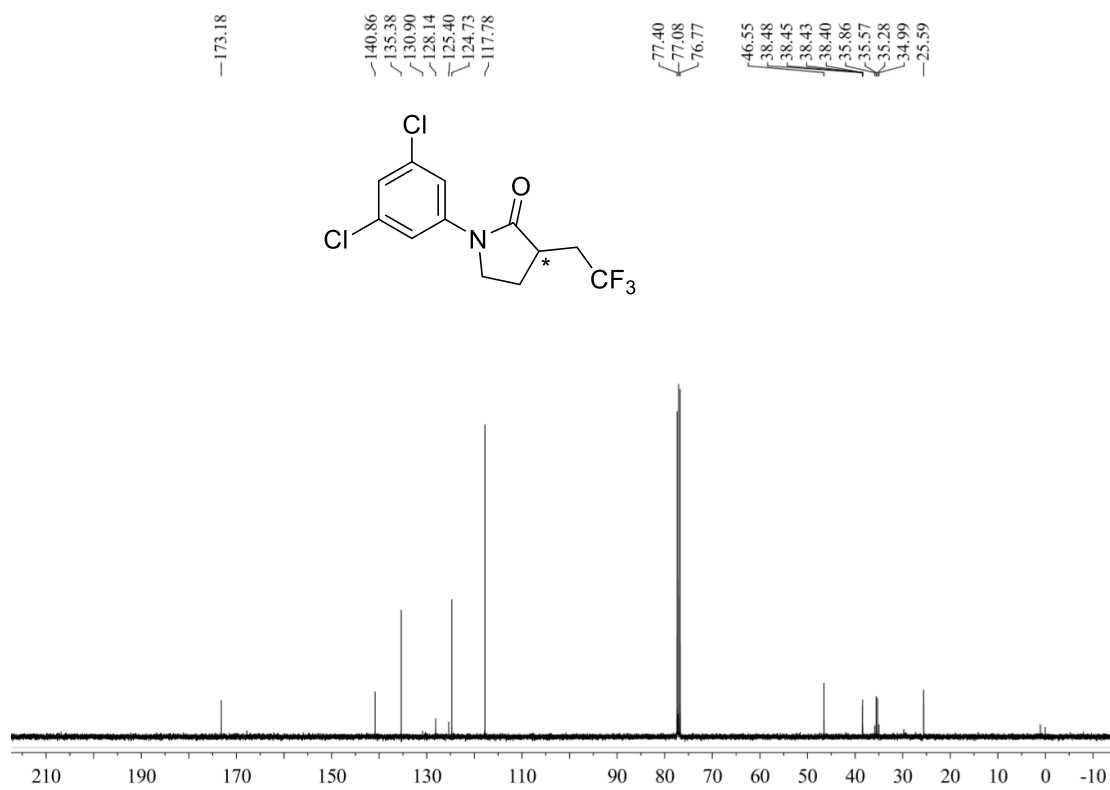

-64.69  
-64.72  
-64.75  
-64.77  
-64.88

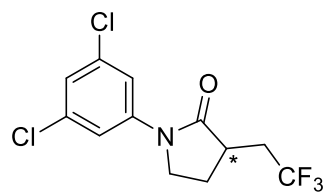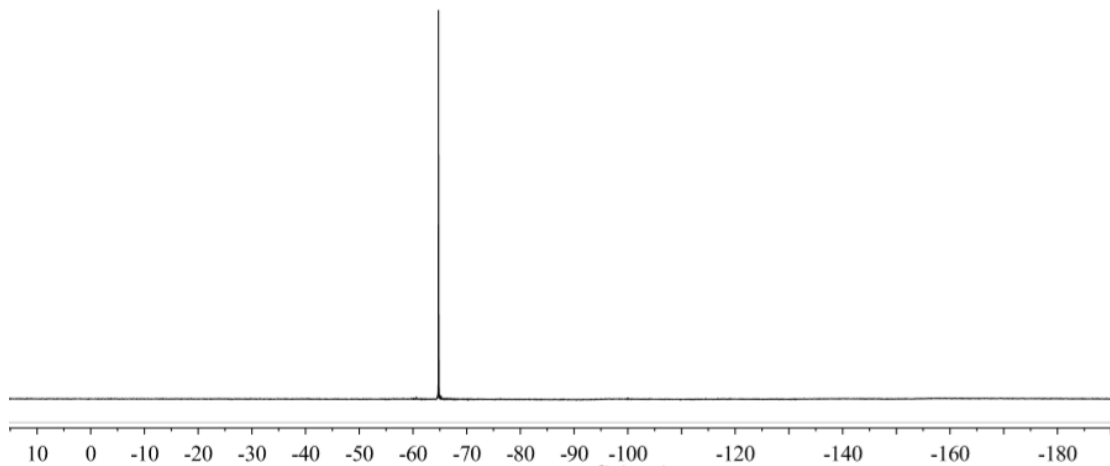



1-(3,4-dichlorophenyl)-3-(2,2,2-trifluoroethyl)pyrrolidin-2-one (**2o**)

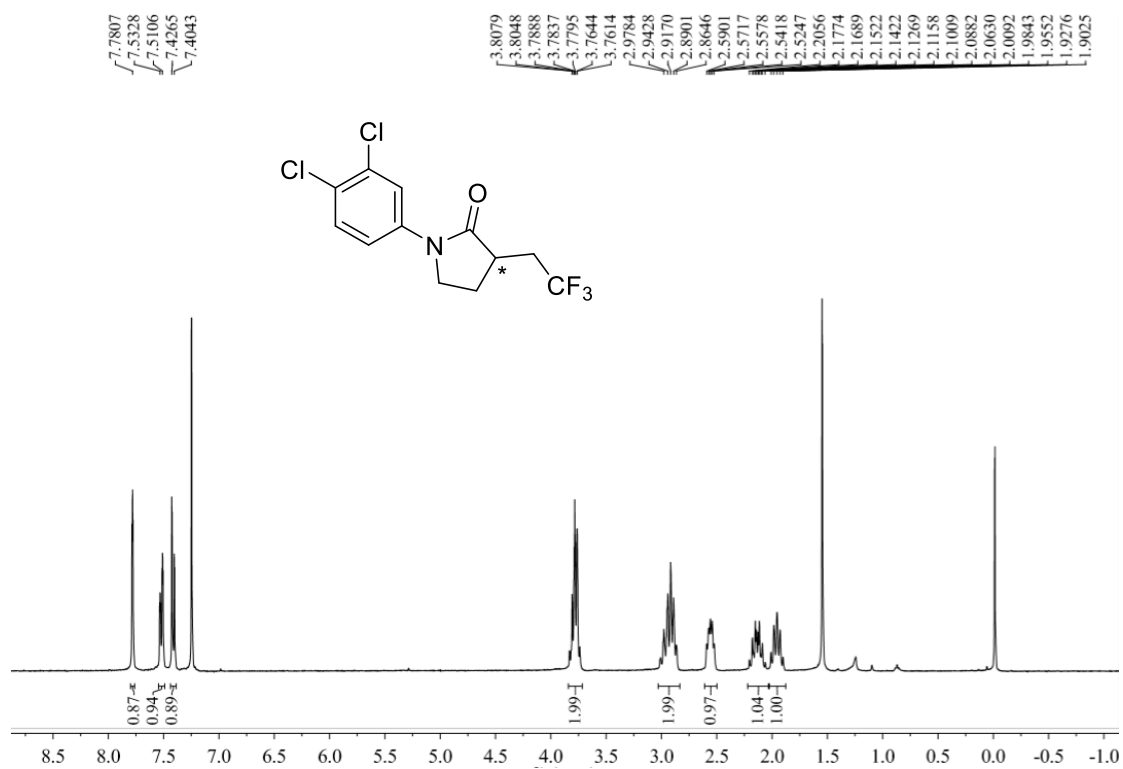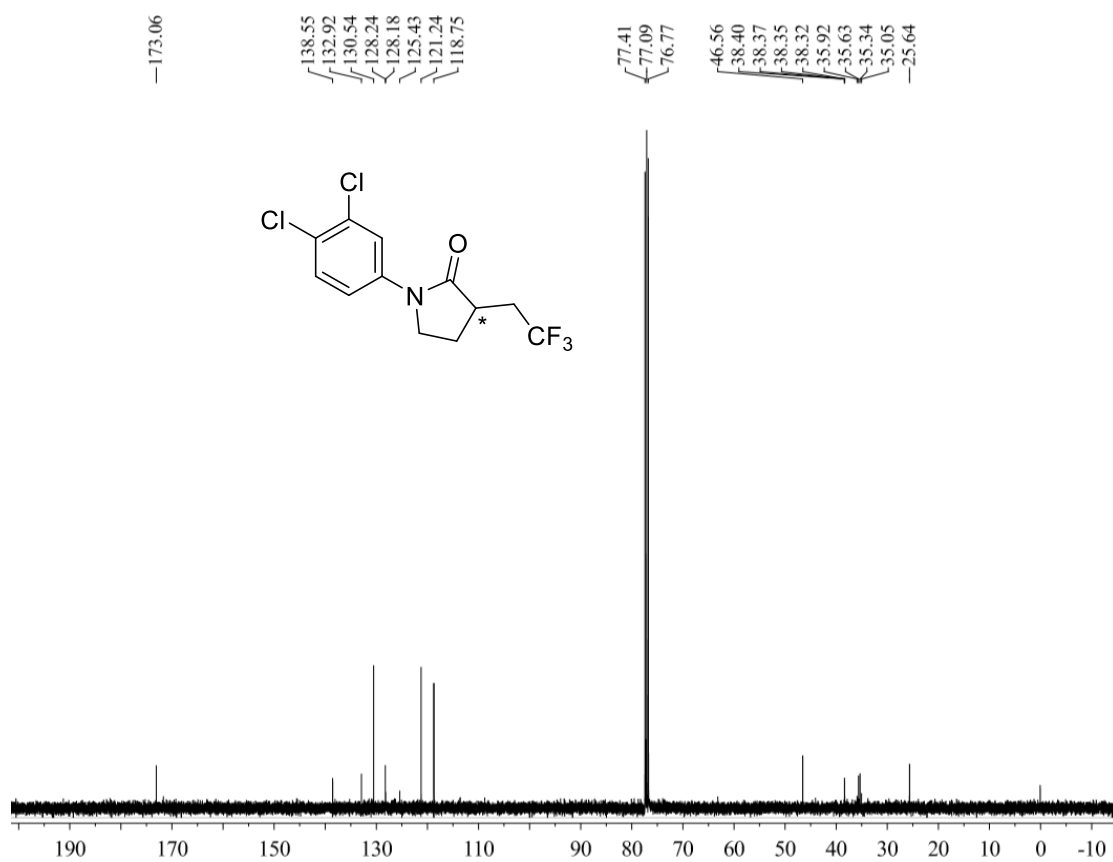

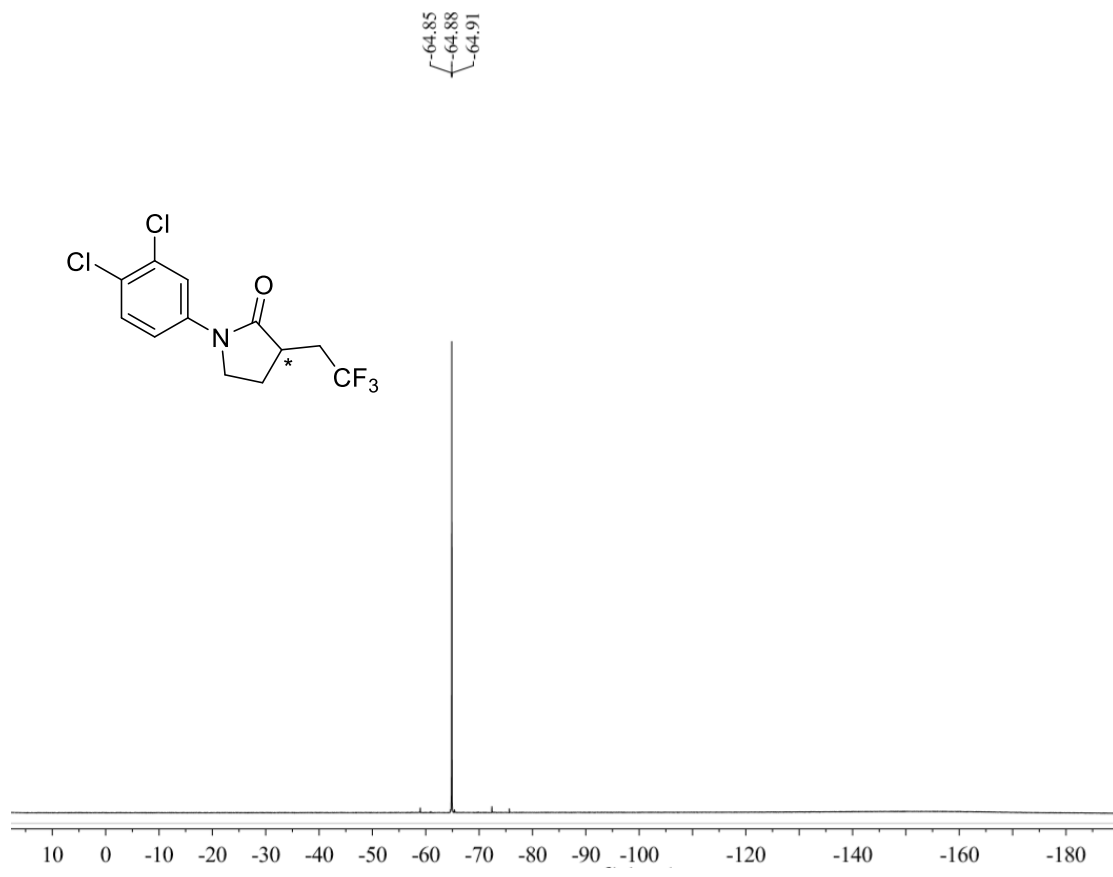

1-(naphthalen-1-yl)-3-(2,2,2-trifluoroethyl)pyrrolidin-2-one (**2p**)

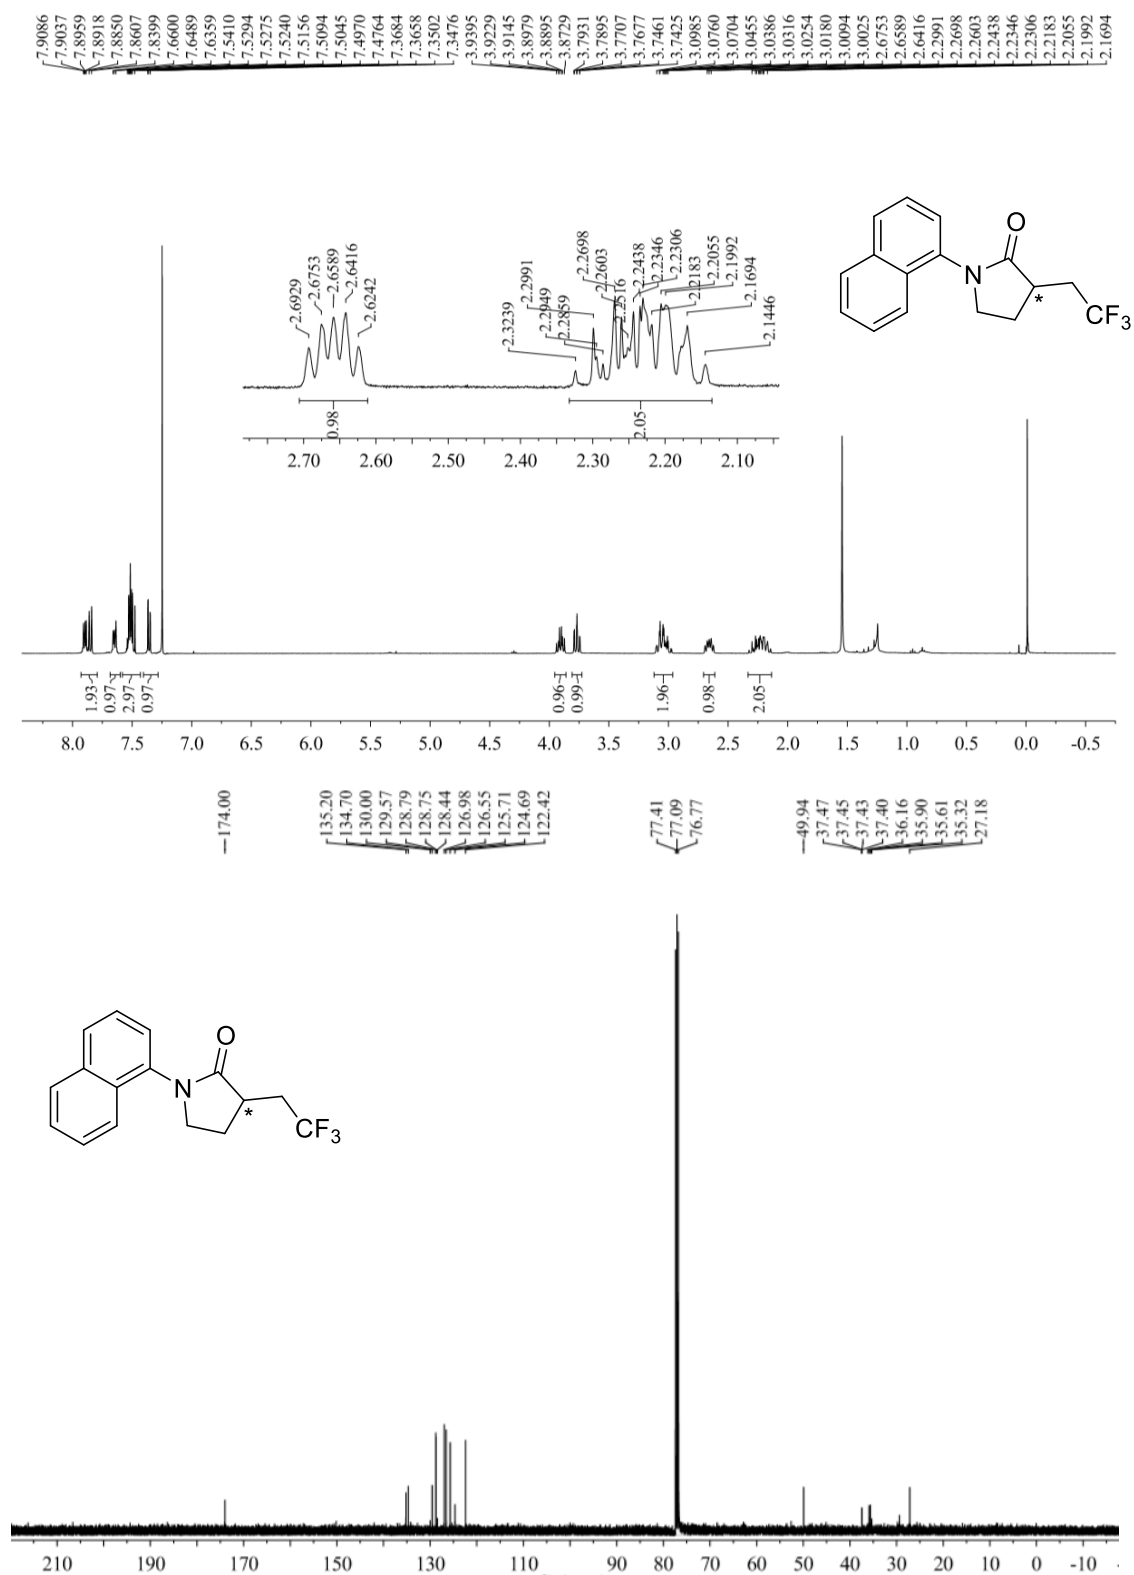

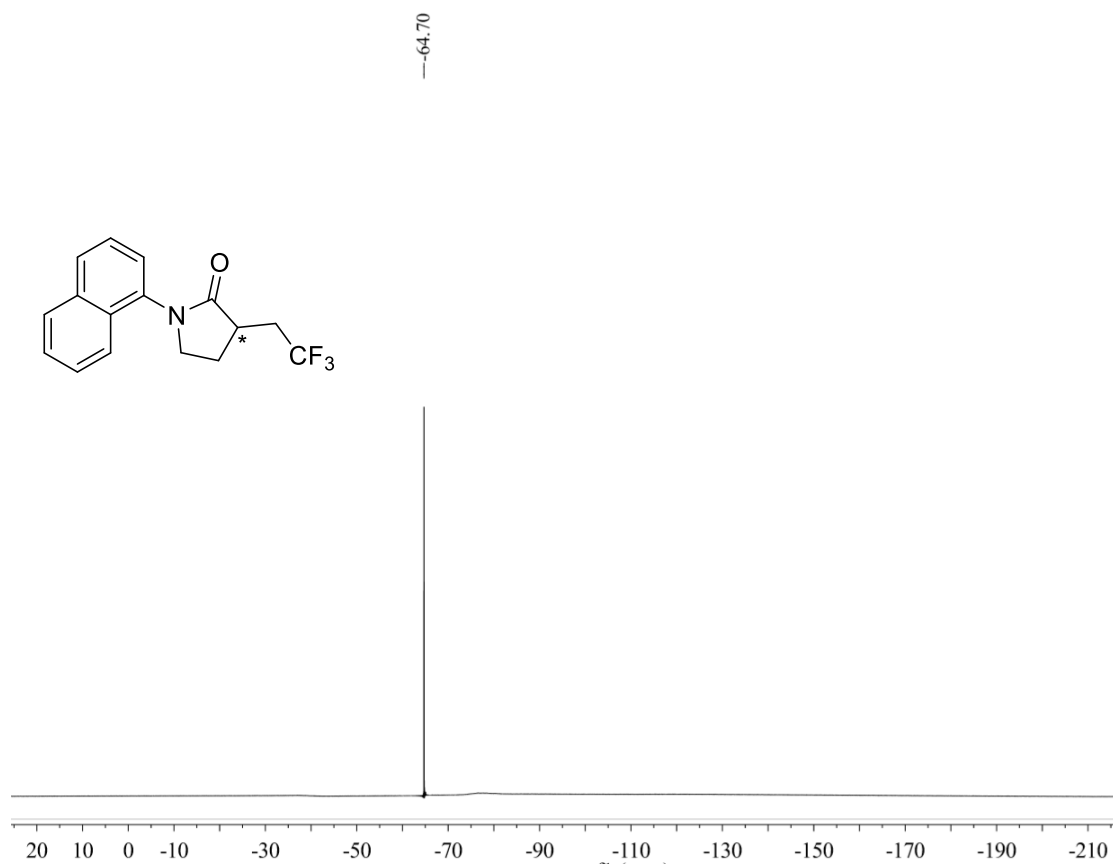

# 1-methyl-3-(2,2,2-trifluoroethyl)pyrrolidin-2-one (**2q**)

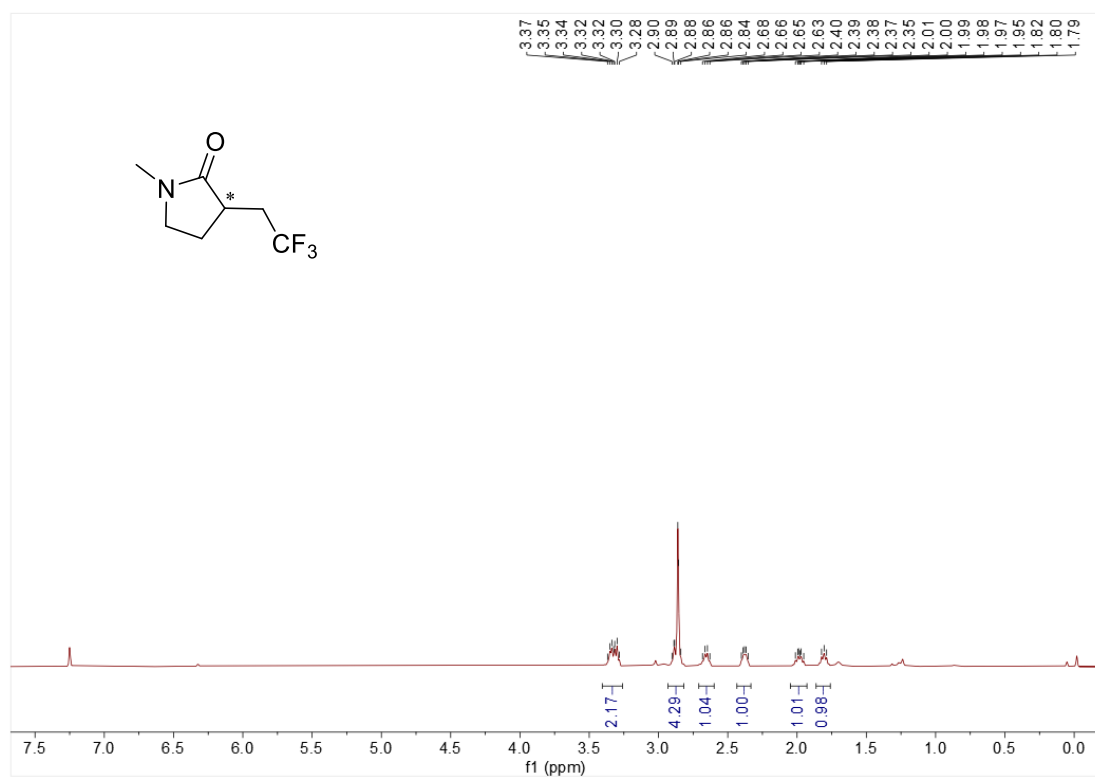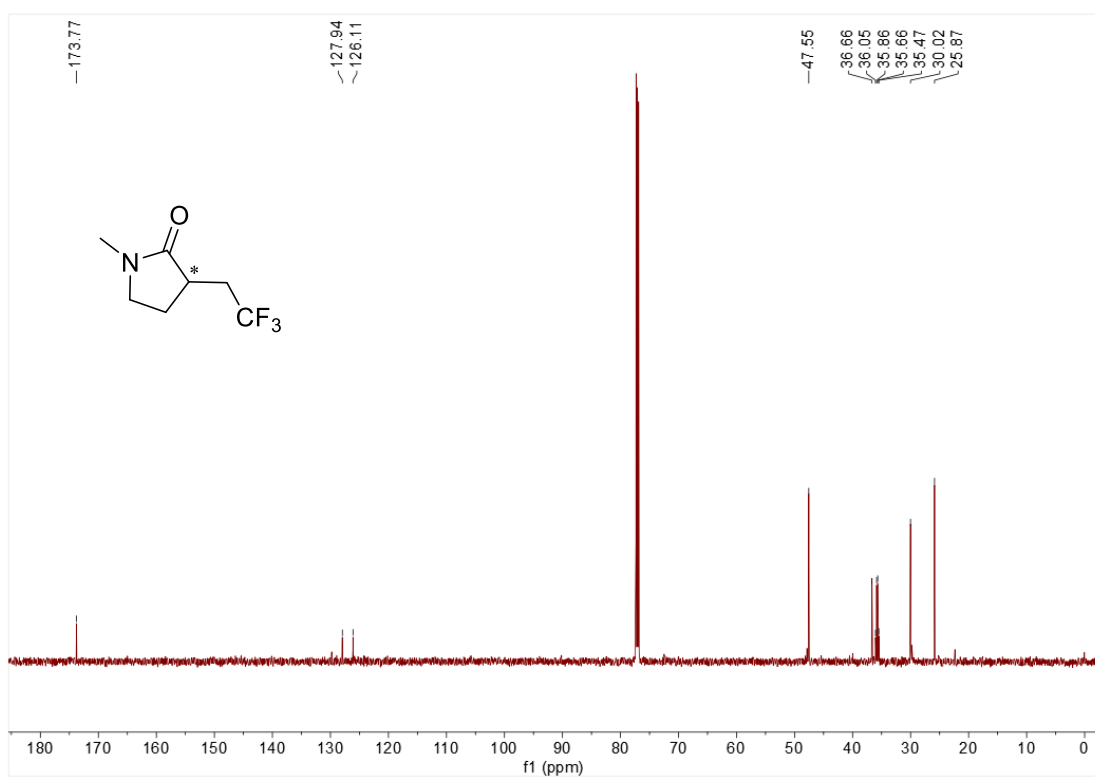

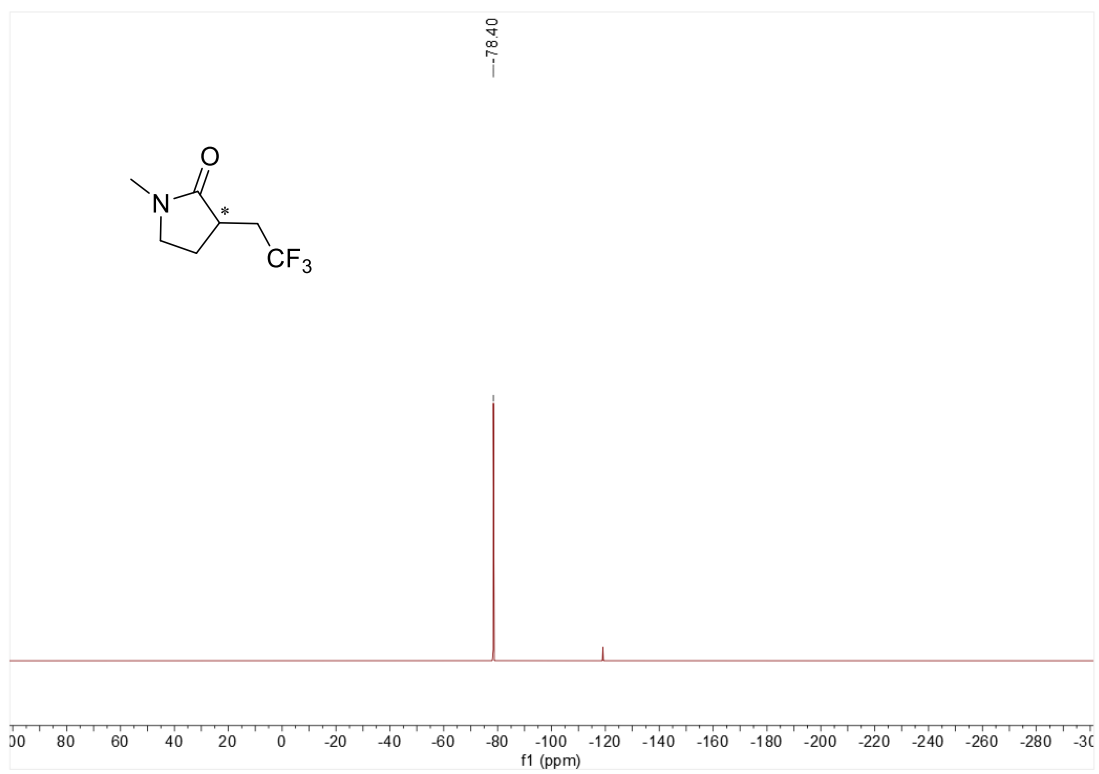

1-benzyl-3-(2,2,2-trifluoroethyl)pyrrolidin-2-one (**2r**)

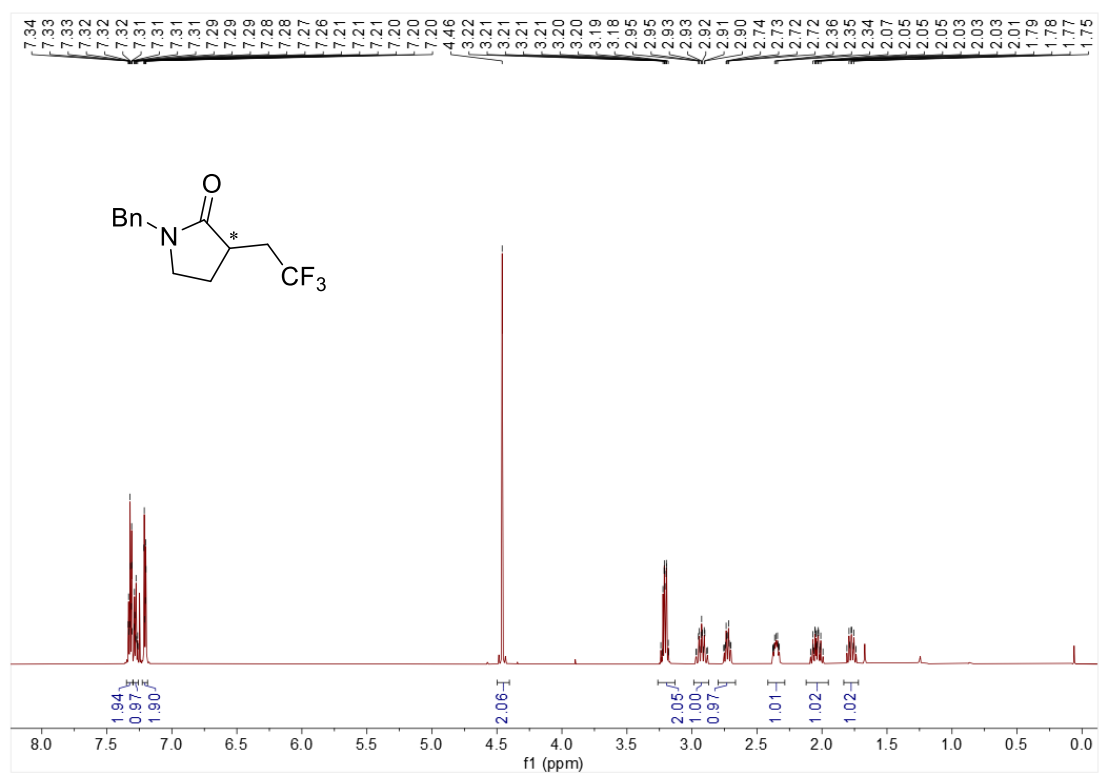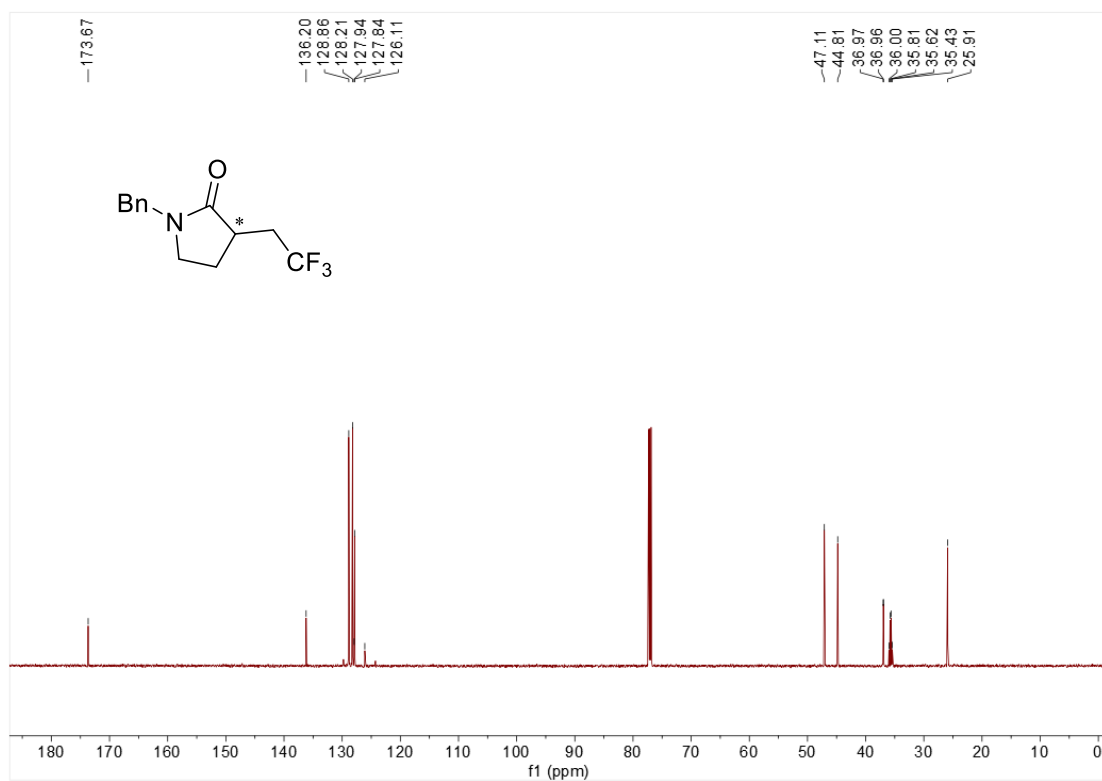

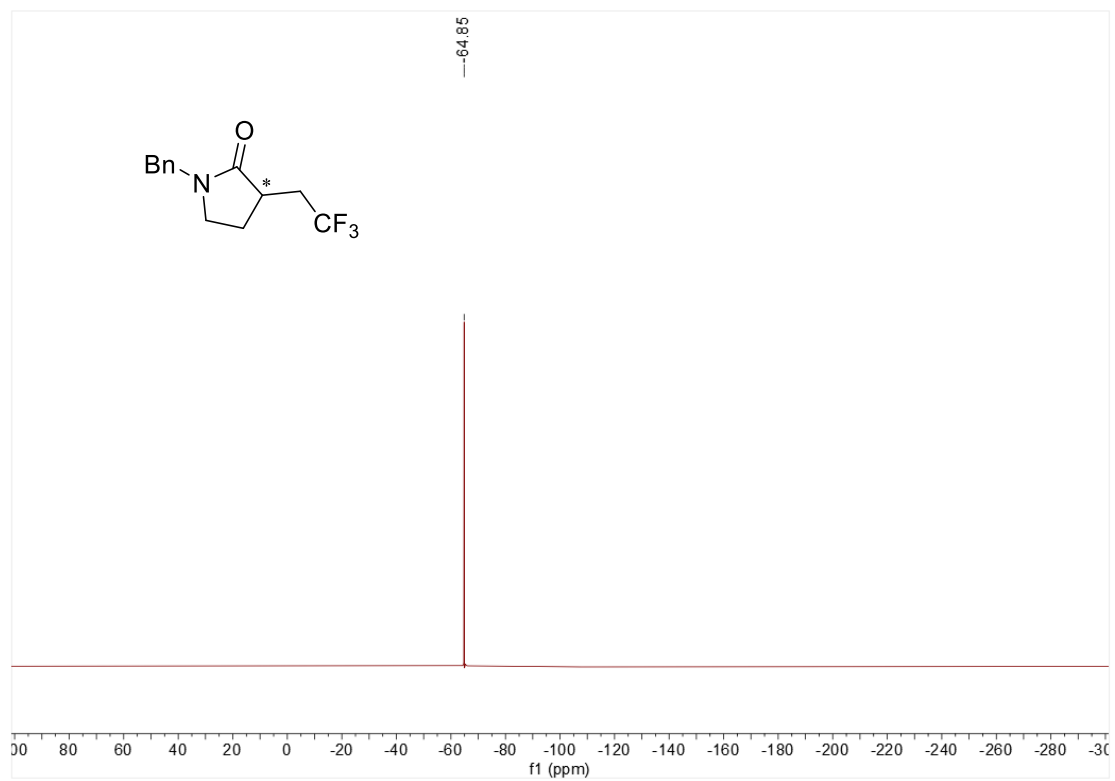



*tert*-butyl-2-oxo-3-(2,2,2-trifluoroethyl)pyrrolidine-1-carboxylate (**2s**)

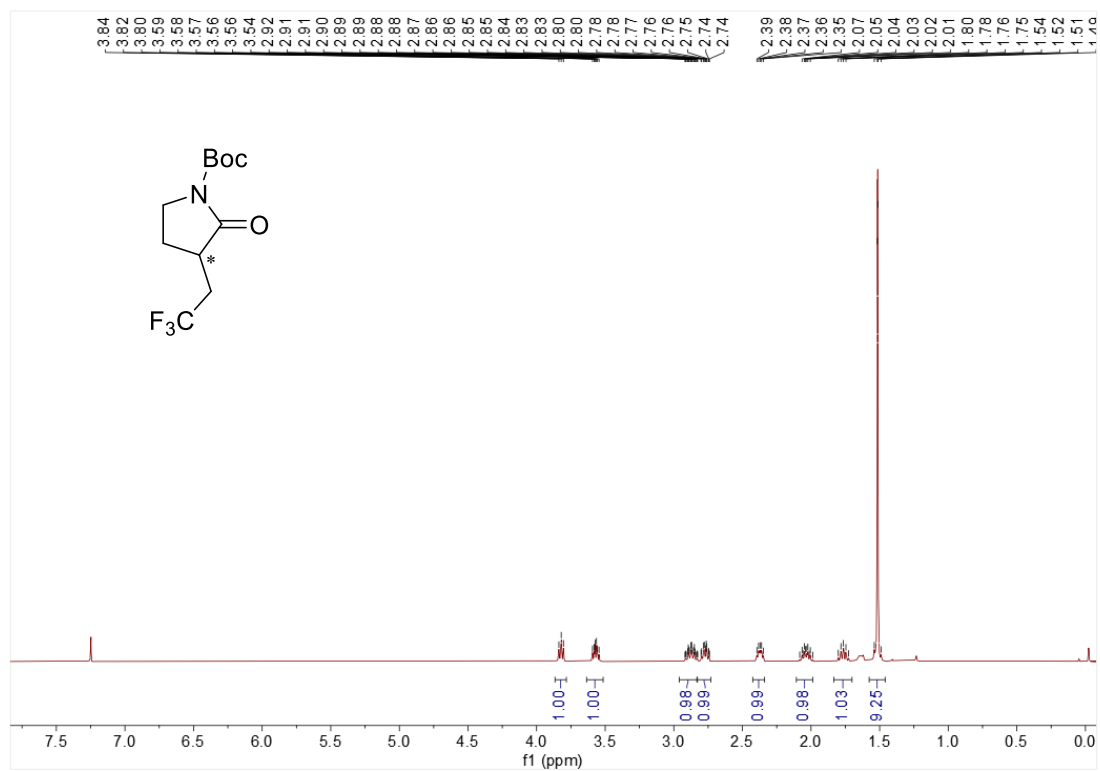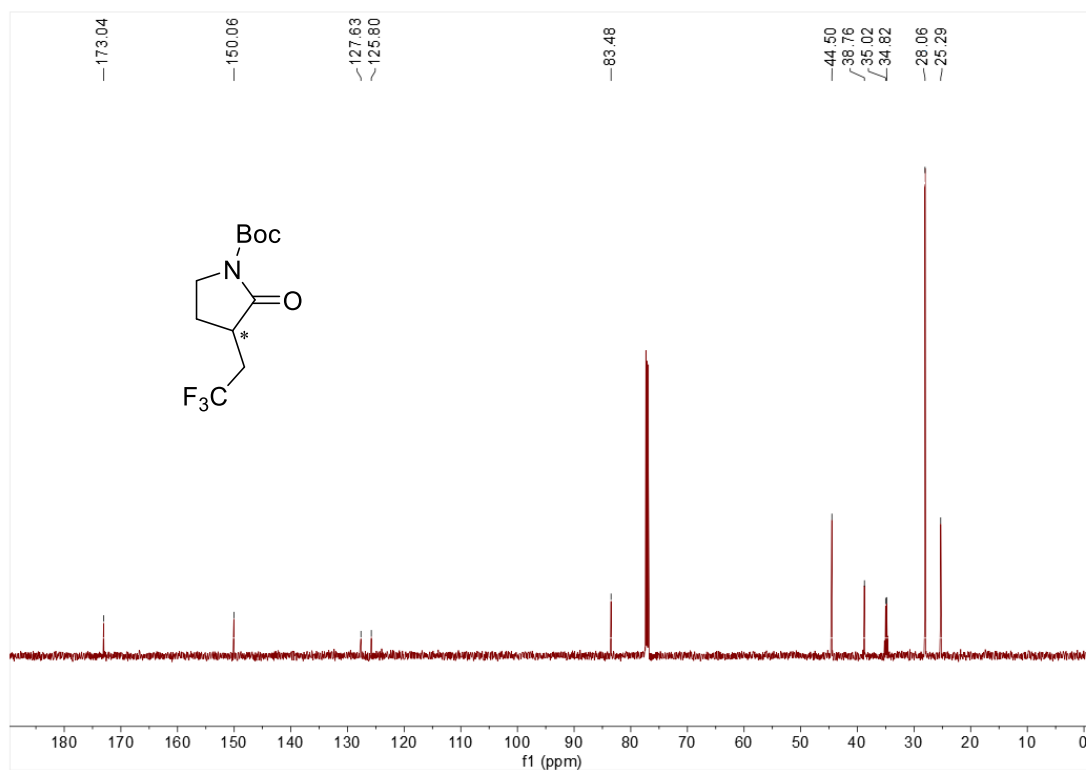

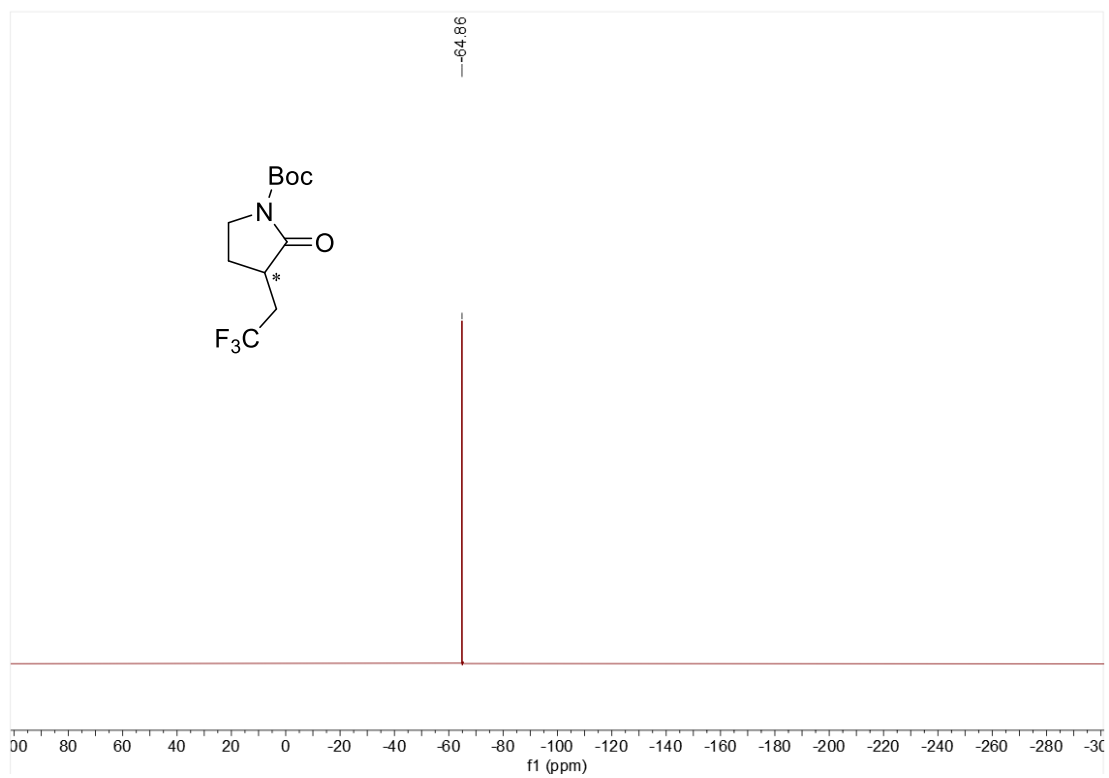

3-(2,2,2-trifluoroethyl)pyrrolidin-2-one (**2t**)

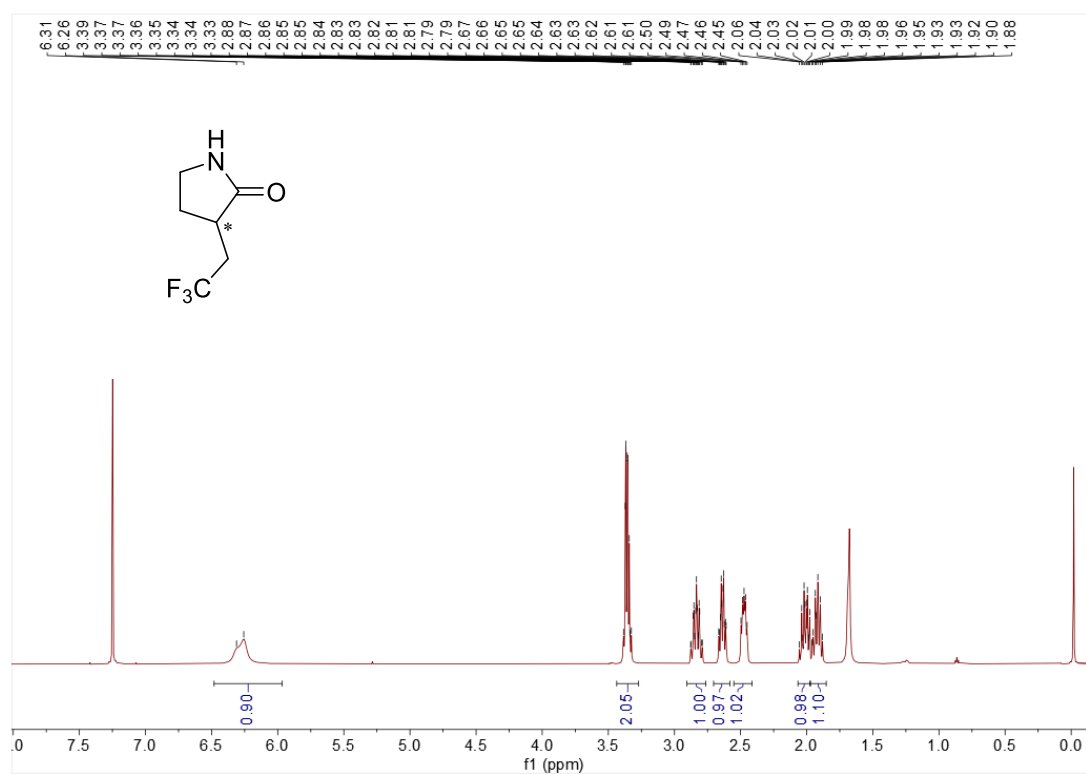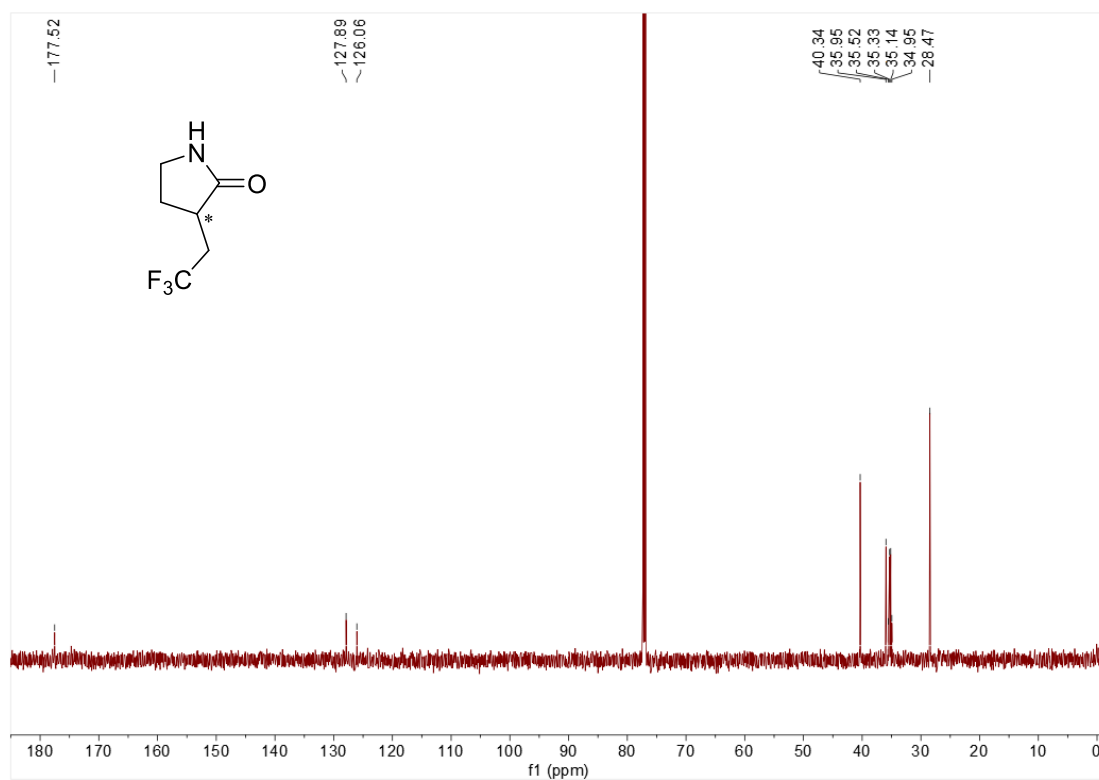

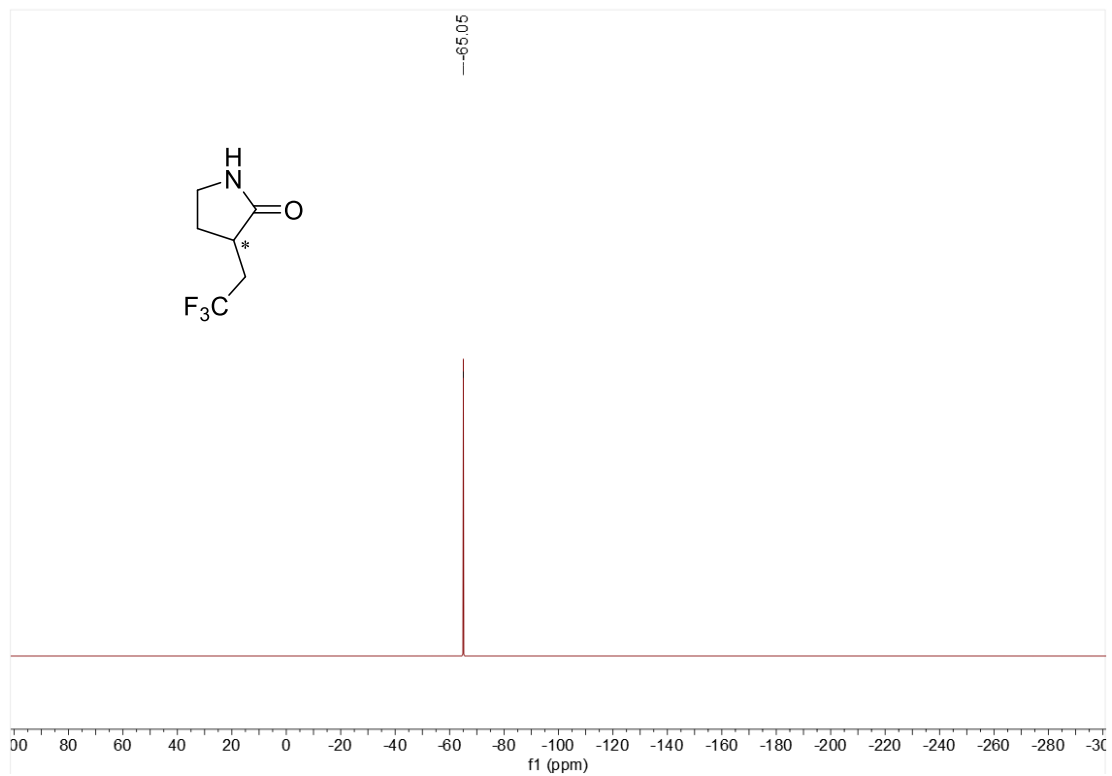

1-phenyl-3-(2,2,2-trifluoroethyl)piperidin-2-one (**4a**)

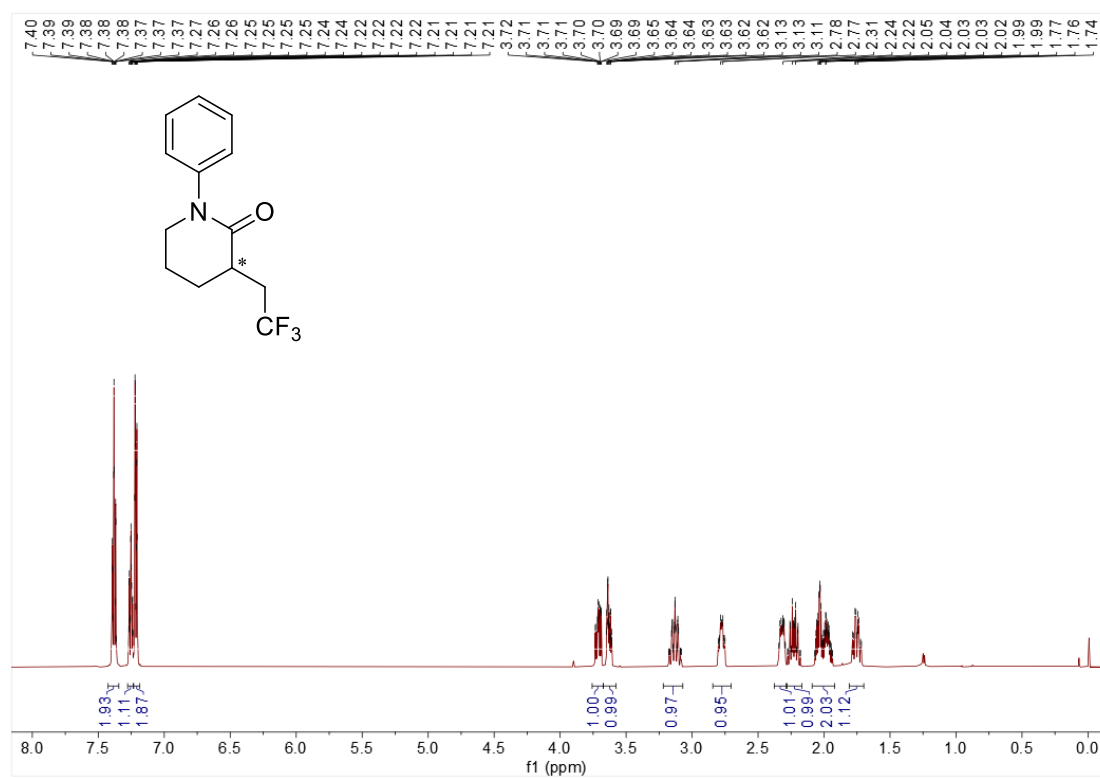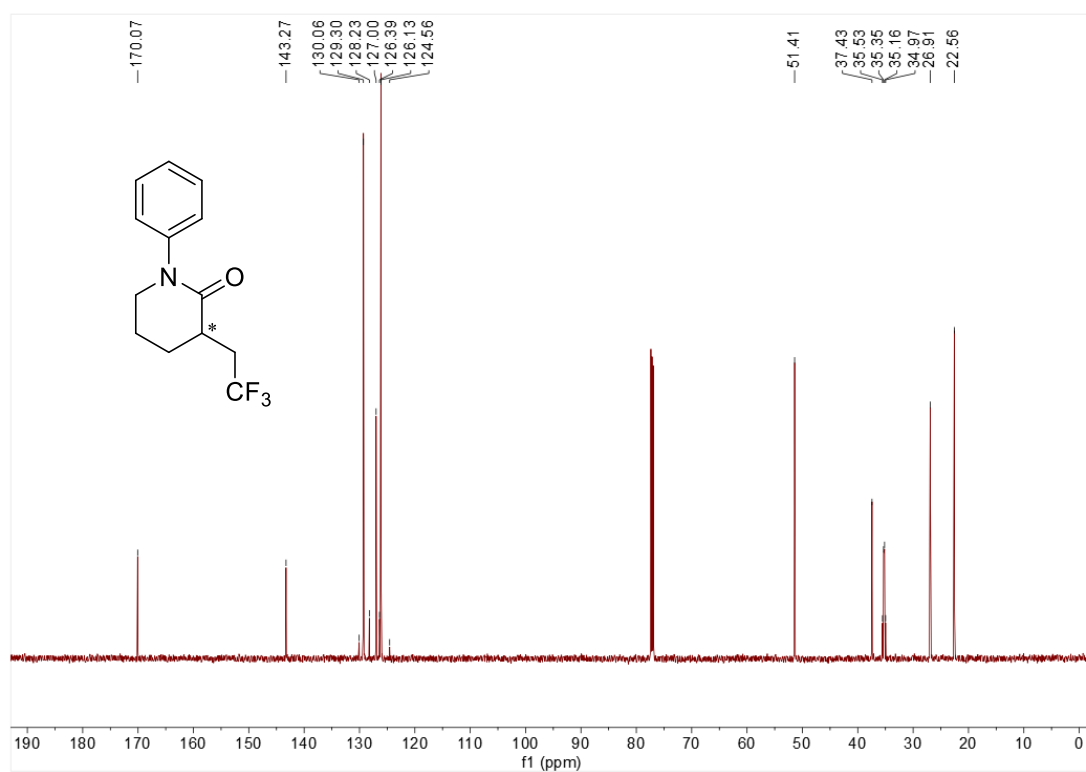

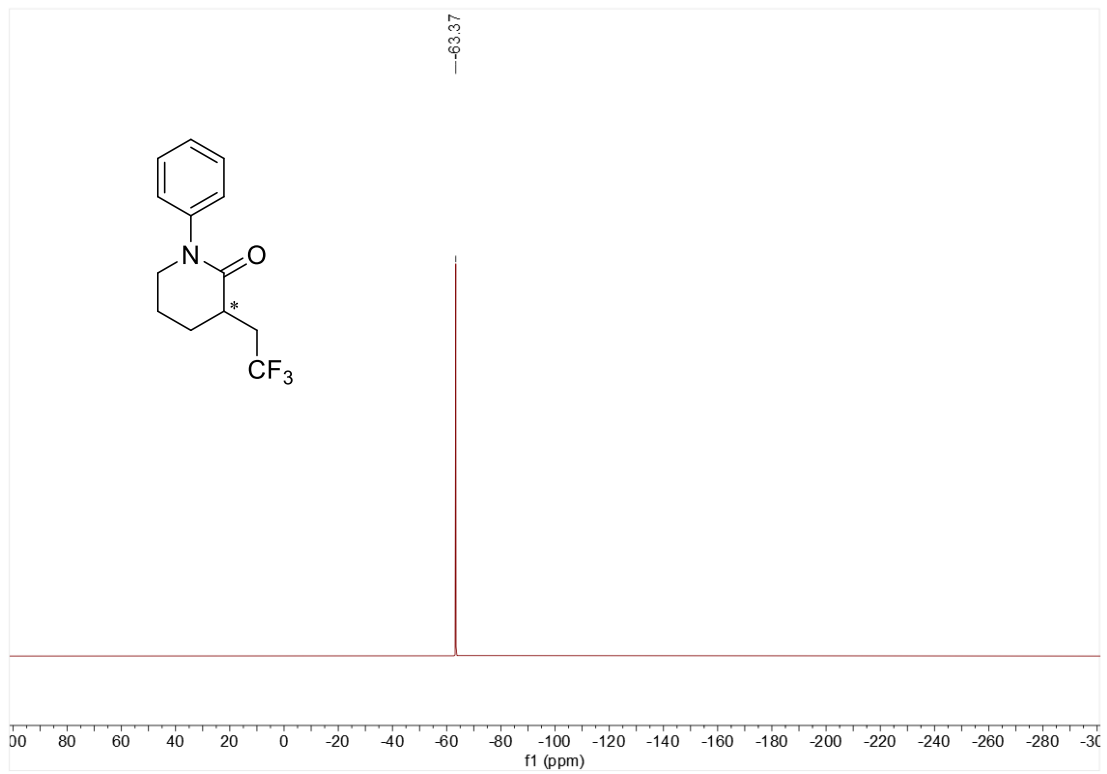

1-(*o*-tolyl)-3-(2,2,2-trifluoroethyl)piperidin-2-one (**4b**)

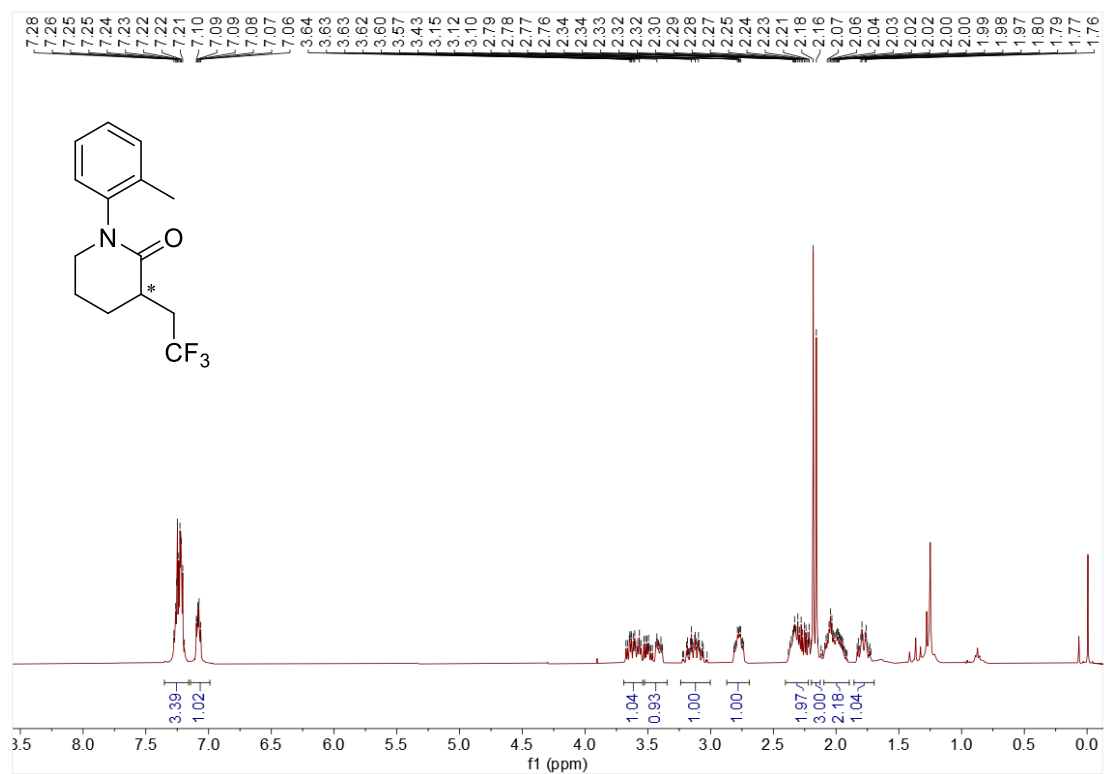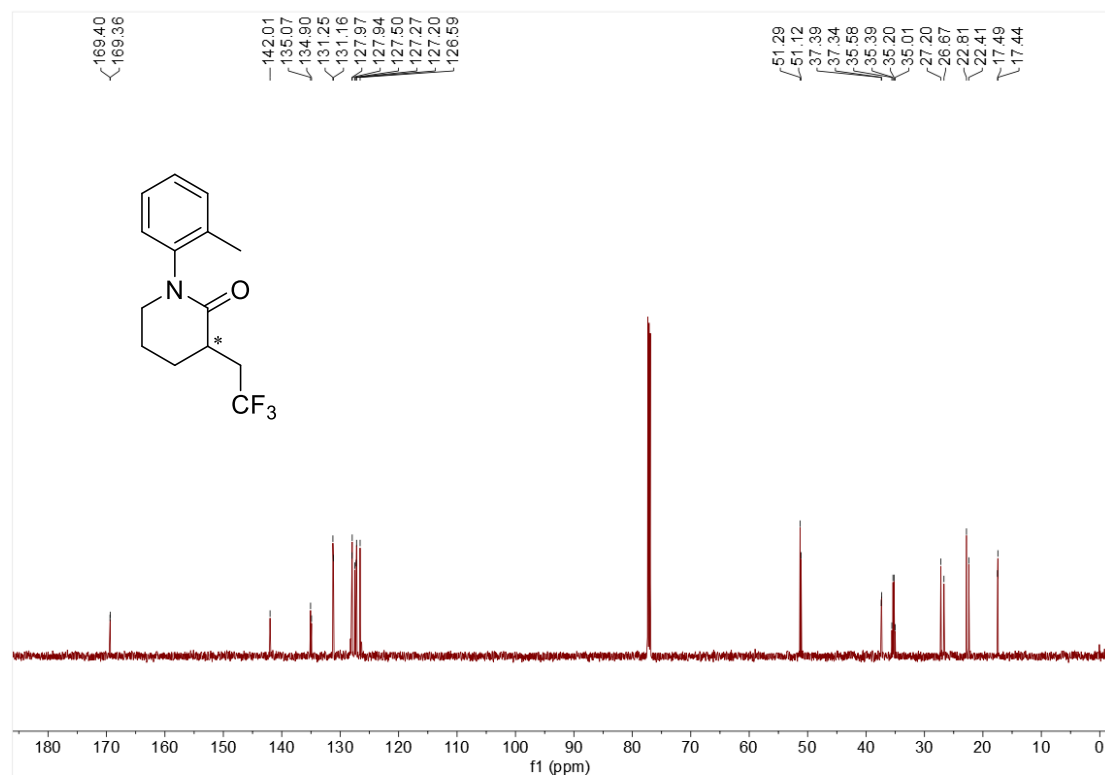

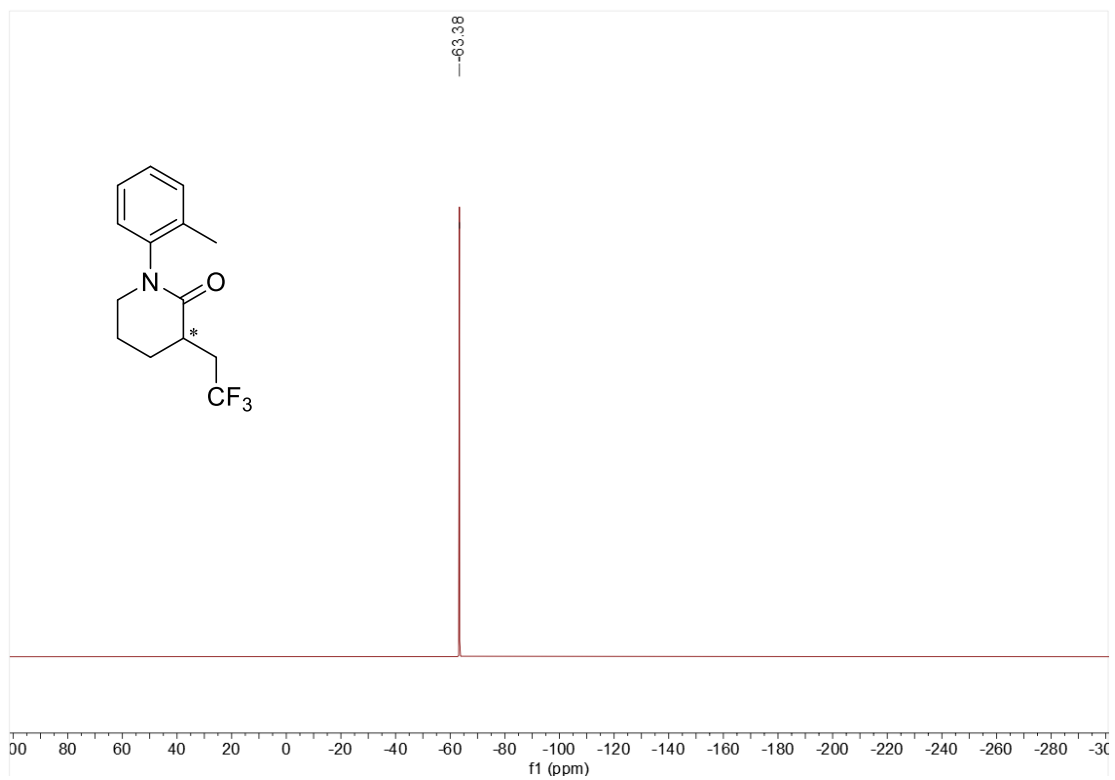



(S)-1-(*m*-tolyl)-3-(2,2,2-trifluoroethyl)piperidin-2-one (**4c**)

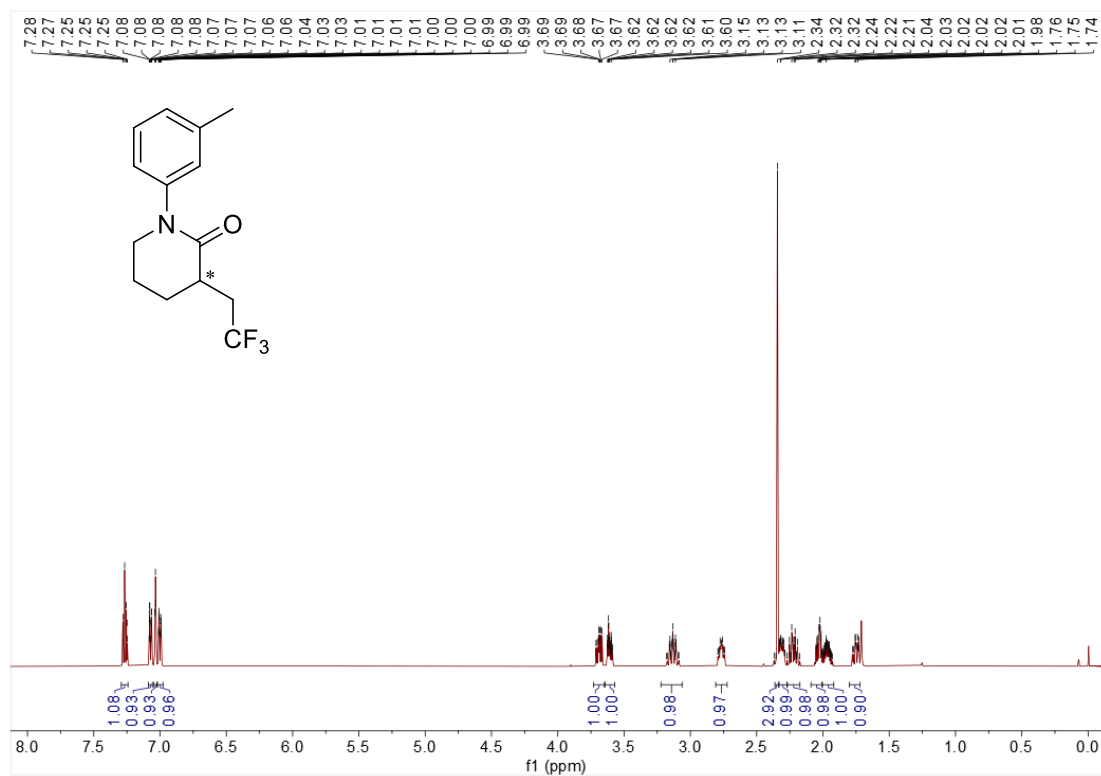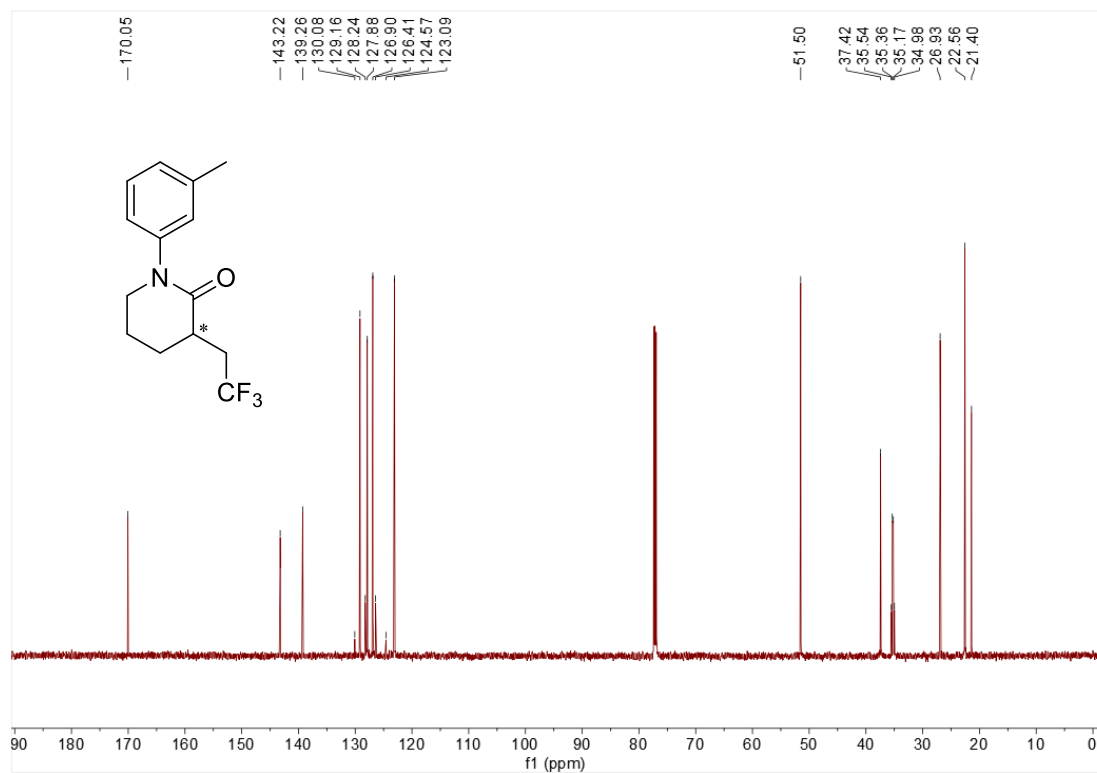

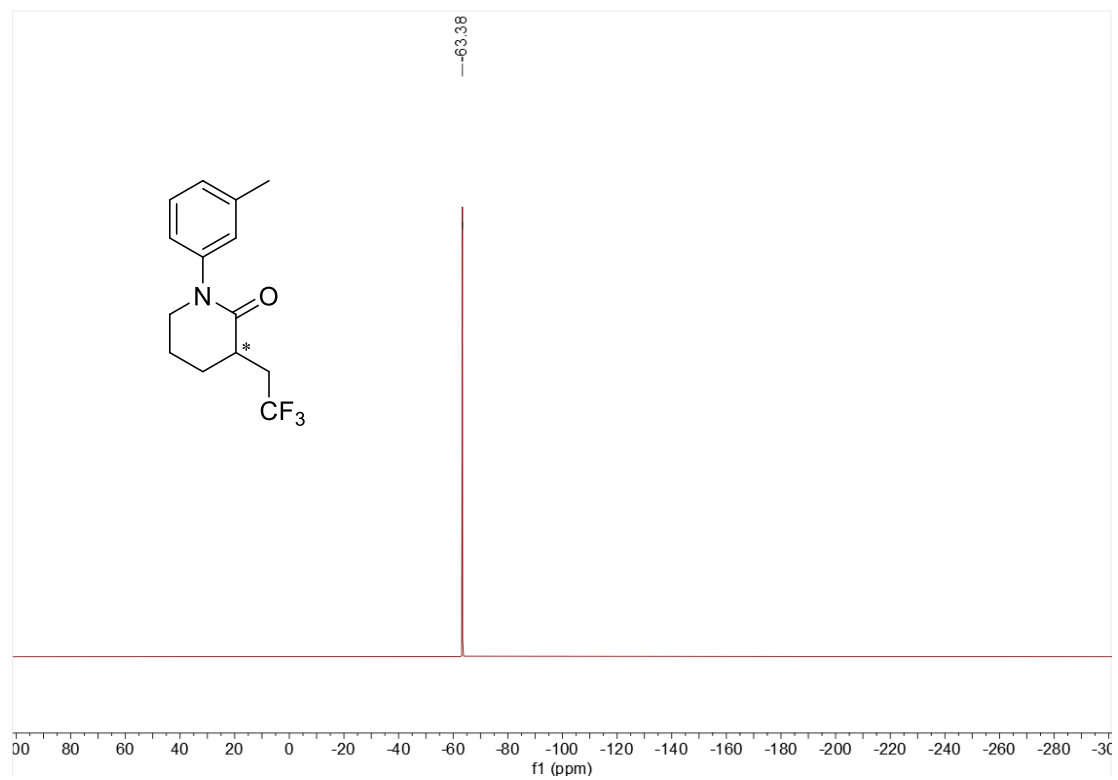

1-(4-methoxyphenyl)-3-(2,2,2-trifluoroethyl)piperidin-2-one (**4d**)

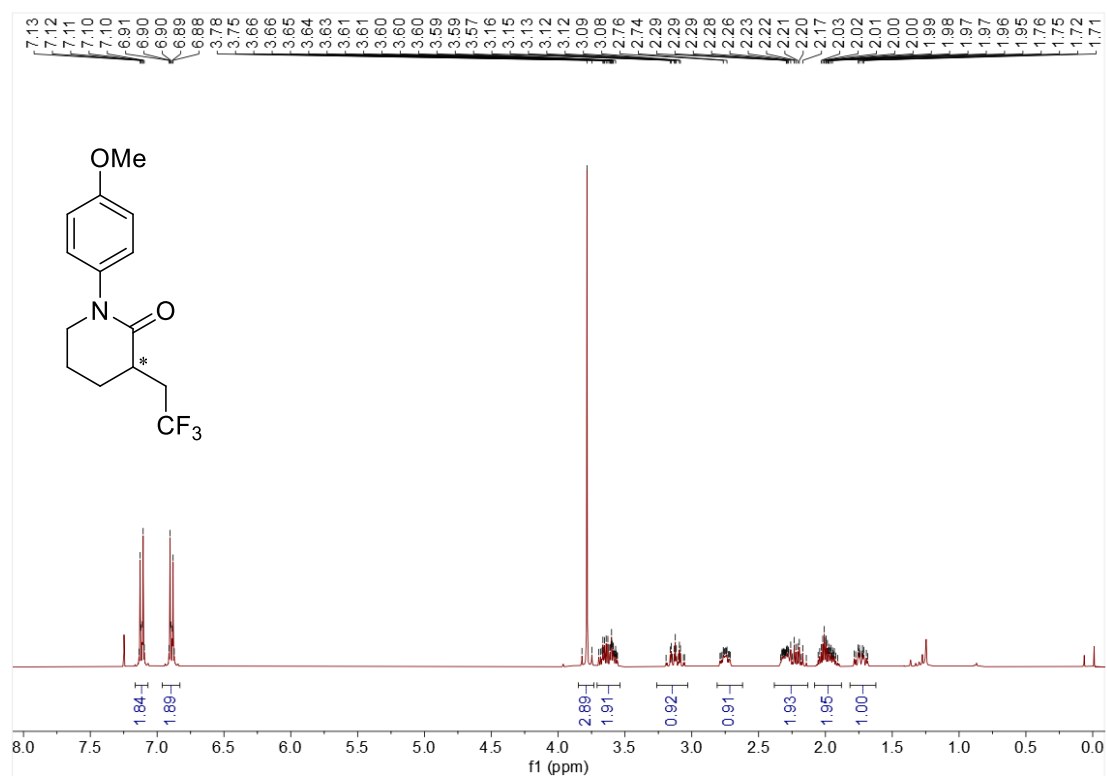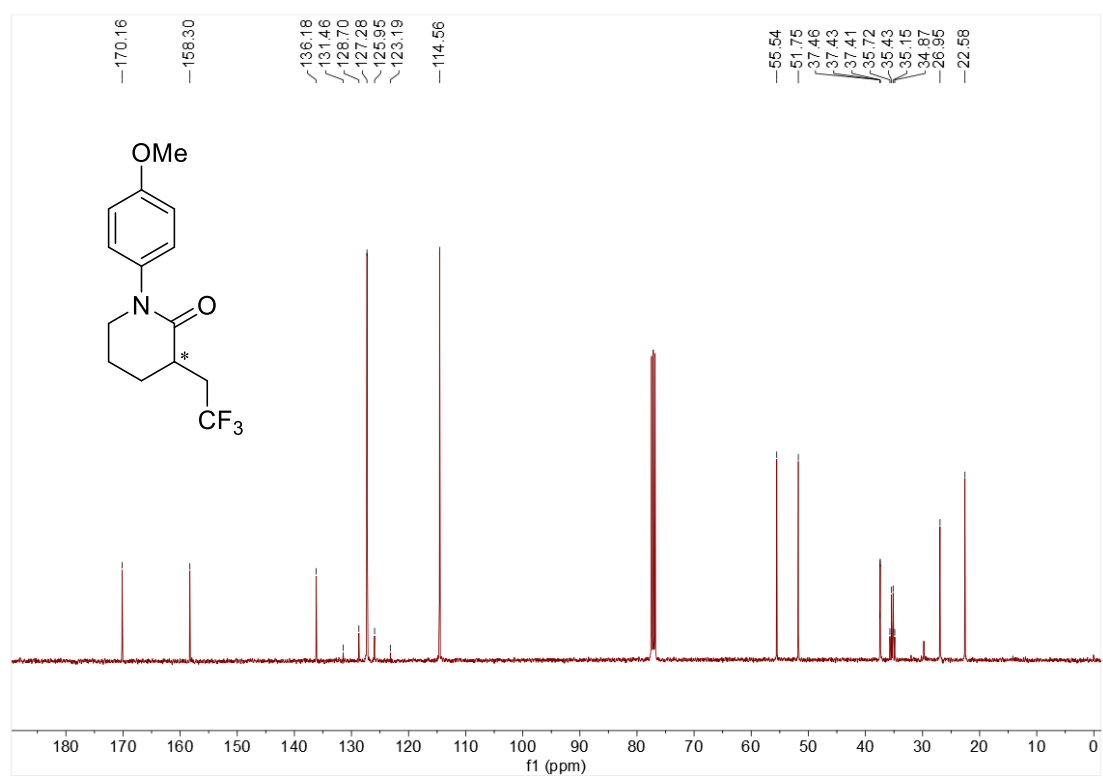

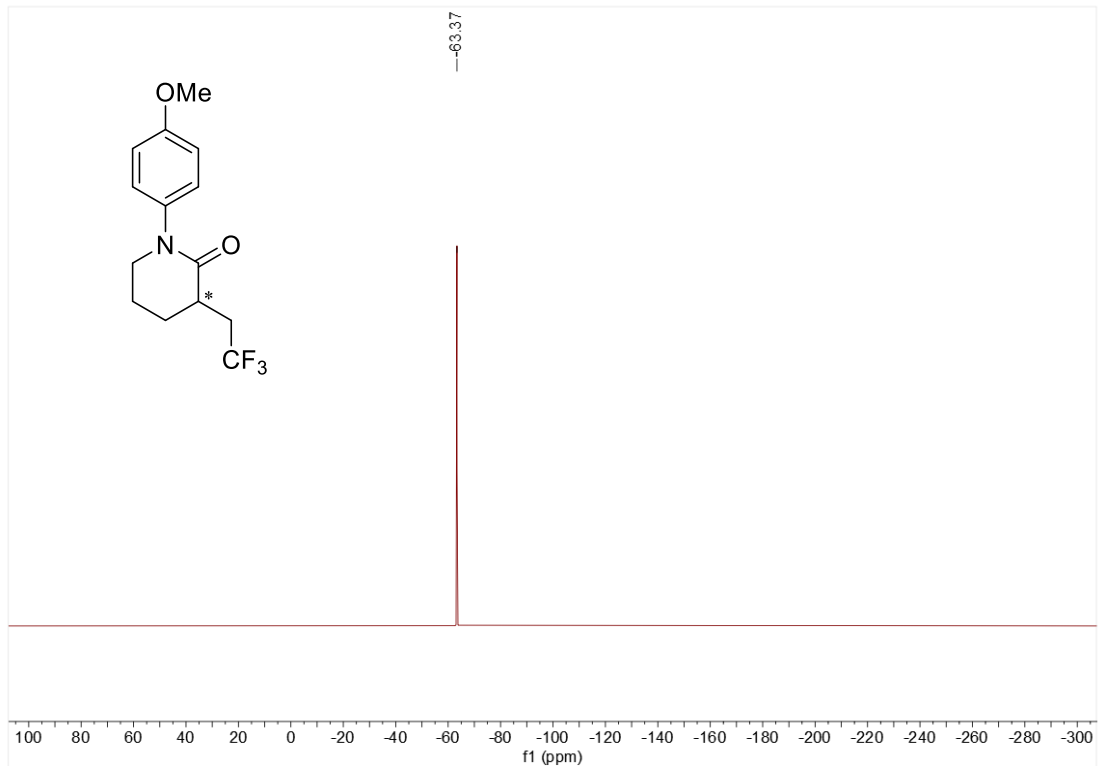

1-(4-(*tert*-butyl)phenyl)-3-(2,2,2-trifluoroethyl)piperidin-2-one (**4e**)

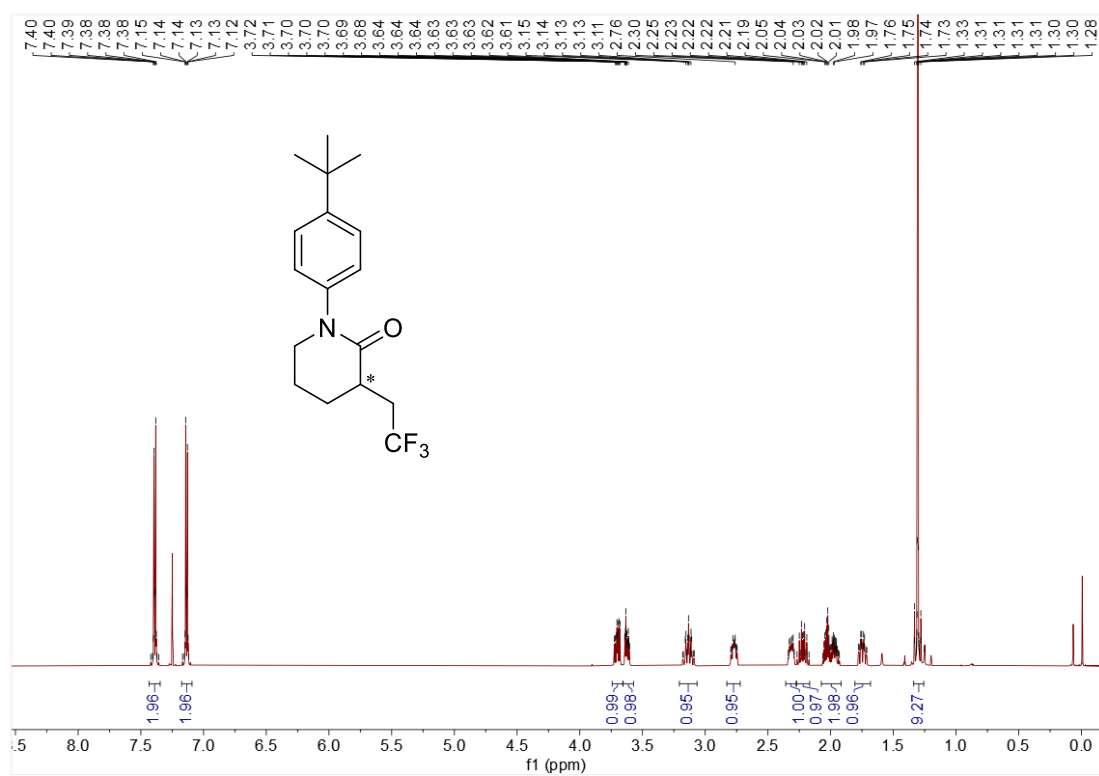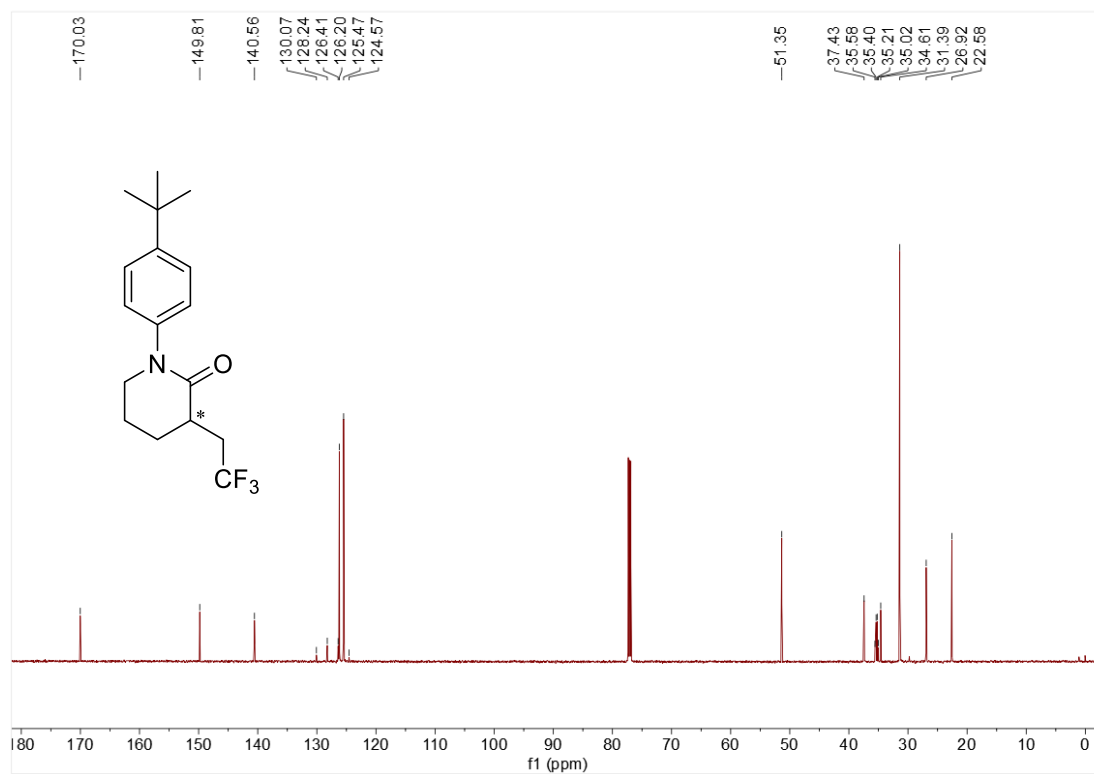

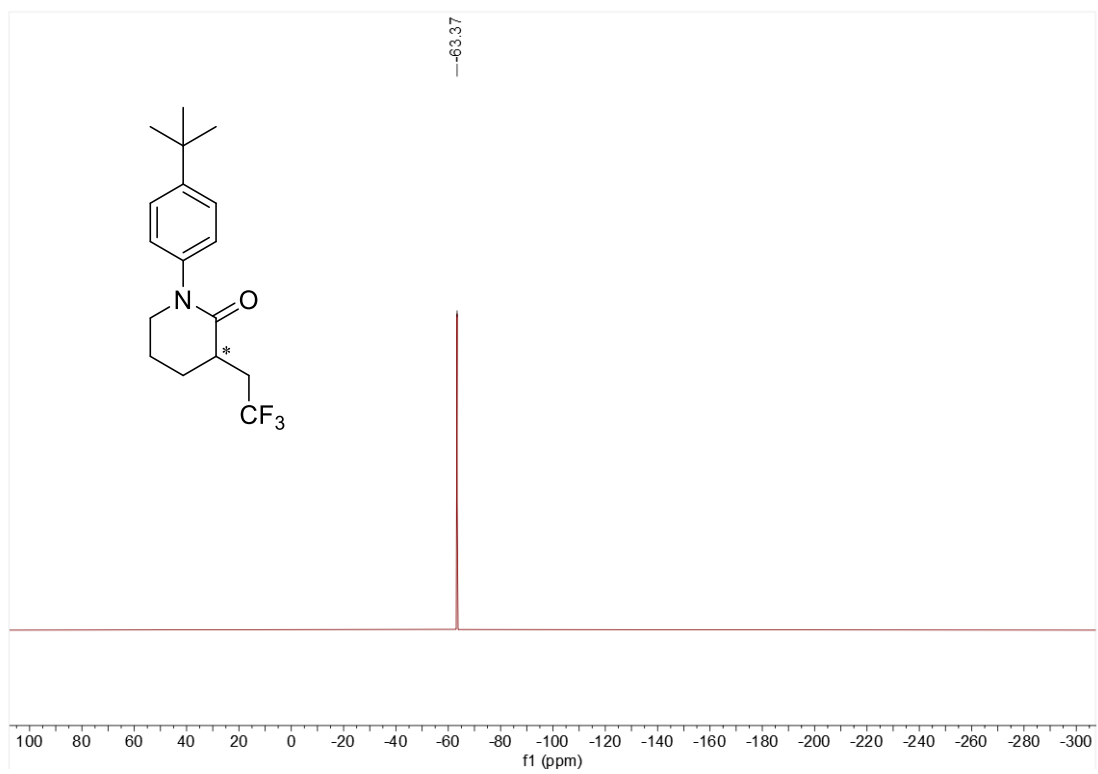

1-(2-chlorophenyl)-3-(2,2,2-trifluoroethyl)piperidin-2-one (**4f**)

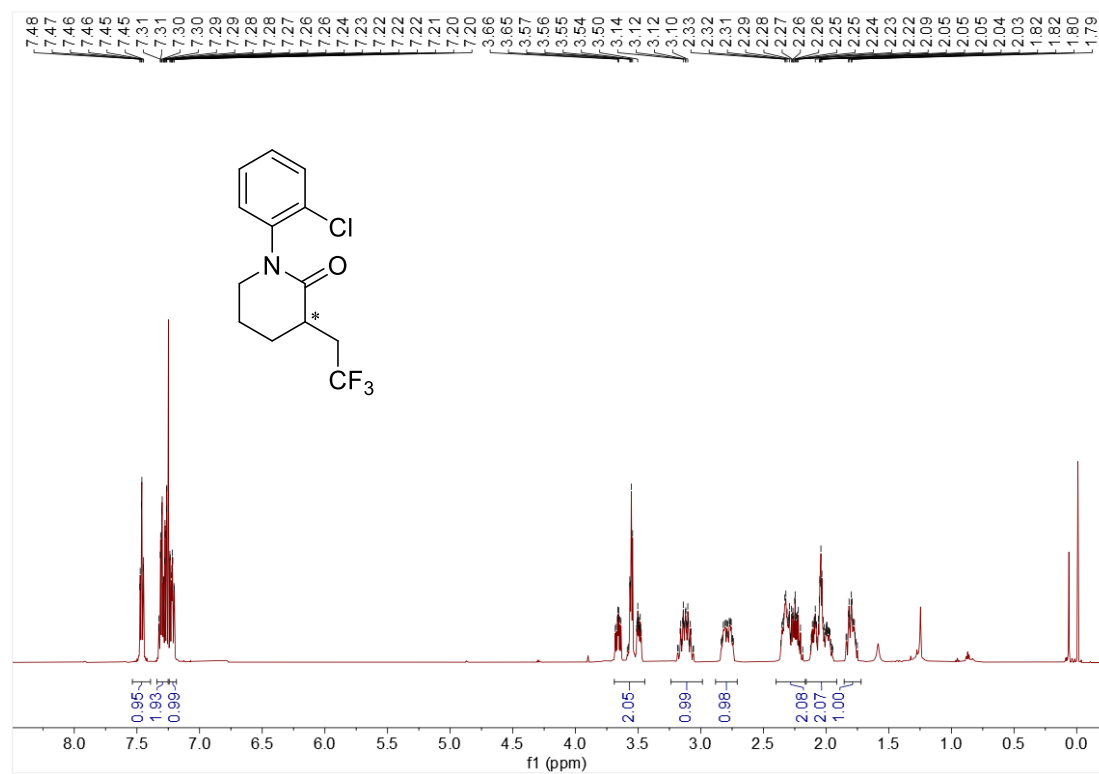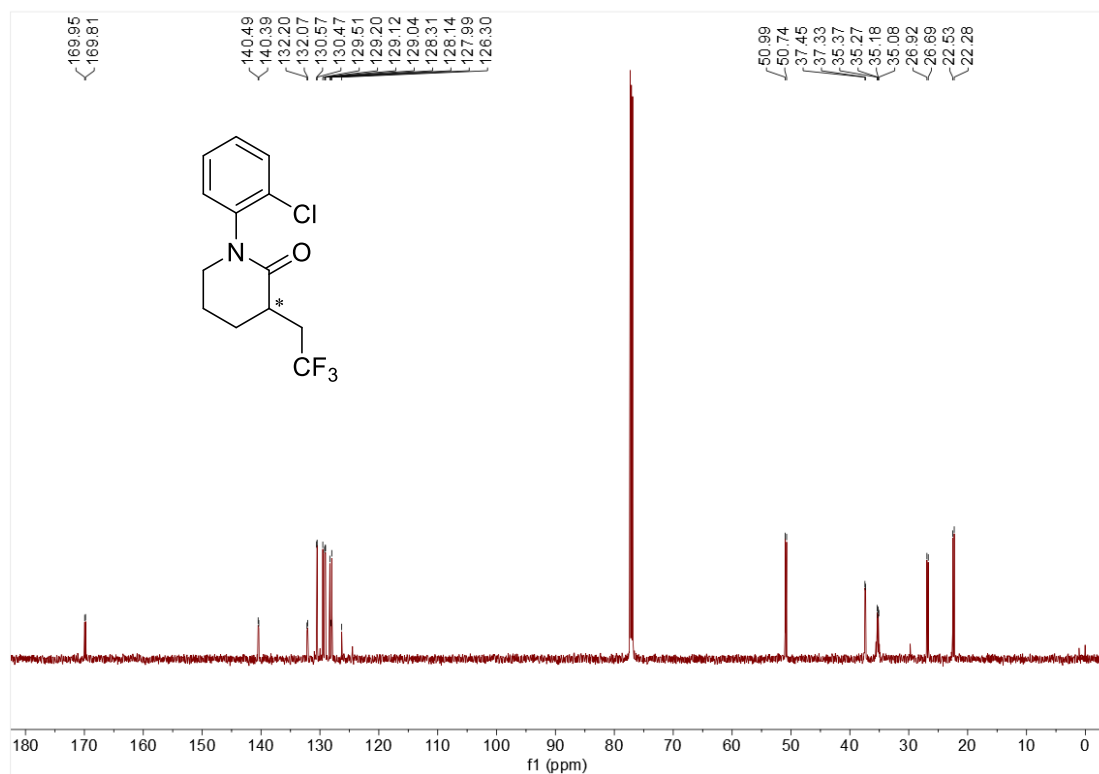

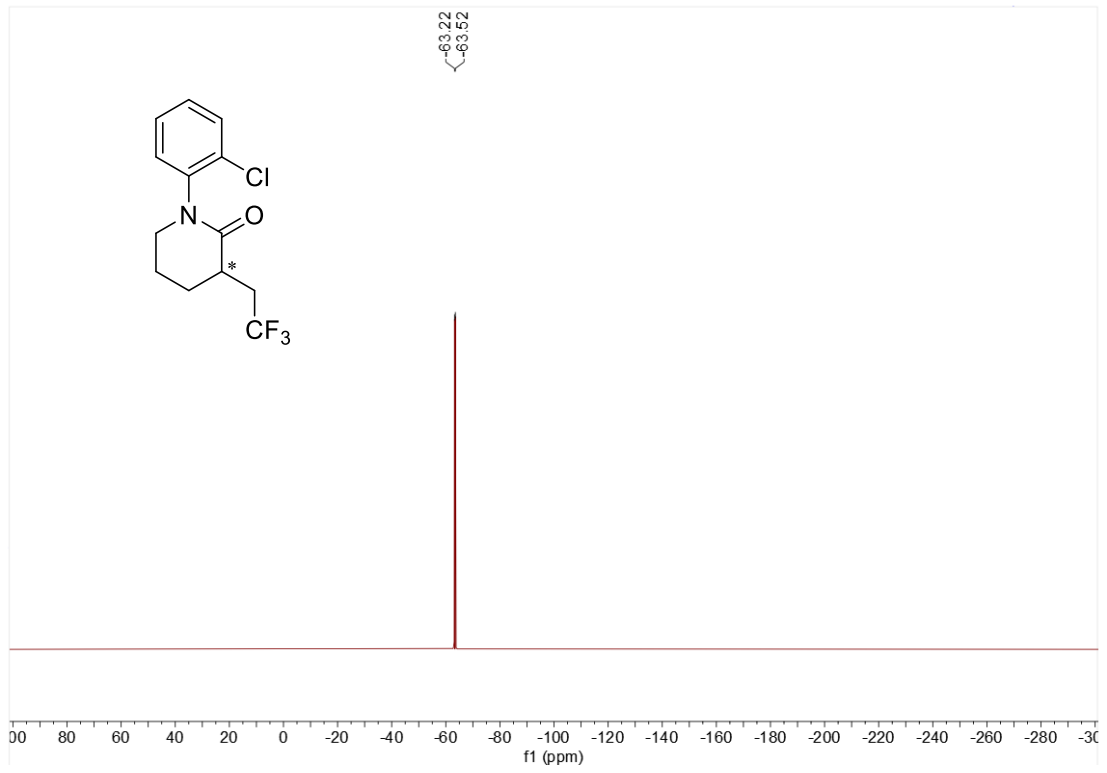



1-(3-fluorophenyl)-3-(2,2,2-trifluoroethyl)piperidin-2-one (**4g**)

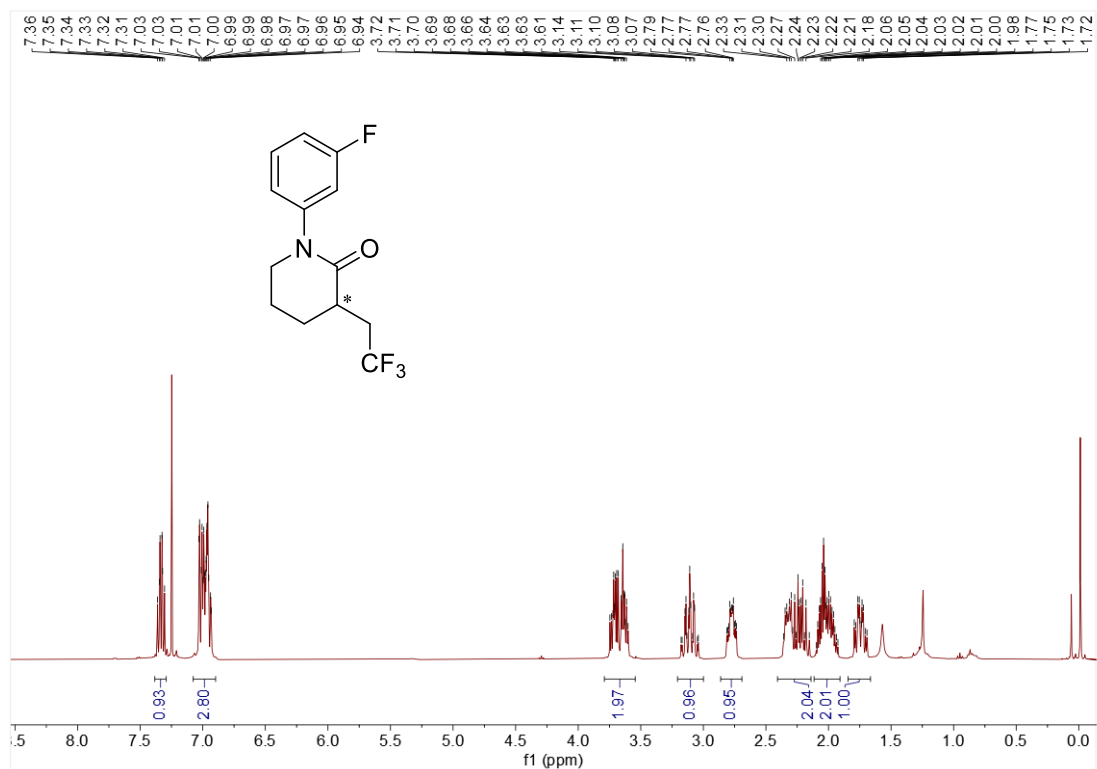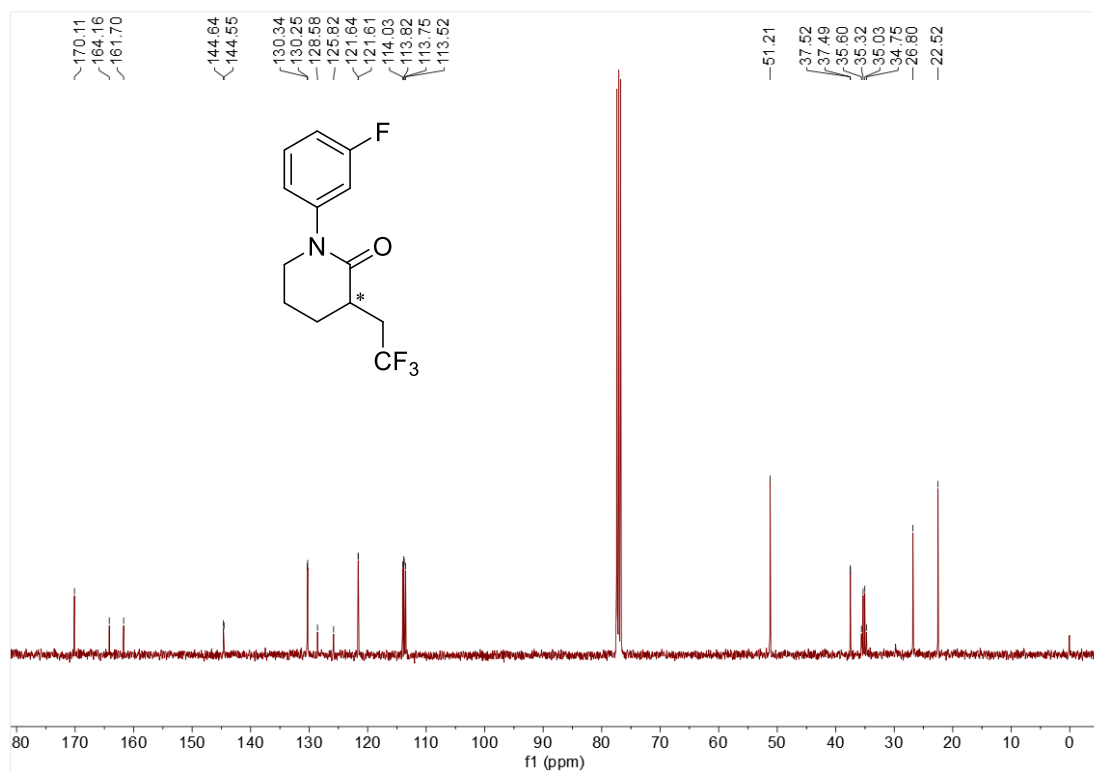

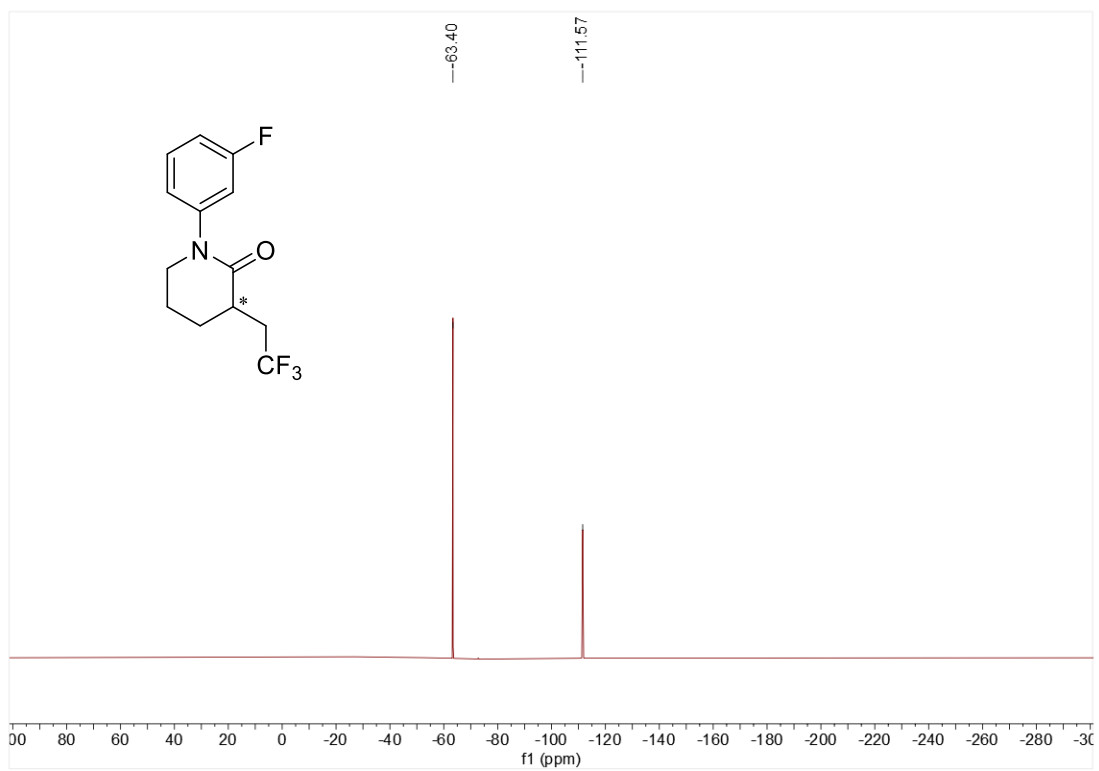

1-(3-bromophenyl)-3-(2,2,2-trifluoroethyl)piperidin-2-one (**4h**)

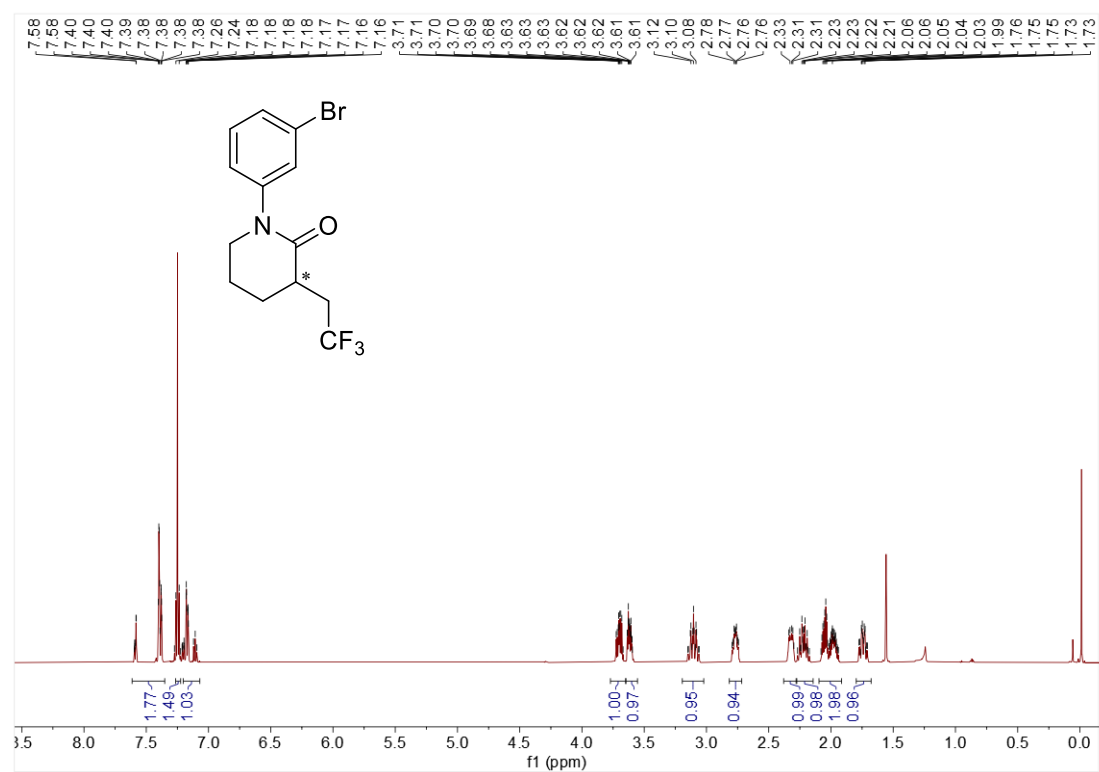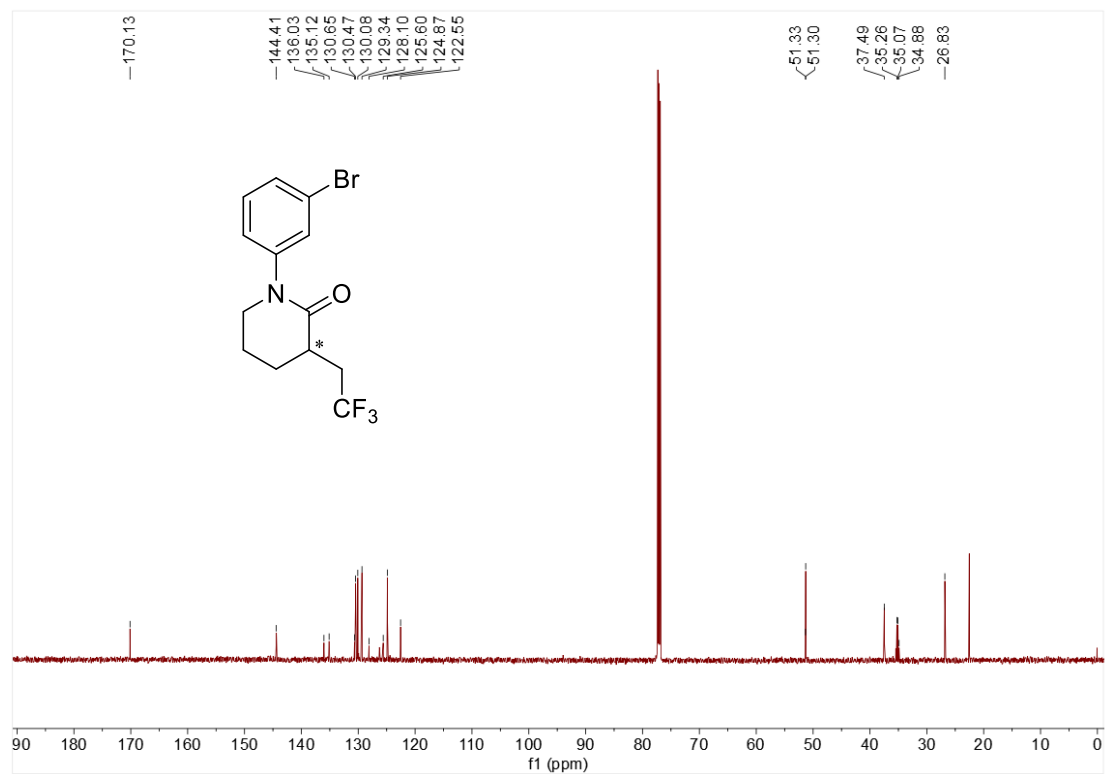

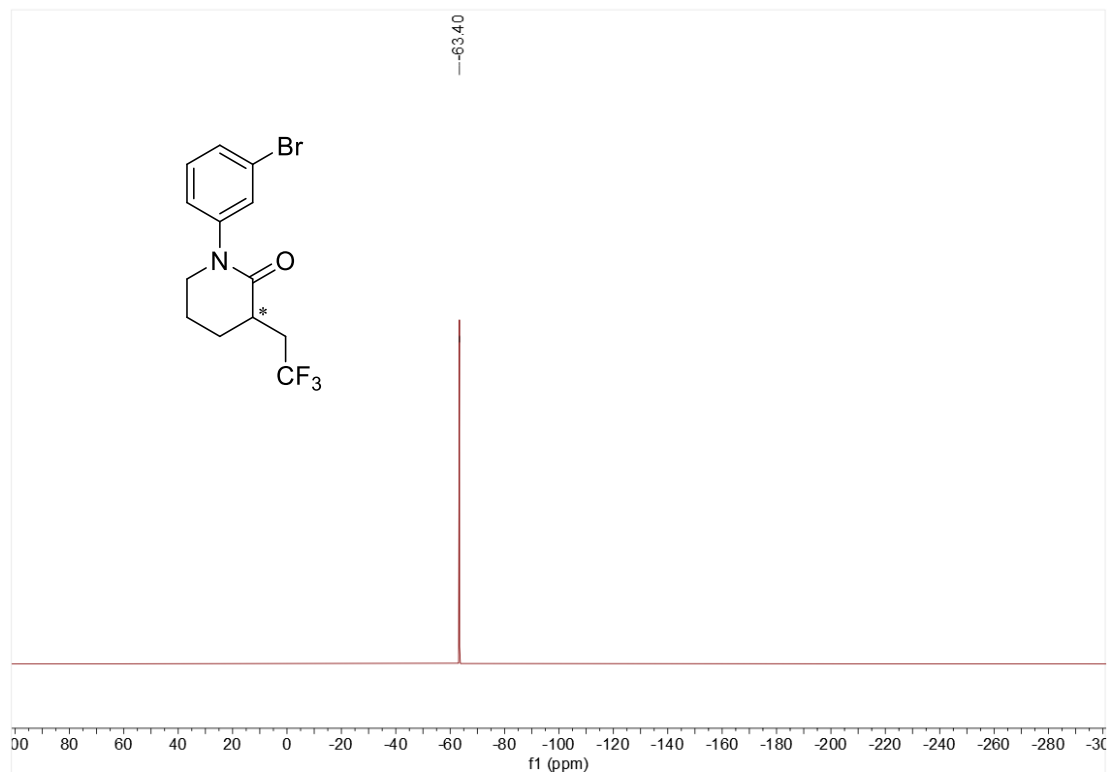

1-(4-bromophenyl)-3-(2,2,2-trifluoroethyl)piperidin-2-one (**4i**)

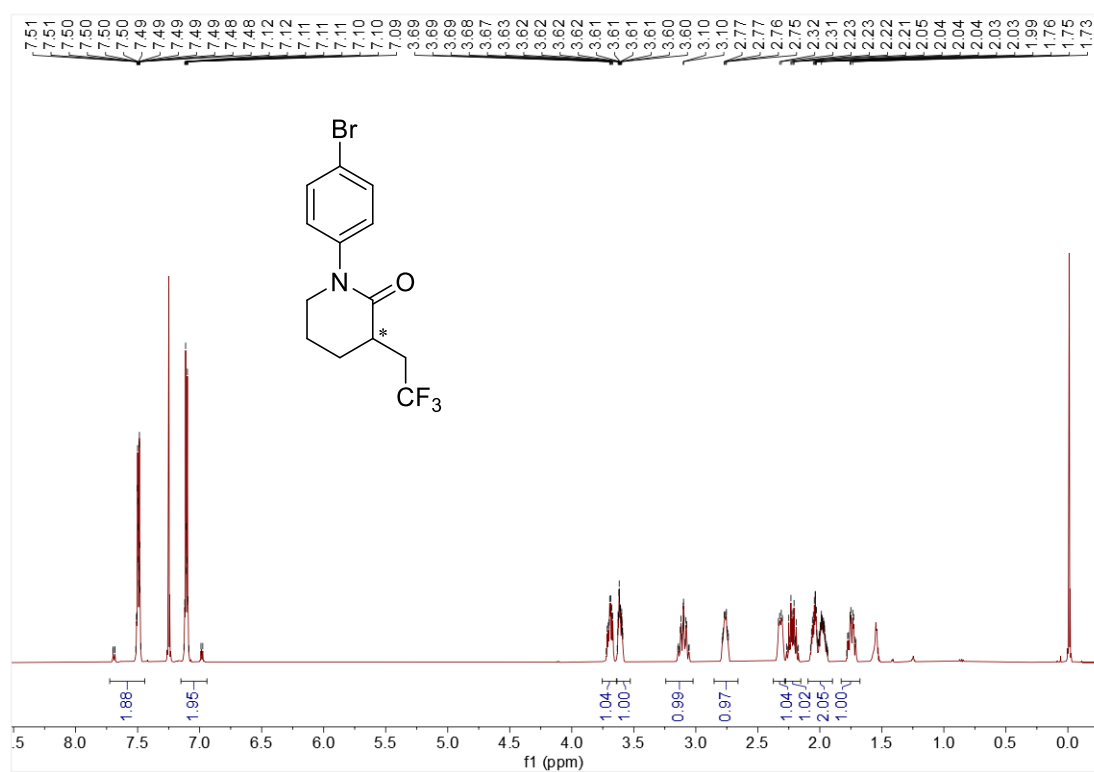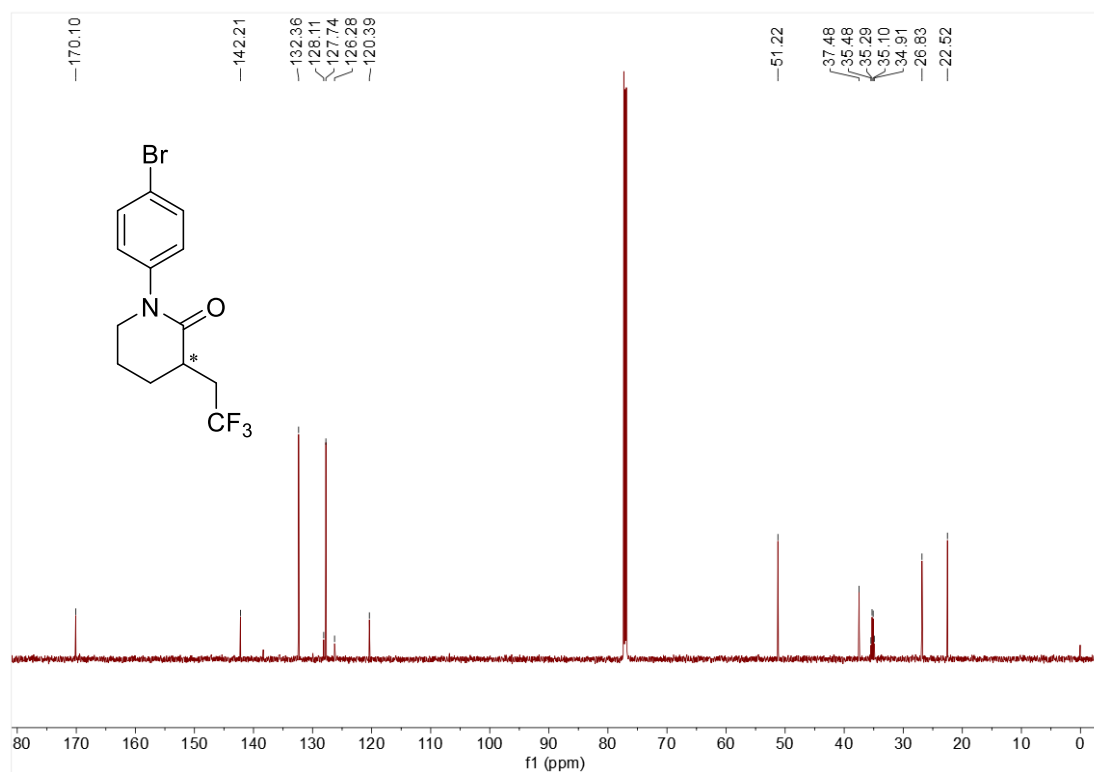

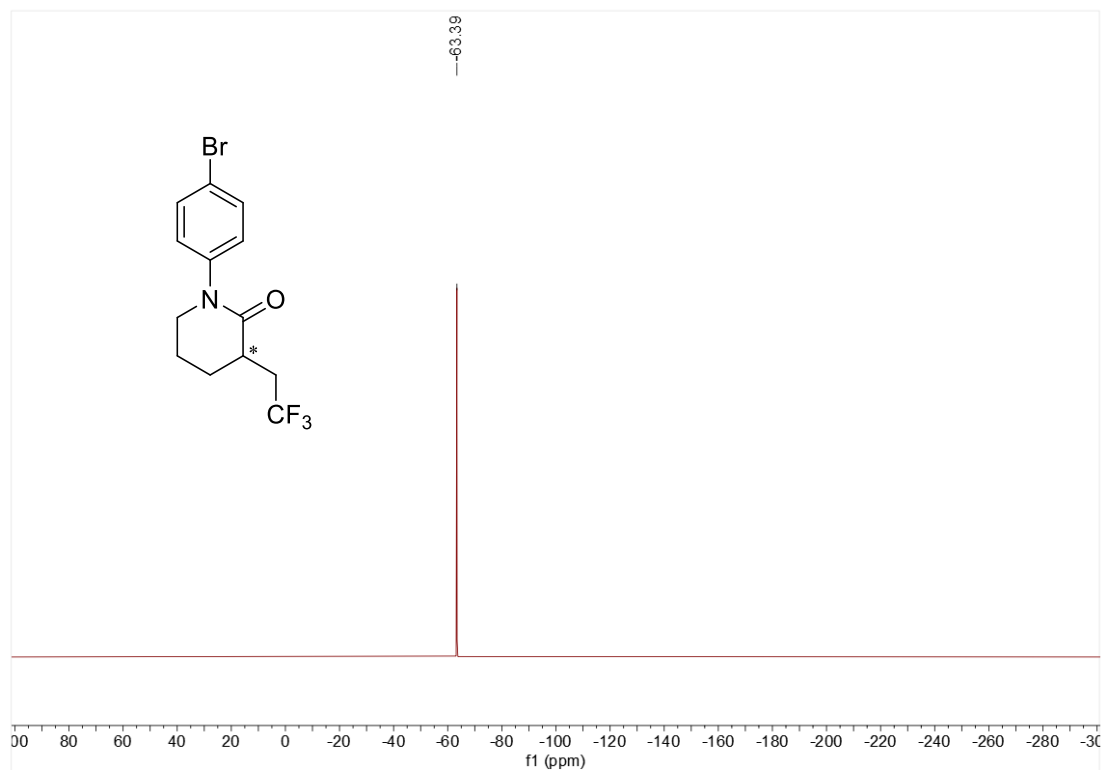

1-(4-fluorophenyl)-3-(2,2,2-trifluoroethyl)piperidin-2-one (**4j**)

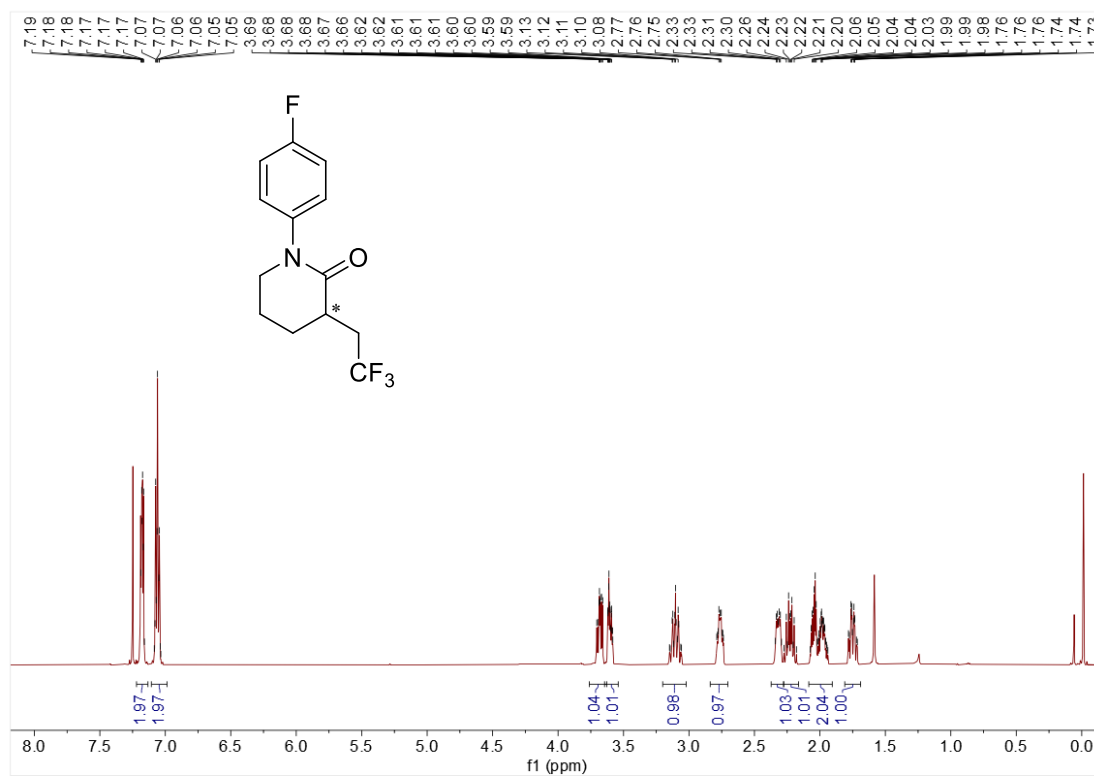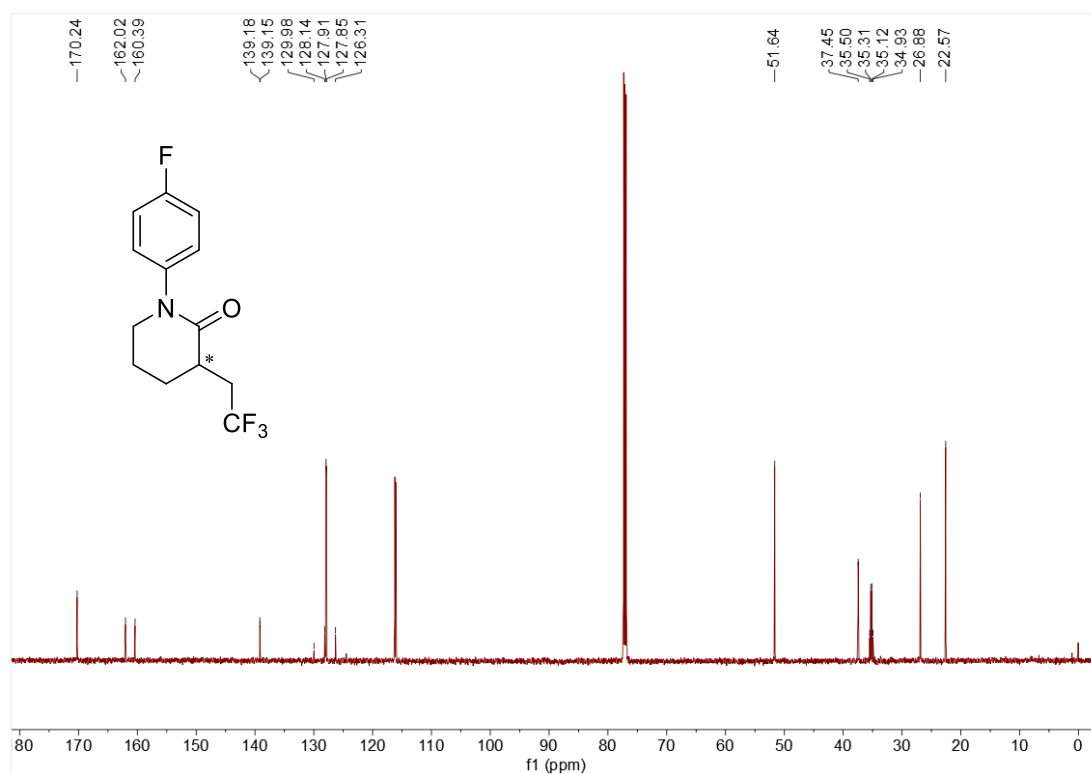

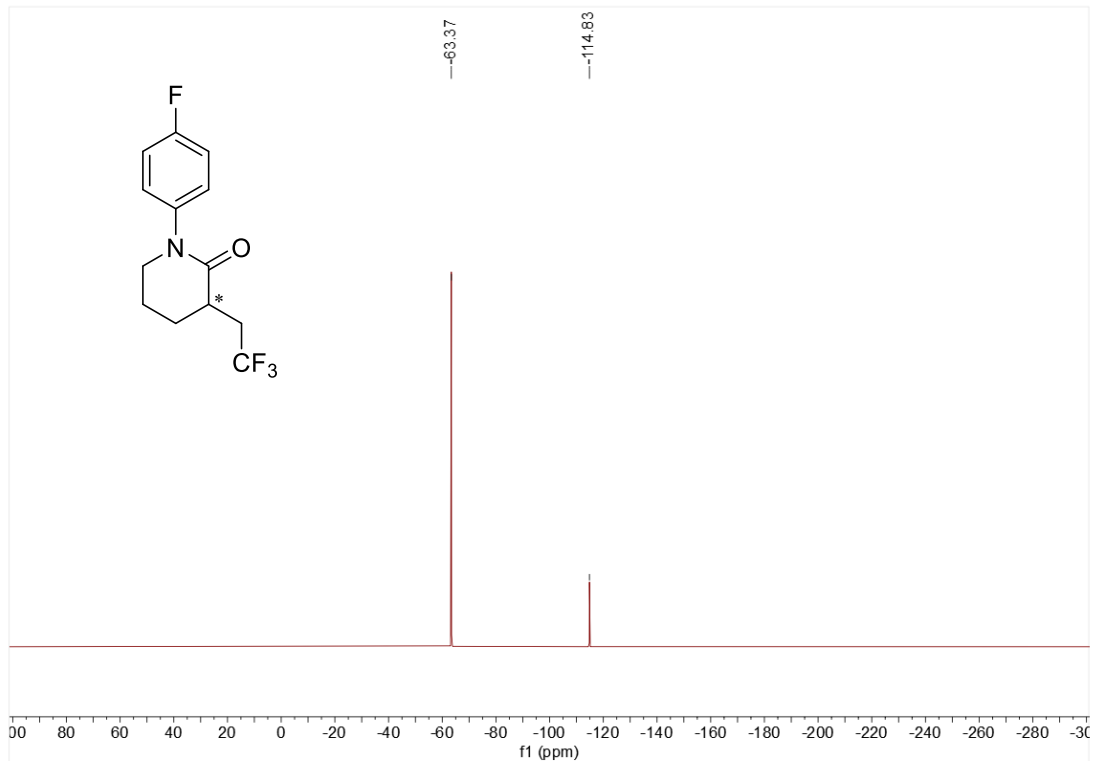



1-([1,1'-biphenyl]-4-yl)-3-(2,2,2-trifluoroethyl)piperidin-2-one (**4k**)

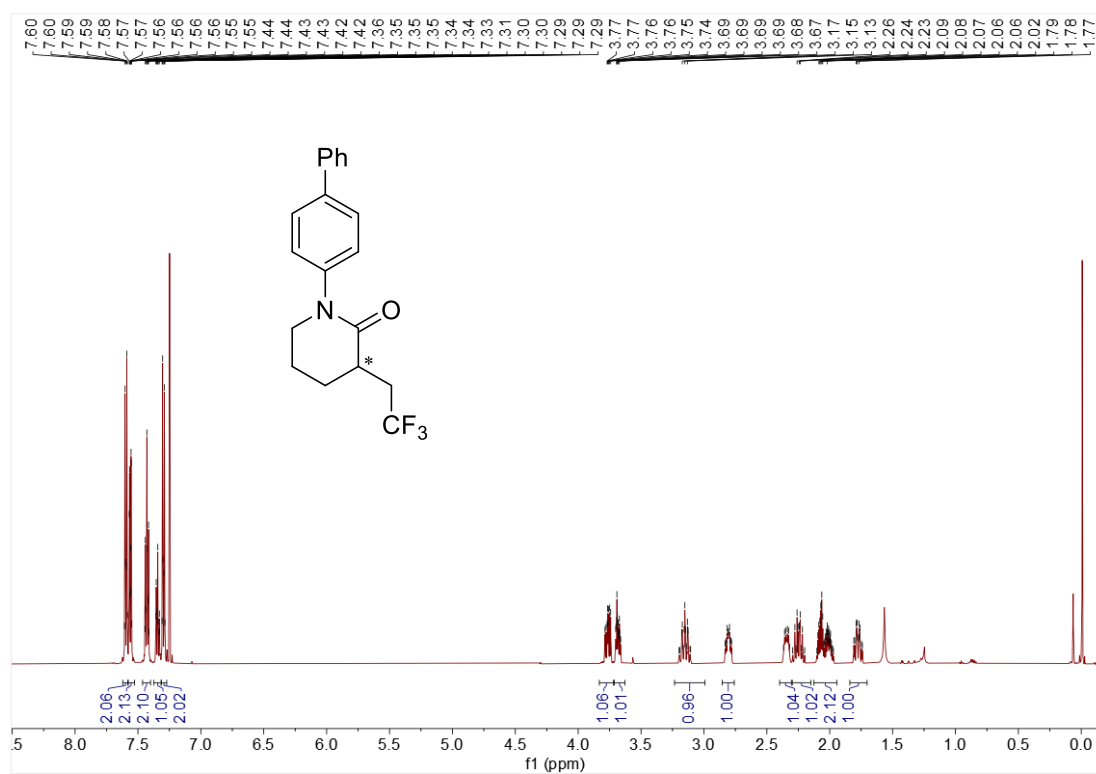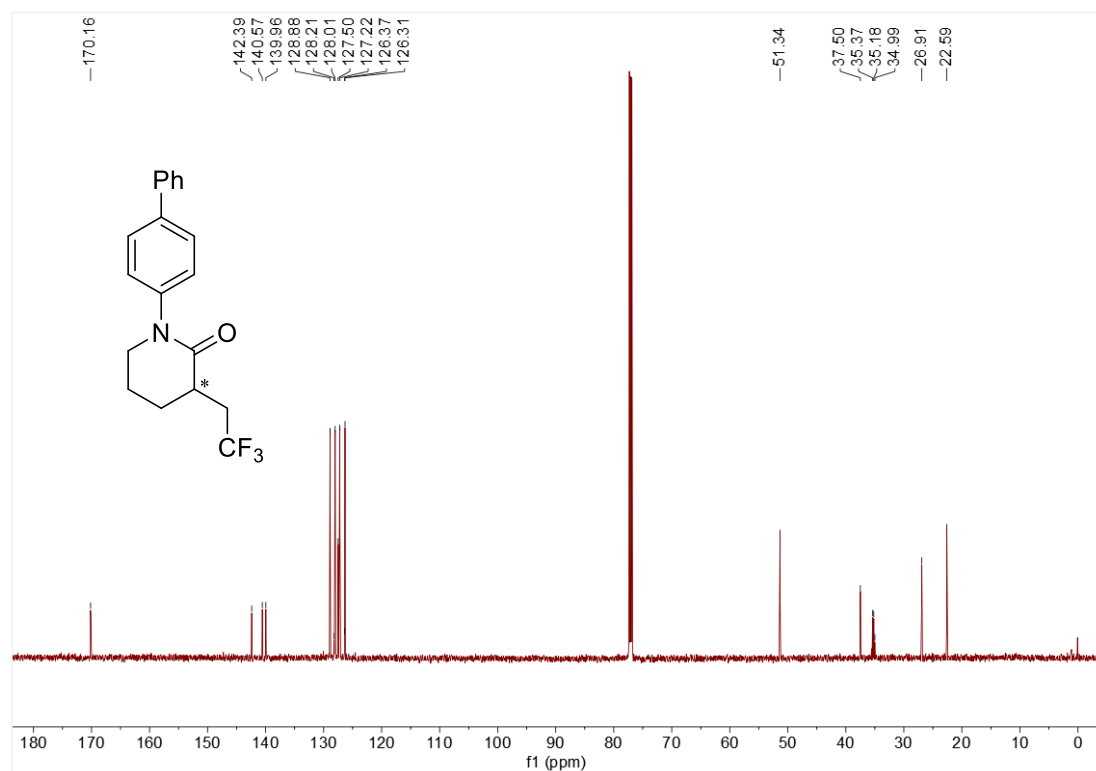

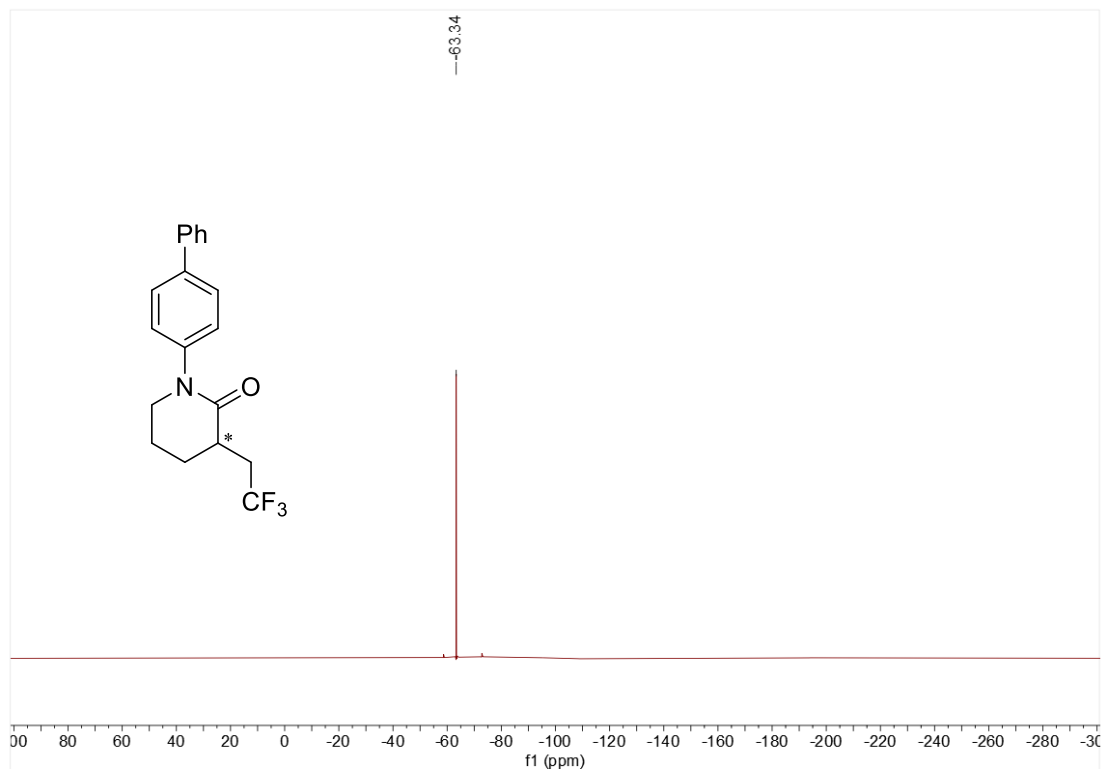

1-(3,4-dimethylphenyl)-3-(2,2,2-trifluoroethyl)piperidin-2-one (**4I**)

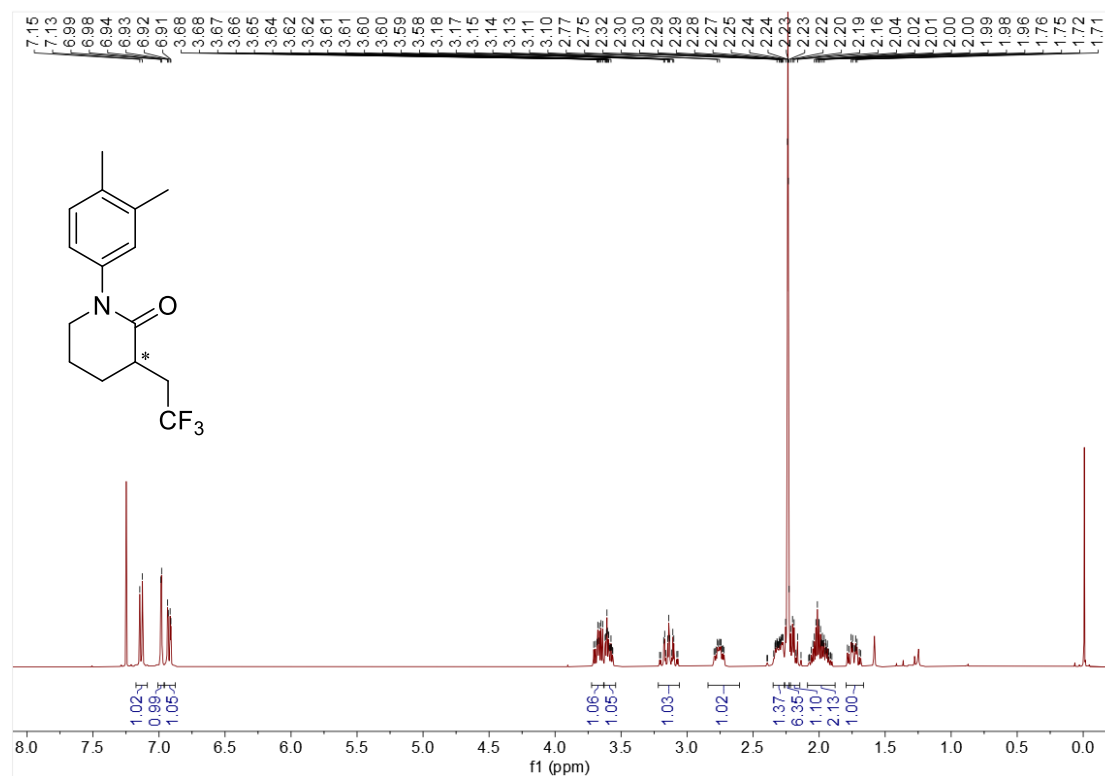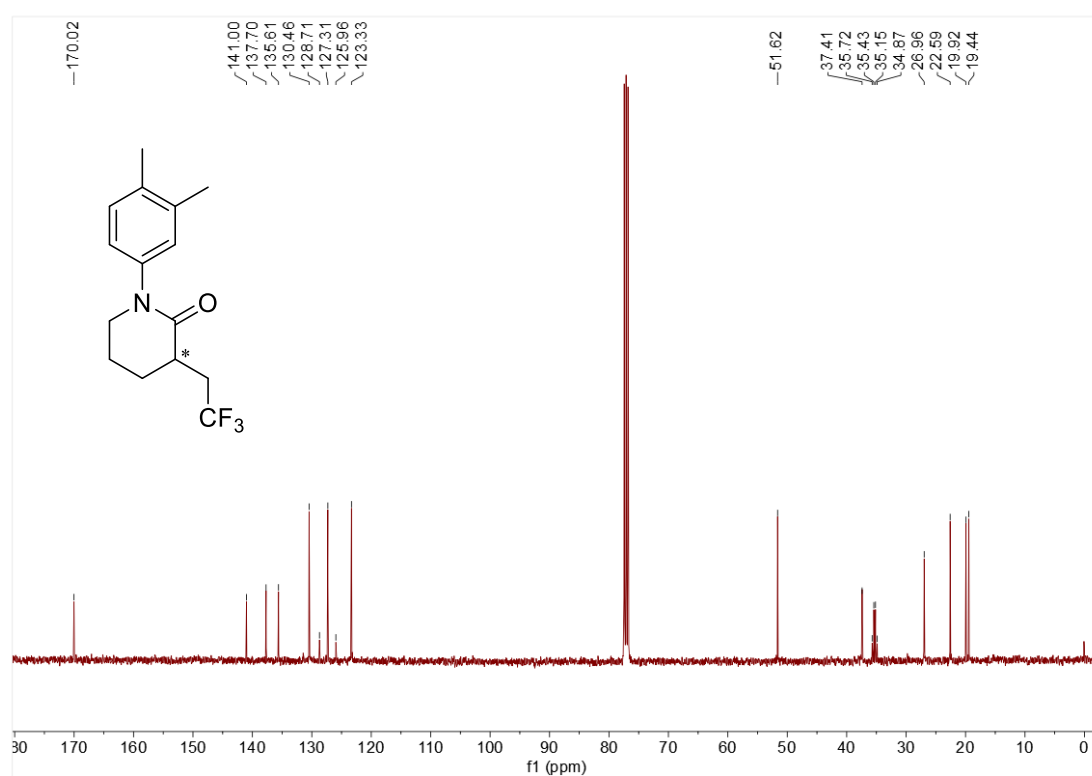

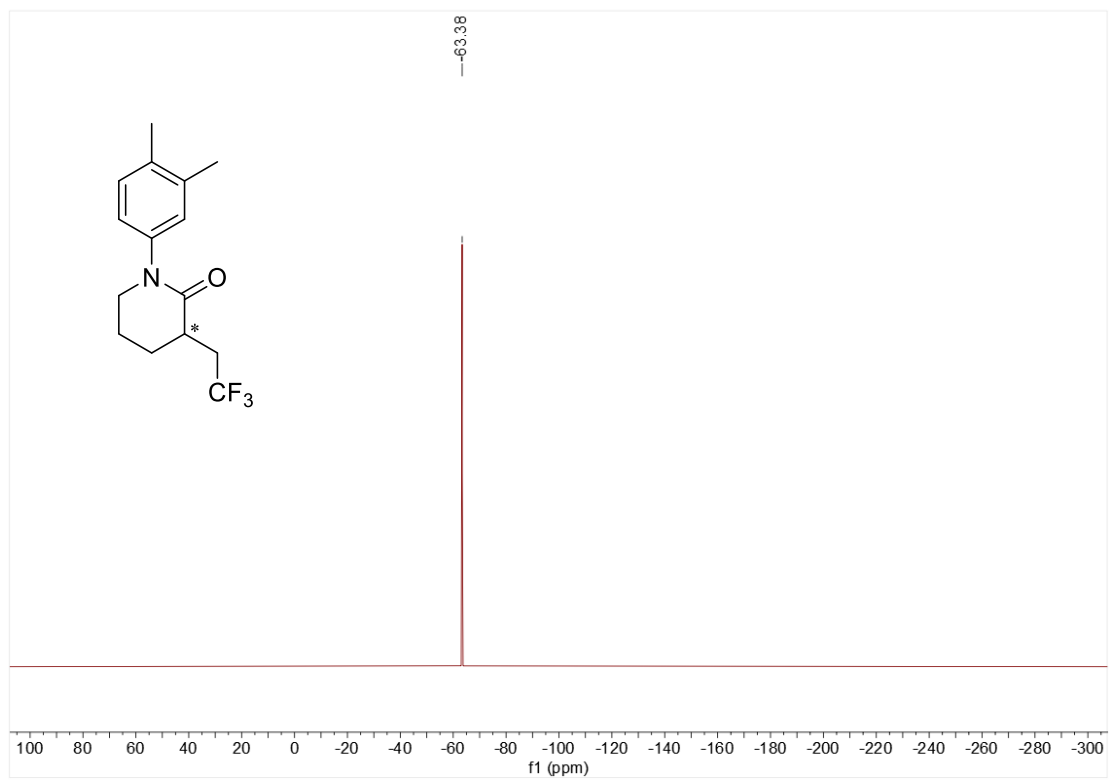

1-(3,5-dimethylphenyl)-3-(2,2,2-trifluoroethyl)piperidin-2-one (**4m**)

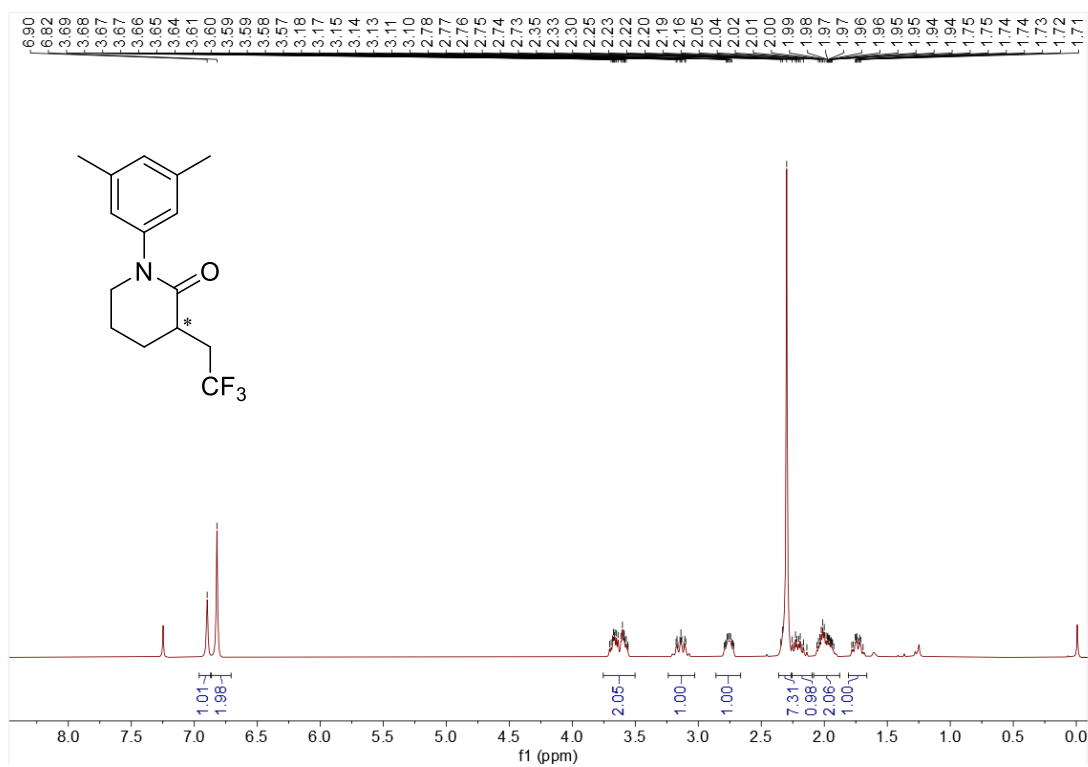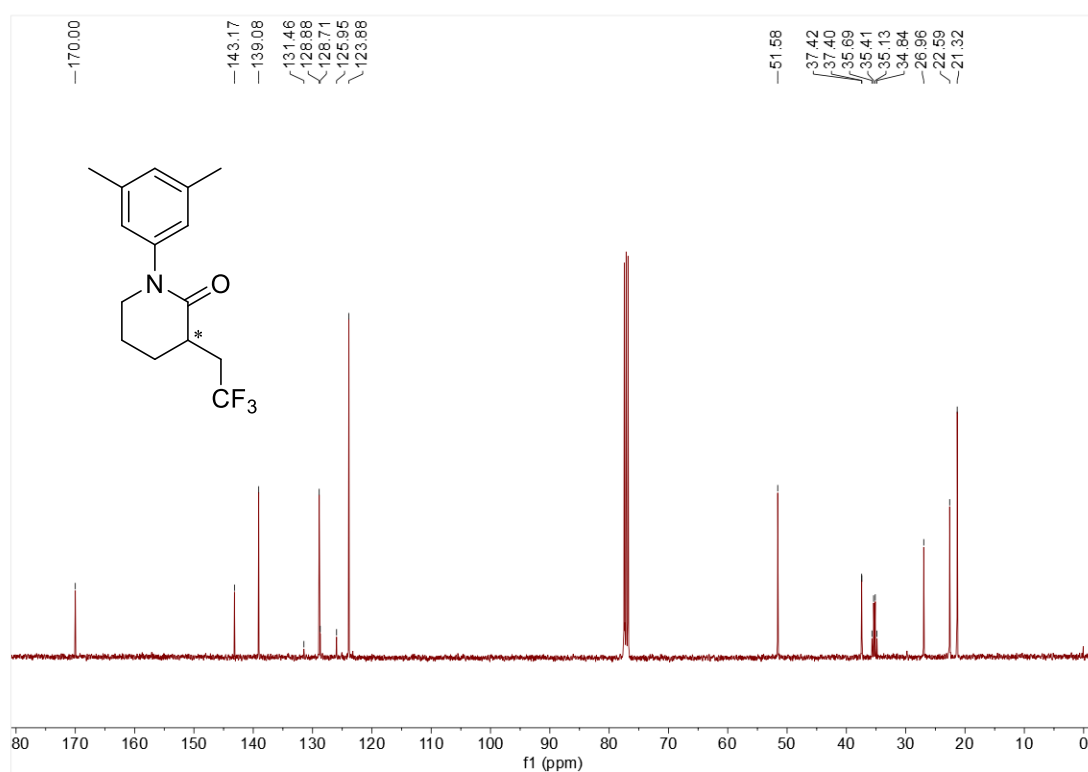

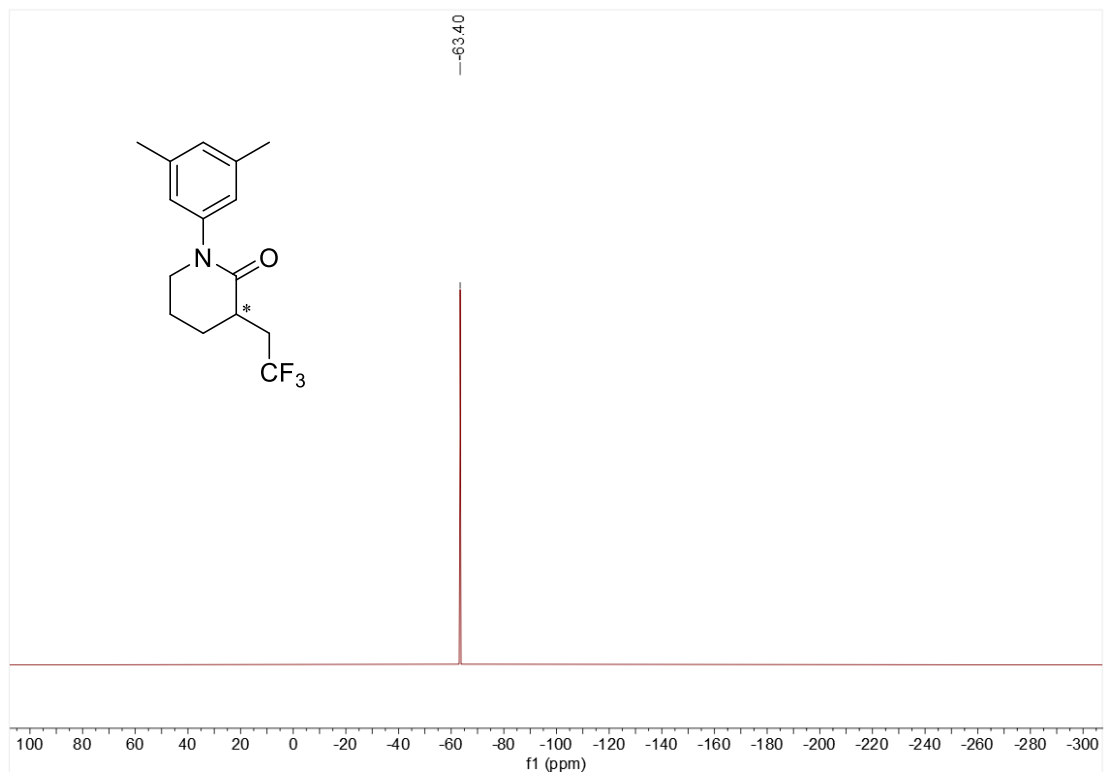

1-phenyl-3-(2,2,2-trifluoroethyl)pyrrolidine (**5**)

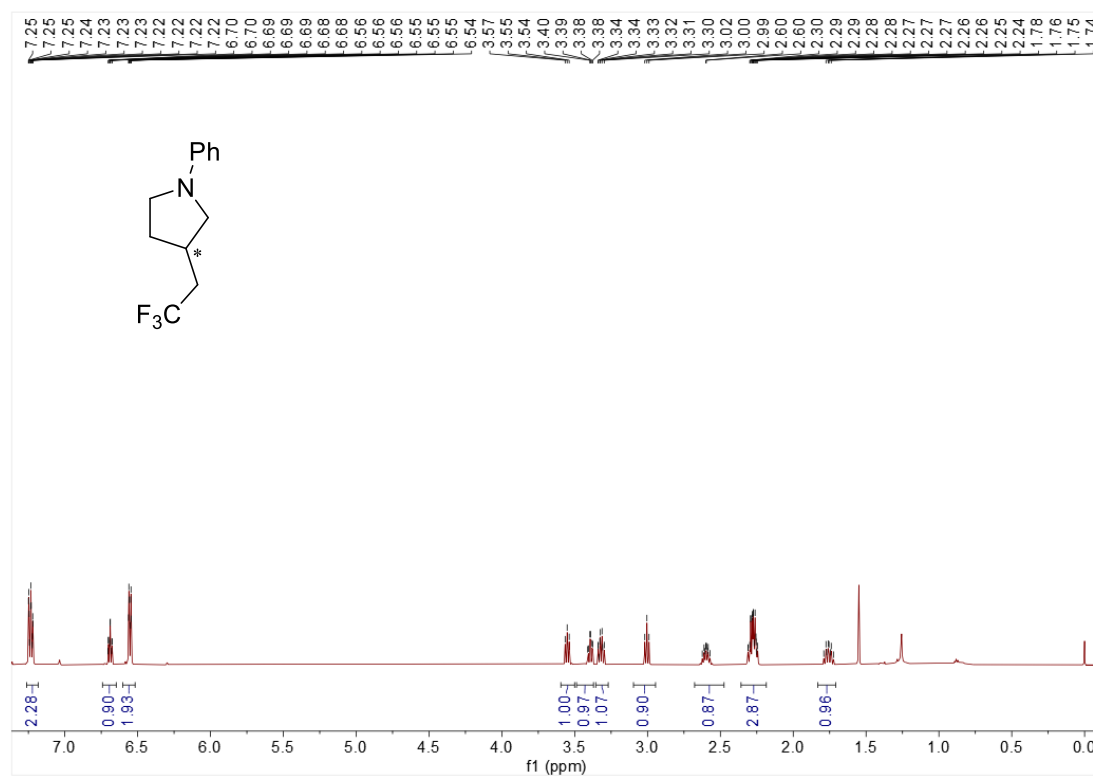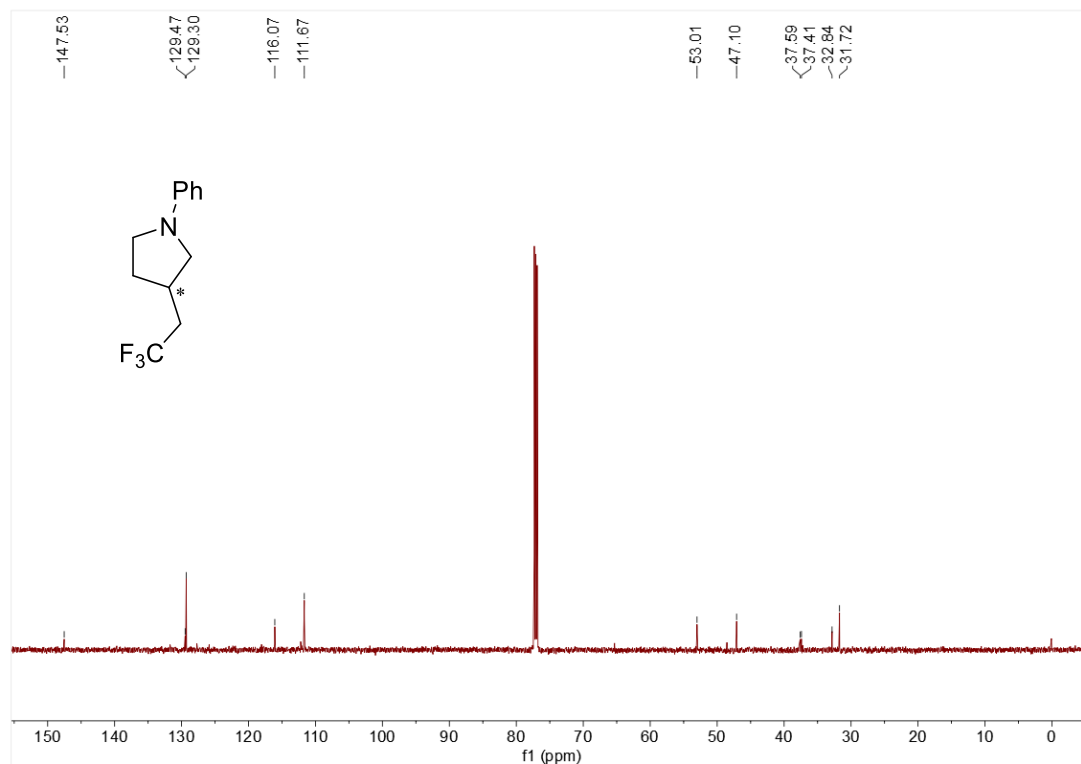

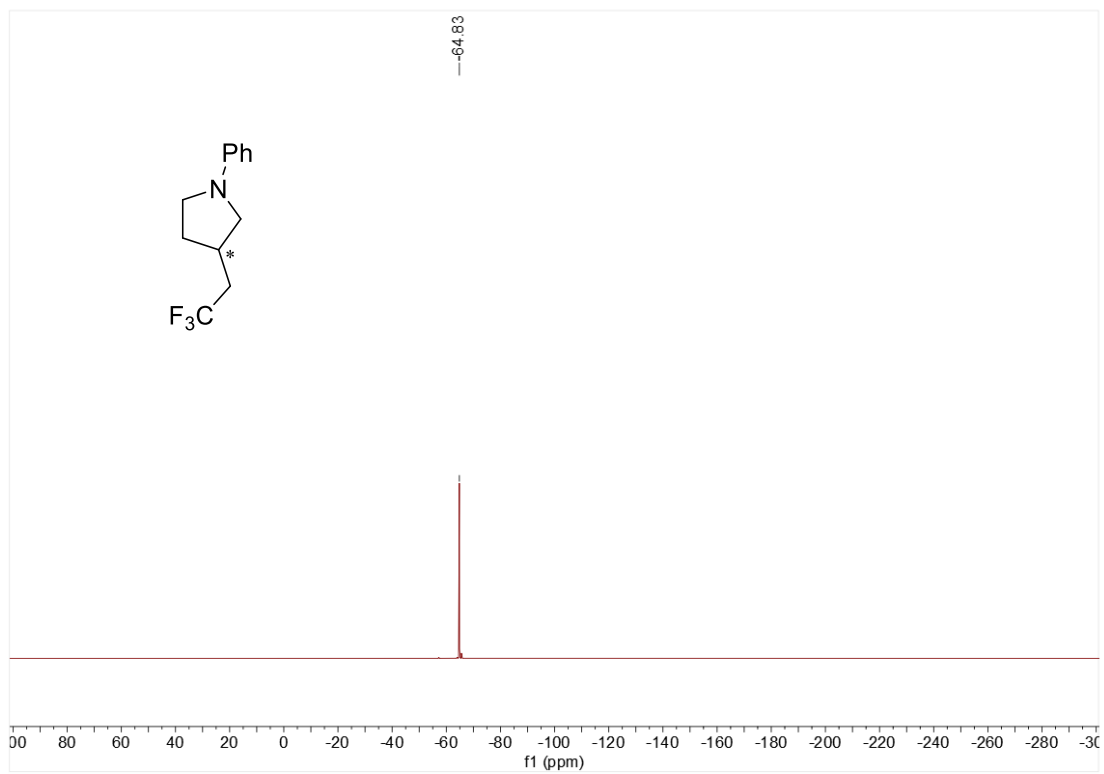



1-benzyl-3-(2,2,2-trifluoroethyl)pyrrolidine (7)

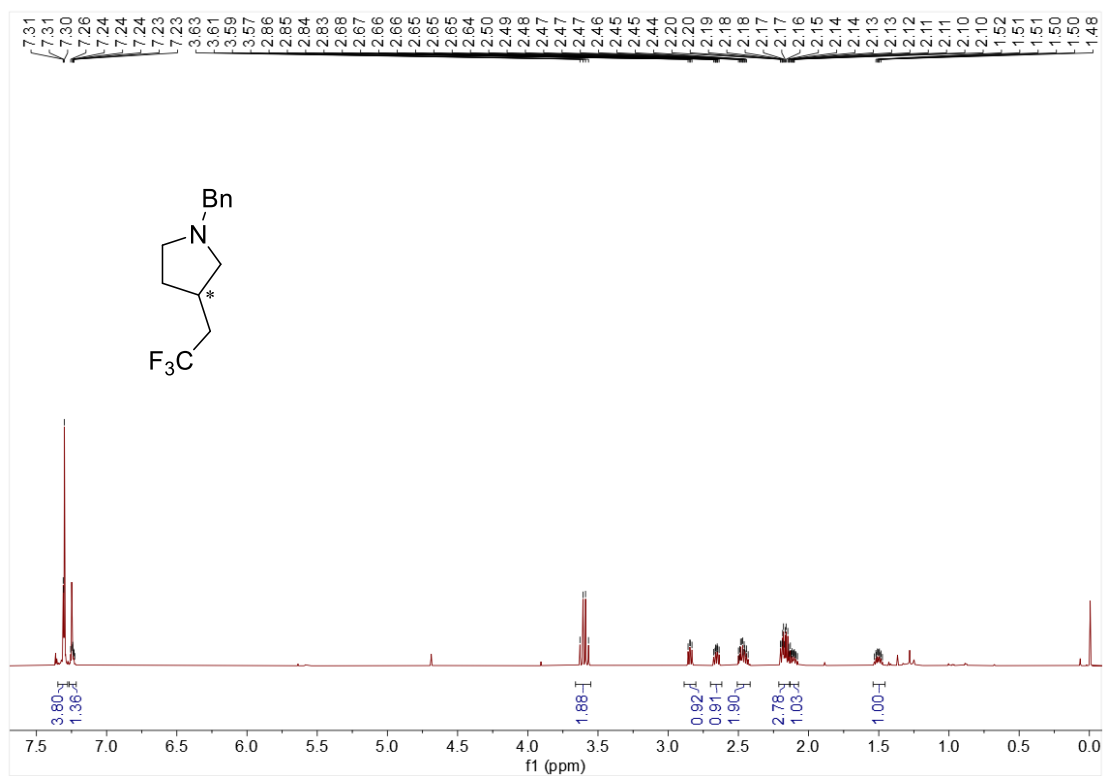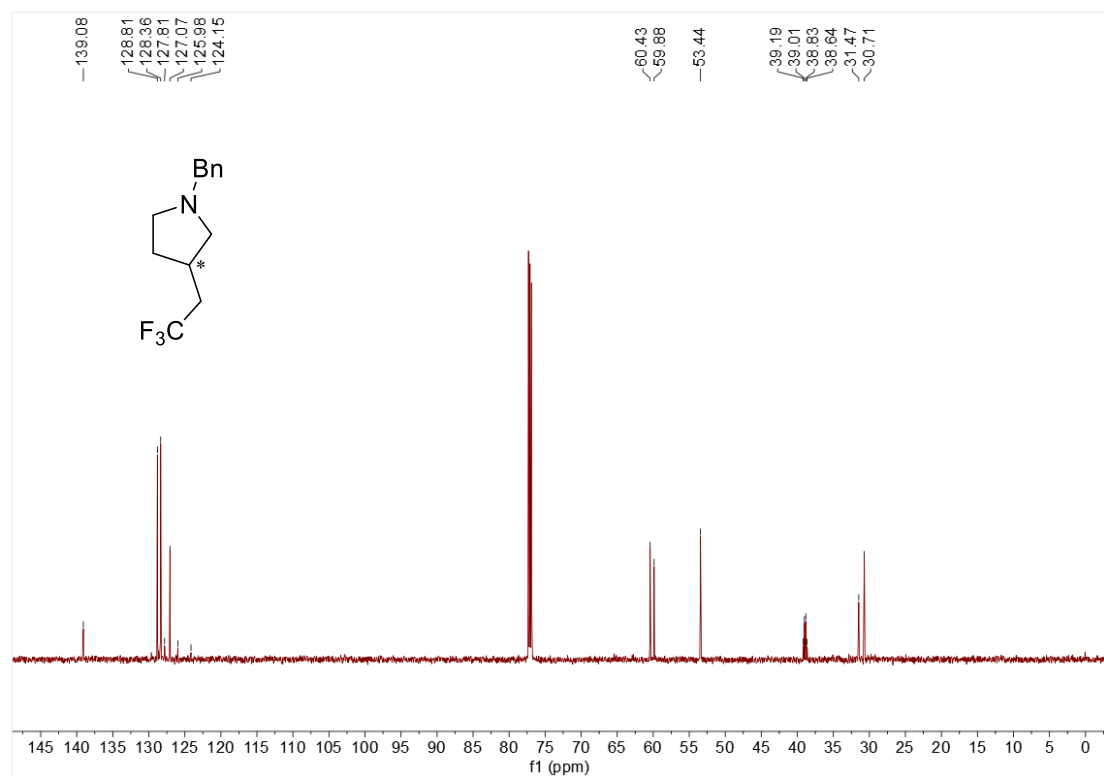

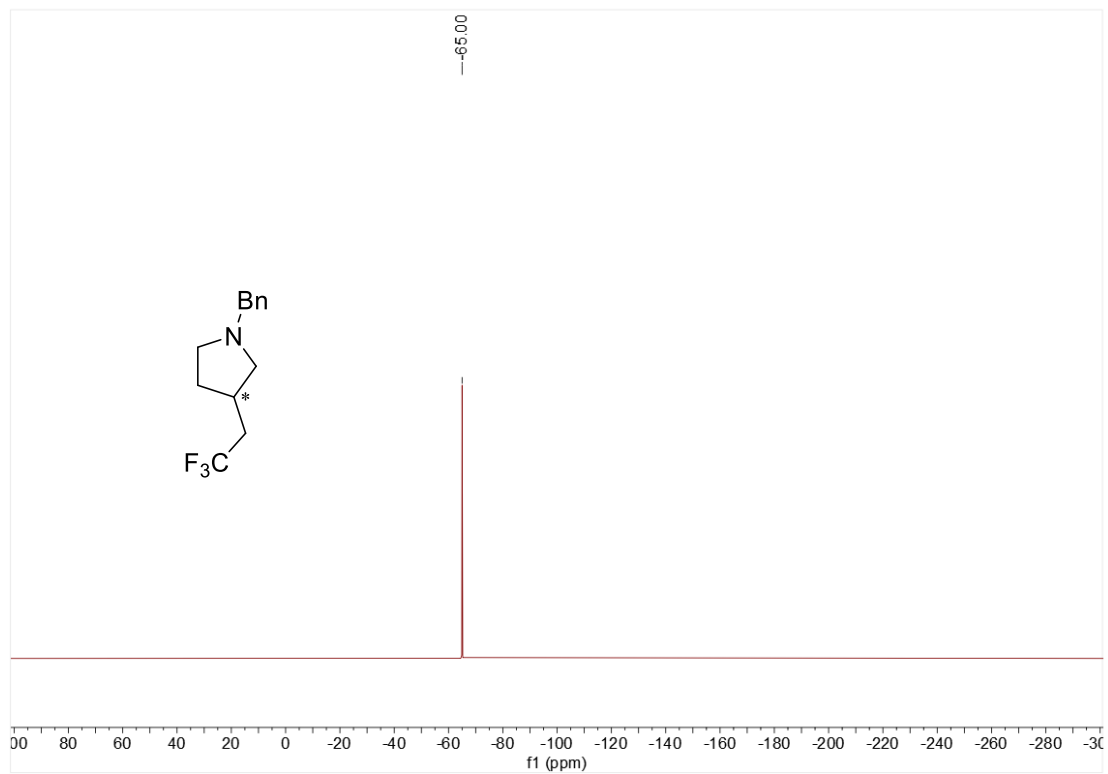

3-(2,2,2-trifluoroethyl)pyrrolidine hydrochloride (**8**)

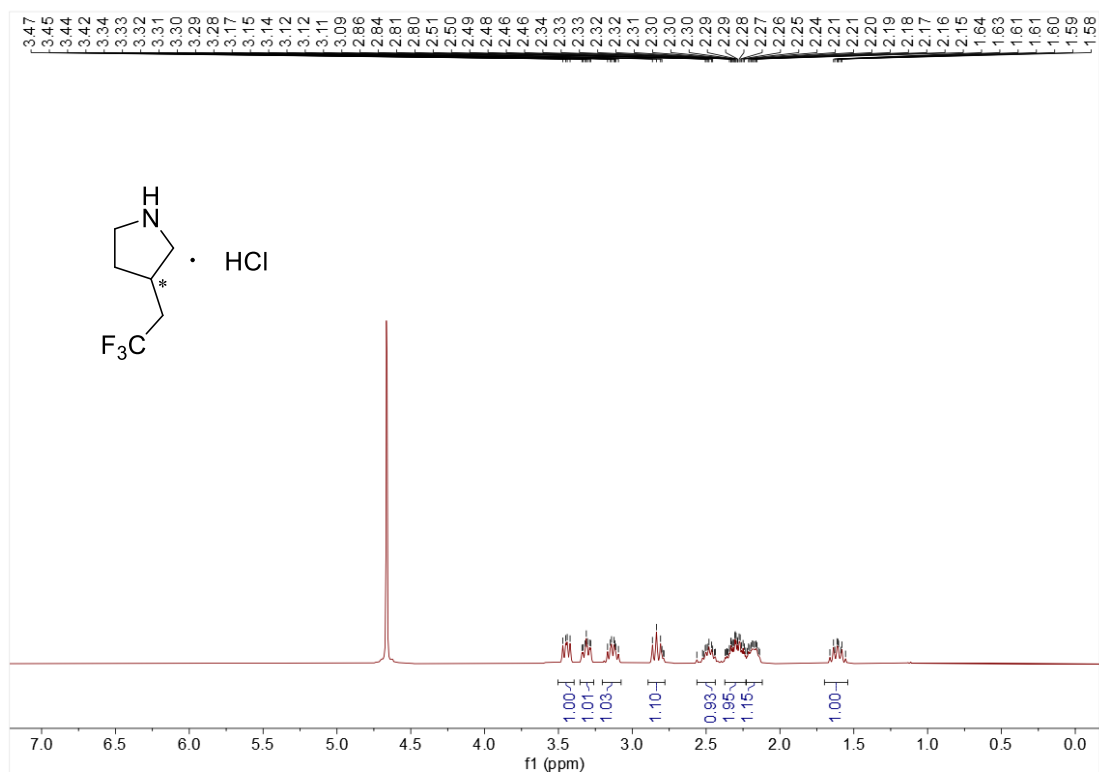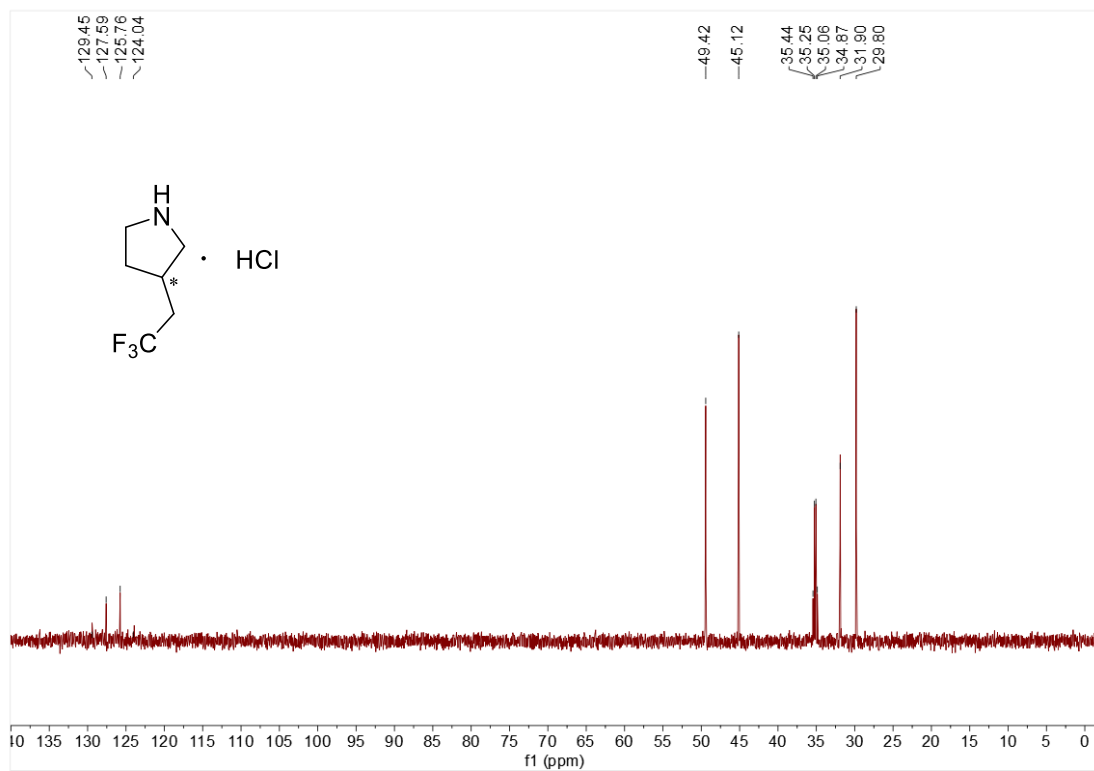

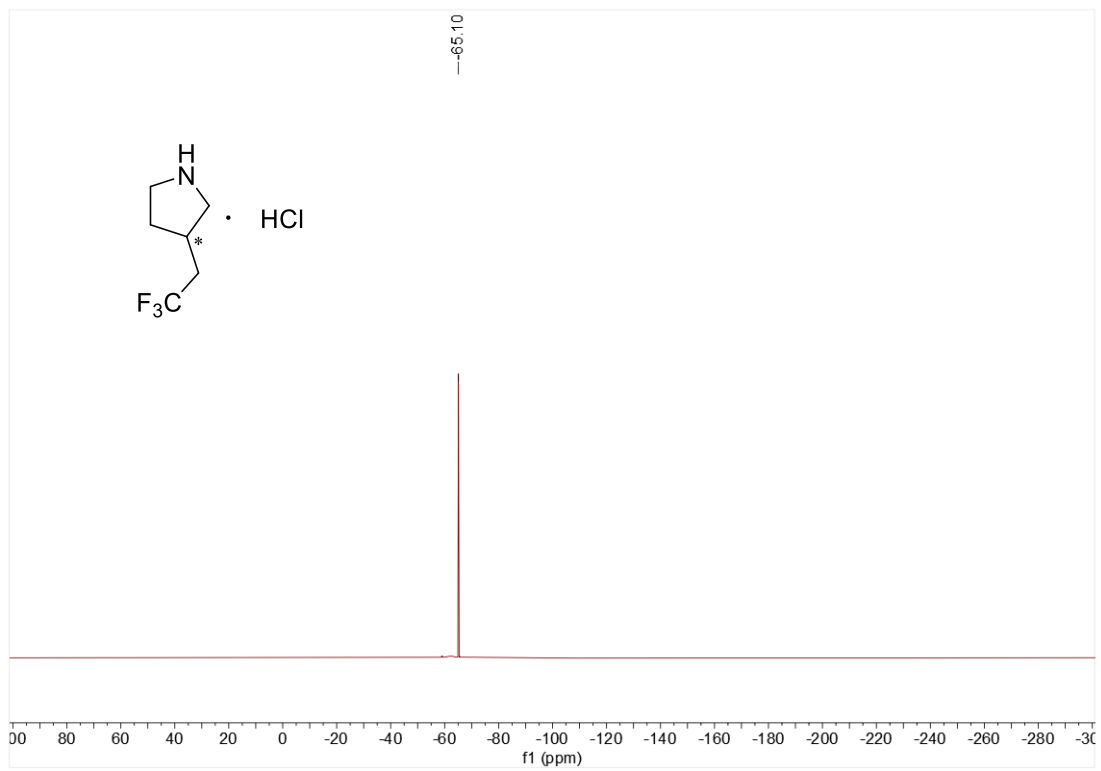

The  $^1\text{H}$  NMR of deuterium labeling experiments.

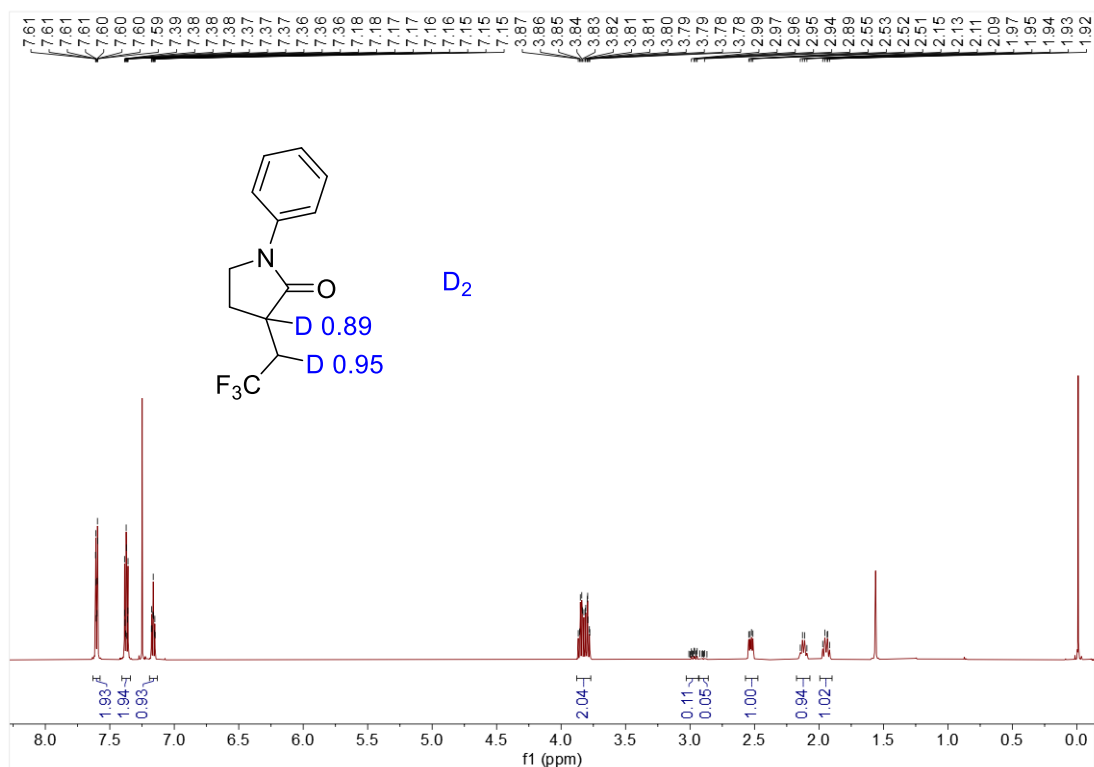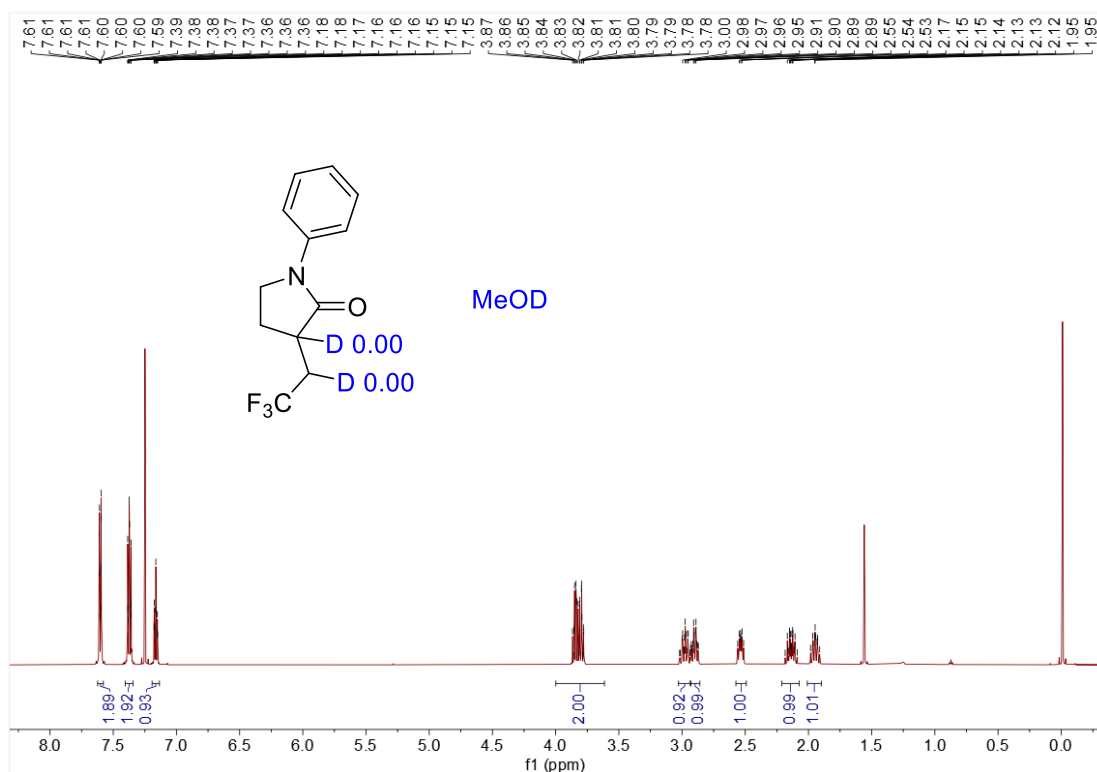

1-phenyl-3-(2,2,2-trifluoroethyl)pyrrolidin-2-one (**2a**)

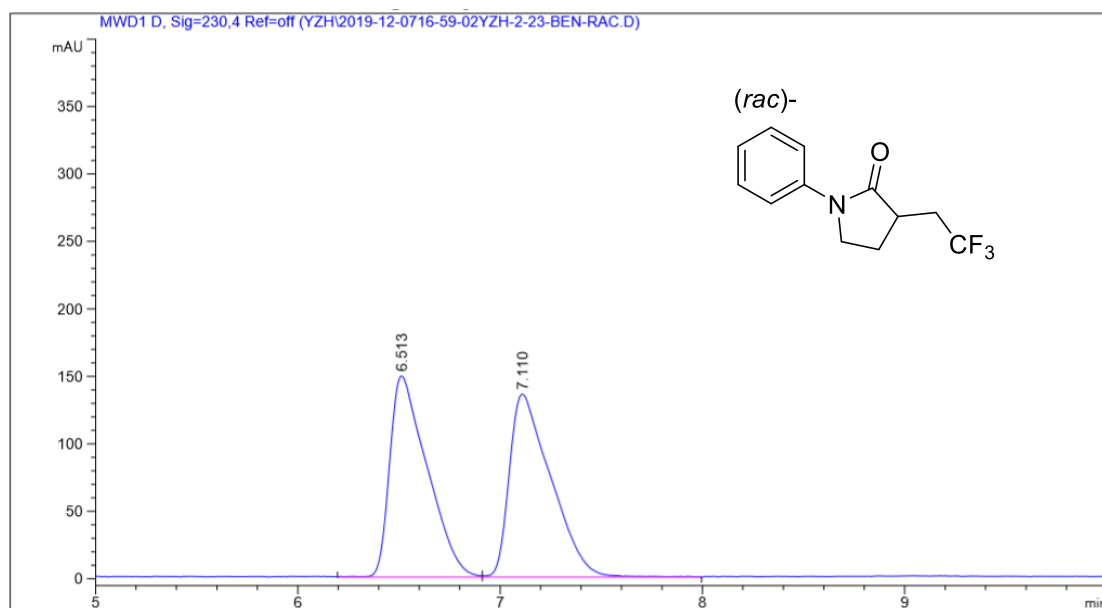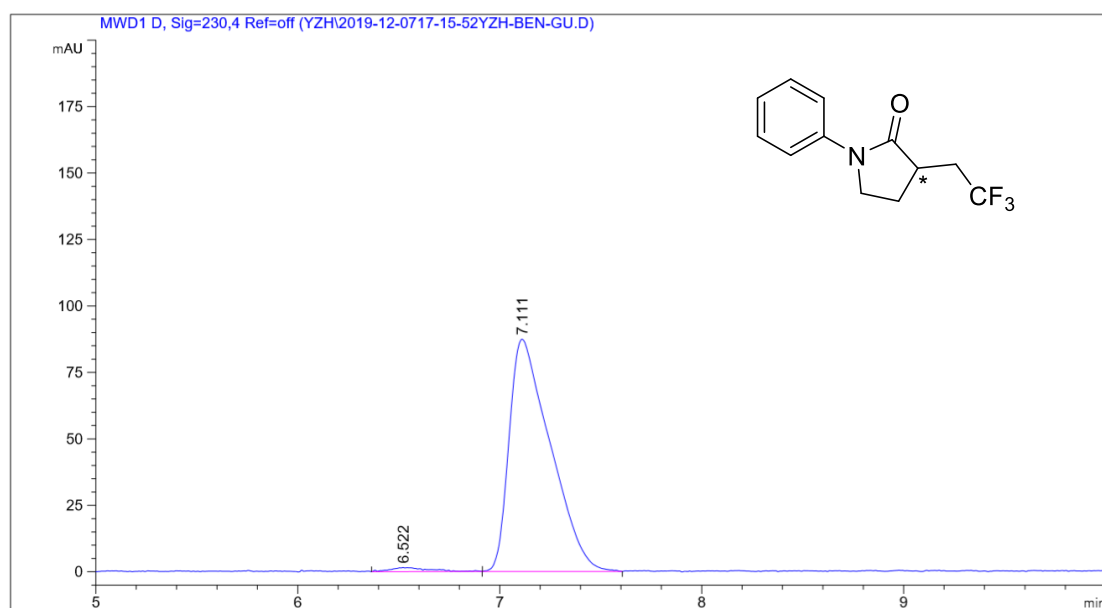

| Peak #   | RetTime [min] | Type | Width [min] | Area [mAU*s] | Height [mAU] | Area %  |
|----------|---------------|------|-------------|--------------|--------------|---------|
| 1        | 2.948         | VV R | 0.0425      | 91.31137     | 32.78270     | 1.4353  |
| 2        | 3.073         | VV R | 0.0489      | 6270.69873   | 1980.46948   | 98.5647 |
| Totals : |               |      |             | 6362.01010   | 2013.25218   |         |

1-(*m*-tolyl)-3-(2,2,2-trifluoroethyl) pyrrolidin-2-one (**2b**)

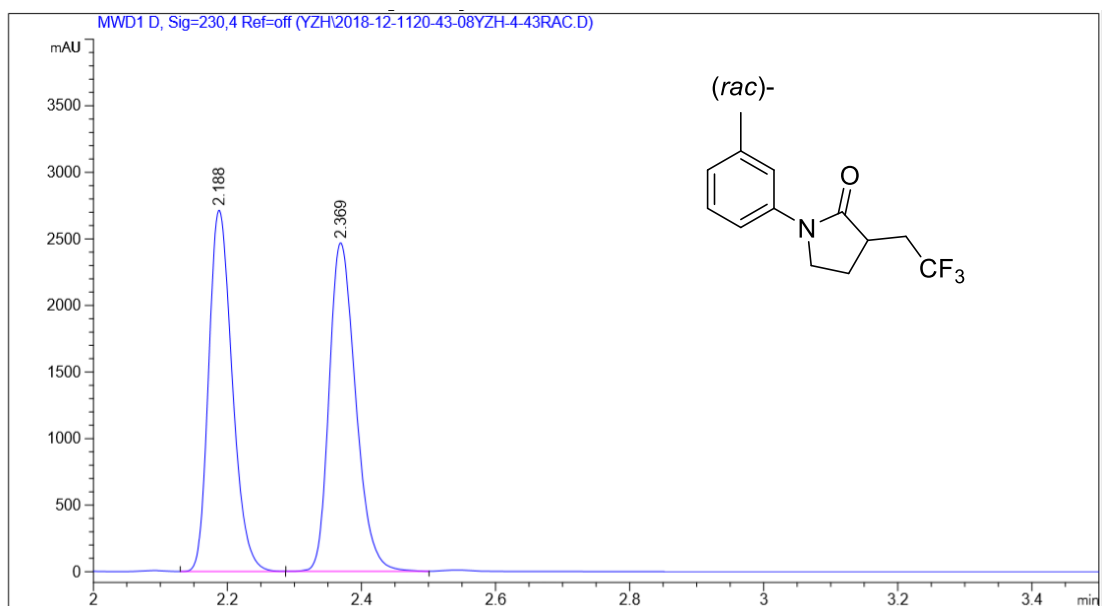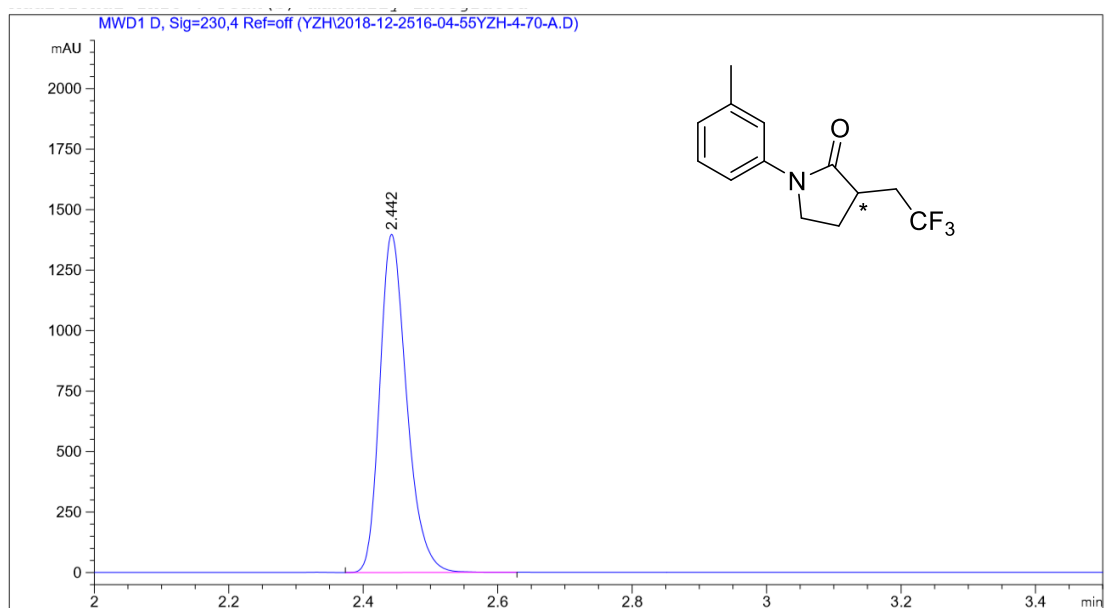

| Peak # | RetTime [min] | Type | Width [min] | Area [mAU*s] | Height [mAU] | Area %   |
|--------|---------------|------|-------------|--------------|--------------|----------|
| 1      | 2.442         | BV R | 0.0424      | 3883.56323   | 1398.43164   | 100.0000 |

Totals : 3883.56323 1398.43164

1-(3-methoxyphenyl)-3-(2,2,2-trifluoroethyl)pyrrolidin-2-one (**2c**)

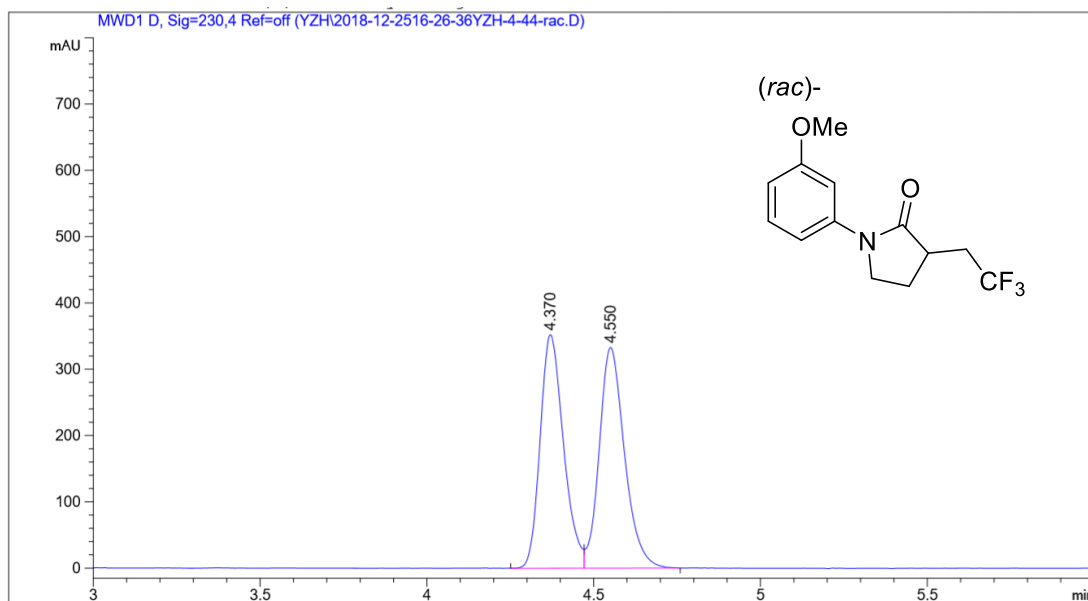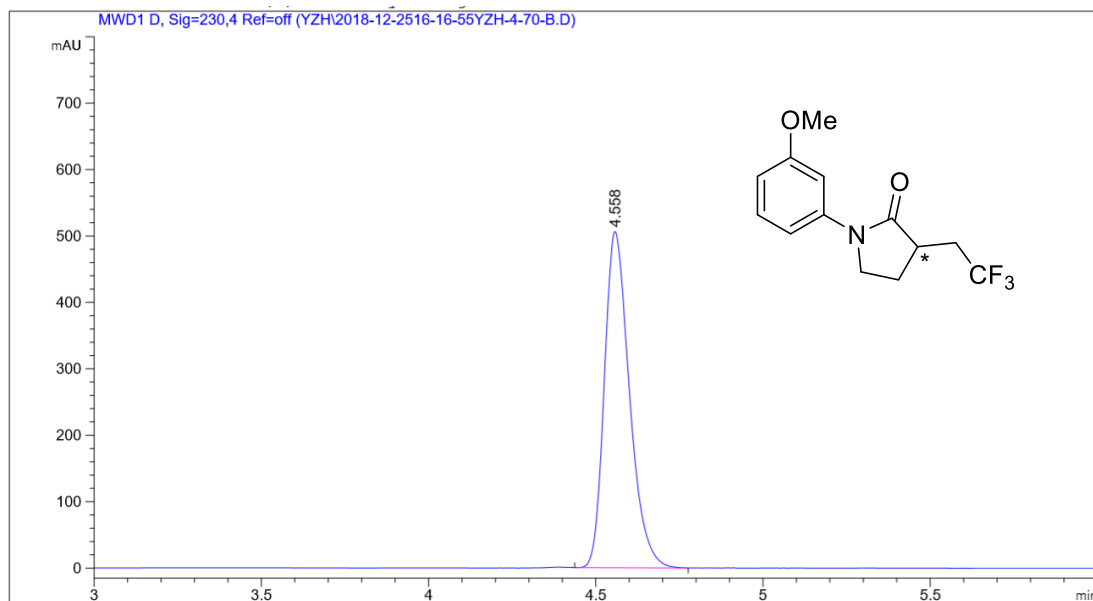

| Peak # | RetTime [min] | Type | Width [min] | Area [mAU*s] | Height [mAU] | Area %   |
|--------|---------------|------|-------------|--------------|--------------|----------|
| 1      | 4.558         | BB   | 0.0803      | 2638.98633   | 506.16745    | 100.0000 |

Totals : 2638.98633 506.16745



1-(*p*-tolyl)-3-(2,2,2-trifluoroethyl)pyrrolidin-2-one (**2d**)

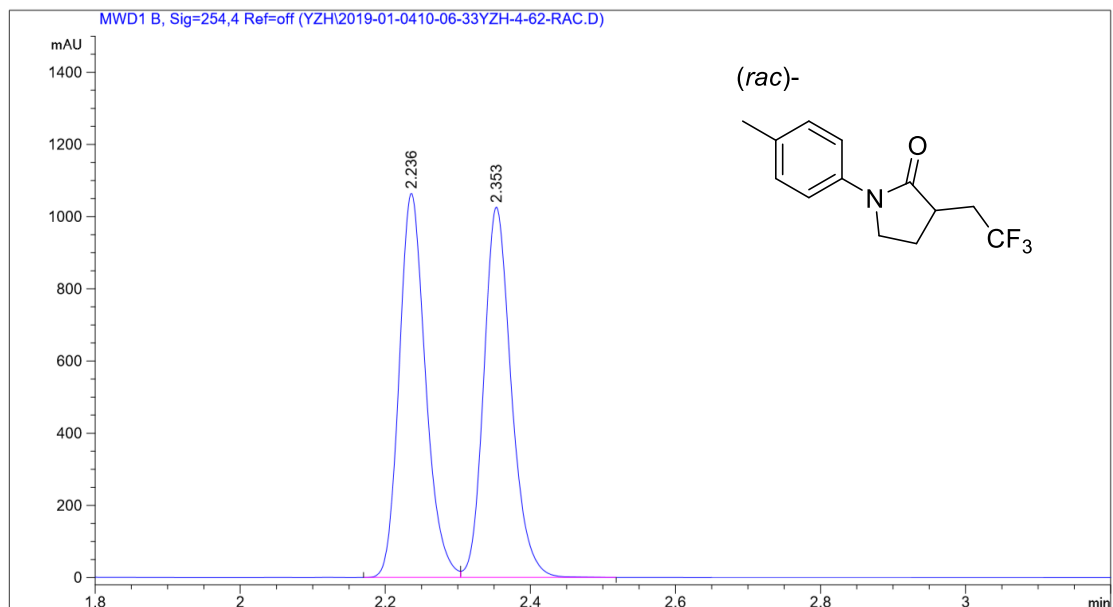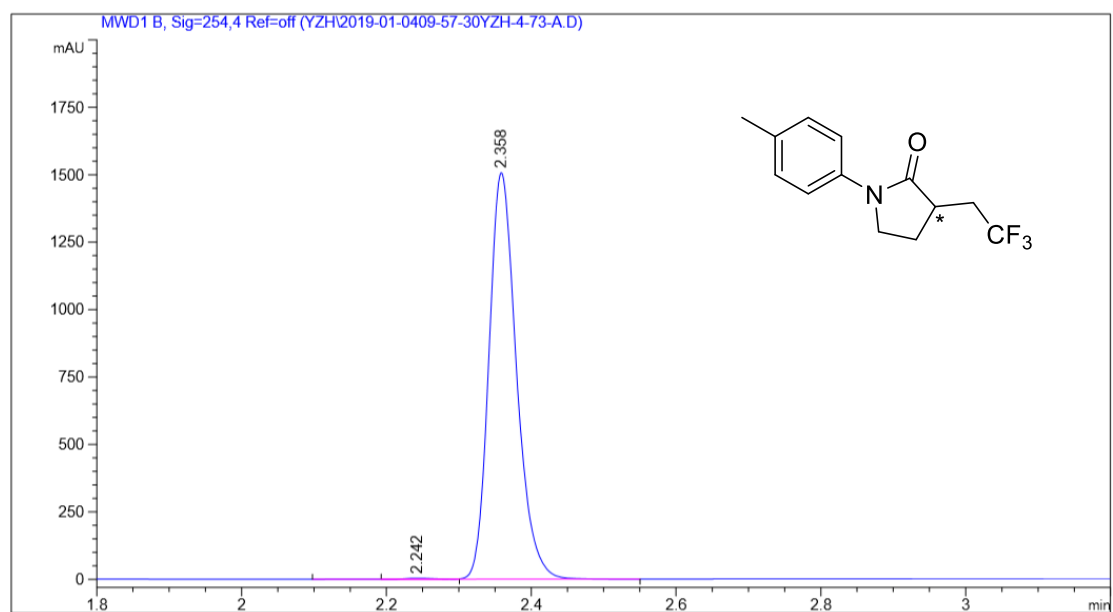

| Peak # | RetTime [min] | Type | Width [min] | Area [mAU*s] | Height [mAU] | Area %  |
|--------|---------------|------|-------------|--------------|--------------|---------|
| 1      | 2.242         | VV E | 0.0351      | 10.75305     | 4.24057      | 0.2694  |
| 2      | 2.358         | VV R | 0.0403      | 3980.28394   | 1507.89783   | 99.7306 |

Totals : 3991.03699 1512.13840

1-(4-methoxyphenyl)-3-(2,2,2-trifluoroethyl)pyrrolidin-2-one (**2e**)

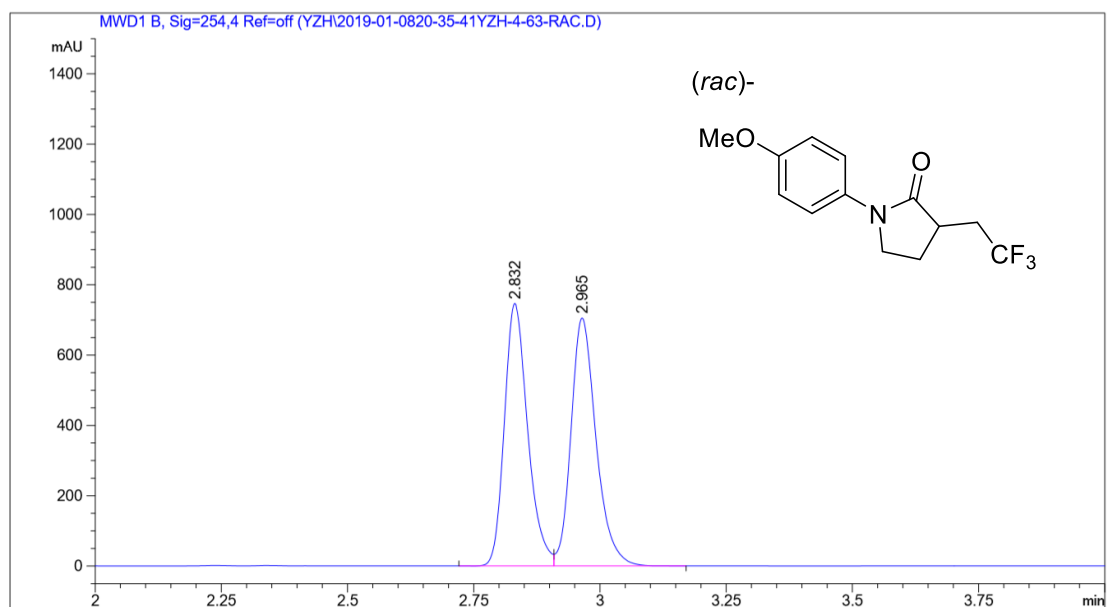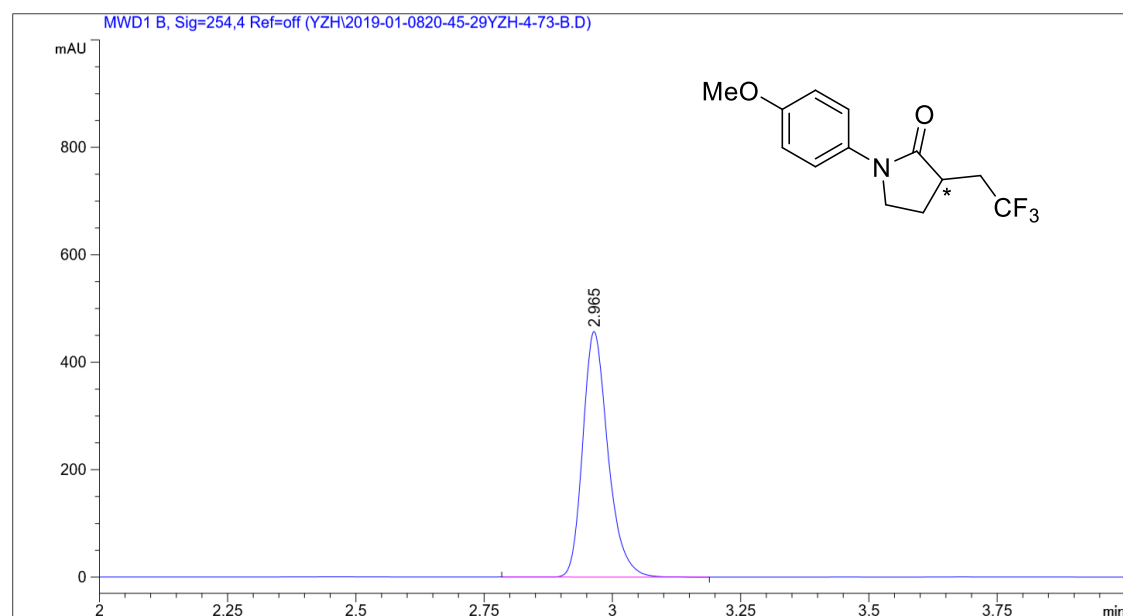

| Peak # | RetTime [min] | Type | Width [min] | Area [mAU*s] | Height [mAU] | Area %   |
|--------|---------------|------|-------------|--------------|--------------|----------|
| 1      | 2.965         | VV R | 0.0524      | 1564.96265   | 457.23709    | 100.0000 |

Totals : 1564.96265 457.23709

1-(3-fluorophenyl)-3-(2,2,2-trifluoroethyl)pyrrolidin-2-one (**2f**)

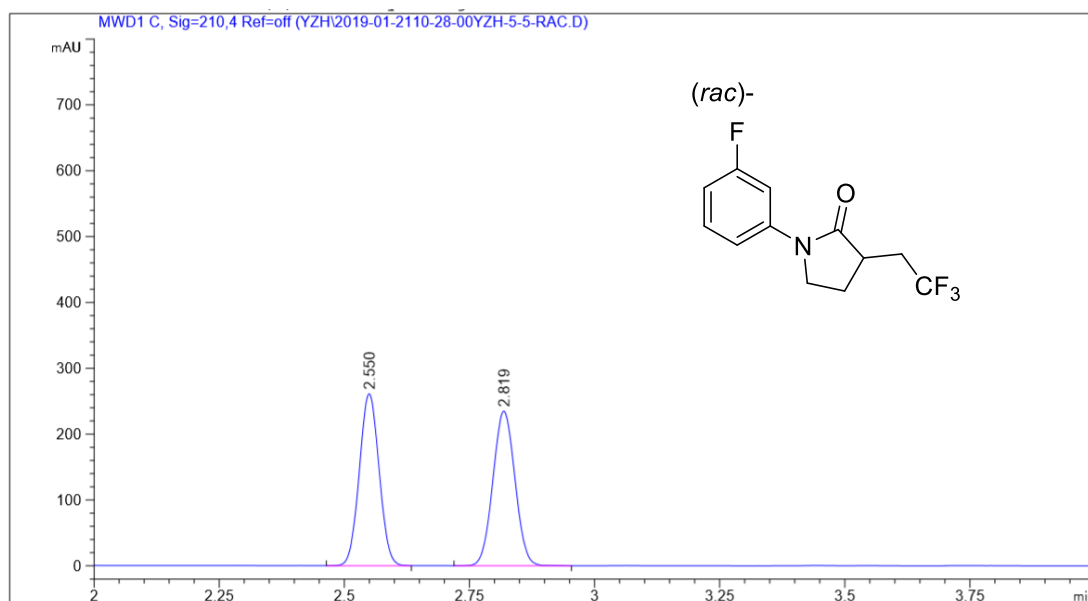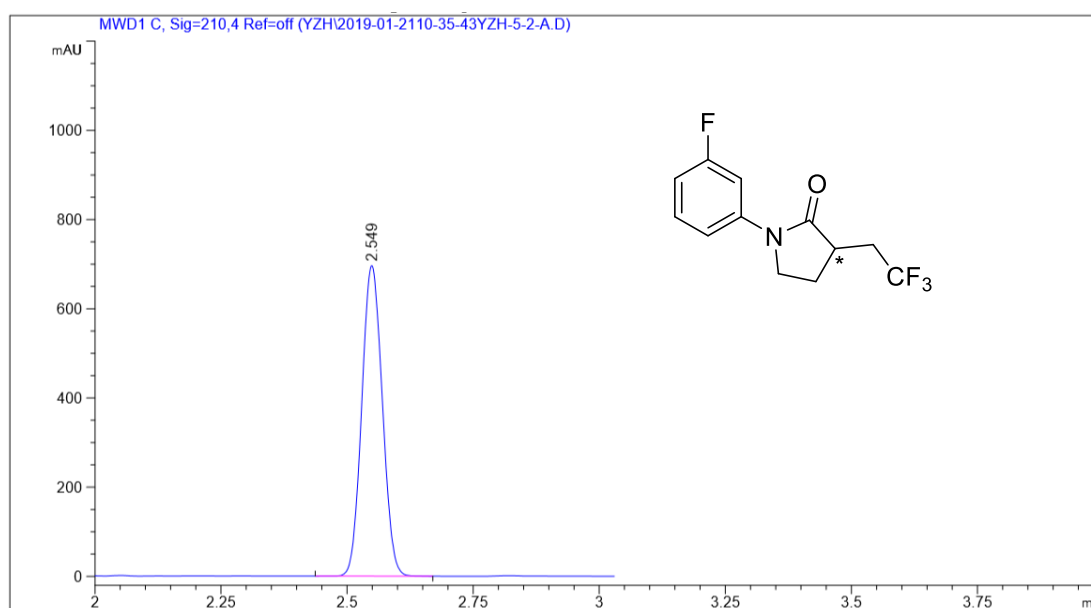

| Peak # | RetTime [min] | Type | Width [min] | Area [mAU*s] | Height [mAU] | Area %   |
|--------|---------------|------|-------------|--------------|--------------|----------|
| 1      | 2.549         | VV R | 0.0450      | 1971.38428   | 696.45831    | 100.0000 |

Totals : 1971.38428 696.45831

1-(4-fluorophenyl)-3-(2,2,2-trifluoroethyl)pyrrolidin-2-one (**2g**)

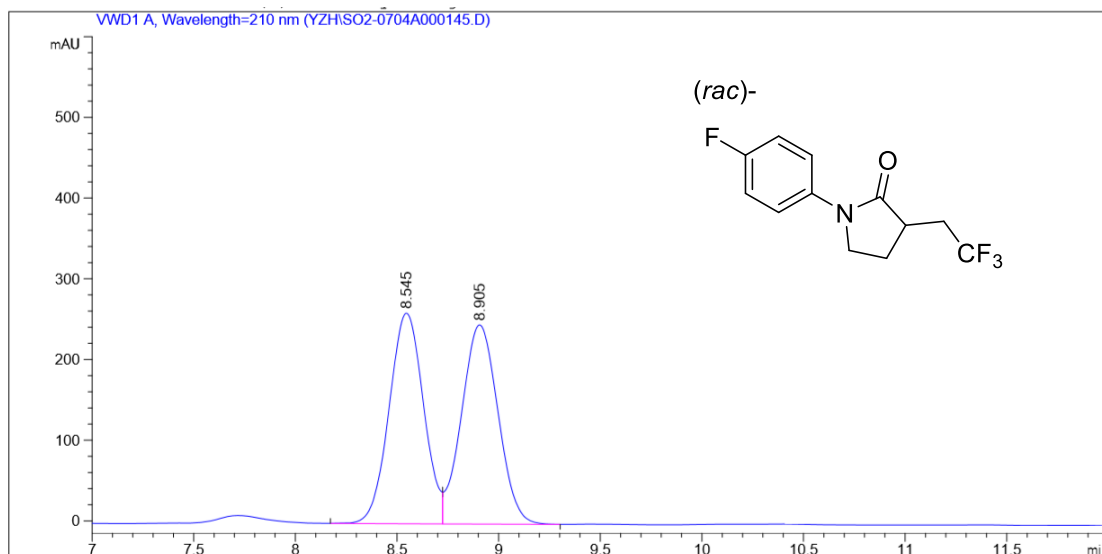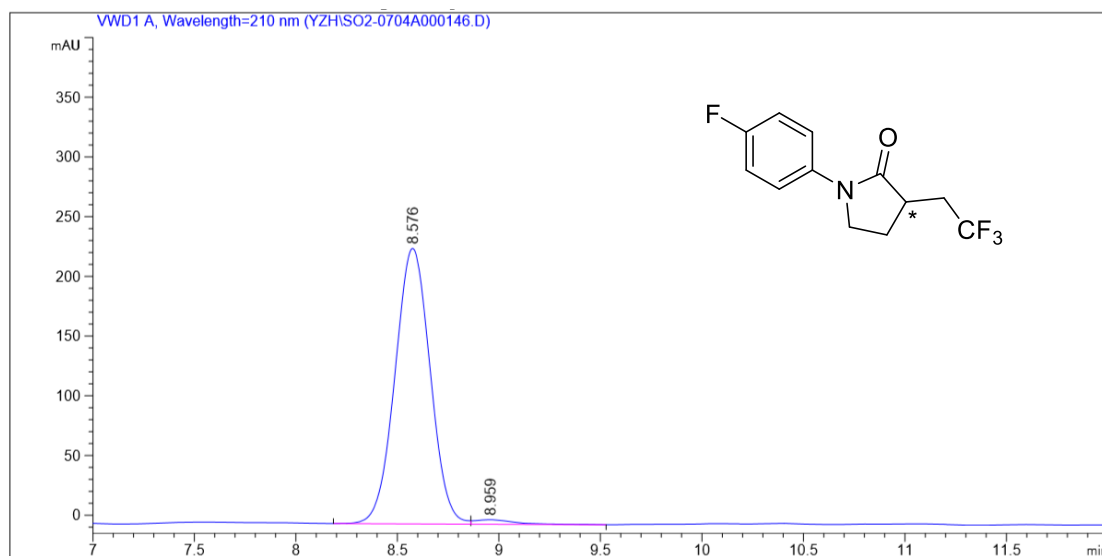

| Peak #   | RetTime [min] | Type | Width [min] | Area [mAU*s] | Height [mAU] | Area %  |
|----------|---------------|------|-------------|--------------|--------------|---------|
| 1        | 8.576         | BV   | 0.1882      | 2772.76611   | 230.71695    | 98.1103 |
| 2        | 8.959         | VB   | 0.2075      | 53.40612     | 3.78834      | 1.8897  |
| Totals : |               |      |             | 2826.17224   | 234.50529    |         |

1-(3-bromophenyl)-3-(2,2,2-trifluoroethyl)pyrrolidin-2-one (**2h**)

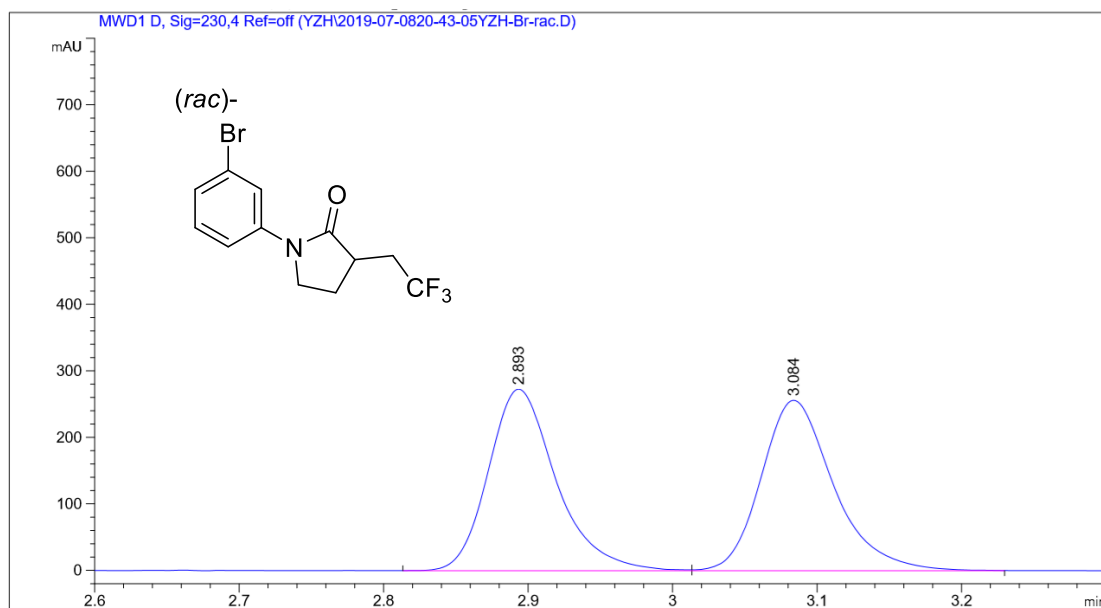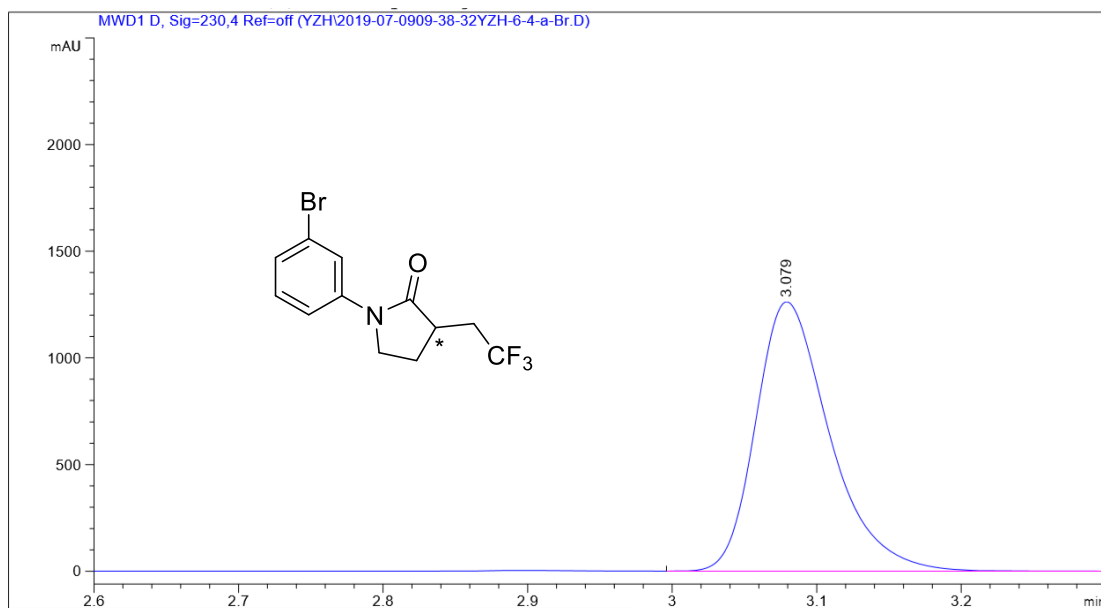

| Peak # | RetTime [min] | Type | Width [min] | Area [mAU*s] | Height [mAU] | Area %   |
|--------|---------------|------|-------------|--------------|--------------|----------|
| 1      | 3.079         | BV R | 0.0539      | 4476.41650   | 1262.87476   | 100.0000 |

Totals : 4476.41650 1262.87476

1-(4-(*tert*-butyl)phenyl)-3-(2,2,2-trifluoroethyl)pyrrolidin-2-one (**2i**)

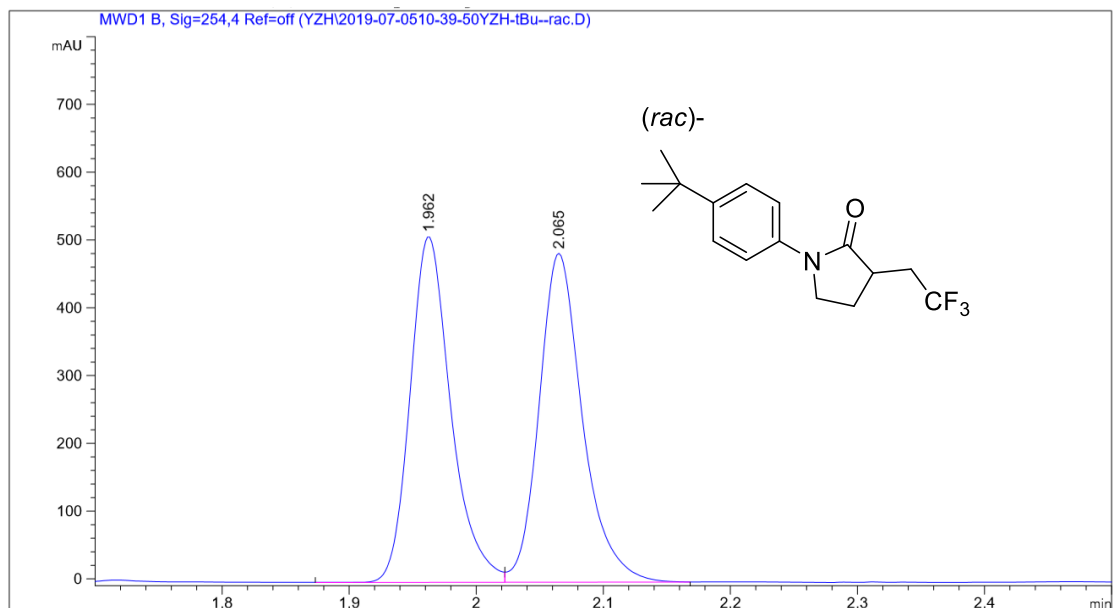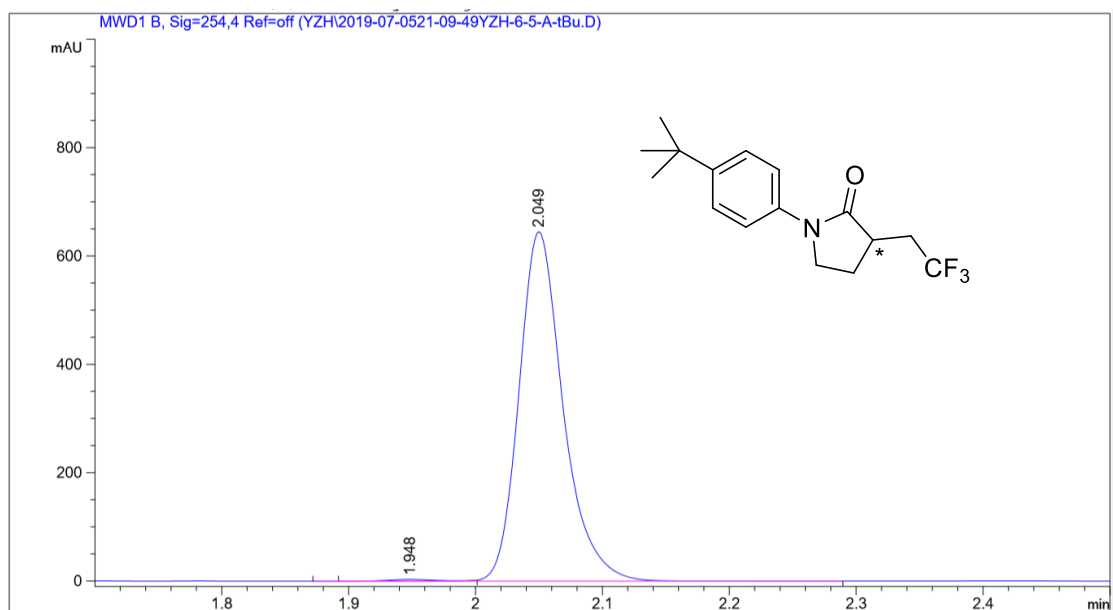

| Peak #   | RetTime [min] | Type | Width [min] | Area [mAU*s] | Height [mAU] | Area %  |
|----------|---------------|------|-------------|--------------|--------------|---------|
| 1        | 1.948         | VV E | 0.0381      | 8.32995      | 3.23315      | 0.5321  |
| 2        | 2.049         | VV R | 0.0366      | 1557.14990   | 645.38452    | 99.4679 |
| Totals : |               |      |             | 1565.47985   | 648.61767    |         |

1-(3-nitrophenyl)-3-(2,2,2-trifluoroethyl)pyrrolidin-2-one (**2j**)

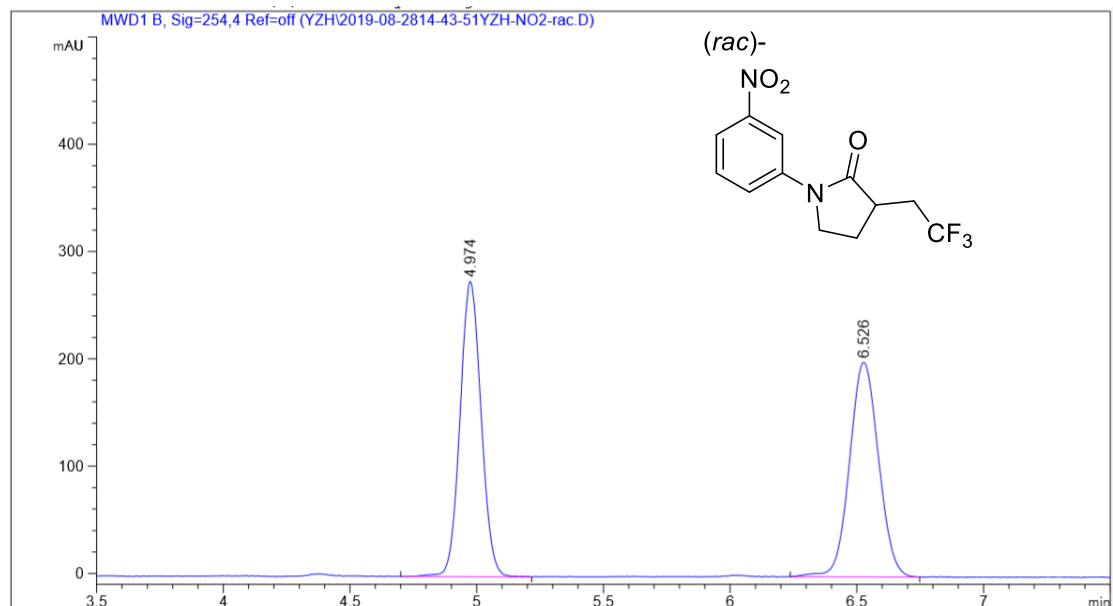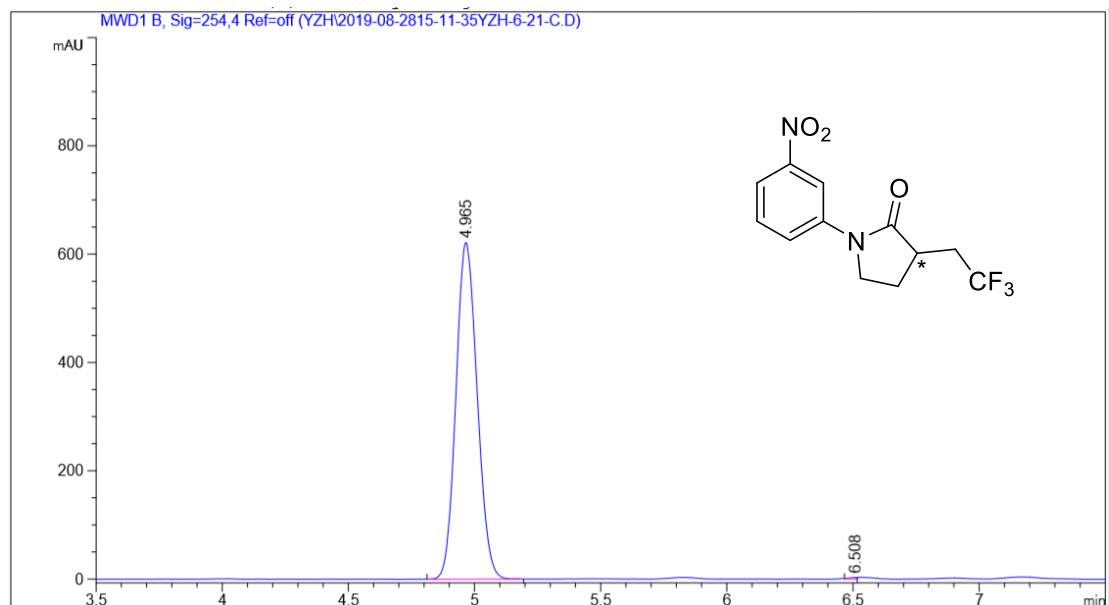

| Peak #   | RetTime [min] | Type | Width [min] | Area [mAU*s] | Height [mAU] | Area %  |
|----------|---------------|------|-------------|--------------|--------------|---------|
| 1        | 4.965         | BV R | 0.0917      | 3632.43018   | 621.70306    | 99.8243 |
| 2        | 6.508         | VV   | 0.0294      | 6.39376      | 2.93935      | 0.1757  |
| Totals : |               |      |             | 3638.82394   | 624.64241    |         |

1-(3,5-dimethylphenyl)-3-(2,2,2-trifluoroethyl)pyrrolidin-2-one (**2k**)

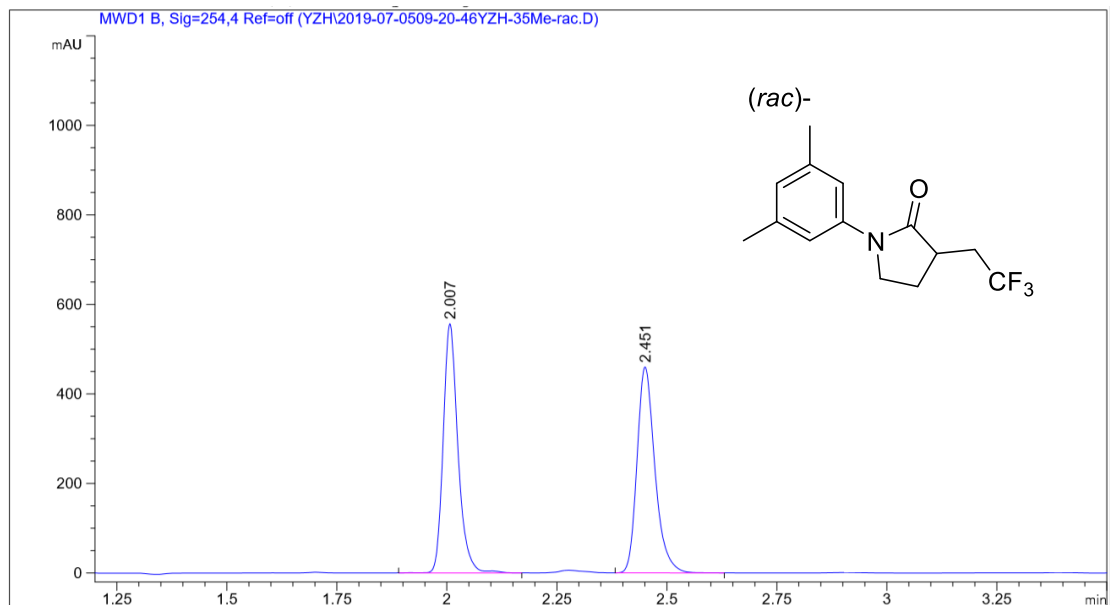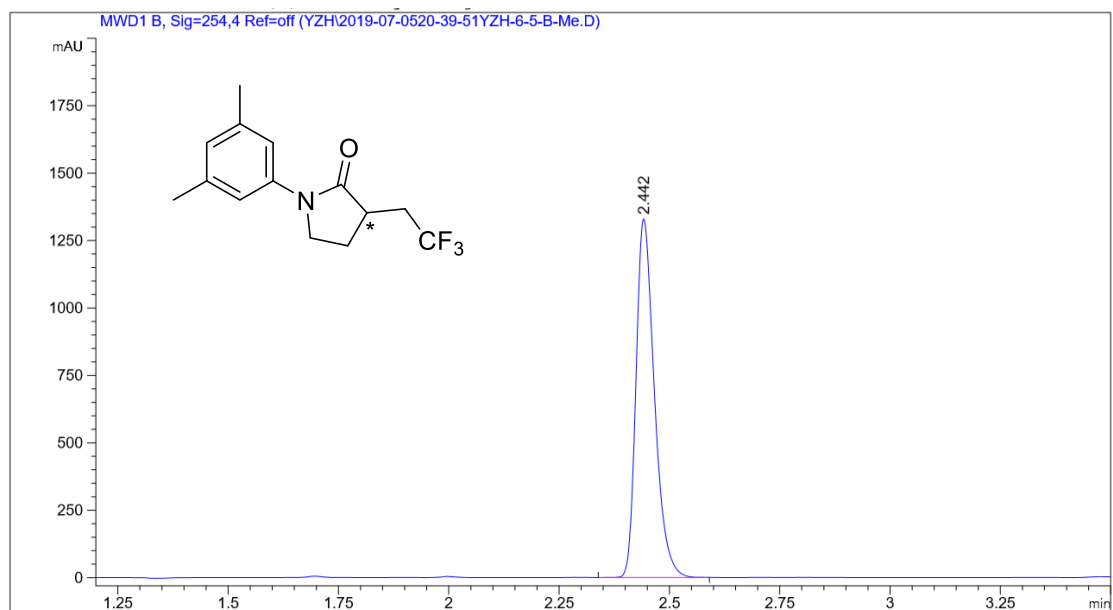

| Peak # | RetTime [min] | Type | Width [min] | Area [mAU*s] | Height [mAU] | Area %   |
|--------|---------------|------|-------------|--------------|--------------|----------|
| 1      | 2.442         | VV R | 0.0446      | 3834.03589   | 1330.37695   | 100.0000 |

Totals : 3834.03589 1330.37695



1-(3,4-dimethylphenyl)-3-(2,2,2-trifluoroethyl)pyrrolidin-2-one (**21**)

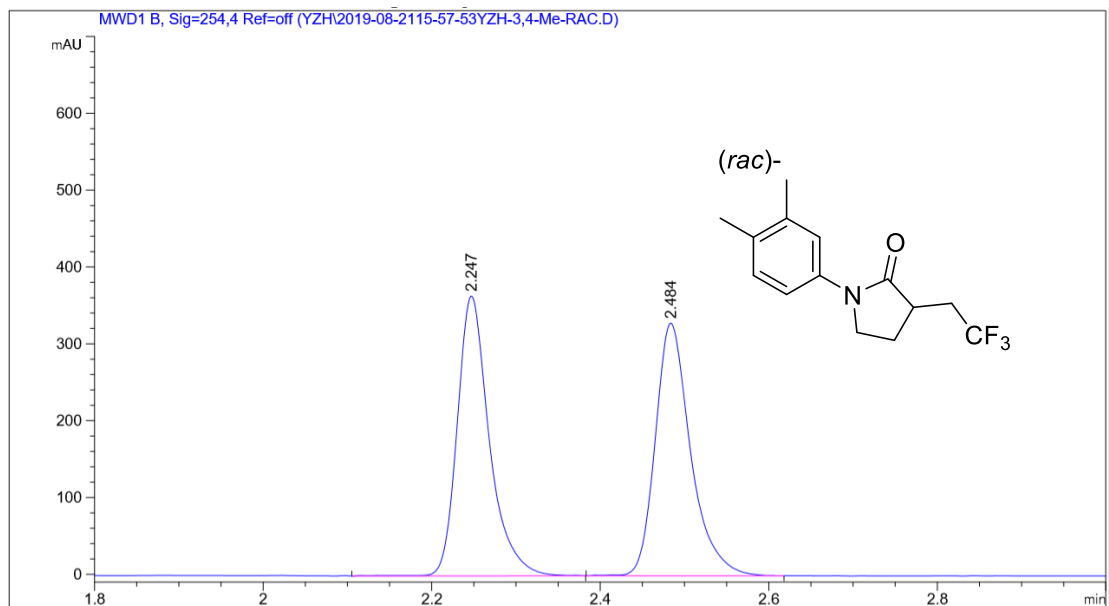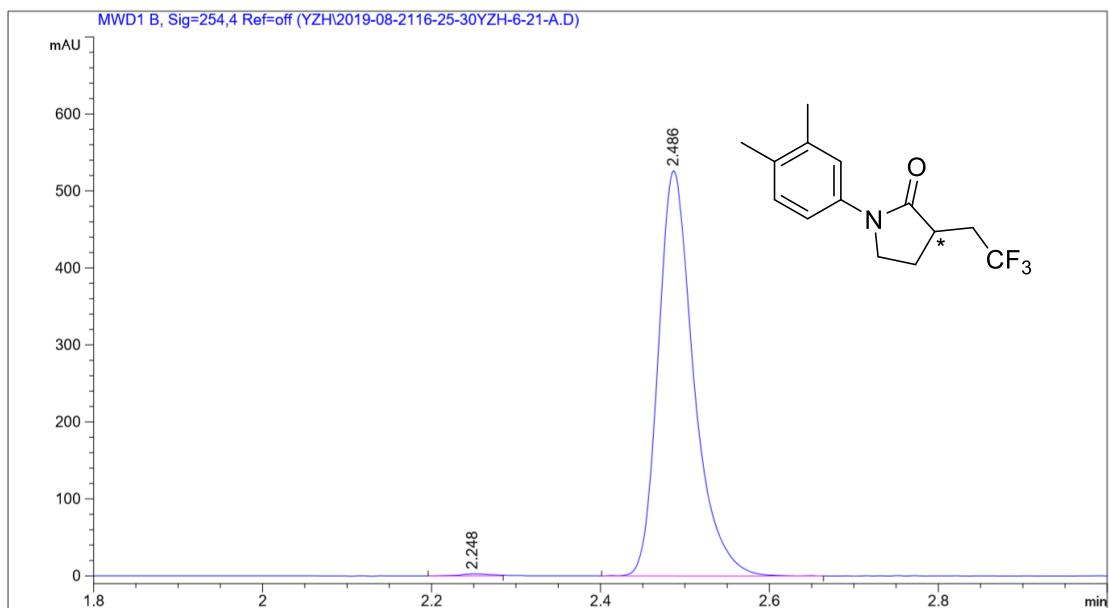

| Peak # | RetTime [min] | Type | Width [min] | Area [mAU*s] | Height [mAU] | Area %  |
|--------|---------------|------|-------------|--------------|--------------|---------|
| 1      | 2.248         | VV R | 0.0306      | 6.51410      | 2.75706      | 0.4218  |
| 2      | 2.486         | VV R | 0.0441      | 1537.92639   | 526.55475    | 99.5782 |

Totals : 1544.44049 529.31180

1-(3,5-dimethoxyphenyl)-3-(2,2,2-trifluoroethyl)pyrrolidin-2-one (**2m**)

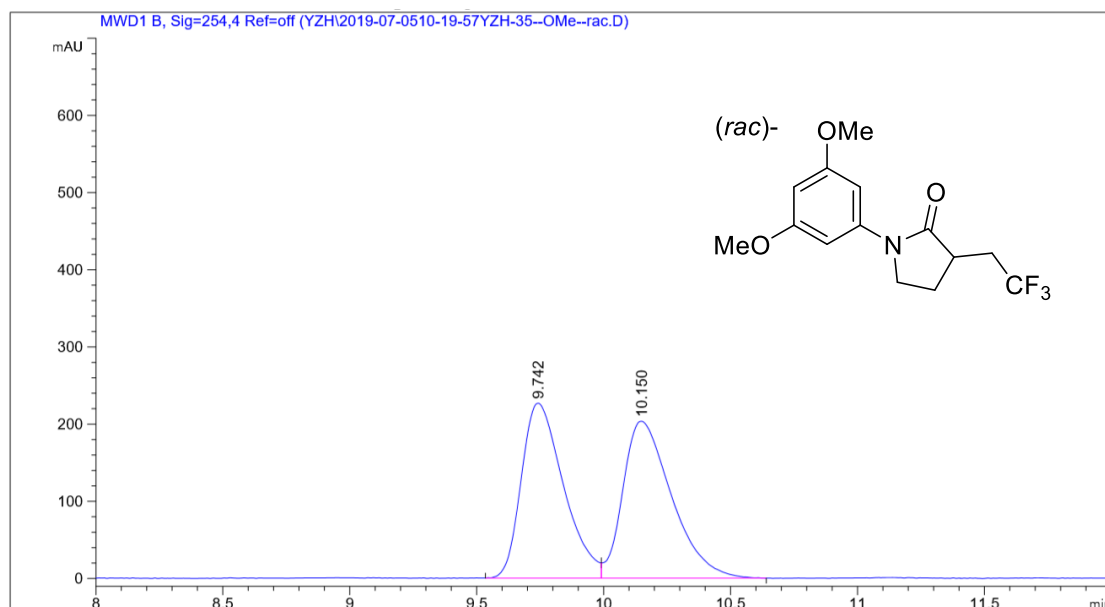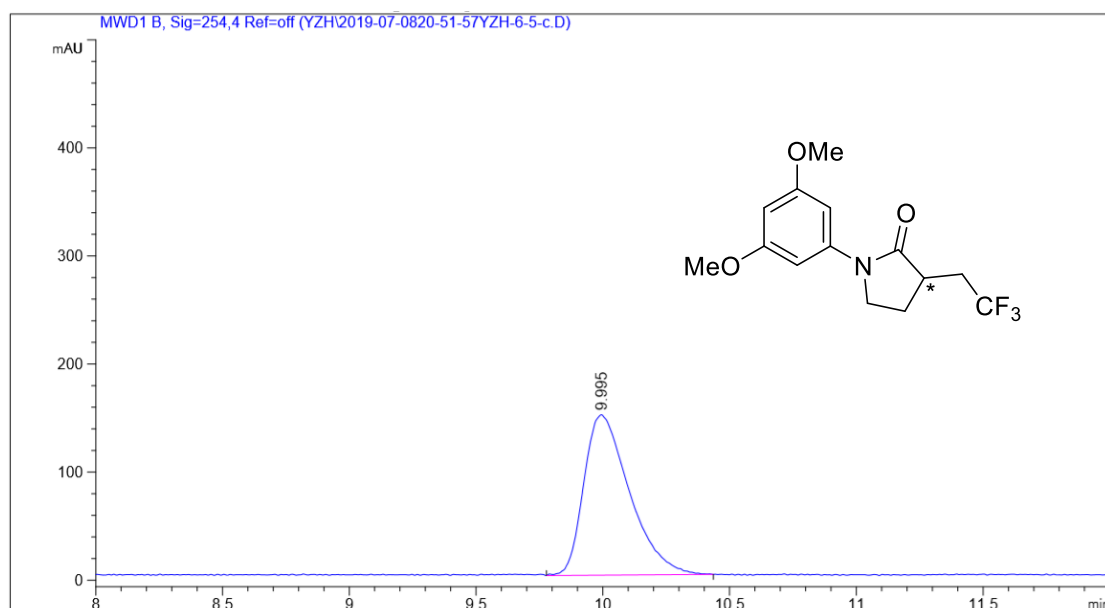

| Peak # | RetTime [min] | Type | Width [min] | Area [mAU*s] | Height [mAU] | Area %   |
|--------|---------------|------|-------------|--------------|--------------|----------|
| 1      | 9.995         | VV R | 0.1524      | 1857.11304   | 148.46355    | 100.0000 |

Totals : 1857.11304 148.46355

1-(3,5-dichlorophenyl)-3-(2,2,2-trifluoroethyl)pyrrolidin-2-one (**2n**)

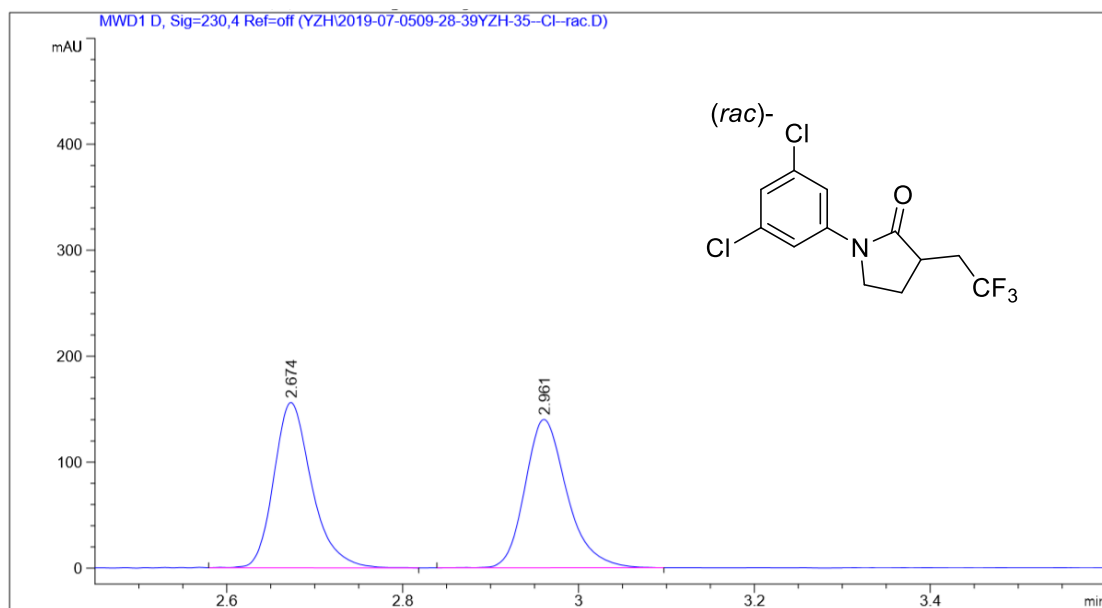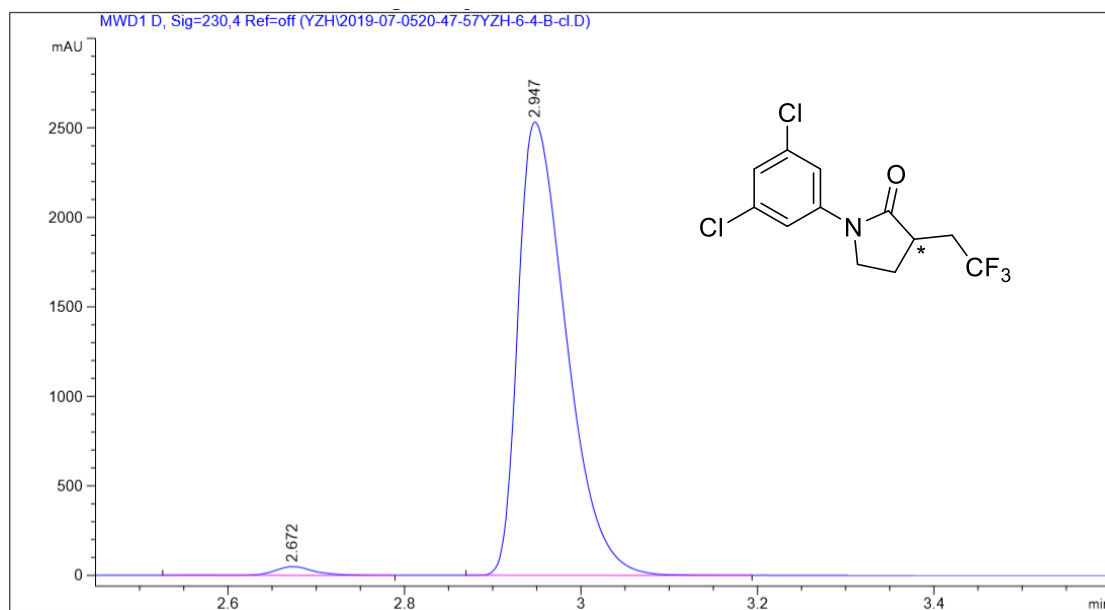

| Peak # | RetTime [min] | Type | Width [min] | Area [mAU*s] | Height [mAU] | Area %  |
|--------|---------------|------|-------------|--------------|--------------|---------|
| 1      | 2.672         | VV R | 0.0462      | 149.30211    | 48.76148     | 1.5341  |
| 2      | 2.947         | BV R | 0.0586      | 9583.18945   | 2532.50488   | 98.4659 |

Totals : 9732.49156 2581.26636

1-(3,4-dichlorophenyl)-3-(2,2,2-trifluoroethyl)pyrrolidin-2-one (**2o**)

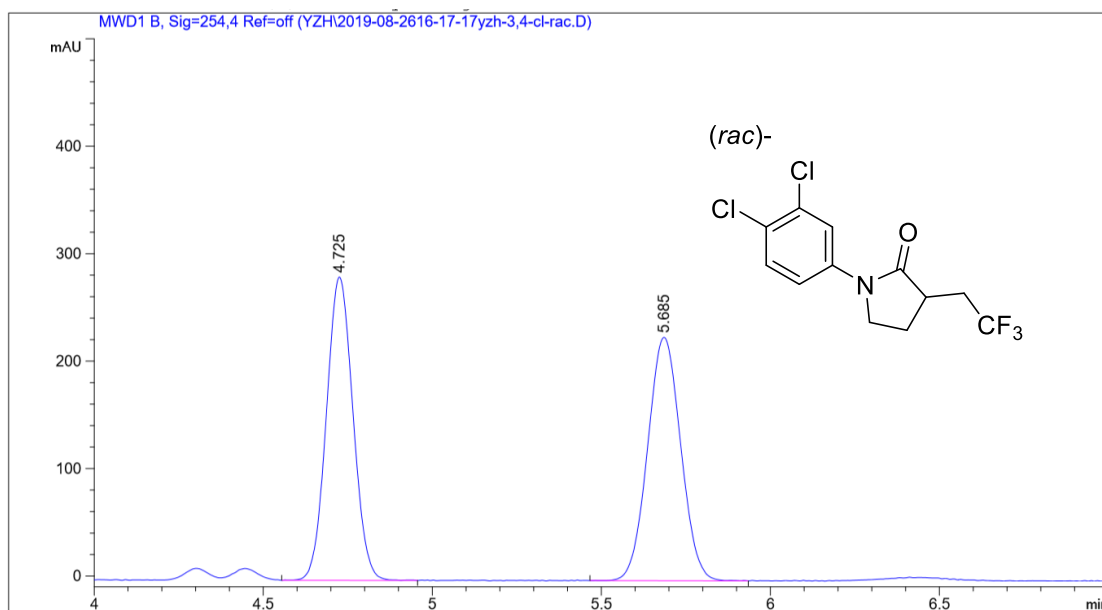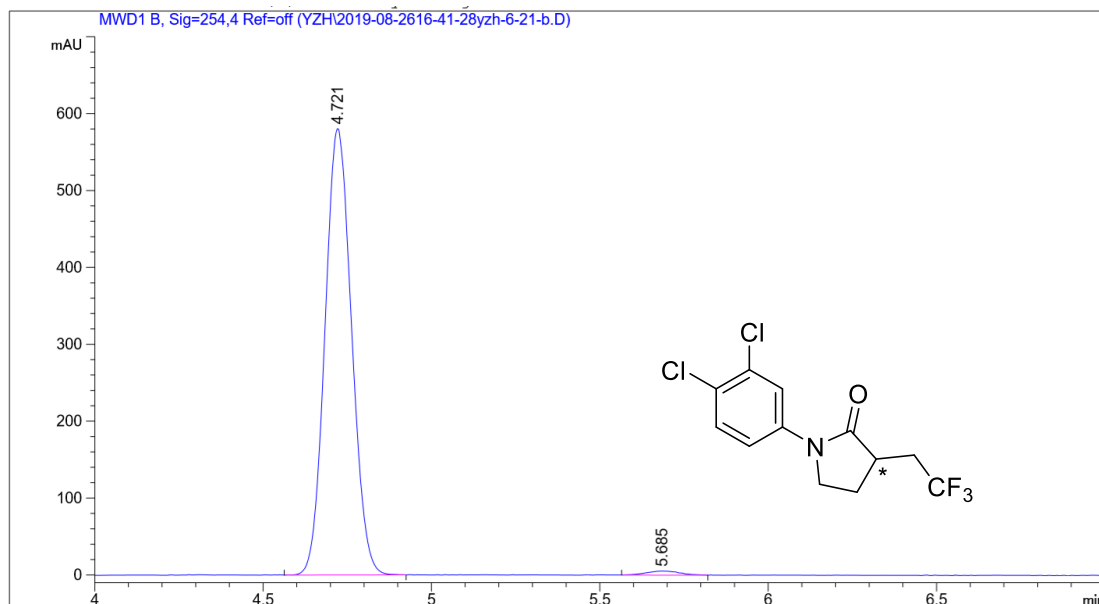

| Peak # | RetTime [min] | Type | Width [min] | Area [mAU*s] | Height [mAU] | Area %  |
|--------|---------------|------|-------------|--------------|--------------|---------|
| 1      | 4.721         | VV R | 0.0854      | 3179.20581   | 580.57288    | 98.8601 |
| 2      | 5.685         | BV R | 0.0839      | 36.65637     | 5.41821      | 1.1399  |

Totals : 3215.86218 585.99109

1-(naphthalen-1-yl)-3-(2,2,2-trifluoroethyl)pyrrolidin-2-one (**2p**)

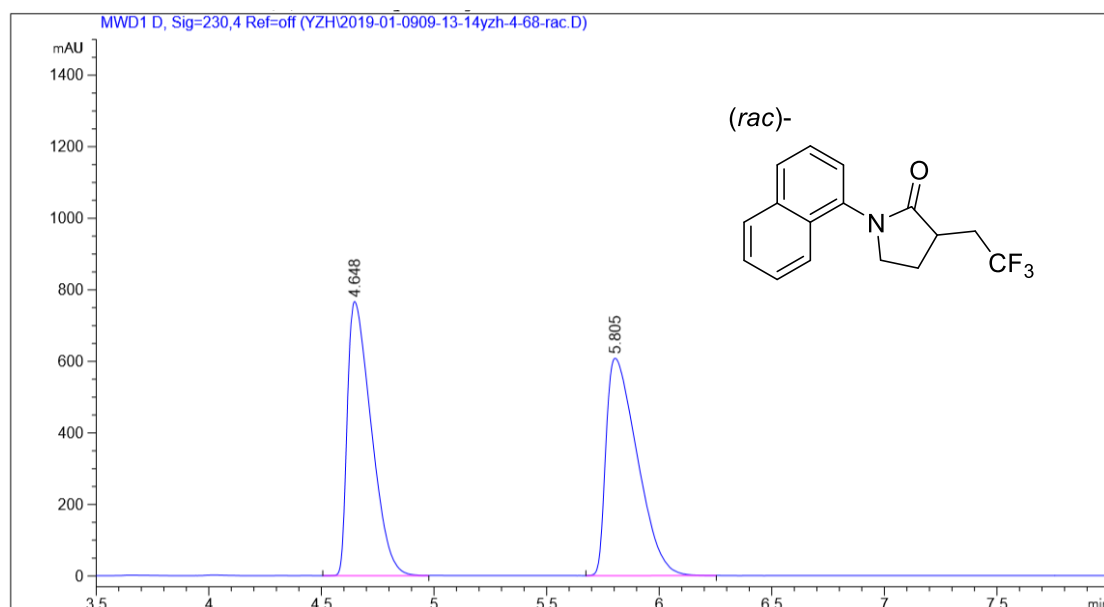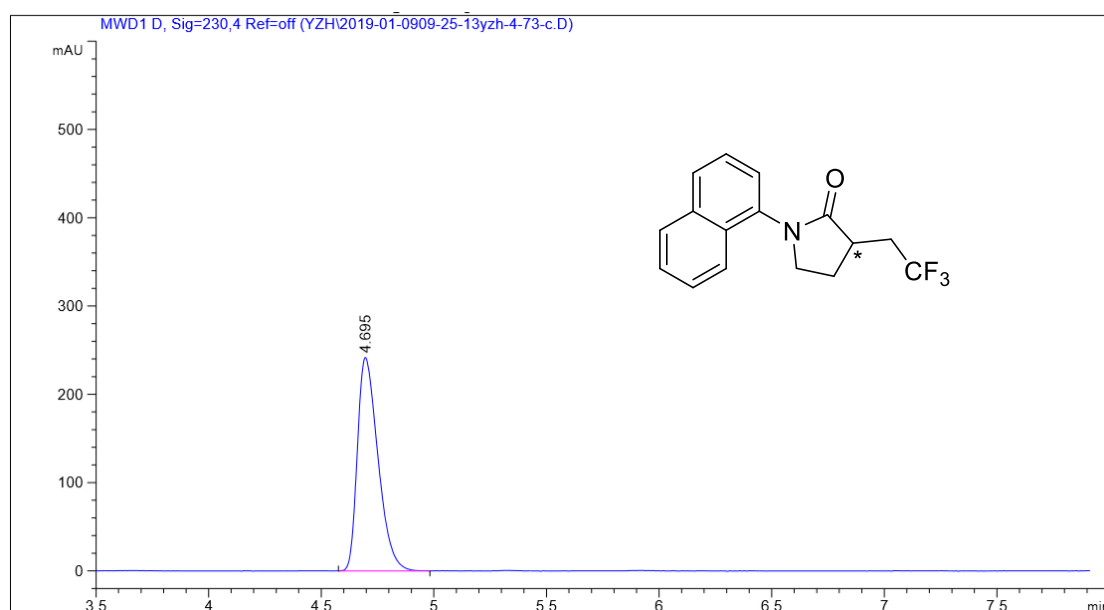

| Peak # | RetTime [min] | Type | Width [min] | Area [mAU*s] | Height [mAU] | Area %   |
|--------|---------------|------|-------------|--------------|--------------|----------|
| 1      | 4.695         | BV R | 0.0987      | 1537.27405   | 241.86537    | 100.0000 |

Totals : 1537.27405 241.86537

1-methyl-3-(2,2,2-trifluoroethyl)pyrrolidin-2-one (**2q**)

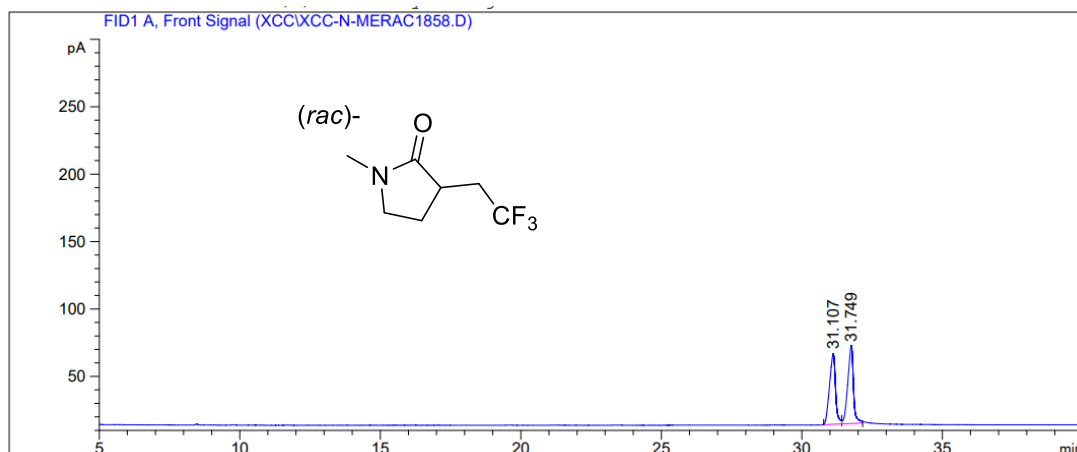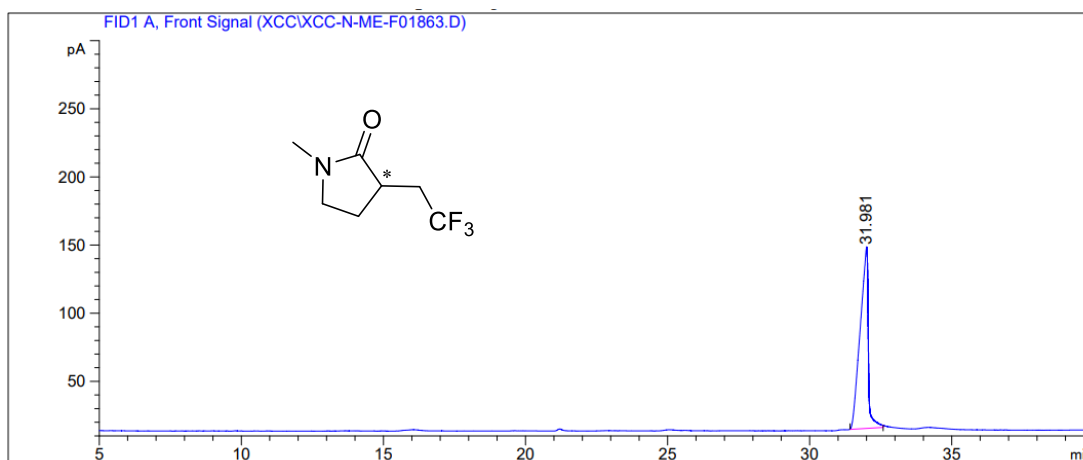

| Peak # | RetTime [min] | Type | Width [min] | Area [pA*s] | Height [pA] | Area %  |
|--------|---------------|------|-------------|-------------|-------------|---------|
| 1      | 31.981        | BB   | 0.3077      | 2670.02979  | 131.27904   | 1.000e2 |

Totals : 2670.02979 131.27904

1-benzyl-3-(2,2,2-trifluoroethyl)pyrrolidin-2-one (**2r**)

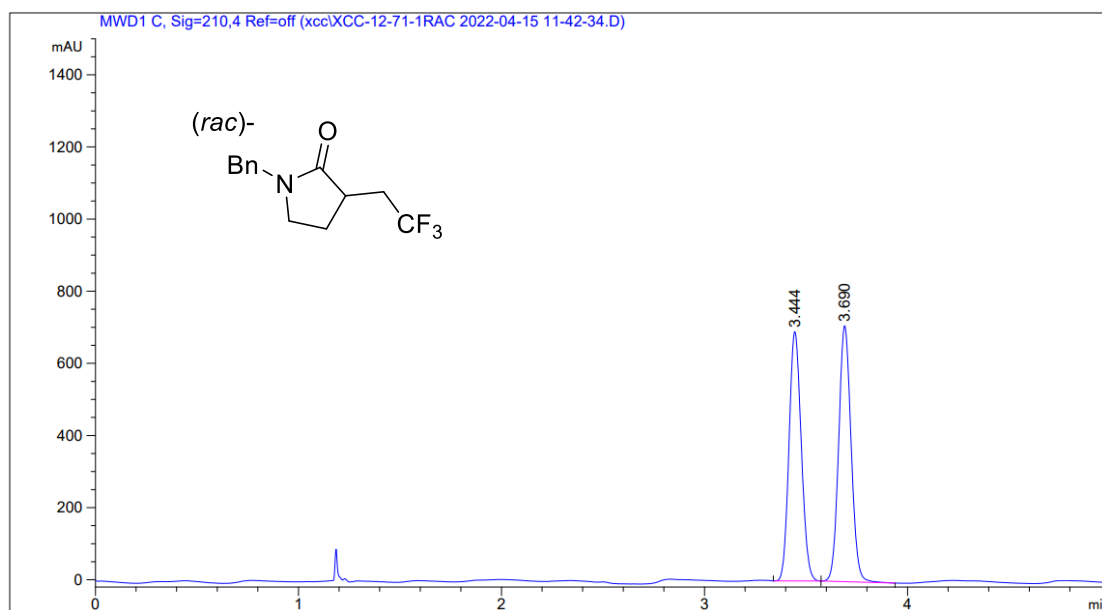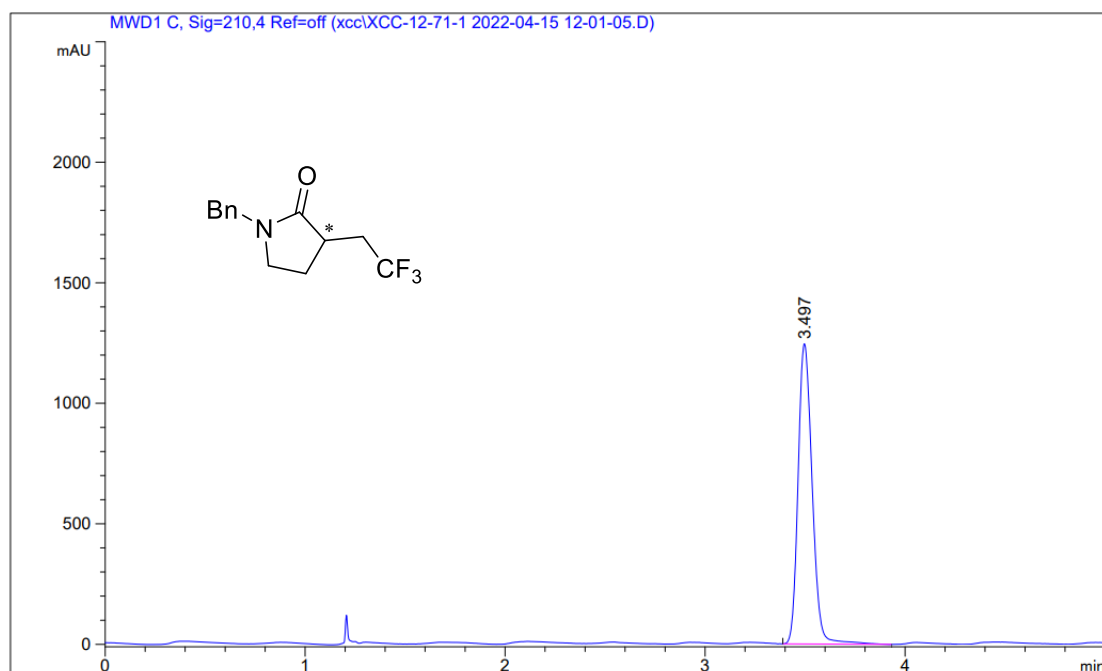

| Peak # | RetTime [min] | Type | Width [min] | Area [mAU*s] | Height [mAU] | Area %   |
|--------|---------------|------|-------------|--------------|--------------|----------|
| 1      | 3.497         | BB   | 0.0768      | 6114.55322   | 1245.28137   | 100.0000 |

Totals : 6114.55322 1245.28137

*tert*-butyl (*S*)-2-oxo-3-(2,2,2-trifluoroethyl)pyrrolidine-1-carboxylate (**2s**)

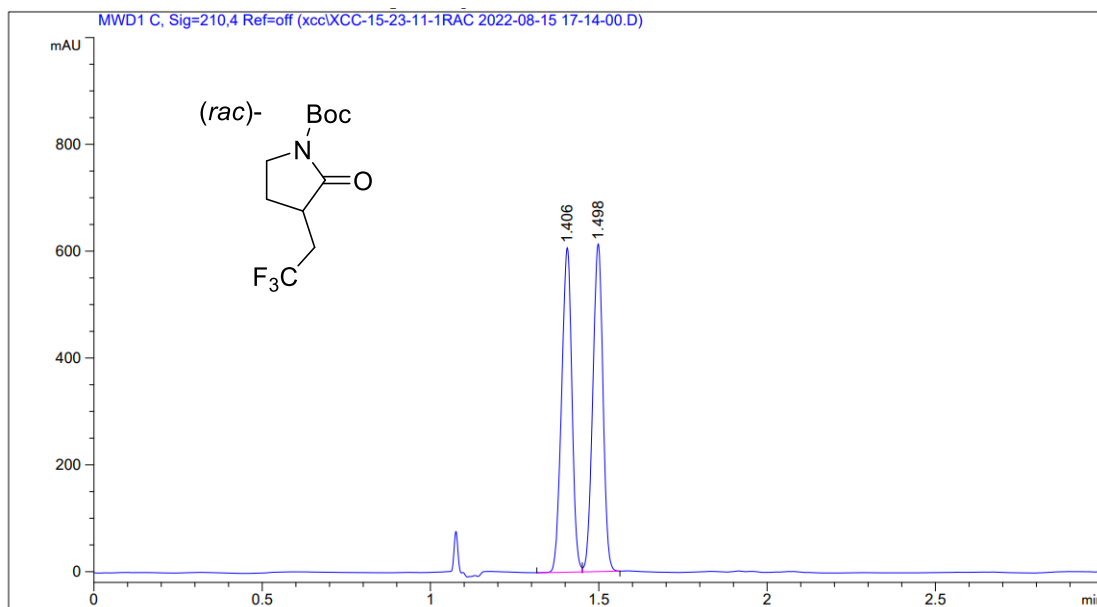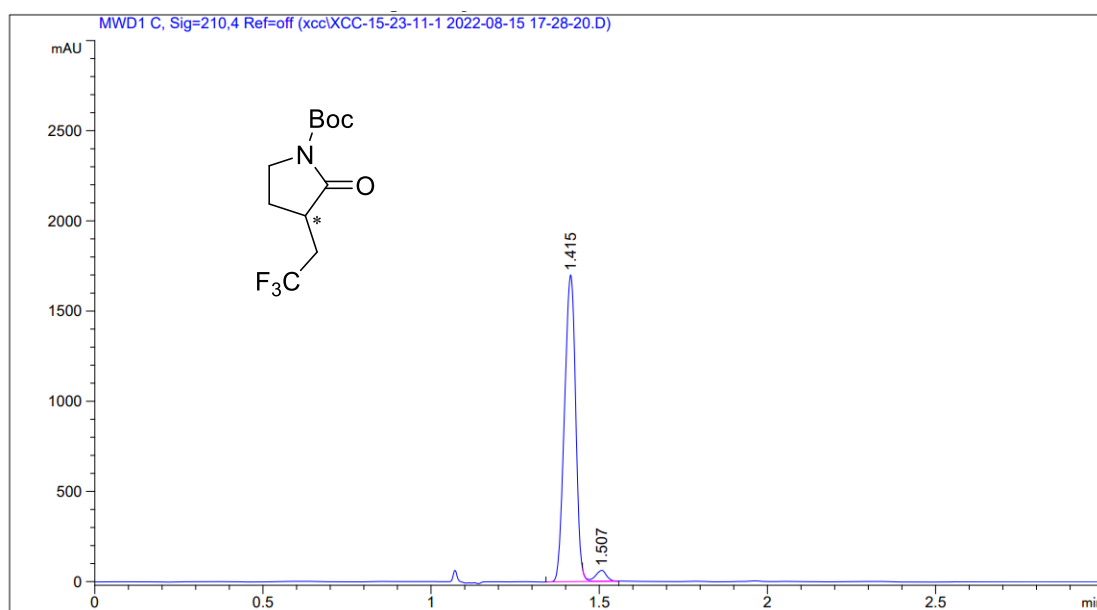

| Peak # | RetTime [min] | Type | Width [min] | Area [mAU*s] | Height [mAU] | Area %  |
|--------|---------------|------|-------------|--------------|--------------|---------|
| 1      | 1.415         | BV R | 0.0364      | 3918.84009   | 1700.91638   | 96.6022 |
| 2      | 1.507         | VB E | 0.0349      | 137.83948    | 60.85395     | 3.3978  |

Totals : 4056.67957 1761.77033



3-(2,2,2-trifluoroethyl)pyrrolidin-2-one (**2t**)

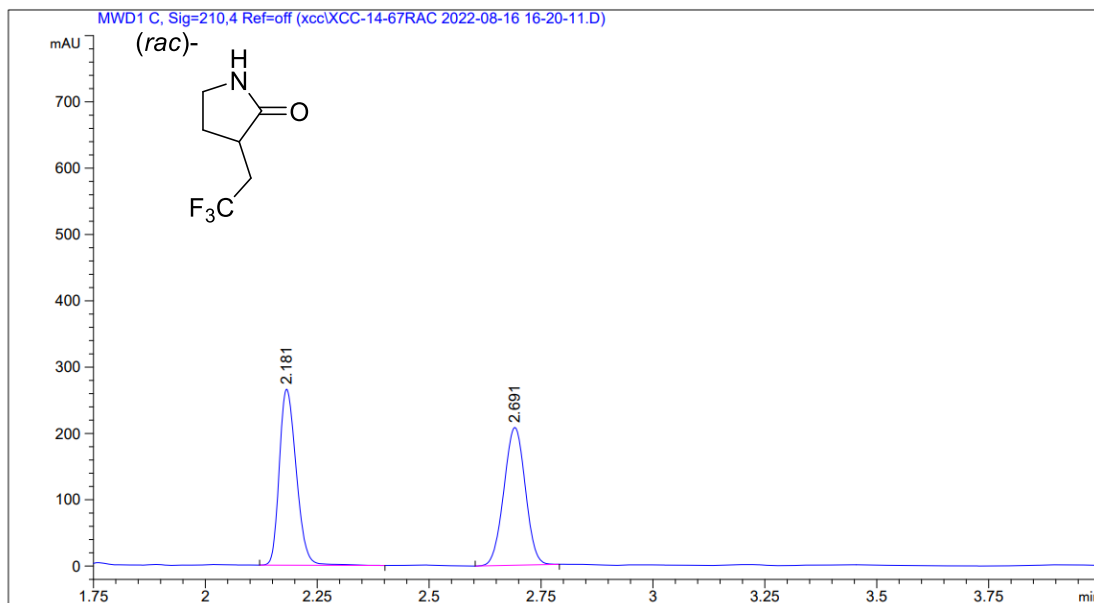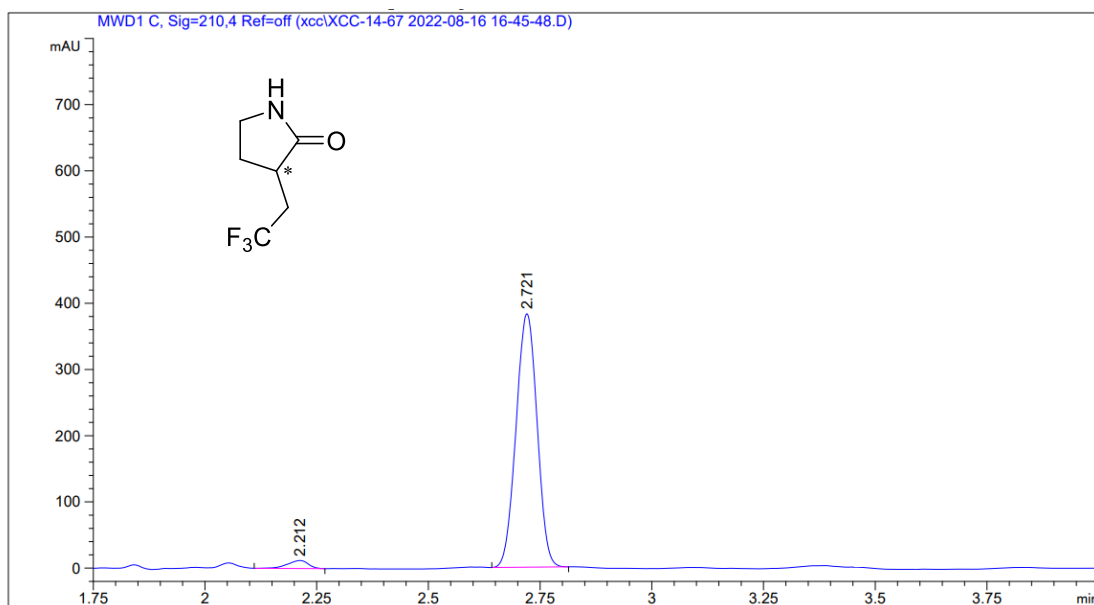

| Peak # | RetTime [min] | Type | Width [min] | Area [mAU*s] | Height [mAU] | Area %  |
|--------|---------------|------|-------------|--------------|--------------|---------|
| 1      | 2.212         | BB   | 0.0483      | 39.66670     | 12.24830     | 3.0655  |
| 2      | 2.721         | BB   | 0.0517      | 1254.29224   | 382.85352    | 96.9345 |

Totals : 1293.95893 395.10182

1-phenyl-3-(2,2,2-trifluoroethyl)piperidin-2-one (**4a**)

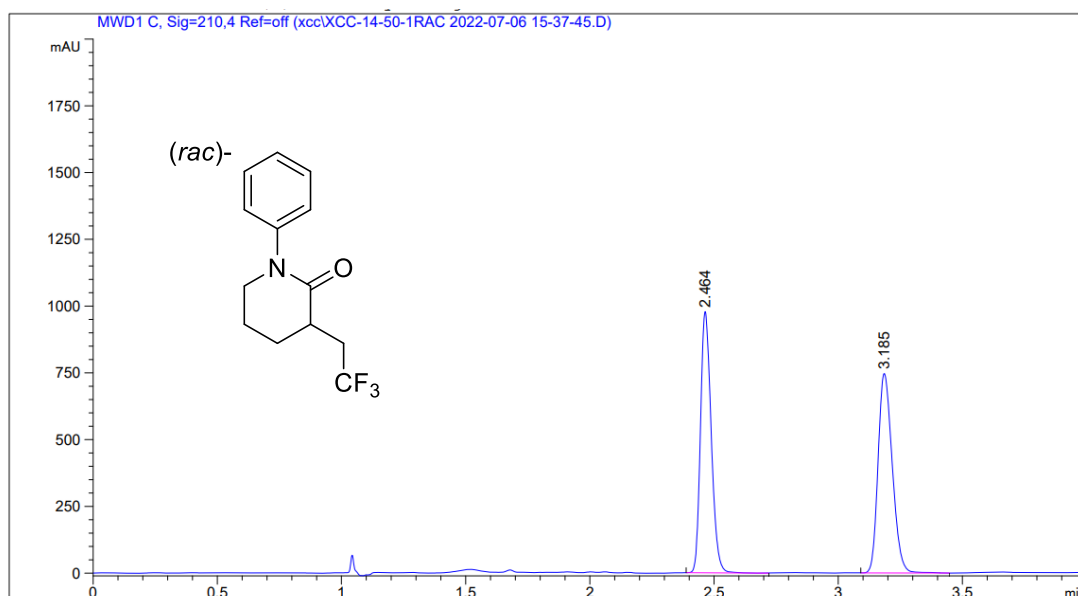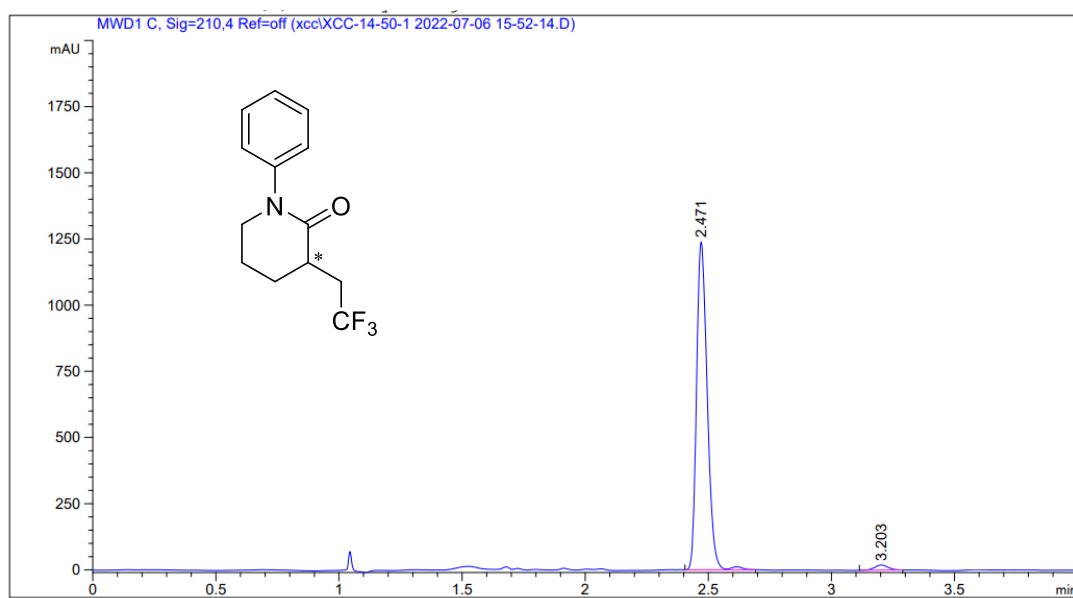

| Peak # | RetTime [min] | Type | Width [min] | Area [mAU*s] | Height [mAU] | Area %  |
|--------|---------------|------|-------------|--------------|--------------|---------|
| 1      | 2.471         | BV R | 0.0470      | 3746.72314   | 1238.81628   | 98.0849 |
| 2      | 3.203         | BB   | 0.0579      | 73.15430     | 19.23549     | 1.9151  |

Totals : 3819.87744 1258.05177

1-(*o*-tolyl)-3-(2,2,2-trifluoroethyl)piperidin-2-one (**4b**)

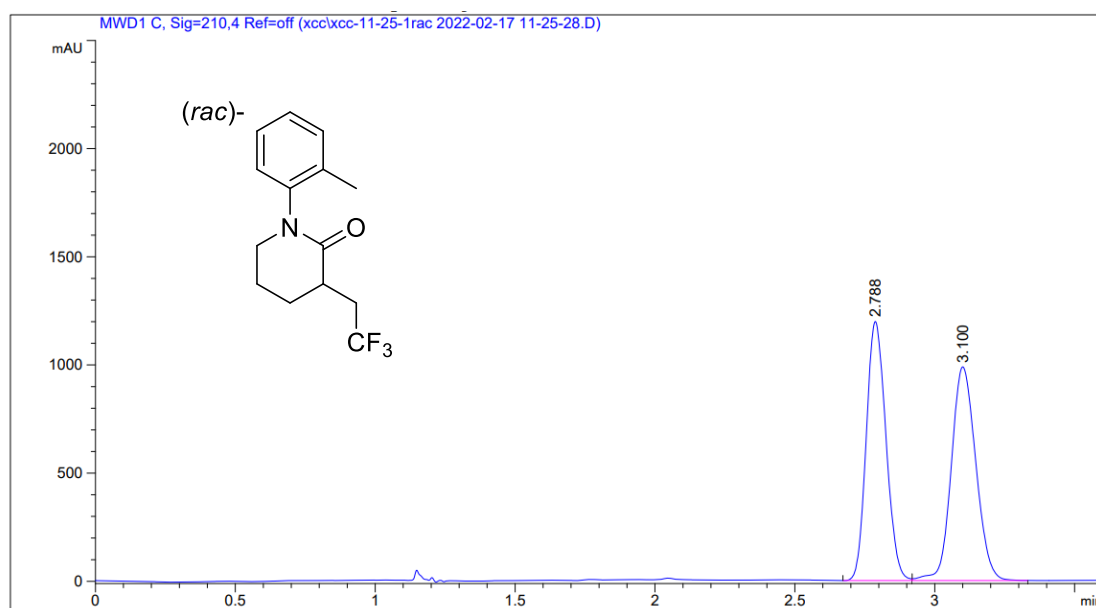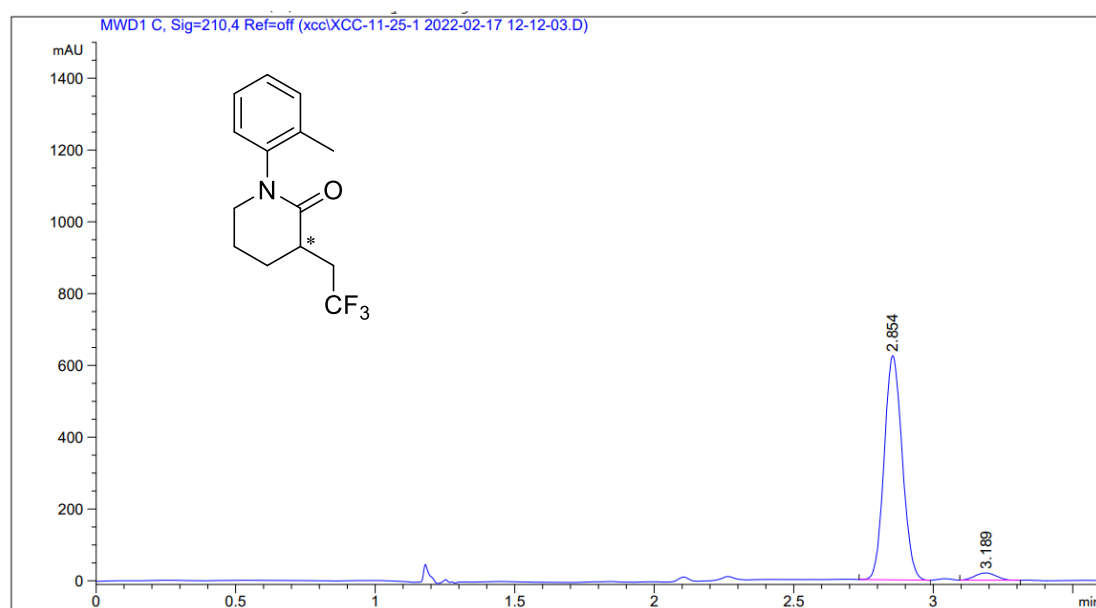

| Peak #   | RetTime [min] | Type | Width [min] | Area [mAU*s] | Height [mAU] | Area %  |
|----------|---------------|------|-------------|--------------|--------------|---------|
| 1        | 2.854         | BB   | 0.0704      | 2803.23413   | 624.26410    | 96.2786 |
| 2        | 3.189         | VB   | 0.0783      | 108.35059    | 20.29696     | 3.7214  |
| Totals : |               |      |             | 2911.58472   | 644.56106    |         |

1-(*m*-tolyl)-3-(2,2,2-trifluoroethyl)piperidin-2-one (**4c**)

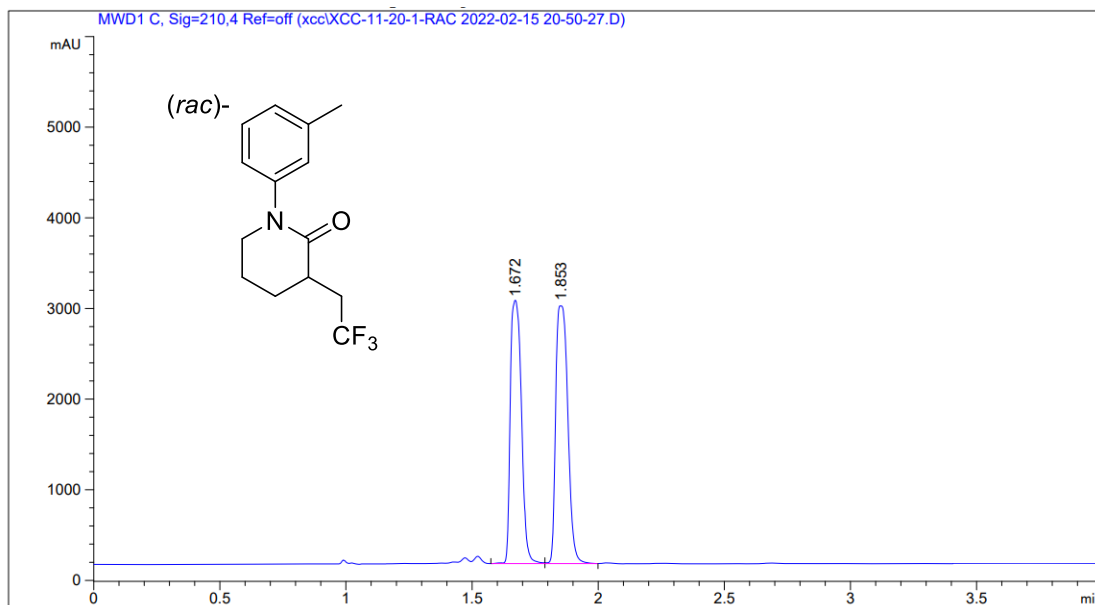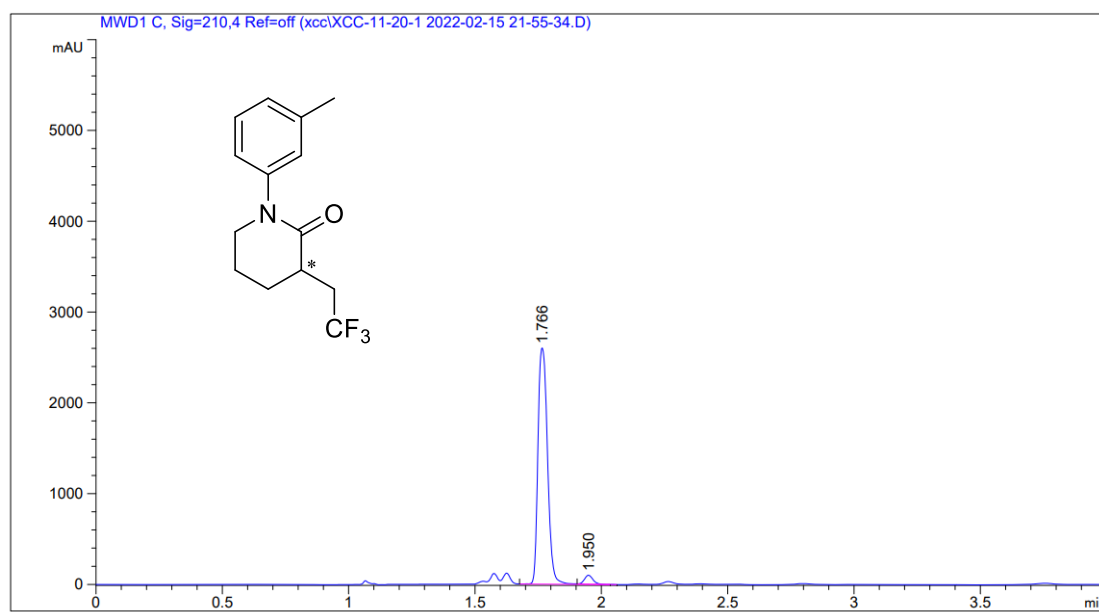

| Peak # | RetTime [min] | Type | Width [min] | Area [mAU*s] | Height [mAU] | Area %  |
|--------|---------------|------|-------------|--------------|--------------|---------|
| 1      | 1.766         | BV R | 0.0416      | 6834.88525   | 2602.01245   | 96.8056 |
| 2      | 1.950         | VB E | 0.0358      | 225.53506    | 98.13914     | 3.1944  |

Totals : 7060.42032 2700.15160

1-(4-methoxyphenyl)-3-(2,2,2-trifluoroethyl)piperidin-2-one (**4d**)

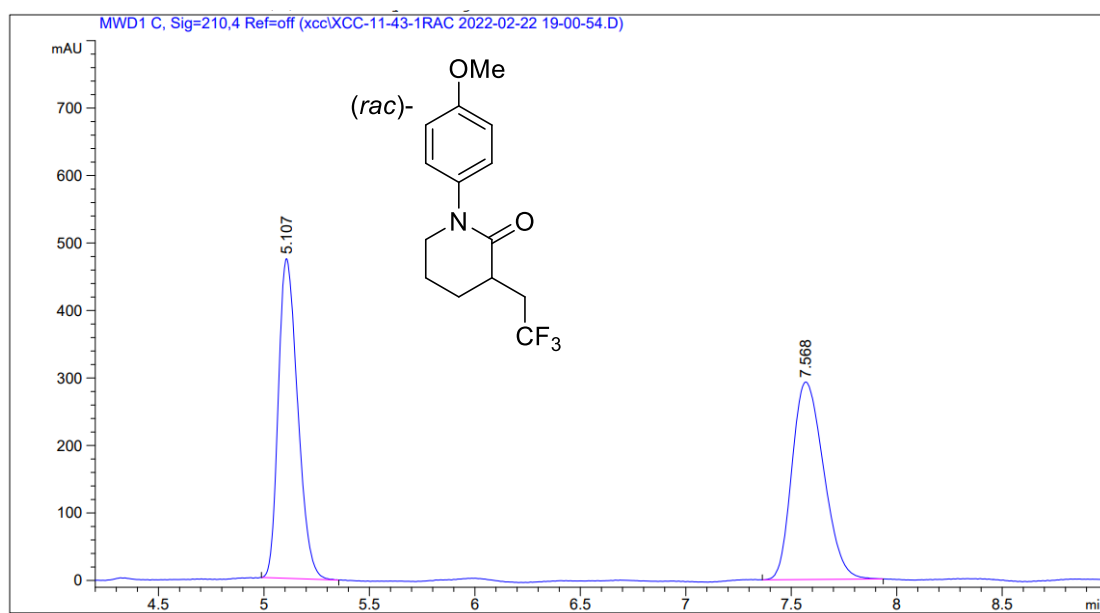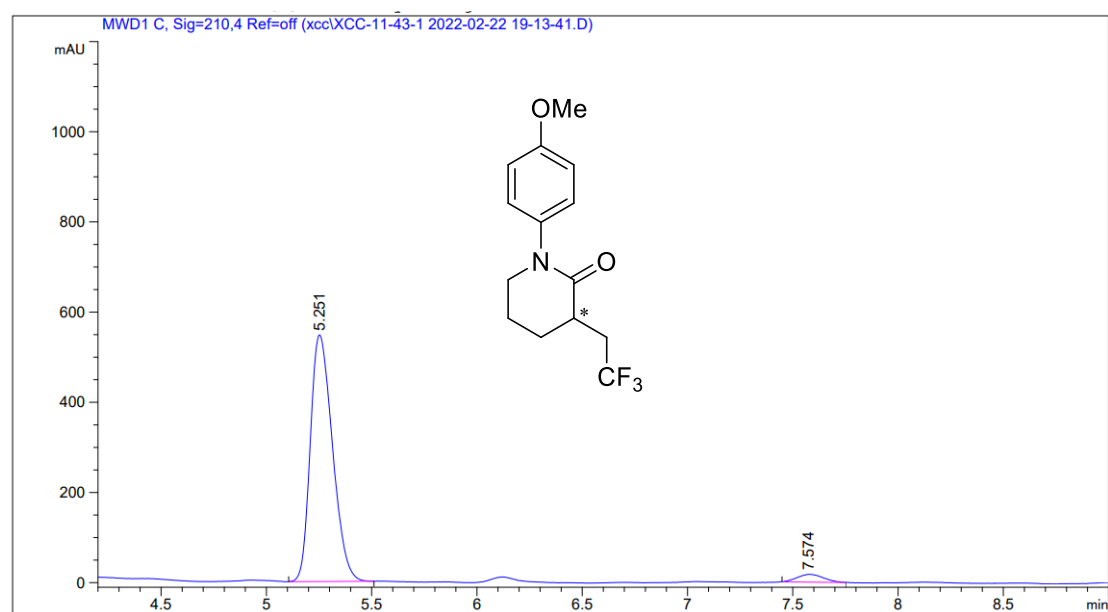

| Peak #   | RetTime [min] | Type | Width [min] | Area [mAU*s] | Height [mAU] | Area %  |
|----------|---------------|------|-------------|--------------|--------------|---------|
| 1        | 5.251         | BB   | 0.1117      | 3996.45313   | 546.96100    | 96.4394 |
| 2        | 7.574         | BB   | 0.1043      | 147.55339    | 17.24218     | 3.5606  |
| Totals : |               |      |             | 4144.00652   | 564.20317    |         |

1-(4-(*tert*-butyl)phenyl)-3-(2,2,2-trifluoroethyl)piperidin-2-one (**4e**)

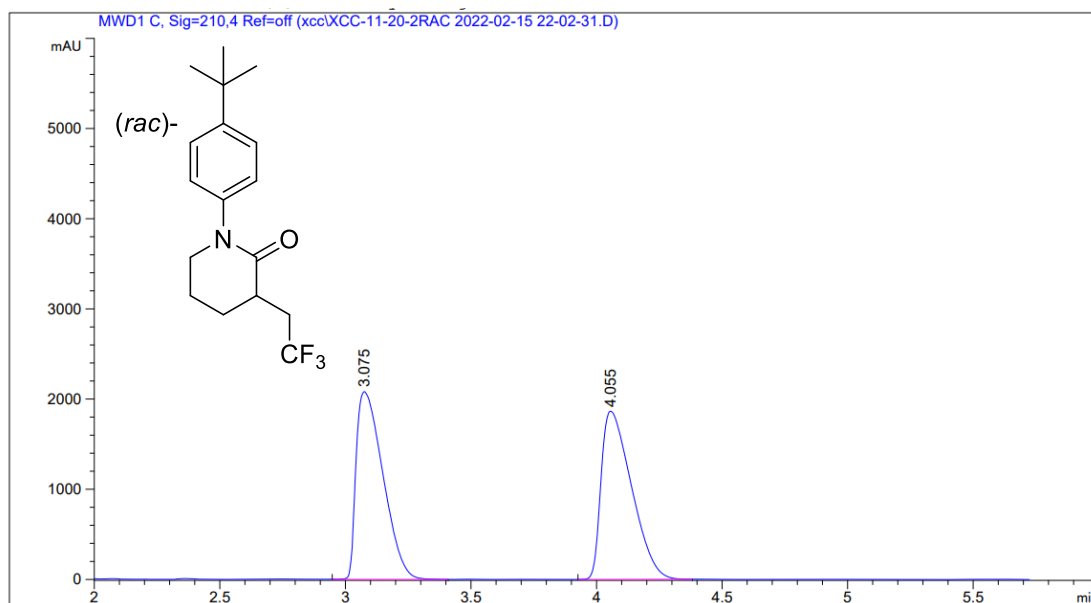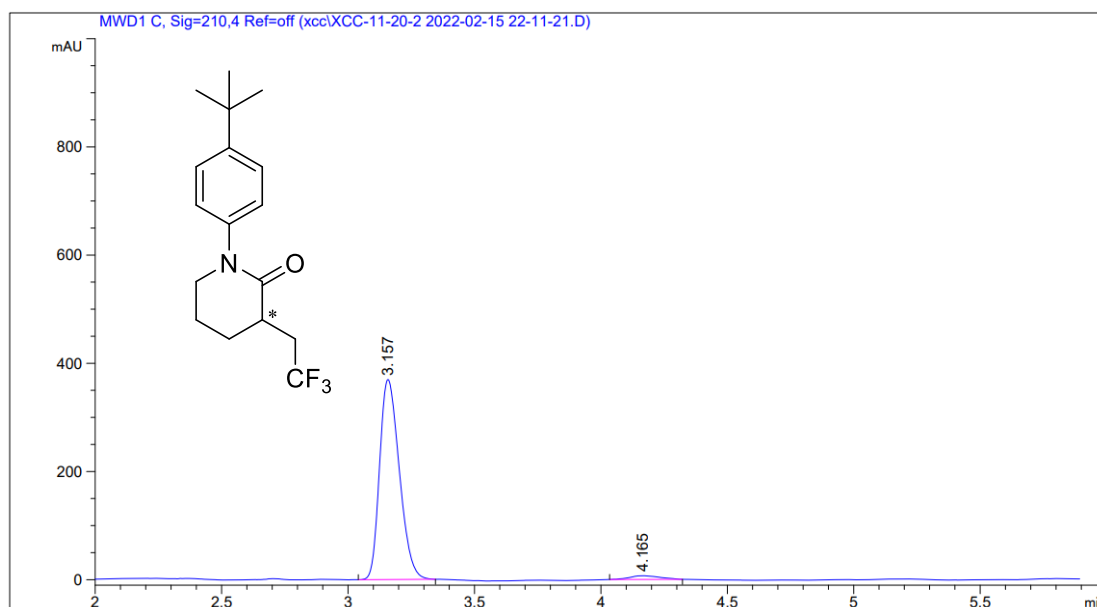

| Peak # | RetTime [min] | Type | Width [min] | Area [mAU*s] | Height [mAU] | Area %  |
|--------|---------------|------|-------------|--------------|--------------|---------|
| 1      | 3.157         | BB   | 0.0848      | 2007.34888   | 369.72351    | 97.2234 |
| 2      | 4.165         | BB   | 0.0989      | 57.32841     | 6.86928      | 2.7766  |

Totals : 2064.67729 376.59279

1-(2-chlorophenyl)-3-(2,2,2-trifluoroethyl)piperidin-2-one (**4f**)

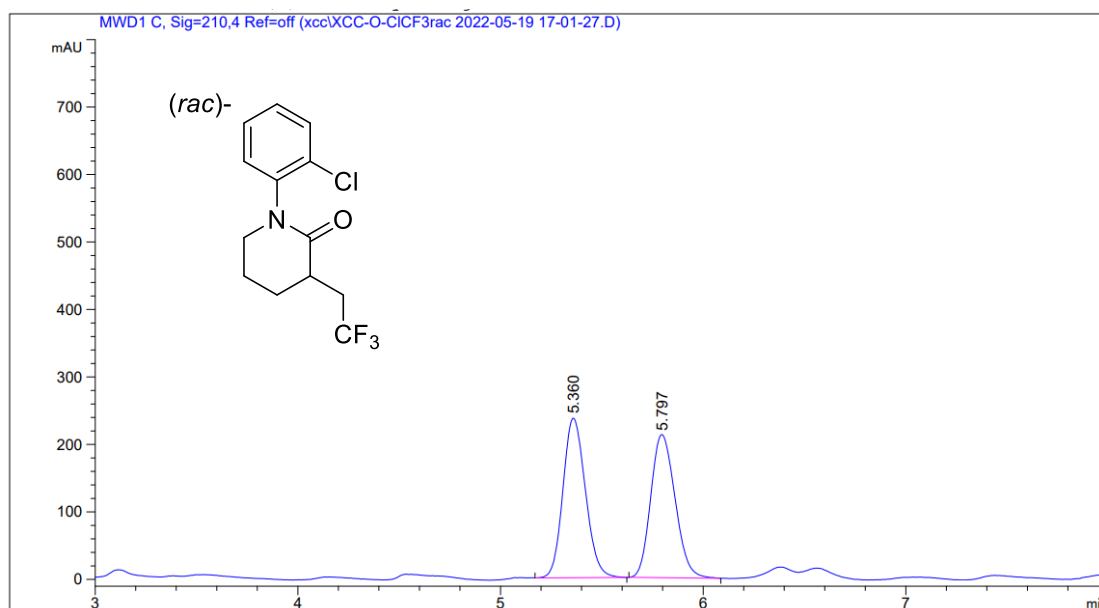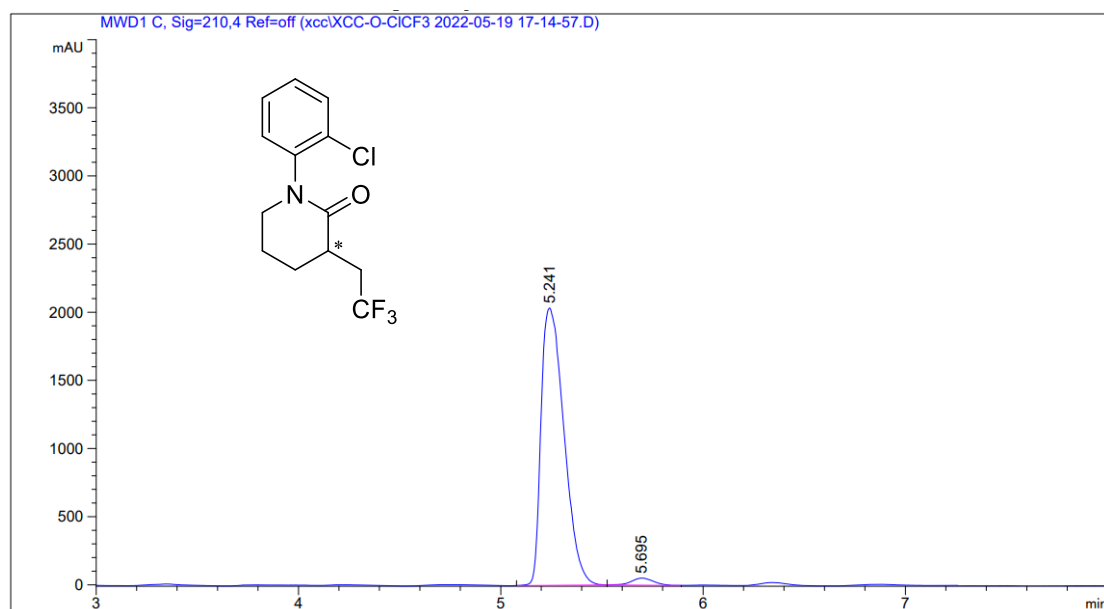

| Peak # | RetTime [min] | Type | Width [min] | Area [mAU*s] | Height [mAU] | Area %  |
|--------|---------------|------|-------------|--------------|--------------|---------|
| 1      | 5.241         | BB   | 0.0992      | 1.59987e4    | 2034.98645   | 97.5781 |
| 2      | 5.695         | BB   | 0.1005      | 397.08264    | 52.36831     | 2.4219  |

Totals : 1.63957e4 2087.35476

1-(3-fluorophenyl)-3-(2,2,2-trifluoroethyl)piperidin-2-one (**4g**)

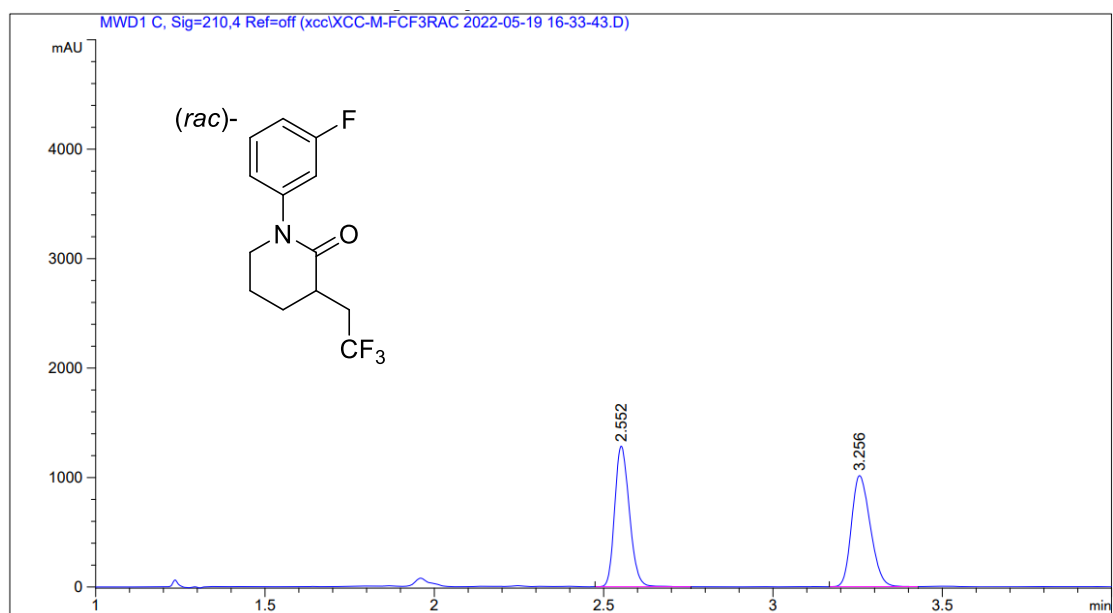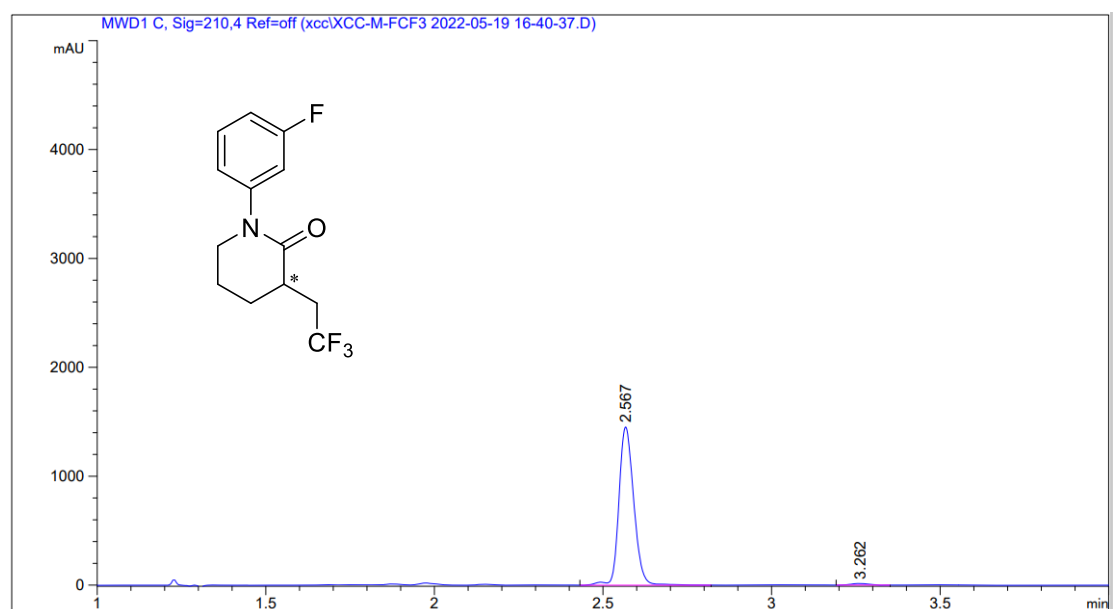

| Peak # | RetTime [min] | Type | Width [min] | Area [mAU*s] | Height [mAU] | Area %  |
|--------|---------------|------|-------------|--------------|--------------|---------|
| 1      | 2.567         | VB R | 0.0477      | 4447.97949   | 1452.87524   | 98.8059 |
| 2      | 3.262         | BB   | 0.0542      | 53.75637     | 15.42774     | 1.1941  |

Totals : 4501.73586 1468.30299



1-(3-bromophenyl)-3-(2,2,2-trifluoroethyl)piperidin-2-one (**4h**)

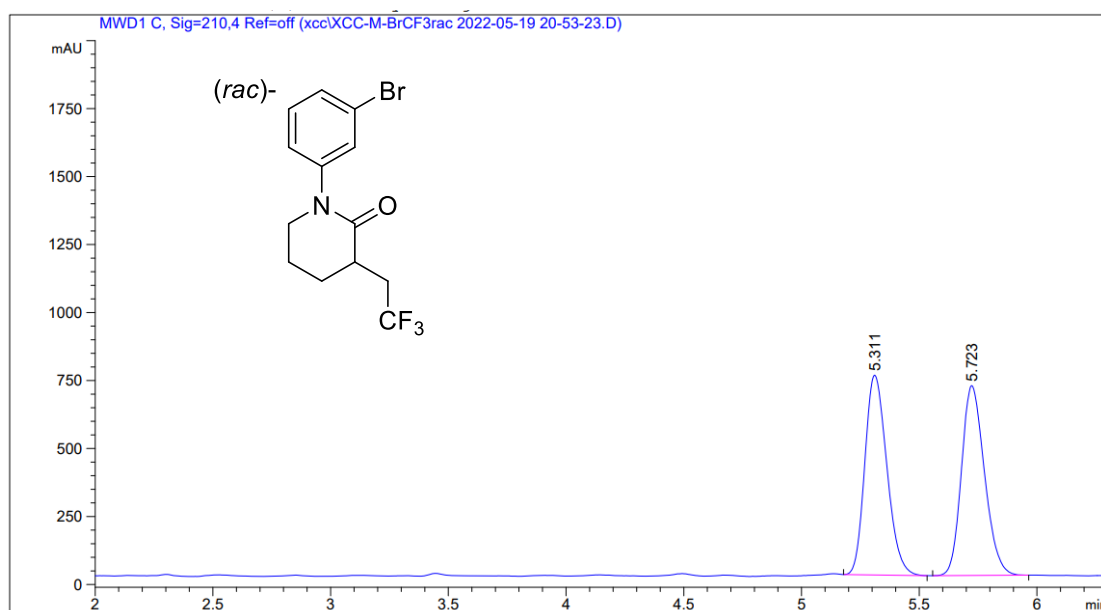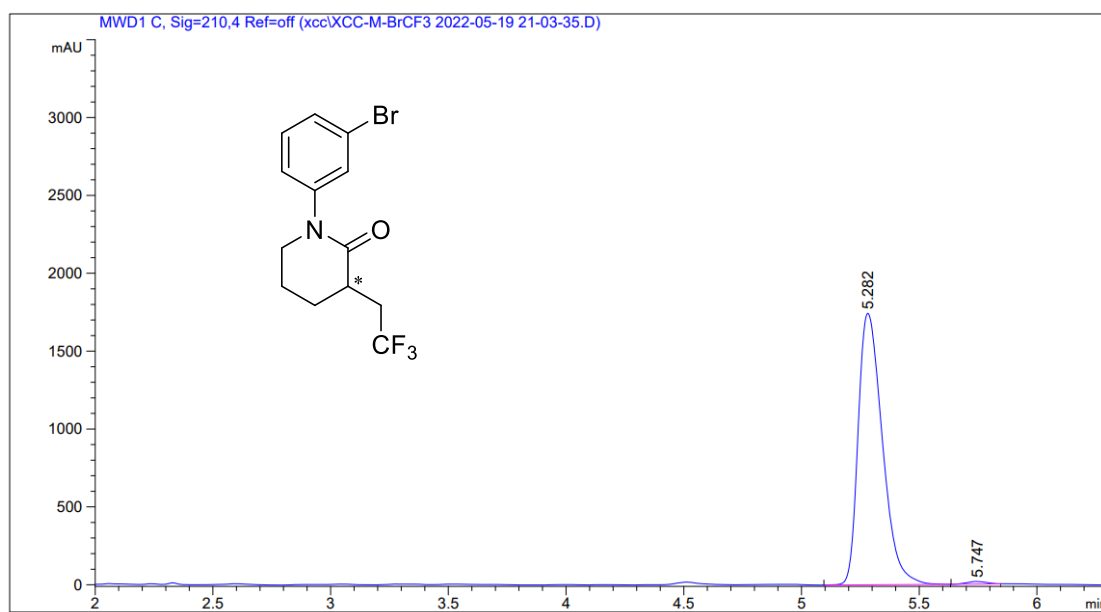

| Peak # | RetTime [min] | Type | Width [min] | Area [mAU*s] | Height [mAU] | Area %  |
|--------|---------------|------|-------------|--------------|--------------|---------|
| 1      | 5.282         | BB   | 0.1098      | 1.24385e4    | 1743.09387   | 99.2472 |
| 2      | 5.747         | BB   | 0.0724      | 94.35030     | 16.21813     | 0.7528  |

Totals : 1.25328e4 1759.31200

1-(4-bromophenyl)-3-(2,2,2-trifluoroethyl)piperidin-2-one (**4i**)

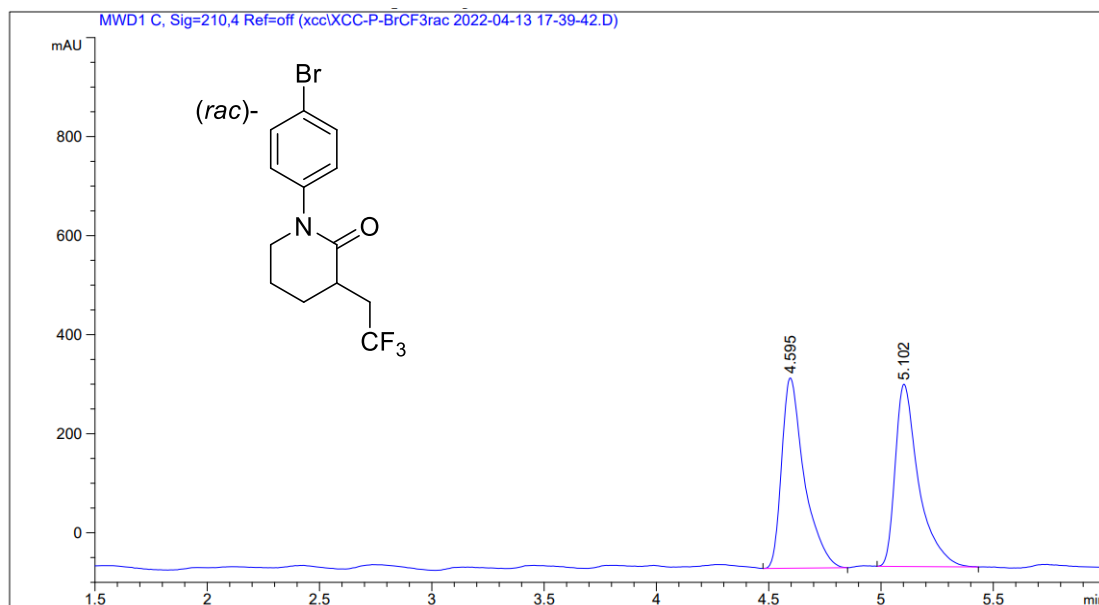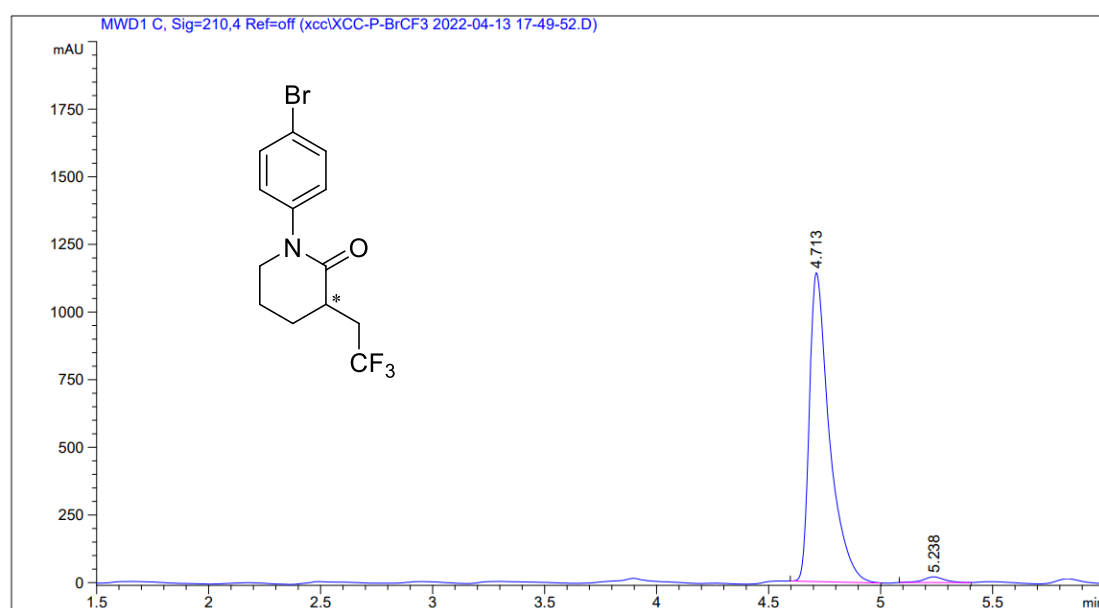

| Peak # | RetTime [min] | Type | Width [min] | Area [mAU*s] | Height [mAU] | Area %  |
|--------|---------------|------|-------------|--------------|--------------|---------|
| 1      | 4.713         | BB   | 0.0924      | 7082.33398   | 1141.08997   | 98.0785 |
| 2      | 5.238         | BB   | 0.0883      | 138.75333    | 20.94371     | 1.9215  |

Totals : 7221.08731 1162.03367

1-(4-fluorophenyl)-3-(2,2,2-trifluoroethyl)piperidin-2-one (**4j**)

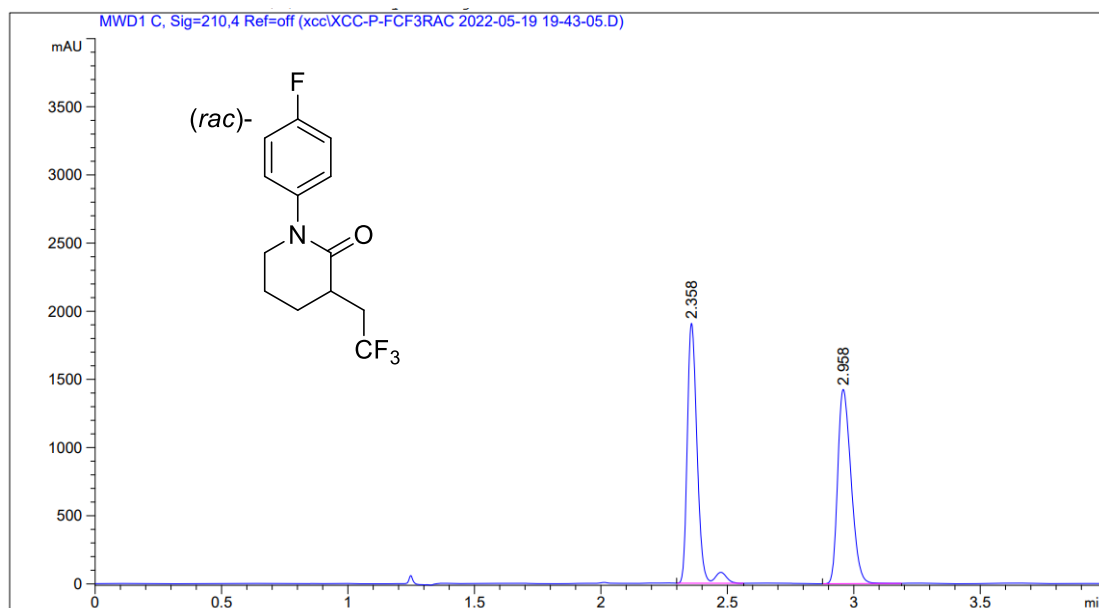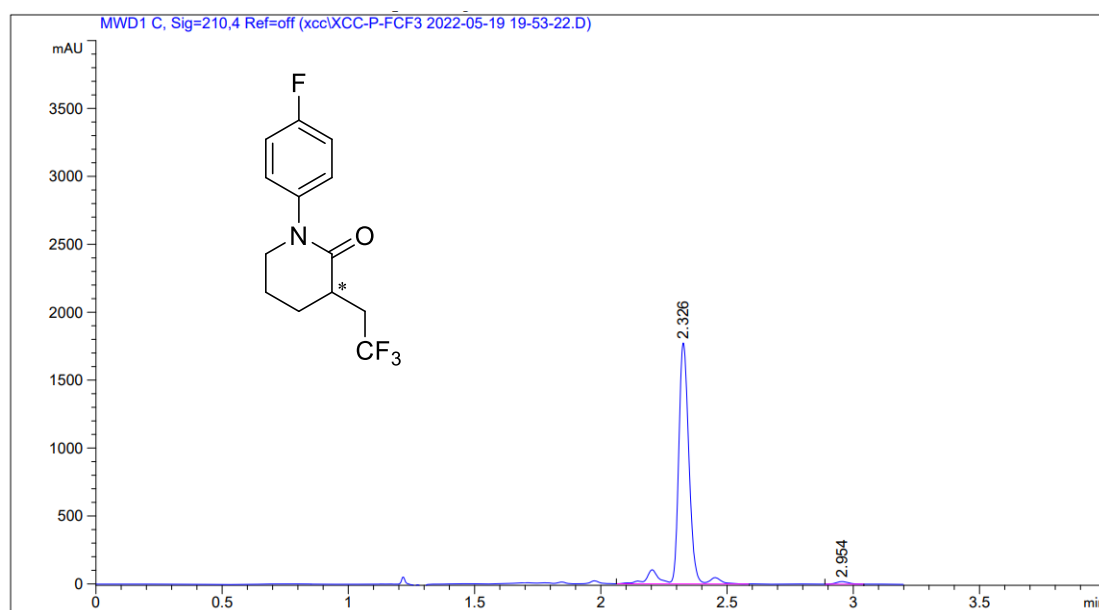

| Peak # | RetTime [min] | Type | Width [min] | Area [mAU*s] | Height [mAU] | Area %  |
|--------|---------------|------|-------------|--------------|--------------|---------|
| 1      | 2.326         | VV R | 0.0429      | 5375.07373   | 1774.05896   | 98.8323 |
| 2      | 2.954         | BB   | 0.0505      | 63.50900     | 19.02128     | 1.1677  |

Totals : 5438.58273 1793.08024

1-([1,1'-biphenyl]-4-yl)-3-(2,2,2-trifluoroethyl)piperidin-2-one (**4k**)

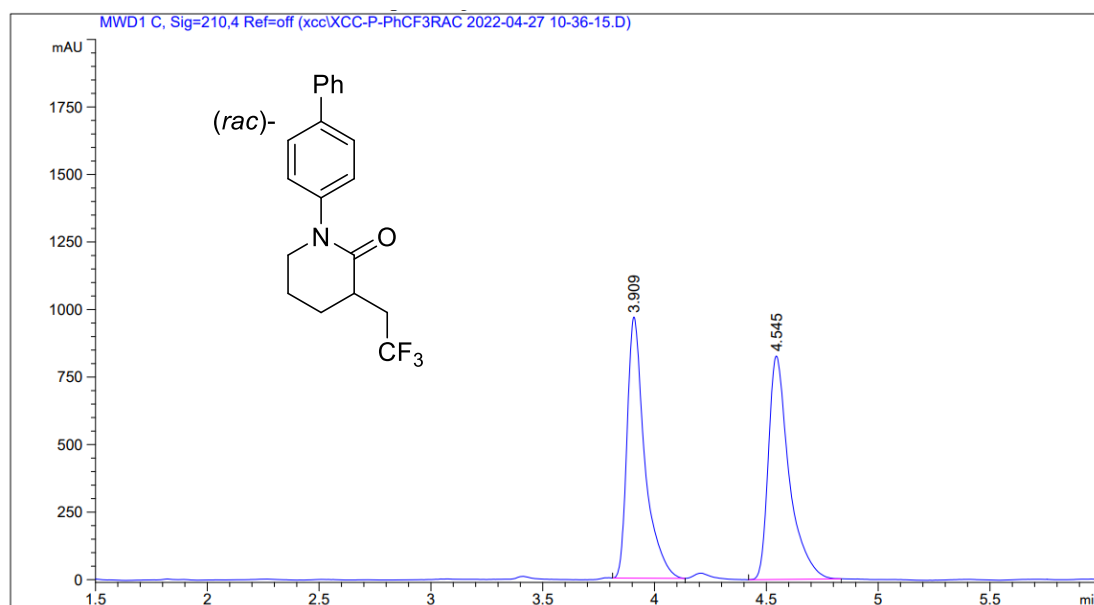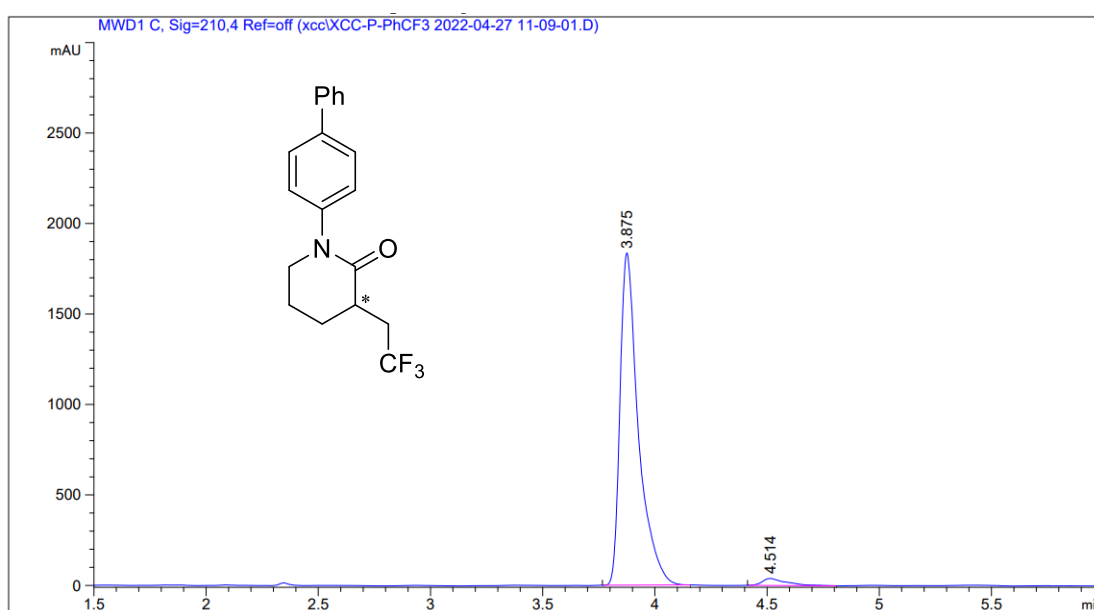

| Peak # | RetTime [min] | Type | Width [min] | Area [mAU*s] | Height [mAU] | Area %  |
|--------|---------------|------|-------------|--------------|--------------|---------|
| 1      | 3.875         | BB   | 0.0849      | 1.04525e4    | 1835.32056   | 97.2923 |
| 2      | 4.514         | BB   | 0.0990      | 290.89856    | 39.24723     | 2.7077  |

Totals : 1.07434e4 1874.56779

1-(3,5-dimethylphenyl)-3-(2,2,2-trifluoroethyl)piperidin-2-one (**41**)

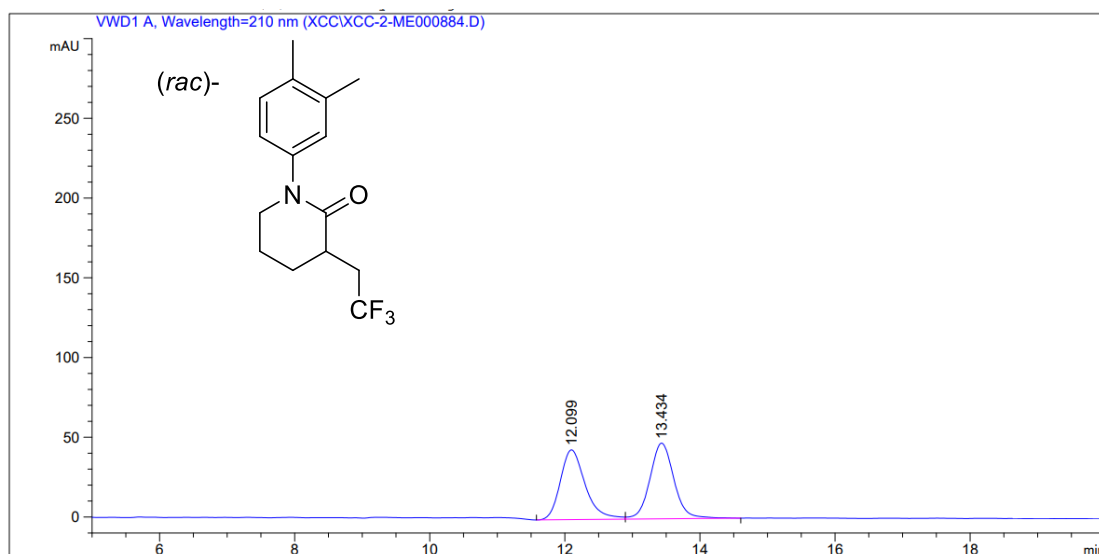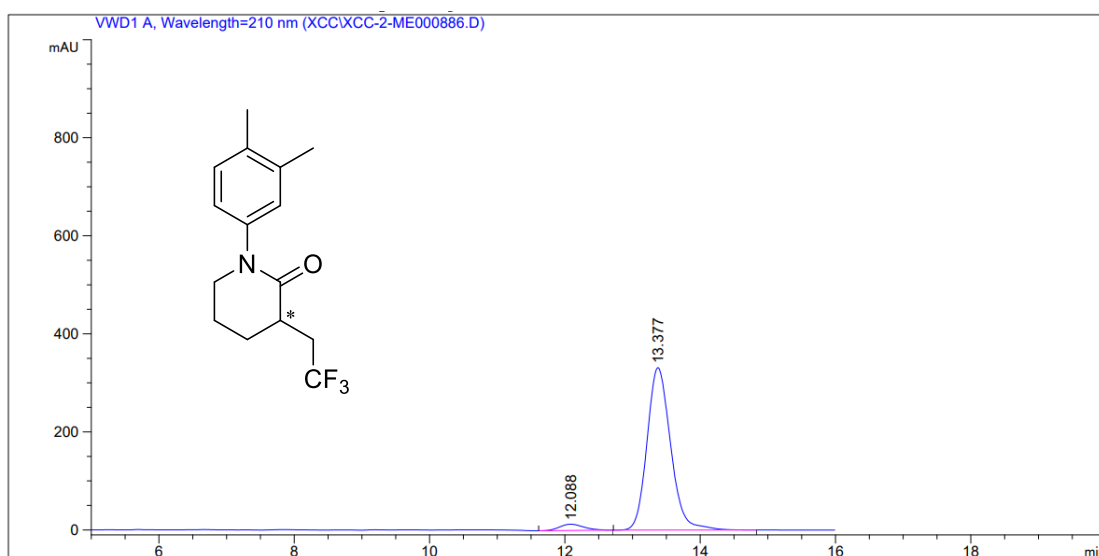

| Peak # | RetTime [min] | Type | Width [min] | Area [mAU*s] | Height [mAU] | Area %  |
|--------|---------------|------|-------------|--------------|--------------|---------|
| 1      | 12.088        | BB   | 0.3856      | 320.26678    | 12.85644     | 3.8393  |
| 2      | 13.377        | BB   | 0.3745      | 8021.53467   | 331.28864    | 96.1607 |

Totals : 8341.80145 344.14508

1-(3,5-dimethylphenyl)-3-(2,2,2-trifluoroethyl)piperidin-2-one (**4m**)

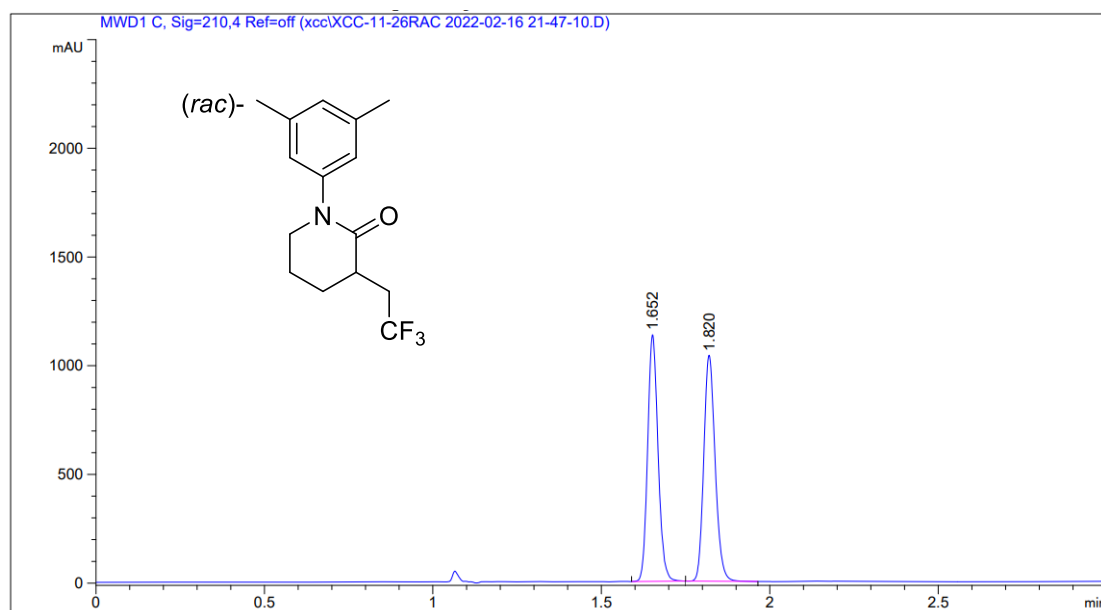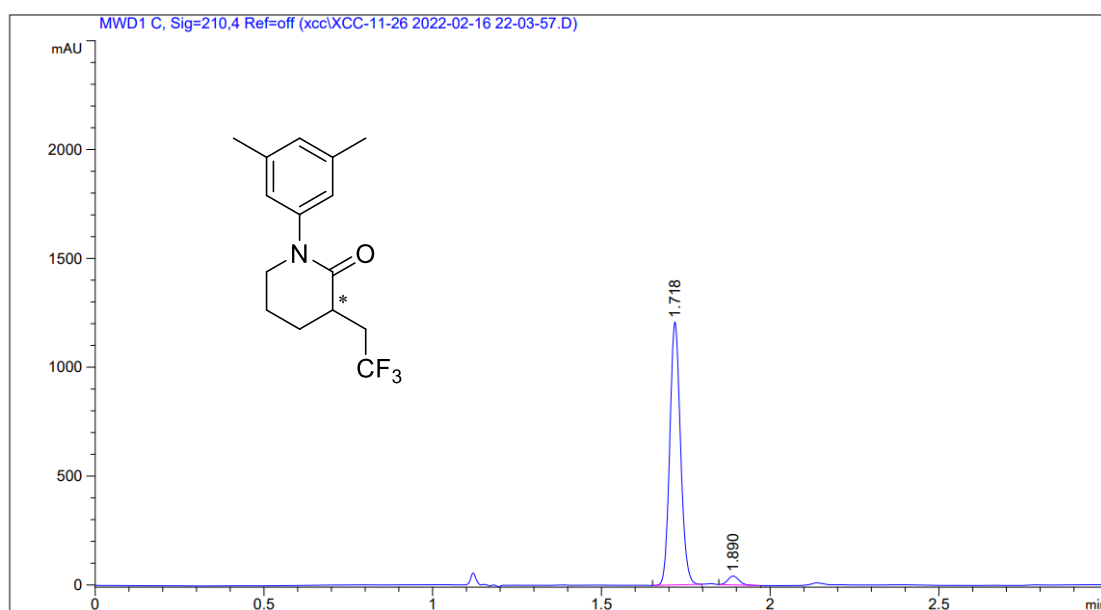

| Peak # | RetTime [min] | Type | Width [min] | Area [mAU*s] | Height [mAU] | Area %  |
|--------|---------------|------|-------------|--------------|--------------|---------|
| 1      | 1.718         | BB   | 0.0337      | 2660.83447   | 1208.53259   | 96.6183 |
| 2      | 1.890         | BB   | 0.0351      | 93.13111     | 40.86246     | 3.3817  |

Totals : 2753.96558 1249.39505

1-phenyl-3-(2,2,2-trifluoroethyl)pyrrolidine (**5**)

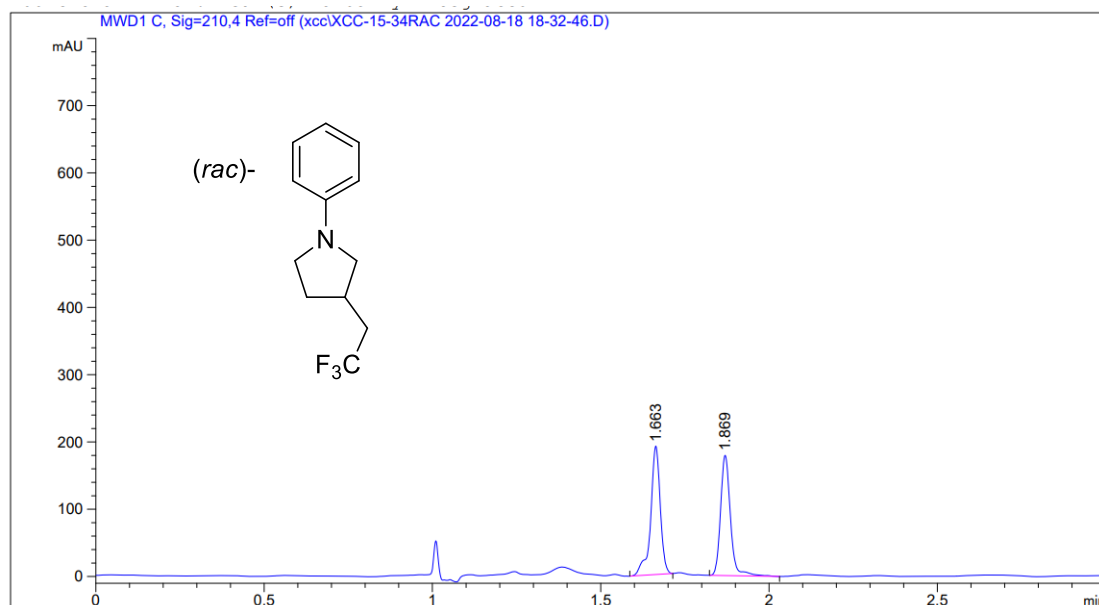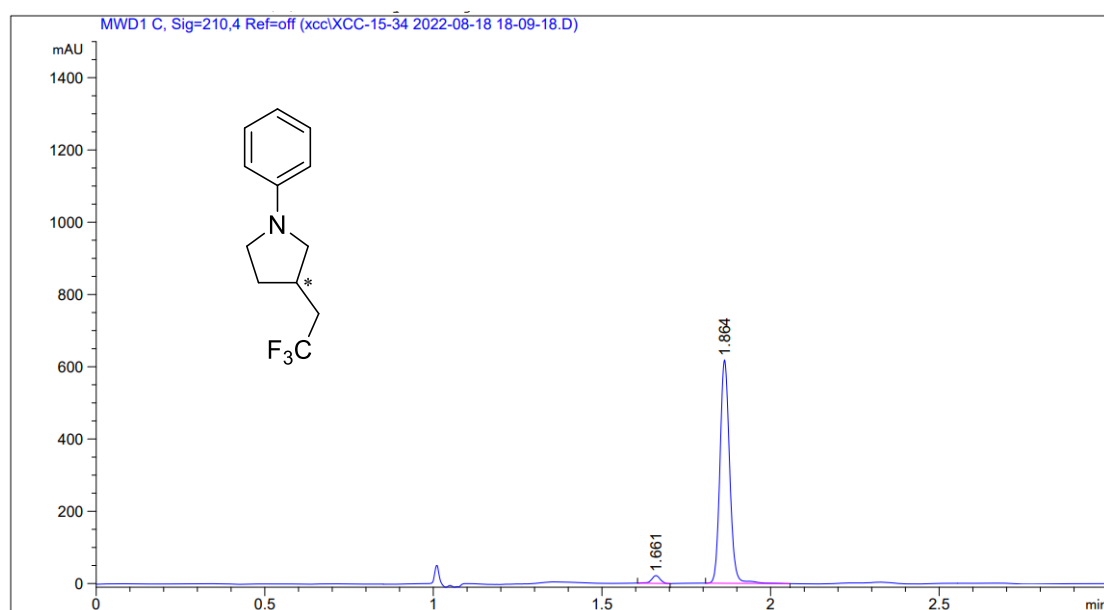

| Peak #   | RetTime [min] | Type | Width [min] | Area [mAU*s] | Height [mAU] | Area %  |
|----------|---------------|------|-------------|--------------|--------------|---------|
| 1        | 1.661         | BB   | 0.0271      | 38.44345     | 21.76937     | 3.0343  |
| 2        | 1.864         | BB   | 0.0307      | 1228.53015   | 618.48969    | 96.9657 |
| Totals : |               |      |             | 1266.97360   | 640.25906    |         |

### 3-(2,2,2-trifluoroethyl)pyrrolidin-2-one (6)

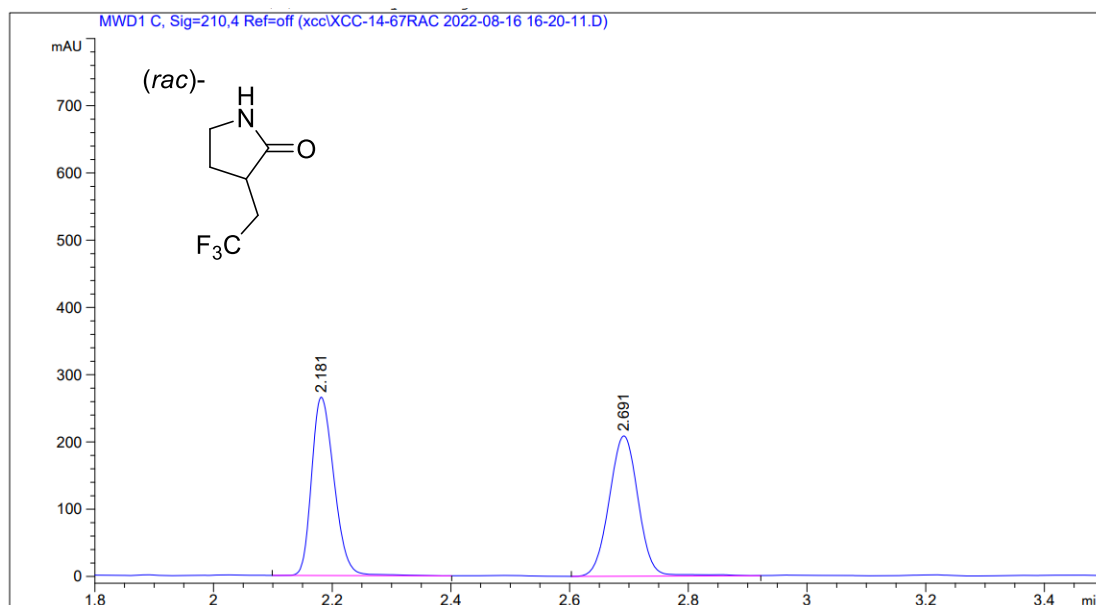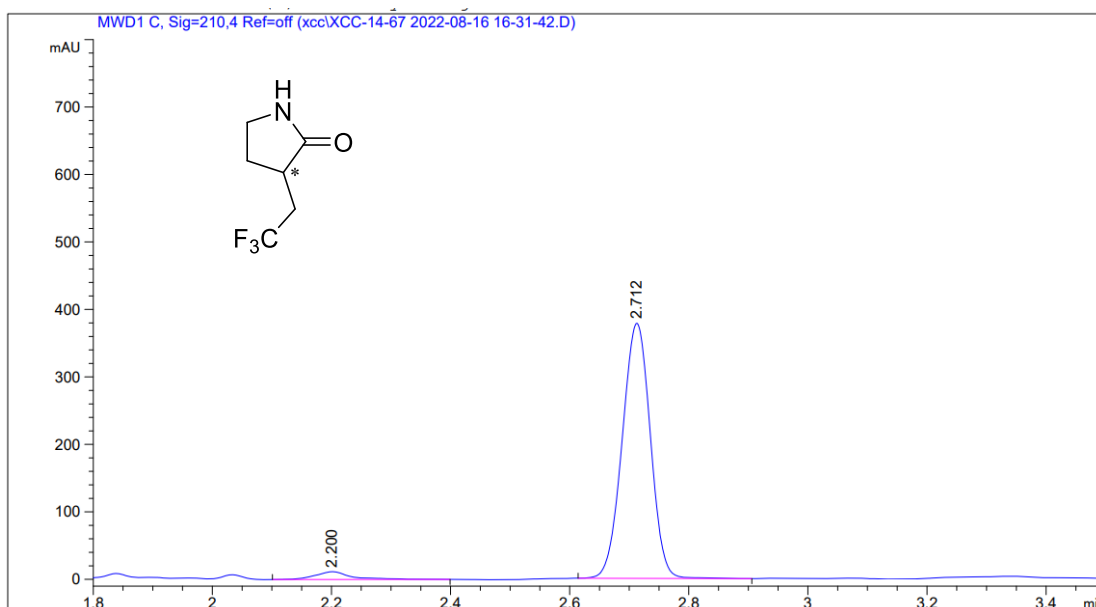

| Peak # | RetTime [min] | Type | Width [min] | Area [mAU*s] | Height [mAU] | Area %  |
|--------|---------------|------|-------------|--------------|--------------|---------|
| 1      | 2.200         | BB   | 0.0601      | 50.74048     | 11.69973     | 3.9332  |
| 2      | 2.712         | BB   | 0.0512      | 1239.32263   | 378.25339    | 96.0668 |

Totals : 1290.06311 389.95311



1-benzyl-3-(2,2,2-trifluoroethyl)pyrrolidine (**7**)

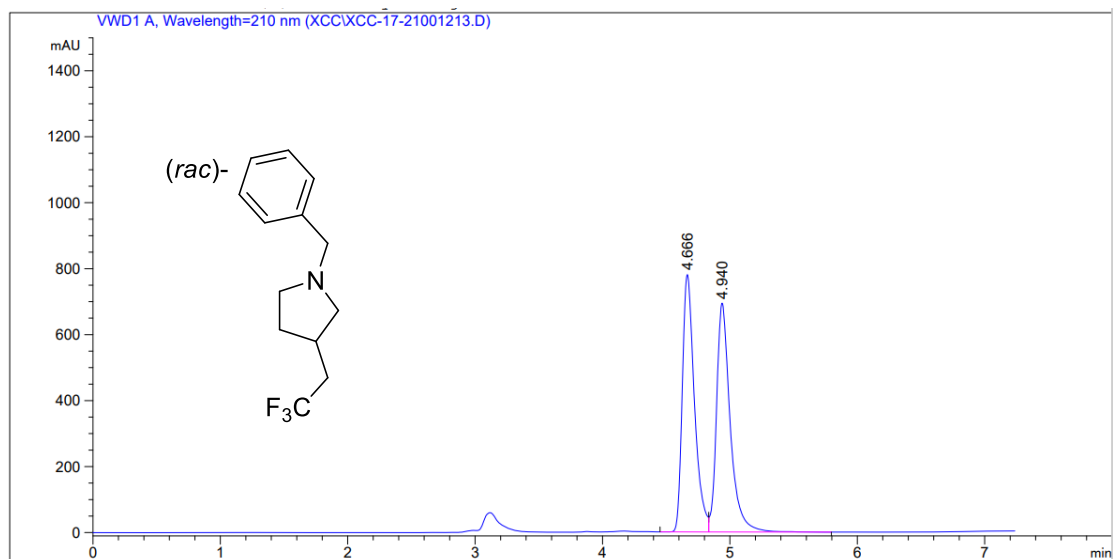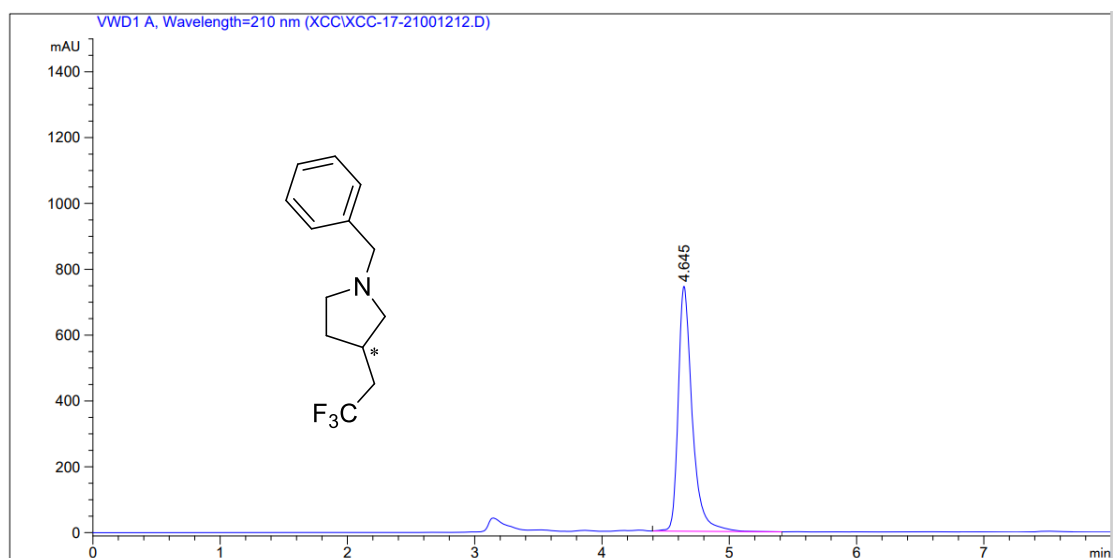

| Peak #   | RetTime [min] | Type | Width [min] | Area [mAU*s] | Height [mAU] | Area %   |
|----------|---------------|------|-------------|--------------|--------------|----------|
| 1        | 4.645         | BB   | 0.1142      | 5688.37646   | 743.93665    | 100.0000 |
| Totals : |               |      |             | 5688.37646   | 743.93665    |          |

## 8. X-ray crystallographic analysis of compound 21.

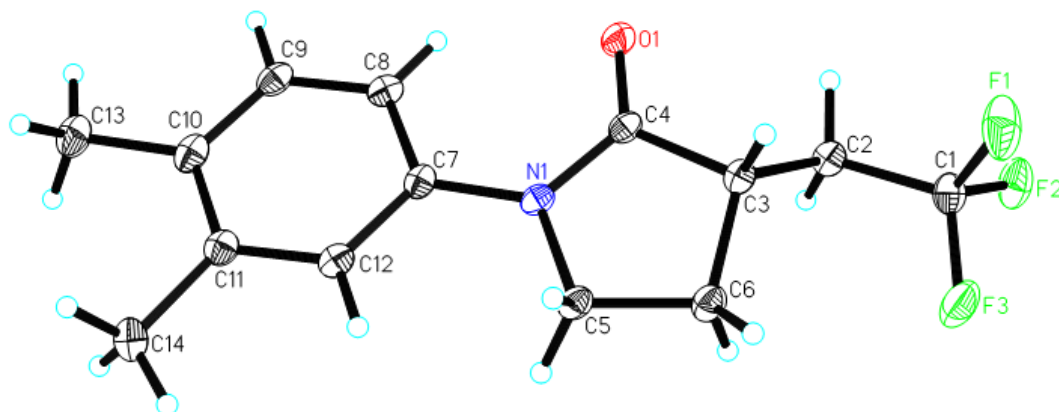

**Table S1. Crystal Data and Experimental Parameters for Compound 21**

| Compound                                             | <b>21</b>                                         |
|------------------------------------------------------|---------------------------------------------------|
| Formula                                              | C <sub>14</sub> H <sub>16</sub> F <sub>3</sub> NO |
| Fw                                                   | 271.28                                            |
| crystal system                                       | monoclinic                                        |
| space group                                          | P1211                                             |
| <i>a</i> (Å)                                         | 6.4877(3)                                         |
| <i>b</i> (Å)                                         | 14.6746(8)                                        |
| <i>c</i> (Å)                                         | 13.7914(6)                                        |
| <i>α</i> (deg)                                       | 90                                                |
| <i>β</i> (deg)                                       | 99.427(4)                                         |
| <i>γ</i> (deg)                                       | 90                                                |
| <i>V</i> (Å <sup>3</sup> )                           | 1295.27(11)                                       |
| <i>Z</i>                                             | 4                                                 |
| <i>D</i> <sub>calc</sub> (g/cm <sup>3</sup> )        | 1.391                                             |
| <i>μ</i> (Mo/Kα) <sub>calc</sub> (cm <sup>-1</sup> ) | 1.001                                             |
| size (mm)                                            | 0.20 × 0.15 × 0.10                                |
| <i>F</i> (000)                                       | 568                                               |
| 2 <i>θ</i> range (deg)                               | 8.864 to 144.996                                  |
| no. of reflns, collected                             | 11747                                             |
| no of obsd reflns                                    | 4640                                              |
| no of variables                                      | 347                                               |

|                                     |            |
|-------------------------------------|------------|
| abscorr ( $T_{\max}$ , $T_{\min}$ ) | 1.00, 0.73 |
| R                                   | 0.049      |
| $R_w$                               | 0.117      |
| $R_{\text{all}}$                    | 0.058      |
| Absolute structure parameter        | 0.01 (13)  |
| Gof                                 | 1.01       |
| CCDC                                | 2235529    |

---
